# Supplementary material for: Identification of Salty Dietary Patterns of the Japanese Macroregion
Source: Hindawi journal article supplement (doi:10.1155/2021/6675418), 2021-07-22
Supplement: f1 [file 6675418.f1.zip]

(品目分類) 第4表 都市階級・地方・都道府県庁所在市別1世帯当たり年間の品目別支出金額, 購入数量(二人以上の世帯)

(Commodity Classification) Table 4 Yearly Amount of Expenditures and Quantities per Household by City Group,District,

Major Metropolitan Area and City with Prefectural Government (Two-or-more-person Households)

平成25年 2013

| 都 市 階 級<br>都 道 府 県 庁 所 在 市 | 世 帯 数<br>分 布<br>(抽 出 率<br>調 査) | 集 計<br>世 帯 数 | 世帯人員<br>(人) | 有業人員<br>(人) | 世帯主の<br>年 齢<br>(歳) | 102～981    | 102～398・  | 米     | 食      | パン     | 生うどん・そ | 乾うどん・そ | スパゲッティ | 中 華 麺 | 小 麦 粉 | も ち   | ま ぐ ろ | あ じ   | い わ し | か つ お | か れ い | さ け   | さ ば   | さんま   | た い   | ぶ り   | い か   | た こ |                         |                                  |
|----------------------------|--------------------------------|--------------|-------------|-------------|--------------------|------------|-----------|-------|--------|--------|--------|--------|--------|-------|-------|-------|-------|-------|-------|-------|-------|-------|-------|-------|-------|-------|-------|-----|-------------------------|----------------------------------|
|                            |                                |              |             |             |                    | 消費支出       | 39A・39B・  |       |        |        |        |        |        |       |       |       |       |       |       |       |       |       |       |       |       |       |       |     |                         |                                  |
|                            |                                |              |             |             |                    | 金額         | 食 料       |       |        |        |        |        |        |       |       |       |       |       |       |       |       |       |       |       |       |       |       |     |                         |                                  |
|                            |                                |              |             |             |                    | City group | District  |       |        |        |        |        |        |       |       |       |       |       |       |       |       |       |       |       |       |       |       |     | Major metropolitan area | City with prefectural government |
| 全 国 All Japan              | 10,000                         | 7,784        | 3.05        | 1.34        | 57.9               | 3,485,454  | 895,860   | 75.17 | 19,636 | 10,555 | 4,286  | 3,224  | 8,865  | 2,817 | 2,437 | 2,369 | 1,087 | 737   | 1,002 | 1,038 | 3,058 | 1,184 | 1,342 | 505   | 2,169 | 2,306 | 789   |     |                         |                                  |
| 札 幌 市 Sapporo-shi          | 151                            | 94           | 2.91        | 1.26        | 56.6               | 3,350,286  | 833,142   | 85.54 | 14,798 | 9,097  | 4,089  | 4,086  | 9,068  | 2,072 | 2,351 | 2,085 | 169   | 534   | 525   | 2,197 | 4,749 | 719   | 2,692 | 65    | 822   | 3,509 | 1,090 |     |                         |                                  |
| 青 森 市 Aomori-shi           | 23                             | 95           | 3.17        | 1.33        | 58.3               | 2,957,346  | 806,779   | 88.09 | 18,103 | 10,531 | 3,589  | 3,467  | 12,055 | 2,731 | 1,784 | 2,268 | 708   | 1,493 | 1,152 | 3,312 | 4,652 | 1,708 | 3,142 | 257   | 1,609 | 4,602 | 685   |     |                         |                                  |
| 盛 岡 市 Morioka-shi          | 22                             | 95           | 3.15        | 1.28        | 59.9               | 3,316,984  | 850,737   | 75.94 | 16,349 | 10,360 | 7,923  | 3,084  | 10,888 | 3,512 | 2,135 | 2,382 | 573   | 456   | 1,863 | 1,581 | 4,218 | 868   | 2,847 | 180   | 1,718 | 2,515 | 554   |     |                         |                                  |
| 仙 台 市 Sendai-shi           | 76                             | 93           | 2.97        | 1.12        | 59.8               | 3,473,145  | 928,604   | 64.94 | 16,378 | 9,541  | 6,662  | 2,881  | 8,574  | 2,154 | 2,760 | 2,979 | 448   | 579   | 2,305 | 1,545 | 3,581 | 694   | 2,205 | 105   | 1,429 | 2,731 | 875   |     |                         |                                  |
| 秋 田 市 Akita-shi            | 25                             | 93           | 2.95        | 1.22        | 59.9               | 3,274,371  | 847,368   | 80.17 | 12,701 | 10,730 | 5,818  | 2,951  | 9,902  | 2,640 | 1,242 | 2,269 | 731   | 992   | 1,074 | 2,087 | 3,832 | 1,449 | 2,926 | 979   | 2,028 | 3,532 | 524   |     |                         |                                  |
| 山 形 市 Yamagata-shi         | 19                             | 94           | 3.29        | 1.54        | 58.9               | 3,778,583  | 935,002   | 85.11 | 14,593 | 10,838 | 6,775  | 3,165  | 10,539 | 2,684 | 1,986 | 2,441 | 340   | 557   | 1,395 | 1,089 | 3,766 | 968   | 2,085 | 207   | 1,841 | 2,854 | 542   |     |                         |                                  |
| 福 島 市 Fukushima-shi        | 22                             | 94           | 2.98        | 1.42        | 59.4               | 3,290,341  | 844,919   | 80.83 | 13,044 | 10,296 | 4,639  | 3,354  | 7,297  | 2,370 | 1,158 | 2,834 | 299   | 343   | 2,306 | 1,244 | 3,811 | 819   | 1,672 | 229   | 1,381 | 2,686 | 510   |     |                         |                                  |
| 水 戸 市 Mitō-shi             | 21                             | 94           | 2.92        | 1.21        | 57.2               | 3,482,624  | 869,195   | 55.66 | 16,528 | 8,607  | 4,762  | 3,337  | 7,680  | 2,261 | 1,922 | 2,754 | 804   | 290   | 2,395 | 900   | 3,190 | 715   | 1,663 | 304   | 1,834 | 1,579 | 791   |     |                         |                                  |
| 宇 都 宮 市 Utsunomiya-shi     | 40                             | 94           | 3.06        | 1.39        | 56.3               | 3,704,386  | 907,846   | 62.22 | 18,551 | 10,377 | 4,780  | 3,290  | 8,658  | 2,584 | 2,171 | 3,215 | 505   | 528   | 1,174 | 678   | 3,248 | 1,011 | 1,434 | 111   | 1,510 | 1,910 | 580   |     |                         |                                  |
| 前 橋 市 Maebashi-shi         | 27                             | 92           | 3.00        | 1.38        | 56.7               | 3,428,762  | 855,697   | 72.72 | 15,278 | 11,265 | 5,977  | 3,245  | 8,825  | 3,085 | 2,164 | 3,591 | 942   | 432   | 676   | 429   | 3,780 | 860   | 1,045 | 85    | 1,066 | 2,057 | 507   |     |                         |                                  |
| さ い た ま 市 Saitama-shi      | 100                            | 94           | 3.05        | 1.34        | 55.5               | 3,704,840  | 966,689   | 71.01 | 19,781 | 10,796 | 4,744  | 4,829  | 9,424  | 3,249 | 2,997 | 3,093 | 893   | 435   | 838   | 655   | 3,180 | 925   | 1,225 | 240   | 1,666 | 1,700 | 783   |     |                         |                                  |
| 千 葉 市 Chiba-shi            | 79                             | 93           | 2.89        | 1.05        | 61.4               | 3,362,073  | 946,533   | 67.87 | 19,916 | 8,449  | 3,695  | 3,691  | 9,259  | 2,469 | 2,765 | 3,674 | 1,755 | 1,416 | 1,548 | 800   | 3,376 | 1,296 | 1,807 | 304   | 2,110 | 2,339 | 639   |     |                         |                                  |
| 東 京 都 区 部 Ku-area of Tokyo | 671                            | 386          | 2.97        | 1.36        | 57.2               | 3,999,967  | 1,055,450 | 62.58 | 19,190 | 8,627  | 2,875  | 4,102  | 8,219  | 2,102 | 2,678 | 2,665 | 1,000 | 620   | 1,006 | 653   | 2,959 | 753   | 1,137 | 289   | 1,841 | 1,780 | 773   |     |                         |                                  |
| 横 浜 市 Yokohama-shi         | 300                            | 129          | 3.04        | 1.26        | 58.1               | 3,714,437  | 998,500   | 73.68 | 21,480 | 9,956  | 4,033  | 4,016  | 9,364  | 2,965 | 3,094 | 3,800 | 1,237 | 690   | 873   | 752   | 3,055 | 1,040 | 1,319 | 287   | 2,152 | 2,619 | 814   |     |                         |                                  |
| 新 潟 市 Niigata-shi          | 62                             | 94           | 3.18        | 1.45        | 58.2               | 3,331,097  | 913,143   | 89.20 | 17,325 | 8,293  | 5,448  | 2,910  | 7,098  | 3,073 | 3,285 | 1,602 | 1,350 | 1,405 | 752   | 2,545 | 4,358 | 1,488 | 1,992 | 376   | 2,467 | 3,394 | 606   |     |                         |                                  |
| 富 山 市 Toyama-shi           | 32                             | 95           | 3.20        | 1.62        | 55.7               | 3,884,362  | 938,908   | 68.89 | 22,144 | 11,318 | 6,164  | 2,720  | 8,852  | 2,305 | 3,053 | 2,620 | 1,982 | 879   | 523   | 1,222 | 2,856 | 1,077 | 1,160 | 253   | 7,052 | 2,654 | 495   |     |                         |                                  |
| 金 沢 市 Kanazawa-shi         | 34                             | 96           | 3.24        | 1.57        | 53.8               | 3,893,213  | 943,651   | 69.76 | 22,039 | 15,277 | 2,724  | 3,222  | 8,479  | 3,204 | 2,342 | 1,230 | 1,174 | 1,188 | 431   | 2,165 | 2,639 | 1,112 | 1,103 | 406   | 3,903 | 2,044 | 556   |     |                         |                                  |
| 福 井 市 Fukui-shi            | 20                             | 95           | 3.37        | 1.68        | 57.6               | 3,445,098  | 852,421   | 93.82 | 17,321 | 9,829  | 2,902  | 2,524  | 7,433  | 2,112 | 2,528 | 920   | 618   | 556   | 689   | 1,877 | 2,652 | 847   | 668   | 139   | 2,505 | 2,243 | 743   |     |                         |                                  |
| 甲 府 市 Kofu-shi             | 16                             | 91           | 3.15        | 1.40        | 57.8               | 3,261,483  | 895,817   | 80.56 | 15,841 | 11,136 | 3,721  | 3,368  | 9,624  | 1,853 | 1,452 | 4,728 | 811   | 531   | 509   | 626   | 4,241 | 1,137 | 1,245 | 224   | 1,546 | 2,460 | 671   |     |                         |                                  |
| 長 野 市 Nagano-shi           | 31                             | 94           | 2.91        | 1.42        | 58.1               | 3,499,712  | 883,014   | 63.75 | 17,026 | 11,763 | 4,945  | 3,009  | 8,206  | 4,832 | 1,785 | 2,717 | 456   | 444   | 656   | 1,020 | 3,963 | 1,123 | 1,498 | 233   | 1,719 | 1,741 | 657   |     |                         |                                  |
| 岐 阜 市 Gifu-shi             | 32                             | 95           | 3.14        | 1.29        | 57.4               | 3,264,469  | 828,971   | 90.02 | 19,068 | 8,636  | 3,229  | 3,304  | 9,873  | 3,001 | 2,843 | 2,236 | 536   | 441   | 762   | 882   | 2,769 | 922   | 1,655 | 274   | 1,589 | 2,167 | 599   |     |                         |                                  |
| 静 岡 市 Shizuoka-shi         | 56                             | 96           | 3.08        | 1.35        | 60.8               | 3,682,165  | 957,839   | 95.63 | 21,400 | 8,551  | 3,110  | 2,752  | 8,314  | 2,561 | 2,494 | 5,405 | 1,176 | 889   | 1,905 | 3,050 | 1,381 | 1,244 | 138   | 1,608 | 2,235 | 630   |       |     |                         |                                  |
| 名 古 屋 市 Nagoya-shi         | 172                            | 106          | 3.00        | 1.33        | 58.6               | 3,678,713  | 962,435   | 79.93 | 23,179 | 11,741 | 3,048  | 2,704  | 9,638  | 3,625 | 3,115 | 2,881 | 707   | 653   | 772   | 463   | 2,390 | 1,016 | 1,934 | 439   | 1,924 | 2,040 | 698   |     |                         |                                  |
| 津 市 Tsu-shi                | 23                             | 83           | 3.13        | 1.36        | 58.6               | 3,475,233  | 871,740   | 84.66 | 20,390 | 11,989 | 3,019  | 3,057  | 9,454  | 2,991 | 2,148 | 2,903 | 1,113 | 981   | 1,202 | 531   | 2,488 | 1,244 | 1,728 | 261   | 2,268 | 1,820 | 855   |     |                         |                                  |
| 大 津 市 Otsu-shi             | 27                             | 92           | 3.04        | 1.10        | 56.2               | 3,255,439  | 872,073   | 71.82 | 24,680 | 11,157 | 3,367  | 3,410  | 9,419  | 3,912 | 2,224 | 1,347 | 578   | 878   | 661   | 1,318 | 2,699 | 889   | 1,112 | 633   | 2,466 | 1,892 | 809   |     |                         |                                  |
| 京 都 市 Kyoto-shi            | 111                            | 94           | 3.11        | 1.28        | 61.5               | 3,712,602  | 1,030,444 | 81.68 | 26,701 | 15,861 | 6,124  | 3,452  | 9,017  | 3,710 | 2,687 | 1,259 | 830   | 657   | 939   | 1,842 | 2,891 | 1,038 | 1,022 | 701   | 2,350 | 1,971 | 1,114 |     |                         |                                  |
| 大 阪 市 Osaka-shi            | 197                            | 128          | 3.10        | 1.39        | 56.0               | 3,273,759  | 917,699   | 69.71 | 23,397 | 13,465 | 3,302  | 3,128  | 9,519  | 2,690 | 2,494 | 1,612 | 953   | 562   | 793   | 1,185 | 2,577 | 1,286 | 944   | 453   | 2,156 | 1,935 | 1,171 |     |                         |                                  |
| 神 戸 市 Kobe-shi             | 123                            | 92           | 2.92        | 1.20        | 60.0               | 3,204,578  | 897,358   | 65.91 | 26,682 | 13,052 | 4,766  | 2,833  | 8,895  | 2,667 | 2,170 | 1,248 | 1,065 | 839   | 1,012 | 1,143 | 2,428 | 1,152 | 756   | 888   | 2,357 | 2,374 | 905   |     |                         |                                  |
| 奈 良 市 Nara-shi             | 30                             | 95           | 3.04        | 1.13        | 58.9               | 3,694,550  | 927,190   | 90.65 | 24,575 | 13,261 | 3,742  | 3,448  | 9,384  | 4,856 | 2,267 | 1,487 | 994   | 823   | 1,022 | 1,276 | 2,423 | 1,314 | 1,280 | 922   | 2,078 | 1,960 | 880   |     |                         |                                  |
| 和 歌 山 市 Wakayama-shi       | 30                             | 93           | 2.99        | 1.18        | 58.1               | 3,101,569  | 846,596   | 68.88 | 21,073 | 14,430 | 3,579  | 2,637  | 9,236  | 3,392 | 1,953 | 2,108 | 1,031 | 765   | 1,512 | 1,028 | 2,705 | 1,795 | 856   | 803   | 2,775 | 2,039 | 834   |     |                         |                                  |
| 鳥 取 市 Tottori-shi          | 15                             | 93           | 3.29        | 1.60        | 56.7               | 3,193,385  | 854,373   | 66.54 | 22,274 | 11,645 | 4,019  | 3,139  | 7,960  | 3,319 | 2,079 | 867   | 1,481 | 2,264 | 633   | 4,454 | 2,278 | 1,678 | 1,143 | 288   | 3,145 | 3,319 | 706   |     |                         |                                  |
| 松 江 市 Matsue-shi           | 16                             | 92           | 3.11        | 1.35        | 58.4               | 3,559,562  | 858,481   | 74.97 | 24,958 | 10,392 | 3,583  | 3,633  | 7,513  | 2,339 | 3,089 | 524   | 3,273 | 1,753 | 569   | 2,756 | 2,892 | 2,059 | 1,257 | 1,118 | 3,706 | 2,762 | 461   |     |                         |                                  |
| 岡 山 市 Okayama-shi          | 54                             | 88           | 3.11        | 1.36        | 53.8               | 3,477,486  | 820,969   | 53.71 | 21,262 | 12,939 | 3,724  | 3,329  | 10,374 | 3,082 | 1,323 | 854   | 1,095 | 403   | 887   | 1,041 | 2,527 | 1,114 | 1,122 | 929   | 3,052 | 1,985 | 933   |     |                         |                                  |
| 広 島 市 Hiroshima-shi        | 91                             | 91           | 2.88        | 1.18        | 58.9               | 3,524,295  | 899,957   | 71.90 | 19,240 | 13,457 | 5,579  | 2,374  | 8,154  | 3,044 | 1,670 | 834   | 1,356 |       |       |       |       |       |       |       |       |       |       |     |                         |                                  |

| 単位 円                  |                  |                   |               |                |                     |                      |                                       |                   |                                     |             |             |               |                   |             |                |             |                  |                  |              |              |             |               |               |                   |                   |               |                |                   |                   |                   |             | In Yen |  |
|-----------------------|------------------|-------------------|---------------|----------------|---------------------|----------------------|---------------------------------------|-------------------|-------------------------------------|-------------|-------------|---------------|-------------------|-------------|----------------|-------------|------------------|------------------|--------------|--------------|-------------|---------------|---------------|-------------------|-------------------|---------------|----------------|-------------------|-------------------|-------------------|-------------|--------|--|
| 21                    | 22               | 23                | 24            | 25             | 26                  | 27                   | 28                                    | 29                | 30                                  | 31          | 32          | 33            | 34                | 35          | 36             | 37          | 38               | 39               | 40           | 41           | 42          | 43            | 44            | 45                | 46                | 47            | 48             | 49                | 50                | 51                | 52          |        |  |
| えび                    | かに               | あさり               | しじみ           | かき(貝)          | ほたて貝                | 塩さけ                  | たらこ                                   | しらす干し             | 干しあじ                                | かつお節・干し     | 牛肉          | 豚肉            | 鶏肉                | 合いびき肉       | ハム             | ソーセージ       | ベーコン             | 牛乳               | 粉ミルク         | バター          | チーズ         | 卵             | キャベツ          | ほうれんそ             | はくさい              | ねぎ            | レタス            | ブロッコリー            | もやし               | さつまいも             | じゃがいも       |        |  |
| Shrimps & Crabs<br>1g | Short-neck<br>1g | Fresh water<br>1g | Oysters<br>1g | Scallops<br>1g | Salted salmon<br>1g | Salted pollock<br>1g | "Shirasu-boshi",<br>dried young<br>1g | Dried horse<br>1g | Bonito fillets &<br>fish flakes, 1g | Beef<br>1g  | Pork<br>1g  | Chicken<br>1g | Mixed groun<br>1g | Ham<br>1g   | Sausages<br>1g | Bacon<br>1g | Fresh milk<br>1l | Powdered m<br>1g | Butter<br>1g | Cheese<br>1g | Eggs<br>1g  | Cabbage<br>1g | Spinach<br>1g | Chinese cab<br>1g | Welsh onion<br>1g | Lettuce<br>1g | Broccoli<br>1g | Bean sprout<br>1g | Sweet potat<br>1g | White potat<br>1g |             |        |  |
| 数量<br>Quan.           | 数量<br>Quan.      | 数量<br>Quan.       | 数量<br>Quan.   | 数量<br>Quan.    | 数量<br>Quan.         | 数量<br>Quan.          | 数量<br>Quan.                           | 数量<br>Quan.       | 数量<br>Quan.                         | 数量<br>Quan. | 数量<br>Quan. | 数量<br>Quan.   | 数量<br>Quan.       | 数量<br>Quan. | 数量<br>Quan.    | 数量<br>Quan. | 数量<br>Quan.      | 数量<br>Quan.      | 数量<br>Quan.  | 数量<br>Quan.  | 数量<br>Quan. | 数量<br>Quan.   | 数量<br>Quan.   | 数量<br>Quan.       | 数量<br>Quan.       | 数量<br>Quan.   | 数量<br>Quan.    | 数量<br>Quan.       | 数量<br>Quan.       | 数量<br>Quan.       | 数量<br>Quan. |        |  |
| 1,702                 | 620              | 1,059             | 280           | 494            | 636                 | 1,652                | 792                                   | 522               | 837                                 | 274         | 6,897       | 19,464        | 15,136            | 1,850       | 3,042          | 5,524       | 1,473            | 80.33            | 302          | 504          | 2,846       | 29,926        | 17,993        | 3,358             | 8,622             | 4,962         | 6,179          | 3,693             | 6,942             | 3,034             | 10,819      |        |  |
| 1,992                 | 1,262            | 705               | 494           | 360            | 1,270               | 2,616                | 1,240                                 | 198               | 314                                 | 305         | 4,839       | 24,099        | 17,332            | 1,194       | 2,901          | 7,059       | 2,009            | 71.42            | 462          | 579          | 3,138       | 32,024        | 17,054        | 3,302             | 9,622             | 5,724         | 5,661          | 4,443             | 8,191             | 3,623             | 12,075      |        |  |
| 2,268                 | 823              | 721               | 574           | 235            | 2,693               | 4,564                | 1,540                                 | 310               | 451                                 | 189         | 5,536       | 23,755        | 14,210            | 886         | 3,198          | 7,346       | 1,929            | 69.03            | 315          | 508          | 2,552       | 34,984        | 17,658        | 4,785             | 8,986             | 5,418         | 6,644          | 5,115             | 10,546            | 3,941             | 9,012       |        |  |
| 1,217                 | 490              | 869               | 348           | 235            | 1,019               | 3,960                | 971                                   | 302               | 646                                 | 240         | 4,107       | 19,559        | 13,204            | 917         | 2,501          | 4,707       | 1,509            | 87.86            | 329          | 498          | 2,693       | 29,603        | 16,769        | 4,237             | 8,847             | 6,419         | 4,482          | 3,928             | 8,507             | 3,327             | 9,372       |        |  |
| 1,228                 | 562              | 1,110             | 337           | 792            | 751                 | 1,722                | 1,020                                 | 443               | 562                                 | 159         | 4,260       | 20,421        | 12,722            | 889         | 3,125          | 5,379       | 1,792            | 74.69            | 242          | 502          | 3,263       | 31,347        | 16,597        | 4,104             | 8,813             | 7,469         | 4,970          | 4,124             | 8,497             | 3,832             | 11,212      |        |  |
| 1,671                 | 441              | 533               | 592           | 478            | 1,163               | 3,157                | 1,587                                 | 439               | 509                                 | 172         | 4,548       | 21,656        | 15,146            | 917         | 3,113          | 4,998       | 2,027            | 78.87            | 334          | 431          | 2,481       | 28,183        | 21,147        | 5,338             | 7,840             | 6,878         | 5,751          | 4,228             | 9,023             | 4,402             | 9,347       |        |  |
| 1,098                 | 345              | 752               | 192           | 309            | 1,126               | 2,319                | 1,424                                 | 301               | 426                                 | 264         | 9,450       | 19,626        | 12,856            | 1,251       | 2,648          | 5,368       | 1,844            | 91.82            | 80           | 476          | 2,984       | 31,623        | 18,250        | 4,670             | 5,289             | 5,467         | 4,816          | 4,115             | 8,811             | 2,966             | 9,343       |        |  |
| 1,123                 | 244              | 922               | 331           | 439            | 552                 | 2,234                | 1,094                                 | 523               | 522                                 | 135         | 4,070       | 19,386        | 11,379            | 635         | 3,026          | 5,513       | 1,400            | 69.02            | 171          | 386          | 2,658       | 30,139        | 17,941        | 3,505             | 8,206             | 5,285         | 4,536          | 3,863             | 8,904             | 2,918             | 10,850      |        |  |
| 1,148                 | 344              | 809               | 775           | 297            | 350                 | 2,436                | 855                                   | 729               | 974                                 | 188         | 4,005       | 18,509        | 11,066            | 1,125       | 3,787          | 4,893       | 1,356            | 80.28            | 459          | 441          | 3,278       | 25,954        | 17,208        | 3,810             | 7,152             | 6,026         | 6,440          | 4,459             | 5,774             | 3,376             | 8,405       |        |  |
| 957                   | 444              | 721               | 368           | 306            | 501                 | 1,410                | 875                                   | 487               | 737                                 | 149         | 3,693       | 18,867        | 13,300            | 1,194       | 3,081          | 5,336       | 1,764            | 75.42            | 599          | 370          | 2,851       | 29,486        | 18,492        | 3,180             | 7,640             | 4,951         | 6,144          | 3,485             | 7,477             | 3,019             | 9,843       |        |  |
| 871                   | 430              | 1,033             | 205           | 307            | 452                 | 2,055                | 848                                   | 411               | 933                                 | 247         | 3,478       | 16,625        | 10,701            | 1,074       | 2,491          | 5,226       | 1,197            | 68.26            | 270          | 412          | 2,746       | 23,301        | 18,345        | 2,778             | 5,113             | 5,018         | 6,194          | 3,371             | 6,316             | 2,735             | 10,663      |        |  |
| 1,117                 | 294              | 1,282             | 306           | 387            | 511                 | 1,668                | 937                                   | 560               | 1,231                               | 186         | 6,288       | 21,116        | 15,931            | 1,516       | 3,381          | 5,378       | 1,684            | 86.61            | 233          | 592          | 3,239       | 27,273        | 20,206        | 3,574             | 8,559             | 7,238         | 7,244          | 4,304             | 6,804             | 2,461             | 12,479      |        |  |
| 1,476                 | 600              | 1,713             | 322           | 451            | 684                 | 1,908                | 1,109                                 | 707               | 1,467                               | 449         | 6,030       | 18,985        | 14,745            | 1,451       | 3,166          | 5,067       | 1,615            | 97.54            | 546          | 635          | 3,402       | 29,636        | 21,239        | 3,864             | 9,319             | 6,500         | 8,223          | 4,410             | 7,139             | 4,805             | 12,428      |        |  |
| 1,308                 | 495              | 1,273             | 388           | 466            | 508                 | 1,666                | 735                                   | 693               | 1,114                               | 211         | 6,358       | 19,191        | 14,352            | 1,638       | 3,104          | 5,089       | 1,489            | 81.94            | 386          | 675          | 3,637       | 25,362        | 17,910        | 3,797             | 8,542             | 6,308         | 7,208          | 4,903             | 6,882             | 2,878             | 11,547      |        |  |
| 1,766                 | 585              | 1,387             | 344           | 409            | 688                 | 1,374                | 847                                   | 764               | 1,145                               | 238         | 6,945       | 23,008        | 15,647            | 1,751       | 3,778          | 5,150       | 1,767            | 83.81            | 457          | 728          | 3,744       | 27,380        | 18,862        | 3,604             | 8,538             | 6,506         | 8,629          | 4,695             | 7,909             | 3,323             | 12,091      |        |  |
| 2,272                 | 1,687            | 1,280             | 434           | 452            | 1,081               | 4,696                | 1,422                                 | 391               | 677                                 | 219         | 3,337       | 23,249        | 13,469            | 961         | 2,998          | 5,946       | 1,647            | 76.98            | 659          | 350          | 2,800       | 32,321        | 18,340        | 3,897             | 7,313             | 6,719         | 6,189          | 4,709             | 8,702             | 4,004             | 13,746      |        |  |
| 1,802                 | 758              | 836               | 361           | 253            | 396                 | 2,850                | 1,111                                 | 434               | 694                                 | 126         | 6,307       | 19,836        | 11,214            | 2,558       | 4,333          | 6,193       | 1,692            | 88.28            | 148          | 452          | 2,818       | 31,110        | 19,117        | 3,884             | 9,315             | 4,847         | 5,298          | 3,635             | 8,738             | 2,954             | 12,198      |        |  |
| 1,614                 | 1,492            | 1,048             | 205           | 489            | 301                 | 1,285                | 614                                   | 414               | 694                                 | 101         | 6,695       | 17,732        | 13,462            | 2,396       | 2,957          | 5,862       | 1,311            | 83.35            | 146          | 390          | 2,988       | 31,395        | 15,994        | 2,901             | 9,109             | 4,493         | 5,161          | 4,439             | 8,527             | 3,432             | 10,462      |        |  |
| 1,039                 | 1,864            | 818               | 356           | 292            | 295                 | 1,195                | 770                                   | 338               | 506                                 | 125         | 7,195       | 15,160        | 11,495            | 2,249       | 3,212          | 6,184       | 1,143            | 75.00            | 463          | 355          | 2,191       | 34,458        | 15,566        | 3,254             | 6,571             | 3,667         | 4,526          | 2,667             | 7,144             | 1,733             | 11,769      |        |  |
| 1,154                 | 338              | 1,635             | 662           | 398            | 633                 | 1,870                | 818                                   | 778               | 1,742                               | 290         | 5,929       | 22,597        | 14,558            | 1,039       | 3,333          | 5,509       | 1,552            | 73.89            | 248          | 455          | 2,772       | 26,277        | 20,607        | 3,874             | 9,808             | 4,760         | 7,050          | 3,714             | 8,028             | 3,041             | 11,003      |        |  |
| 1,150                 | 442              | 1,343             | 233           | 264            | 755                 | 2,214                | 1,149                                 | 627               | 701                                 | 182         | 3,365       | 17,706        | 11,949            | 1,073       | 2,673          | 5,717       | 1,594            | 79.45            | 419          | 465          | 3,120       | 28,303        | 22,672        | 3,314             | 7,918             | 4,034         | 6,135          | 4,270             | 6,172             | 2,962             | 7,562       |        |  |
| 1,406                 | 678              | 959               | 177           | 484            | 471                 | 1,138                | 478                                   | 472               | 852                                 | 315         | 5,660       | 18,205        | 13,159            | 1,713       | 3,315          | 5,757       | 1,351            | 78.81            | 278          | 424          | 2,423       | 30,891        | 16,552        | 2,790             | 7,811             | 4,196         | 4,786          | 2,876             | 7,181             | 2,825             | 9,717       |        |  |
| 1,468                 | 1,085            | 1,177             | 425           | 490            | 705                 | 2,003                | 587                                   | 2,436             | 1,766                               | 532         | 5,133       | 22,383        | 13,295            | 1,919       | 3,008          | 5,117       | 1,461            | 94.80            | 289          | 567          | 3,147       | 27,743        | 19,302        | 3,384             | 8,608             | 6,057         | 7,059          | 4,088             | 6,150             | 5,057             | 13,774      |        |  |
| 2,013                 | 424              | 1,354             | 148           | 522            | 886                 | 1,074                | 682                                   | 473               | 800                                 | 316         | 6,688       | 18,466        | 14,444            | 2,132       | 3,355          | 5,037       | 1,200            | 80.88            | 85           | 632          | 2,896       | 29,824        | 16,826        | 3,178             | 8,518             | 5,581         | 5,555          | 4,107             | 6,601             | 3,374             | 11,206      |        |  |
| 1,970                 | 329              | 1,054             | 81            | 598            | 529                 | 1,625                | 406                                   | 319               | 799                                 | 268         | 8,207       | 15,928        | 15,520            | 2,383       | 2,699          | 5,877       | 1,101            | 87.27            | 0            | 514          | 2,836       | 35,235        | 15,951        | 2,583             | 7,661             | 3,818         | 5,430          | 3,616             | 5,720             | 3,153             | 9,727       |        |  |
| 1,725                 | 344              | 1,032             | 245           | 330            | 257                 | 1,518                | 510                                   | 510               | 815                                 | 211         | 9,037       | 17,463        | 15,790            | 2,470       | 3,010          | 5,009       | 1,288            | 88.60            | 237          | 555          | 3,034       | 28,946        | 15,129        | 3,261             | 9,290             | 3,981         | 5,421          | 4,131             | 5,757             | 2,539             | 11,210      |        |  |
| 2,249                 | 882              | 1,106             | 416           | 914            | 447                 | 1,210                | 863                                   | 877               | 609                                 | 276         | 11,689      | 17,571        | 15,974            | 2,620       | 3,515          | 4,660       | 1,364            | 92.63            | 369          | 705          | 3,269       | 32,299        | 19,367        | 4,337             | 11,846            | 5,351         | 6,389          | 4,082             | 5,417             | 3,643             | 13,815      |        |  |
| 2,074                 | 451              | 801               | 129           | 578            | 373                 | 1,183                | 782                                   | 681               | 435                                 | 280         | 11,290      | 18,329        | 17,127            | 2,800       | 2,831          | 5,419       | 1,220            | 84.38            | 167          | 605          | 2,629       | 32,802        | 17,419        | 4,344             | 11,062            | 4,870         | 5,947          | 3,315             | 5,544             | 3,097             | 12,450      |        |  |
| 1,689                 | 589              | 668               | 81            | 1,002          | 409                 | 1,021                | 542                                   | 308               | 362                                 | 350         | 9,142       | 15,835        | 14,925            | 1,940       | 3,313          | 4,505       | 1,071            |                  |              |              |             |               |               |                   |                   |               |                |                   |                   |                   |             |        |  |

| 53          | 54             | 55            | 56             | 57           | 58                | 59                  | 60                 | 61             | 62              | 63              | 64             | 65                  | 66                                               | 67                                               | 68                                  | 69                 | 70                         | 71                                | 72                   | 73                            | 74                                    | 75           | 76                     | 77                | 78            | 79          | 80           | 81               | 82            | 83               | 84           |
|-------------|----------------|---------------|----------------|--------------|-------------------|---------------------|--------------------|----------------|-----------------|-----------------|----------------|---------------------|--------------------------------------------------|--------------------------------------------------|-------------------------------------|--------------------|----------------------------|-----------------------------------|----------------------|-------------------------------|---------------------------------------|--------------|------------------------|-------------------|---------------|-------------|--------------|------------------|---------------|------------------|--------------|
| さといも        | だいこん           | にんじん          | ごぼう            | たまねぎ         | れんこん              | たけのこ                | さやまめ               | かぼちゃ           | きゅうり            | なす              | トマト            | ピーマン                | 生しいたけ                                            | 干しいたけ                                            | わかめ                                 | こんぶ                | 豆腐                         | 梅干し                               | だいこん漬                | はくさい漬                         | こんぶつくだり                               | りんご          | みかん                    | グレープフルーツ          | オレンジ          | 梨           | ぶどう          | 柿                | 桃             | すいか              | メロン          |
| Taros<br>1g | Radishes<br>1g | Carrots<br>1g | Burdocks<br>1g | Onions<br>1g | Lotus roots<br>1g | Bamboo shoots<br>1g | String beans<br>1g | Pumpkins<br>1g | Cucumbers<br>1g | Eggplants<br>1g | Tomatoes<br>1g | Green peppers<br>1g | "Shiitake",<br>Japanese mushrooms<br>fresh<br>1g | "Shiitake",<br>Japanese mushrooms<br>dried<br>1g | "Wakame",<br>Japanese seaweed<br>1g | Dried tangle<br>1g | Bean curd<br>1T each<br>1g | "Umeboshi",<br>pickled plum<br>1g | Pickled radish<br>1g | Pickled chinese cabbage<br>1g | Tangle prepared<br>in soy sauce<br>1g | Apples<br>1g | Mandarin oranges<br>1g | Grapefruits<br>1g | Oranges<br>1g | Pears<br>1g | Grapes<br>1g | Persimmons<br>1g | Peaches<br>1g | Watermelon<br>1g | Melons<br>1g |
| 数量<br>Quan. | 数量<br>Quan.    | 数量<br>Quan.   | 数量<br>Quan.    | 数量<br>Quan.  | 数量<br>Quan.       | 数量<br>Quan.         | 数量<br>Quan.        | 数量<br>Quan.    | 数量<br>Quan.     | 数量<br>Quan.     | 数量<br>Quan.    | 数量<br>Quan.         | 数量<br>Quan.                                      | 数量<br>Quan.                                      | 数量<br>Quan.                         | 数量<br>Quan.        | 数量<br>Quan.                | 数量<br>Quan.                       | 数量<br>Quan.          | 数量<br>Quan.                   | 数量<br>Quan.                           | 数量<br>Quan.  | 数量<br>Quan.            | 数量<br>Quan.       | 数量<br>Quan.   | 数量<br>Quan. | 数量<br>Quan.  | 数量<br>Quan.      | 数量<br>Quan.   | 数量<br>Quan.      | 数量<br>Quan.  |
| 2,086       | 13,534         | 8,630         | 2,037          | 16,095       | 1,560             | 913                 | 2,224              | 4,461          | 8,358           | 4,505           | 12,185         | 2,667               | 1,611                                            | 66                                               | 874                                 | 337                | 79.82                      | 754                               | 1,521                | 837                           | 623                                   | 13,315       | 12,290                 | 1,741             | 1,758         | 4,008       | 2,506        | 2,747            | 1,634         | 4,132            | 2,174        |
| 714         | 15,148         | 8,355         | 2,300          | 21,180       | 859               | 712                 | 1,495              | 4,604          | 7,391           | 4,360           | 10,318         | 3,121               | 2,032                                            | 68                                               | 571                                 | 381                | 60.87                      | 1,062                             | 1,763                | 394                           | 496                                   | 11,039       | 12,030                 | 2,550             | 1,393         | 1,895       | 2,273        | 3,589            | 1,032         | 4,055            | 4,874        |
| 633         | 16,005         | 10,368        | 2,681          | 22,724       | 891               | 742                 | 2,489              | 4,294          | 7,990           | 6,475           | 15,084         | 2,836               | 1,902                                            | 43                                               | 1,626                               | 736                | 99.54                      | 1,128                             | 2,124                | 1,125                         | 681                                   | 35,056       | 10,426                 | 1,417             | 1,980         | 2,222       | 1,760        | 2,997            | 1,031         | 4,272            | 4,067        |
| 2,180       | 19,666         | 10,299        | 2,914          | 17,280       | 948               | 494                 | 1,844              | 4,396          | 7,416           | 4,313           | 10,704         | 2,712               | 1,871                                            | 116                                              | 1,680                               | 504                | 93.66                      | 990                               | 1,698                | 1,037                         | 672                                   | 28,605       | 12,604                 | 2,000             | 1,817         | 3,426       | 2,882        | 2,291            | 1,743         | 3,472            | 2,452        |
| 2,328       | 19,821         | 9,495         | 2,463          | 17,213       | 1,516             | 1,076               | 2,496              | 5,026          | 9,368           | 5,285           | 13,385         | 3,014               | 1,564                                            | 61                                               | 1,581                               | 579                | 84.29                      | 687                               | 1,756                | 1,137                         | 564                                   | 14,830       | 14,457                 | 3,077             | 1,903         | 6,117       | 2,362        | 3,456            | 2,828         | 3,214            | 2,123        |
| 1,768       | 15,421         | 8,792         | 2,184          | 17,580       | 921               | 775                 | 3,754              | 4,272          | 8,808           | 6,230           | 14,187         | 2,344               | 2,516                                            | 61                                               | 1,474                               | 476                | 80.91                      | 864                               | 2,368                | 439                           | 503                                   | 21,591       | 14,444                 | 3,097             | 1,772         | 6,339       | 3,294        | 3,513            | 1,648         | 5,088            | 3,884        |
| 3,345       | 13,269         | 8,480         | 2,432          | 15,846       | 871               | 2,498               | 2,184              | 4,783          | 11,657          | 4,953           | 10,971         | 2,247               | 1,453                                            | 52                                               | 994                                 | 688                | 90.17                      | 665                               | 1,401                | 635                           | 877                                   | 20,719       | 9,825                  | 2,011             | 2,164         | 11,246      | 3,212        | 2,556            | 1,828         | 6,179            | 1,677        |
| 2,456       | 15,896         | 10,656        | 2,424          | 15,138       | 1,001             | 934                 | 2,147              | 3,895          | 10,699          | 4,566           | 9,818          | 2,273               | 1,509                                            | 26                                               | 1,229                               | 605                | 78.68                      | 1,307                             | 2,052                | 989                           | 797                                   | 18,988       | 11,251                 | 1,002             | 1,342         | 7,353       | 2,053        | 2,229            | 7,564         | 2,840            | 1,144        |
| 2,508       | 15,685         | 8,297         | 1,929          | 15,576       | 2,677             | 341                 | 1,740              | 4,185          | 8,573           | 3,549           | 11,268         | 2,565               | 1,398                                            | 28                                               | 884                                 | 212                | 69.36                      | 706                               | 1,499                | 798                           | 521                                   | 12,103       | 14,011                 | 2,228             | 2,694         | 6,859       | 2,831        | 2,275            | 1,953         | 4,683            | 6,094        |
| 2,303       | 17,194         | 9,428         | 2,198          | 16,104       | 1,165             | 717                 | 1,560              | 4,680          | 8,597           | 4,874           | 10,445         | 2,460               | 1,589                                            | 23                                               | 1,077                               | 294                | 86.09                      | 1,283                             | 1,683                | 819                           | 929                                   | 8,323        | 13,564                 | 2,888             | 1,696         | 5,073       | 2,010        | 2,065            | 1,458         | 3,215            | 2,165        |
| 1,945       | 11,414         | 8,051         | 1,526          | 11,966       | 1,114             | 499                 | 1,956              | 4,395          | 10,364          | 3,740           | 14,041         | 2,507               | 1,394                                            | 23                                               | 631                                 | 254                | 86.40                      | 859                               | 1,334                | 703                           | 617                                   | 16,152       | 11,718                 | 3,416             | 1,511         | 4,980       | 2,323        | 1,021            | 1,251         | 4,324            | 1,322        |
| 2,265       | 15,301         | 9,363         | 1,864          | 18,207       | 1,515             | 796                 | 2,430              | 5,643          | 9,619           | 5,006           | 15,726         | 3,349               | 1,580                                            | 39                                               | 957                                 | 237                | 80.70                      | 671                               | 952                  | 764                           | 693                                   | 10,034       | 12,173                 | 1,905             | 1,508         | 4,130       | 1,365        | 2,002            | 1,256         | 4,852            | 1,302        |
| 2,610       | 17,347         | 9,184         | 1,995          | 17,353       | 1,905             | 1,099               | 3,624              | 5,483          | 9,092           | 5,362           | 16,627         | 3,053               | 1,581                                            | 82                                               | 987                                 | 453                | 80.17                      | 1,434                             | 1,902                | 1,150                         | 789                                   | 11,394       | 14,237                 | 3,684             | 2,819         | 4,485       | 3,492        | 3,603            | 2,727         | 7,906            | 4,102        |
| 2,175       | 15,337         | 8,720         | 1,753          | 15,555       | 1,648             | 1,153               | 3,803              | 4,534          | 9,424           | 5,166           | 15,041         | 2,968               | 1,420                                            | 68                                               | 806                                 | 277                | 76.46                      | 984                               | 1,518                | 1,077                         | 567                                   | 10,898       | 11,347                 | 2,497             | 1,641         | 3,680       | 2,065        | 2,513            | 2,475         | 5,783            | 2,436        |
| 2,125       | 15,838         | 9,447         | 1,927          | 18,006       | 1,851             | 1,929               | 3,508              | 6,016          | 11,171          | 6,460           | 15,847         | 3,431               | 1,545                                            | 74                                               | 722                                 | 233                | 82.28                      | 797                               | 1,470                | 786                           | 592                                   | 11,779       | 9,785                  | 3,058             | 1,663         | 3,061       | 2,390        | 2,616            | 1,700         | 4,761            | 2,175        |
| 3,844       | 17,860         | 11,179        | 1,937          | 17,917       | 2,771             | 1,602               | 7,182              | 5,280          | 10,171          | 6,660           | 17,306         | 2,478               | 1,530                                            | 73                                               | 833                                 | 394                | 96.51                      | 521                               | 1,767                | 938                           | 923                                   | 18,119       | 15,050                 | 3,406             | 1,817         | 11,844      | 1,892        | 2,902            | 1,972         | 7,883            | 3,399        |
| 2,689       | 14,149         | 8,136         | 1,868          | 15,173       | 1,306             | 1,402               | 1,816              | 5,016          | 8,064           | 5,302           | 12,840         | 2,520               | 2,201                                            | 48                                               | 843                                 | 561                | 89.56                      | 470                               | 2,071                | 1,602                         | 868                                   | 13,539       | 13,096                 | 1,975             | 3,507         | 6,225       | 1,927        | 1,934            | 987           | 5,257            | 1,994        |
| 1,837       | 15,385         | 9,061         | 1,481          | 15,123       | 2,066             | 1,280               | 2,006              | 4,797          | 8,345           | 3,538           | 12,823         | 2,543               | 1,772                                            | 52                                               | 852                                 | 371                | 85.10                      | 566                               | 1,776                | 928                           | 838                                   | 10,710       | 12,448                 | 1,226             | 1,443         | 5,190       | 2,514        | 1,714            | 1,235         | 5,078            | 1,585        |
| 2,704       | 12,222         | 7,338         | 1,291          | 14,527       | 751               | 838                 | 1,692              | 3,443          | 6,413           | 3,664           | 9,975          | 1,952               | 1,462                                            | 44                                               | 1,064                               | 456                | 65.75                      | 554                               | 1,487                | 722                           | 1,006                                 | 9,178        | 12,206                 | 517               | 2,250         | 2,335       | 1,547        | 1,199            | 655           | 4,466            | 1,749        |
| 1,757       | 18,549         | 9,259         | 2,397          | 14,644       | 1,793             | 814                 | 1,895              | 5,146          | 11,267          | 3,533           | 12,772         | 2,758               | 1,518                                            | 71                                               | 1,200                               | 271                | 84.97                      | 664                               | 1,195                | 870                           | 607                                   | 10,890       | 13,286                 | 1,377             | 2,439         | 2,850       | 5,572        | 2,385            | 4,647         | 3,182            | 1,303        |
| 1,888       | 13,198         | 8,446         | 1,985          | 15,811       | 1,864             | 1,438               | 1,911              | 3,944          | 10,299          | 3,789           | 13,864         | 2,517               | 1,300                                            | 41                                               | 1,145                               | 416                | 65.49                      | 396                               | 1,800                | 719                           | 706                                   | 30,103       | 13,315                 | 1,478             | 1,639         | 3,988       | 5,511        | 1,225            | 7,279         | 4,265            | 1,922        |
| 2,809       | 12,052         | 7,660         | 1,810          | 13,856       | 1,639             | 511                 | 2,049              | 4,072          | 5,762           | 4,080           | 8,986          | 2,175               | 1,612                                            | 87                                               | 798                                 | 244                | 84.34                      | 662                               | 1,692                | 584                           | 748                                   | 9,753        | 8,593                  | 943               | 1,924         | 2,620       | 2,010        | 6,145            | 686           | 3,020            | 1,050        |
| 3,106       | 15,678         | 9,747         | 1,918          | 16,310       | 2,430             | 911                 | 3,098              | 6,373          | 8,988           | 4,756           | 13,074         | 3,258               | 1,904                                            | 71                                               | 1,100                               | 302                | 94.42                      | 703                               | 1,829                | 1,165                         | 948                                   | 12,021       | 23,798                 | 897               | 1,544         | 4,613       | 2,441        | 3,062            | 1,256         | 4,191            | 1,811        |
| 3,447       | 13,538         | 8,293         | 1,921          | 16,089       | 1,817             | 595                 | 2,426              | 4,610          | 7,870           | 5,124           | 12,774         | 2,572               | 1,281                                            | 80                                               | 470                                 | 187                | 85.58                      | 645                               | 1,536                | 495                           | 531                                   | 11,179       | 9,670                  | 1,311             | 3,076         | 2,790       | 2,691        | 2,846            | 1,214         | 7,540            | 2,420        |
| 2,081       | 12,220         | 8,406         | 1,955          | 14,882       | 1,461             | 839                 | 1,709              | 3,626          | 7,796           | 3,743           | 12,298         | 2,591               | 1,581                                            | 58                                               | 488                                 | 259                | 73.27                      | 581                               | 1,863                | 708                           | 568                                   | 9,779        | 13,385                 | 1,361             | 2,201         | 5,986       | 1,907        | 2,616            | 1,089         | 4,087            | 1,420        |
| 1,950       | 11,601         | 8,389         | 1,292          | 16,559       | 1,000             | 696                 | 1,937              | 4,808          | 6,480           | 5,149           | 11,250         | 2,424               | 1,601                                            | 56                                               | 490                                 | 181                | 71.77                      | 858                               | 1,236                | 841                           | 1,029                                 | 10,069       | 8,624                  | 1,309             | 1,641         | 3,804       | 1,959        | 2,091            | 1,232         | 2,259            | 1,617        |
| 2,508       | 16,373         | 8,048         | 1,775          | 19,581       | 1,312             | 1,476               | 2,454              | 5,197          | 7,938           | 6,747           | 13,829         | 3,102               | 1,986                                            | 65                                               | 587                                 | 410                | 76.54                      | 823                               | 1,535                | 804                           | 716                                   | 9,887        | 13,578                 | 1,287             | 1,221         | 2,218       | 2,816        | 2,616            | 1,093         | 4,515            | 1,268        |
| 1,875       | 13,124         | 8,037         | 1,798          | 19,618       | 1,818             | 764                 | 2,165              | 4,533          | 6,909           | 4,946           | 10,293         | 2,792               | 1,719                                            | 56                                               | 468                                 | 298                | 74.63                      | 751                               | 1,078                | 633                           | 718                                   | 9,053        | 8,426                  | 1,329             | 1,835         | 2,224       | 1,863        | 2,823            | 1,420         | 4,458            | 1,659        |
| 1,659       | 11,512         | 7,628         | 1,811          | 14,732       | 1,389             | 763                 | 1,867              | 4,524          | 6,129           | 4,693           | 11,329         | 2,750               | 1,870                                            | 34                                               | 939                                 | 179                | 71.41                      | 714                               | 1,485                | 655                           | 679                                   | 12,811       | 11,177                 | 1,659             | 1,573         | 3,446       | 2,446        | 3,620            | 1,063         | 2,909            | 859          |
| 2,120       | 13,776         | 8,968         | 2,122          | 18,099       | 1,519             | 1,004               | 1,926              | 4,919          | 7,140           | 5,333           | 11,671         | 2,802               | 1,750                                            | 69                                               | 620                                 | 358                | 75.54                      | 631                               | 2,125                | 720                           | 803                                   | 13,589       | 12,338                 | 1,824             | 1,511         | 3,330       | 2,350        | 5,922            | 1,972         | 3,604            | 1,783        |
| 1,747       | 11,943         | 7,402         | 1,848          | 14,610       | 1,034             | 486                 | 2,144              | 4,640          | 6,905           | 4,673           | 9,349          | 2,094               | 1,756                                            | 68                                               | 819                                 | 362                | 72.85                      | 1,867                             | 1,087                | 601                           | 649                                   | 11,206       | 11,718                 | 660               | 2,021         | 2,775       | 2,380        | 3,394            | 3,687         | 4,187            | 1,564        |
| 1,442       | 11,820         | 7,530         | 1,589          | 14,041       | 629               | 473                 | 1,432              | 4,462          | 5,425           | 4,185           | 8,711          | 2,588               | 2,108                                            | 35                                               | 967                                 | 295                | 84.14                      | 763                               | 1,652                | 2,261                         | 829                                   | 15,245       | 13,779                 | 2,038             | 2,612         | 13,137      | 2,106        | 6,482            | 887           | 7,261            | 3,123        |
| 1,896       | 10,604         | 9,292         | 2,272          | 17,199       | 692               | 423                 | 1,436              | 4,579          | 6,747           | 4,135           | 8,969          | 2,725               | 1,687                                            | 69                                               | 1,379                               | 450                | 83.98                      | 814                               | 1,909                | 677                           | 607                                   | 10,551       | 14,800                 | 618               | 2,227         | 7,722       | 2,892        | 2,436            | 749           | 4,024            | 1,329        |
| 1,028       | 9,726          | 7,221         | 2,095          | 14,402       | 1,671             | 799                 | 1,353              | 3,949          | 6,135           | 3,010           | 8,916          | 2,346               | 1,327                                            | 41                                               | 483                                 | 280                | 77.15                      | 834                               | 1,263                | 647                           | 364                                   | 8,857        | 11,220                 | 1,060             | 1,856         | 2,998       | 4,381        | 2,909            | 4,836         | 4,591            | 1,188        |
| 2,361       | 12,819         | 9,263         | 2,545          | 14,996       | 2,566             | 578                 | 2,250              | 5,965          | 8,114           | 4,865           | 10,766         | 2,505               | 1,737                                            | 53                                               | 530                                 | 300                | 83.88                      | 806                               | 1,389                | 1,473                         | 463                                   | 13,032       | 14,270                 | 798               | 2,623         | 3,214       | 2,777        | 2,050            | 1,022         | 4,642            | 1,284        |
| 1,757       | 11,357         | 8,654         | 2,745          | 13,621       | 1,612             | 930                 | 1,766              | 5,209          | 7,311           | 4,426           | 9,103          | 2,516               | 1,588                                            | 37                                               | 622                                 | 309</              |                            |                                   |                      |                               |                                       |              |                        |                   |               |             |              |                  |               |                  |              |

| 85               | 86            | 87                | 88               | 89              | 90          | 91               | 92                | 93          | 94             | 95               | 96               | 97                                            | 98                   | 99          | 100               | 101             | 102             | 103          | 104           | 105                                | 106         | 107           | 108         | 109                                                           |
|------------------|---------------|-------------------|------------------|-----------------|-------------|------------------|-------------------|-------------|----------------|------------------|------------------|-----------------------------------------------|----------------------|-------------|-------------------|-----------------|-----------------|--------------|---------------|------------------------------------|-------------|---------------|-------------|---------------------------------------------------------------|
| いちご              | バナナ           | キウイフルーツ           | 食用油              | マーガリン           | 食塩          | しょう油             | みそ                | 砂糖          | 酢              | ソース              | ケチャップ            | マヨネーズ<br>マヨネーズ風味調味料                           | ドレッシング<br>マヨネーズ風味調味料 | ジャム         | カレールウ             | 緑茶              | 紅茶              | コーヒー         | 清酒            | 焼酎                                 | ビール         | ウイスキー         | ワイン         | 発泡酒・<br>ビール風味<br>アルコール飲料                                      |
| Strawberry<br>1g | Bananas<br>1g | Kiwi fruits<br>1g | Edible oil<br>1g | Margarine<br>1g | Salt<br>1g  | Soy sauce<br>1ml | "Miso", soy<br>1g | Sugar<br>1g | Vinegar<br>1ml | Worcester<br>1ml | Tomato ket<br>1g | Mayonnaise &<br>mayonnaise<br>seasoning<br>1g | Dressing<br>1ml      | Jam         | Instant cur<br>1g | Green tea<br>1g | Black tea<br>1g | Coffee<br>1g | "Sake"<br>1ml | "Shochu",<br>distilled spir<br>1ml | Beer<br>1l  | Whisky<br>1ml | Wine<br>1ml | Low-malt beer &<br>beer-flavored<br>alcoholic beverages<br>1l |
| 数量<br>Quan.      | 数量<br>Quan.   | 数量<br>Quan.       | 数量<br>Quan.      | 数量<br>Quan.     | 数量<br>Quan. | 数量<br>Quan.      | 数量<br>Quan.       | 数量<br>Quan. | 数量<br>Quan.    | 数量<br>Quan.      | 数量<br>Quan.      | 数量<br>Quan.                                   | 数量<br>Quan.          | 数量<br>Quan. | 数量<br>Quan.       | 数量<br>Quan.     | 数量<br>Quan.     | 数量<br>Quan.  | 数量<br>Quan.   | 数量<br>Quan.                        | 数量<br>Quan. | 数量<br>Quan.   | 数量<br>Quan. | 数量<br>Quan.                                                   |
| 2,794            | 18,235        | 1,588             | 8,324            | 1,231           | 2,196       | 5,934            | 5,868             | 5,959       | 2,439          | 1,522            | 1,619            | 2,584                                         | 2,294                | 1,283       | 1,566             | 874             | 227             | 2,318        | 7,443         | 10,115                             | 22,55       | 1,033         | 3,315       | 30.98                                                         |
| 2,275            | 15,435        | 1,981             | 10,858           | 978             | 2,610       | 5,465            | 6,411             | 6,264       | 3,005          | 1,210            | 1,838            | 2,931                                         | 1,982                | 959         | 1,543             | 892             | 217             | 2,943        | 7,373         | 16,017                             | 29.69       | 2,991         | 5,089       | 35.24                                                         |
| 1,915            | 22,231        | 1,926             | 10,177           | 1,294           | 3,280       | 5,928            | 7,608             | 5,951       | 3,114          | 1,693            | 1,763            | 2,953                                         | 2,260                | 1,450       | 1,900             | 542             | 202             | 2,579        | 6,441         | 15,904                             | 19.36       | 3,165         | 2,854       | 38.92                                                         |
| 3,440            | 19,691        | 1,365             | 6,862            | 1,163           | 4,073       | 5,695            | 7,408             | 3,665       | 2,028          | 954              | 1,467            | 2,117                                         | 2,116                | 1,264       | 1,674             | 594             | 247             | 2,695        | 8,014         | 14,667                             | 18.03       | 1,948         | 3,179       | 39.15                                                         |
| 3,608            | 18,496        | 2,115             | 7,237            | 982             | 3,405       | 4,456            | 7,157             | 4,815       | 2,077          | 1,000            | 1,373            | 2,087                                         | 2,236                | 1,276       | 1,385             | 1,135           | 279             | 2,247        | 9,812         | 9,066                              | 27.67       | 1,309         | 3,409       | 41.57                                                         |
| 2,550            | 16,992        | 1,673             | 9,989            | 919             | 3,751       | 6,329            | 9,487             | 7,336       | 2,426          | 1,297            | 1,096            | 2,606                                         | 2,055                | 838         | 1,705             | 800             | 208             | 2,199        | 12,163        | 14,629                             | 25.56       | 1,295         | 2,932       | 33.85                                                         |
| 2,363            | 16,976        | 1,232             | 8,561            | 791             | 5,117       | 9,705            | 6,686             | 6,838       | 2,725          | 1,588            | 1,373            | 2,675                                         | 2,296                | 1,256       | 1,668             | 554             | 241             | 2,703        | 7,347         | 10,824                             | 20.64       | 1,245         | 3,426       | 44.79                                                         |
| 2,637            | 15,519        | 1,246             | 8,572            | 812             | 2,988       | 5,437            | 6,067             | 4,519       | 2,364          | 1,326            | 1,273            | 2,837                                         | 2,210                | 1,022       | 1,493             | 538             | 181             | 1,876        | 11,419        | 10,317                             | 15.57       | 1,048         | 2,565       | 36.80                                                         |
| 2,938            | 21,660        | 1,535             | 8,697            | 740             | 1,702       | 5,788            | 5,589             | 5,305       | 1,943          | 920              | 1,604            | 2,252                                         | 2,469                | 1,632       | 1,526             | 839             | 184             | 2,226        | 6,337         | 6,142                              | 19.73       | 725           | 2,369       | 27.41                                                         |
| 4,590            | 16,757        | 1,029             | 7,954            | 1,074           | 919         | 6,041            | 4,423             | 4,820       | 1,623          | 1,309            | 1,552            | 2,381                                         | 2,468                | 1,250       | 1,524             | 1,062           | 120             | 2,483        | 7,866         | 11,922                             | 16.10       | 1,214         | 3,587       | 37.18                                                         |
| 3,021            | 19,052        | 1,708             | 7,207            | 892             | 1,677       | 5,494            | 3,974             | 4,045       | 2,355          | 1,260            | 1,570            | 2,222                                         | 2,364                | 1,353       | 1,593             | 852             | 159             | 2,193        | 9,979         | 6,529                              | 18.53       | 1,153         | 4,862       | 30.53                                                         |
| 2,754            | 15,238        | 1,706             | 8,243            | 1,341           | 1,526       | 6,855            | 5,998             | 4,166       | 1,936          | 1,213            | 1,568            | 2,302                                         | 2,771                | 1,179       | 1,406             | 765             | 175             | 2,760        | 7,569         | 8,285                              | 26.52       | 1,690         | 2,221       | 36.18                                                         |
| 2,918            | 18,906        | 1,737             | 7,960            | 1,307           | 1,929       | 6,948            | 5,599             | 6,571       | 2,296          | 1,432            | 1,572            | 2,411                                         | 2,350                | 1,521       | 1,364             | 1,048           | 285             | 2,498        | 7,372         | 8,889                              | 21.56       | 1,123         | 3,577       | 26.09                                                         |
| 3,307            | 16,439        | 1,724             | 7,039            | 1,083           | 1,344       | 4,835            | 4,971             | 3,959       | 2,732          | 1,230            | 1,510            | 2,067                                         | 2,409                | 1,521       | 1,421             | 843             | 290             | 2,439        | 6,784         | 7,813                              | 22.35       | 1,299         | 8,486       | 29.76                                                         |
| 3,851            | 16,663        | 1,389             | 7,880            | 1,515           | 1,427       | 5,402            | 5,109             | 4,454       | 2,433          | 1,234            | 2,009            | 2,404                                         | 2,515                | 1,778       | 1,663             | 1,227           | 487             | 2,986        | 6,567         | 10,732                             | 19.57       | 1,932         | 6,064       | 28.64                                                         |
| 3,269            | 19,892        | 1,649             | 9,329            | 1,090           | 3,810       | 6,230            | 7,550             | 6,350       | 2,023          | 1,161            | 1,375            | 2,812                                         | 2,124                | 1,234       | 1,752             | 996             | 327             | 2,407        | 13,707        | 11,343                             | 24.48       | 1,573         | 2,463       | 41.81                                                         |
| 2,848            | 20,441        | 1,455             | 5,679            | 1,449           | 2,134       | 5,666            | 7,811             | 3,891       | 2,437          | 1,255            | 1,434            | 2,235                                         | 2,490                | 1,340       | 1,606             | 1,064           | 121             | 2,306        | 7,271         | 9,989                              | 20.05       | 1,854         | 2,207       | 29.47                                                         |
| 2,386            | 19,000        | 1,999             | 6,795            | 1,548           | 2,290       | 5,115            | 6,176             | 3,654       | 1,856          | 1,082            | 1,669            | 2,212                                         | 2,074                | 964         | 1,897             | 985             | 167             | 2,043        | 9,843         | 6,847                              | 24.30       | 648           | 2,681       | 25.59                                                         |
| 1,959            | 15,730        | 1,244             | 6,783            | 1,261           | 2,600       | 5,019            | 6,741             | 4,840       | 1,724          | 1,374            | 1,507            | 2,749                                         | 2,052                | 876         | 1,598             | 1,313           | 147             | 1,830        | 7,773         | 6,637                              | 19.05       | 407           | 1,874       | 24.64                                                         |
| 2,331            | 15,239        | 1,785             | 9,313            | 992             | 2,374       | 5,896            | 6,369             | 4,461       | 2,524          | 1,363            | 1,372            | 2,255                                         | 2,689                | 843         | 1,496             | 1,019           | 201             | 2,058        | 7,156         | 10,287                             | 20.15       | 1,363         | 4,073       | 16.23                                                         |
| 2,648            | 17,653        | 1,505             | 8,604            | 1,113           | 2,646       | 5,358            | 8,638             | 6,107       | 2,628          | 1,095            | 1,212            | 2,693                                         | 2,750                | 1,409       | 1,276             | 527             | 308             | 2,233        | 11,633        | 9,603                              | 26.78       | 717           | 4,512       | 25.38                                                         |
| 1,698            | 17,490        | 1,285             | 8,007            | 1,263           | 1,698       | 5,073            | 5,351             | 6,080       | 2,570          | 1,608            | 1,747            | 2,654                                         | 1,990                | 1,090       | 1,331             | 752             | 174             | 2,136        | 5,700         | 5,967                              | 19.26       | 780           | 2,579       | 34.50                                                         |
| 3,303            | 19,456        | 1,197             | 7,494            | 1,268           | 1,705       | 4,930            | 7,214             | 6,333       | 2,745          | 1,570            | 1,502            | 2,224                                         | 2,144                | 1,335       | 1,496             | 2,352           | 231             | 1,618        | 6,072         | 9,282                              | 24.41       | 833           | 2,968       | 24.90                                                         |
| 2,946            | 20,478        | 1,614             | 7,198            | 1,339           | 1,224       | 4,111            | 6,172             | 6,572       | 1,482          | 1,519            | 1,531            | 2,437                                         | 2,054                | 1,311       | 1,533             | 892             | 212             | 2,412        | 8,663         | 7,137                              | 23.27       | 288           | 2,869       | 32.41                                                         |
| 3,162            | 21,253        | 1,349             | 7,955            | 1,302           | 2,160       | 7,775            | 4,505             | 6,015       | 2,785          | 1,426            | 1,613            | 2,687                                         | 2,287                | 1,163       | 1,570             | 1,161           | 119             | 2,010        | 7,713         | 8,724                              | 12.09       | 0             | 2,691       | 28.70                                                         |
| 2,702            | 15,857        | 1,262             | 7,769            | 1,724           | 1,280       | 6,202            | 3,515             | 6,078       | 1,834          | 2,057            | 1,750            | 2,207                                         | 2,422                | 1,916       | 1,528             | 1,179           | 261             | 3,005        | 6,235         | 7,006                              | 18.26       | 809           | 3,346       | 36.49                                                         |
| 3,023            | 19,434        | 1,268             | 8,308            | 1,762           | 1,764       | 6,325            | 4,391             | 5,269       | 2,289          | 2,013            | 1,861            | 2,600                                         | 2,396                | 2,096       | 1,343             | 1,384           | 218             | 3,693        | 9,585         | 8,962                              | 22.71       | 324           | 4,004       | 40.73                                                         |
| 2,559            | 17,390        | 1,237             | 7,297            | 1,373           | 1,462       | 4,887            | 3,390             | 4,883       | 2,817          | 1,839            | 2,019            | 2,260                                         | 1,791                | 1,474       | 1,594             | 671             | 261             | 2,685        | 5,910         | 8,439                              | 27.33       | 1,162         | 2,213       | 37.03                                                         |
| 3,049            | 16,243        | 1,527             | 5,757            | 1,565           | 1,106       | 6,003            | 3,706             | 7,447       | 2,551          | 2,112            | 1,926            | 2,263                                         | 1,998                | 1,778       | 1,389             | 884             | 421             | 3,213        | 7,090         | 8,409                              | 20.75       | 709           | 3,993       | 24.11                                                         |
| 2,496            | 22,147        | 1,418             | 8,648            | 1,501           | 1,908       | 4,931            | 4,265             | 5,836       | 3,265          | 2,229            | 1,614            | 2,780                                         | 2,626                | 1,760       | 1,843             | 2,301           | 326             | 2,899        | 8,171         | 9,067                              | 19.19       | 613           | 3,733       | 30.14                                                         |
| 2,587            | 22,179        | 1,047             | 7,625            | 1,617           | 1,340       | 5,234            | 3,593             | 7,701       | 3,237          | 1,935            | 2,098            | 2,467                                         | 1,771                | 1,553       | 1,370             | 776             | 175             | 2,246        | 6,247         | 5,738                              | 16.48       | 683           | 1,652       | 32.02                                                         |
| 2,514            | 20,636        | 1,713             | 10,743           | 1,124           | 2,216       | 5,635            | 5,495             | 6,887       | 2,165          | 1,635            | 1,752            | 3,316                                         | 2,521                | 1,153       | 1,824             | 692             | 114             | 3,553        | 7,507         | 10,346                             | 19.18       | 100           | 2,024       | 40.69                                                         |
| 2,815            | 19,816        | 1,033             | 8,372            | 1,455           | 2,482       | 11,228           | 5,543             | 6,963       | 2,188          | 1,311            | 1,418            | 2,968                                         | 2,324                | 1,205       | 1,876             | 1,213           | 296             | 2,691        | 11,087        | 12,702                             | 20.21       | 501           | 2,564       | 33.56                                                         |
| 2,326            | 15,663        | 1,222             | 8,019            | 1,225           | 1,363       | 5,315            | 3,271             | 5,980       | 2,583          | 1,846            | 1,514            | 2,525                                         | 2,355                | 1,225       | 1,644             | 435             | 260             | 2,681        | 9,551         | 8,179                              | 26.30       | 783           | 1,996       | 18.60                                                         |
| 2,655            | 19,343        | 1,140             | 10,013           | 1,298           | 1,465       | 5,245            | 5,316             | 5,123       | 3,233          | 2,457            | 1,370            | 2,273                                         | 1,985                | 1,338       | 1,654             | 1,097           | 262             | 2,812        | 8,993         | 9,385                              | 28.81       | 1,163         | 3,403       | 40.74                                                         |
| 3,418            | 18,247        | 920               | 8,740            | 1,529           | 2,257       | 7,486            | 4,809             | 6,507       | 2,708          | 1,715            | 1,439            | 2,591                                         | 1,714                | 1,165       | 1,441             | 457             | 125             | 2,431        | 5,784         | 13,954                             | 21.39       | 356           | 1,525       | 42.00                                                         |
| 2,284            | 16,547        | 2,504             | 6,450            | 1,001           | 1,981       | 6,279            | 6,089             | 5,296       | 1,725          | 1,963            | 1,711            | 2,272                                         | 2,041                | 844         | 1,639             | 513             | 187             | 2,781        | 7,762         | 12,366                             | 20.37       | 798           | 1,845       | 31.05                                                         |
| 2,495            | 19,485        | 1,320             | 7,648            | 1,040           | 1,254       | 7,558            | 3,939             | 5,548       | 2,657          | 1,541            | 1,414            | 2,264                                         | 2,064                | 1,185       | 1,576             | 505             | 221             | 2,515        | 5,616         | 7,545                              | 17.42       | 367           | 2,606       | 34.41                                                         |
| 2,195            | 18,362        | 771               | 9,767            | 1,186           | 1,616       | 5,249            | 4,233             | 7,110       | 3,443          | 1,794            | 1,565            | 2,257                                         | 1,763                | 1,143       | 1,576             | 591             | 149             | 2,725        | 5,354         | 9,509                              | 21.37       | 542           | 2,693       | 29.30                                                         |
| 2,184            | 17,640        | 1,166             | 8,299            | 1,301           | 3,138       | 6,636            | 4,937             | 6,314       | 1,540          | 1,633            | 1,749            | 2,631                                         | 2,471                | 991         | 1,513             | 666             | 192             | 2,435        | 7,555         | 12,337                             | 16.83       | 512           | 2,634       | 59.17                                                         |
| 1,981            | 17,896        | 1,666             | 7,589            | 1,257           | 2,257       | 4,182            | 4,975             | 4,002       | 1,734          | 1,449            | 2,127            | 2,913                                         | 2,171                | 929         | 1,618             | 671             | 215             | 2,778        | 4,936         | 9,720                              | 24.25       | 705           | 4,415       | 26.09                                                         |
| 2,374            | 17,952        | 1,203             | 12,095           | 1,245           | 1,860       | 8,246            | 6,816             | 7,906       | 2,577          | 1,269            | 1,557            | 3,174                                         | 2,743                | 815         | 1,809             | 1,032           | 151             | 2,191        | 6,157         | 12,955                             | 25.43       | 1,374         | 1,696       | 28.14                                                         |
| 3,039            | 15,684        | 1,034             | 10,605           | 1,097           | 1,991       | 6,054            | 6,934             | 5,798       | 2,109          | 1,429            | 1,863            | 2,930                                         | 2,232                | 1,205       | 1,444             | 850             | 165             | 2,307        | 6,961         | 10,755                             | 24.51       | 533           | 2,620       | 28.07                                                         |
| 2,209            | 14,735        | 1,317             | 10,139           | 1,261           | 1,904       | 6,794            | 7,122             | 6,612       | 2,424          | 1,427            | 1,532            | 3,106                                         | 3,013                | 892         | 1,784             | 1,374           | 165             | 1,868        | 3,732         | 11,891                             | 17.58       | 774           | 3,214       | 49.32                                                         |
| 2,534            | 19,593        | 931               | 10,057           | 1,325           | 3,005       | 8,094            | 7,332             | 7,168       | 1,522          | 1,314            | 1,437            | 2,821                                         | 2,513                | 1,268       | 1,596             | 1,010           | 262             | 2,100        | 4,873         | 14,491                             | 20.50       | 491           | 3,580       | 32.38                                                         |
| 2,531            | 15,262        | 1,030             | 8,038            | 1,026           | 1,755       | 7,219            | 6,603             | 7,461       | 3,541          | 1,142            | 1,426            | 2,475                                         | 2,672                | 769         |                   |                 |                 |              |               |                                    |             |               |             |                                                               |

Nutrient calculations

|       |                   | 朝昼夕<br>間食 | 献立名 | 食品<br>番号 | 食品名 | Weight    | 食品群 | 廃棄率<br>(%) | Energy          | Energy        | Water     | Protein      | アミノ酸組成<br>たんぱく質 | Fat     | TG 当量   | Fatty acids  |                     |                     | Cholesterol     | Carbohydrate | 利用可能<br>炭水化物<br>(g) | 低分子量<br>水溶性<br>食物繊維<br>(g) |
|-------|-------------------|-----------|-----|----------|-----|-----------|-----|------------|-----------------|---------------|-----------|--------------|-----------------|---------|---------|--------------|---------------------|---------------------|-----------------|--------------|---------------------|----------------------------|
|       |                   |           |     |          |     | 重量<br>(g) |     |            | エネルギー<br>(kcal) | エネルギー<br>(kJ) | 水分<br>(g) | たんぱく質<br>(g) |                 |         |         | 飽和脂肪酸<br>(g) | 一価不飽和<br>脂肪酸<br>(g) | 多価不飽和<br>脂肪酸<br>(g) | コレステロール<br>(mg) | 炭水化物<br>(g)  |                     |                            |
| 全国    | All Japan         | 総 合 計     | 0.0 | 0.0      | 0.0 | 720885.0  | 0.0 | 0.0        | 1088588.9       | 4553837.2     | 499562.3  | 35251.0      | 29597.2         | 41061.0 | 38135.7 | 12021.8      | 16304.8             | 8284.5              | 191037.5        | 129389.9     | 121282.1            | 579.4                      |
| 札幌市   | Sapporo-shi       | 総 合 計     | 0.0 | 0.0      | 0.0 | 755578.5  | 0.0 | 0.0        | 1170481.1       | 4897132.6     | 521080.6  | 36740.2      | 30772.8         | 45018.2 | 42079.2 | 12813.9      | 18006.3             | 9613.9              | 207571.1        | 134325.8     | 126210.2            | 521.7                      |
| 青森市   | Aomori-shi        | 総 合 計     | 0.0 | 0.0      | 0.0 | 818241.0  | 0.0 | 0.0        | 1236876.8       | 5174862.4     | 565739.4  | 40301.8      | 33915.9         | 46208.4 | 42905.6 | 13010.7      | 18285.5             | 9945.1              | 224172.4        | 146379.4     | 138052.8            | 591.7                      |
| 盛岡市   | Morioka-shi       | 総 合 計     | 0.0 | 0.0      | 0.0 | 769966.0  | 0.0 | 0.0        | 1094410.4       | 4578589.9     | 541576.9  | 38146.4      | 30461.0         | 38095.8 | 35271.5 | 11415.0      | 14704.5             | 7783.7              | 187104.8        | 134650.9     | 124282.8            | 557.4                      |
| 仙台市   | Sendai-shi        | 総 合 計     | 0.0 | 0.0      | 0.0 | 742183.5  | 0.0 | 0.0        | 1031855.7       | 4316736.4     | 529325.5  | 34521.5      | 28873.6         | 37951.0 | 35197.4 | 11288.3      | 14793.1             | 7761.7              | 192880.1        | 122881.4     | 111595.9            | 554.5                      |
| 秋田市   | Akita-shi         | 総 合 計     | 0.0 | 0.0      | 0.0 | 777974.5  | 0.0 | 0.0        | 1148948.1       | 4807078.6     | 541902.2  | 36809.2      | 30835.5         | 42372.7 | 39425.0 | 12002.1      | 16646.2             | 9217.8              | 191011.6        | 137253.4     | 126201.1            | 493.1                      |
| 山形市   | Yamagata-shi      | 総 合 計     | 0.0 | 0.0      | 0.0 | 788120.5  | 0.0 | 0.0        | 1167070.4       | 4882784.3     | 544489.7  | 36912.2      | 31123.6         | 42892.5 | 39791.5 | 12582.5      | 17060.3             | 8570.2              | 200694.7        | 141539.2     | 132092.7            | 532.0                      |
| 福島市   | Fukushima-shi     | 総 合 計     | 0.0 | 0.0      | 0.0 | 702777.0  | 0.0 | 0.0        | 1049523.3       | 390996.4      | 486672.6  | 33171.3      | 27907.0         | 37986.1 | 35319.5 | 10759.1      | 14957.6             | 8240.5              | 183830.8        | 128299.4     | 119841.3            | 513.2                      |
| 水戸市   | Mito-shi          | 総 合 計     | 0.0 | 0.0      | 0.0 | 670797.0  | 0.0 | 0.0        | 952198.4        | 3983478.8     | 477398.1  | 31663.1      | 26518.1         | 37376.4 | 34786.7 | 10841.9      | 14600.8             | 7983.9              | 168026.5        | 111052.4     | 102156.8            | 495.8                      |
| 宇都宮市  | Utsunomiya-shi    | 総 合 計     | 0.0 | 0.0      | 0.0 | 691219.5  | 0.0 | 0.0        | 997029.3        | 4170944.3     | 489872.5  | 32660.3      | 27393.3         | 37848.4 | 35197.5 | 11009.9      | 14832.8             | 8005.5              | 179739.2        | 116145.2     | 107600.9            | 569.7                      |
| 宇都宮市  | Maebashi-shi      | 総 合 計     | 0.0 | 0.0      | 0.0 | 977760.4  | 0.0 | 0.0        | 977760.4        | 4090426.8     | 460732.4  | 30910.5      | 25954.8         | 34028.8 | 31655.9 | 9969.8       | 13261.8             | 7317.6              | 151039.4        | 123100.5     | 115793.0            | 547.5                      |
| さいたま市 | Saitama-shi       | 総 合 計     | 0.0 | 0.0      | 0.0 | 745048.0  | 0.0 | 0.0        | 1089041.0       | 4543262.9     | 525629.9  | 35507.9      | 29831.1         | 41569.3 | 38713.1 | 12377.3      | 16443.2             | 8380.4              | 181303.8        | 127043.7     | 118196.2            | 628.0                      |
| 千葉市   | Chiba-shi         | 総 合 計     | 0.0 | 0.0      | 0.0 | 771966.5  | 0.0 | 0.0        | 1086323.2       | 4544543.3     | 549858.5  | 36937.7      | 30856.2         | 41290.3 | 38249.5 | 12378.8      | 16094.1             | 8291.4              | 195688.0        | 128308.5     | 118705.5            | 609.1                      |
| 東京都都部 | Ku-areas of Tokyo | 総 合 計     | 0.0 | 0.0      | 0.0 | 703354.0  | 0.0 | 0.0        | 992828.2        | 4153264.9     | 502958.3  | 33065.8      | 27855.8         | 38284.3 | 35575.8 | 11639.5      | 15077.1             | 7468.0              | 171221.4        | 114817.5     | 106191.1            | 589.2                      |
| 横浜市   | Yokohama-shi      | 総 合 計     | 0.0 | 0.0      | 0.0 | 759305.0  | 0.0 | 0.0        | 1116811.9       | 4671964.2     | 534162.6  | 36954.2      | 30828.0         | 42967.3 | 39904.4 | 12978.3      | 16870.9             | 8403.3              | 188811.3        | 129835.6     | 121274.9            | 633.0                      |
| 新潟市   | Niigata-shi       | 総 合 計     | 0.0 | 0.0      | 0.0 | 829189.5  | 0.0 | 0.0        | 1197689.0       | 5010690.5     | 581616.9  | 38829.1      | 32560.1         | 42736.7 | 39701.0 | 12241.0      | 16652.2             | 8250.0              | 207362.5        | 146336.0     | 138027.6            | 626.5                      |
| 富山市   | Toyama-shi        | 総 合 計     | 0.0 | 0.0      | 0.0 | 741980.0  | 0.0 | 0.0        | 1075132.3       | 4497290.4     | 521682.3  | 37013.4      | 31140.1         | 39795.6 | 36652.1 | 12205.9      | 15456.3             | 7571.7              | 199444.5        | 127522.4     | 117827.6            | 636.7                      |
| 金沢市   | Kanazawa-shi      | 総 合 計     | 0.0 | 0.0      | 0.0 | 707205.0  | 0.0 | 0.0        | 1048856.1       | 4387444.5     | 492847.3  | 34968.8      | 29417.5         | 39242.1 | 38272.7 | 11790.8      | 15414.4             | 7850.2              | 192999.7        | 125507.1     | 116915.1            | 614.2                      |
| 福井市   | Fukui-shi         | 総 合 計     | 0.0 | 0.0      | 0.0 | 654763.5  | 0.0 | 0.0        | 1058655.0       | 4428667.1     | 435740.6  | 33267.9      | 27940.8         | 37304.9 | 34469.6 | 10903.1      | 14836.8             | 7397.4              | 197614.3        | 134401.5     | 128222.6            | 528.3                      |
| 甲府市   | Kofu-shi          | 総 合 計     | 0.0 | 0.0      | 0.0 | 707889.5  | 0.0 | 0.0        | 1089280.6       | 4556998.5     | 486733.5  | 35471.1      | 29724.4         | 41717.4 | 38894.7 | 12033.1      | 16546.4             | 8823.2              | 176573.0        | 128623.3     | 120868.2            | 556.2                      |
| 長野市   | Nagano-shi        | 総 合 計     | 0.0 | 0.0      | 0.0 | 711906.5  | 0.0 | 0.0        | 1032563.7       | 4319611.9     | 507516.3  | 32825.5      | 27588.5         | 38204.5 | 35512.1 | 10929.7      | 14918.8             | 8275.6              | 176321.4        | 124945.3     | 114955.0            | 473.7                      |
| 岐阜市   | Gifu-shi          | 総 合 計     | 0.0 | 0.0      | 0.0 | 683658.0  | 0.0 | 0.0        | 1088985.9       | 4555496.5     | 460621.1  | 34077.1      | 28756.8         | 39089.6 | 36308.6 | 11365.9      | 15435.3             | 8108.4              | 186320.8        | 136594.0     | 130516.2            | 587.2                      |
| 静岡市   | Shizuoka-shi      | 総 合 計     | 0.0 | 0.0      | 0.0 | 775410.0  | 0.0 | 0.0        | 1179474.6       | 4933937.5     | 531012.6  | 39069.8      | 32431.7         | 41054.4 | 38083.3 | 12497.5      | 15882.2             | 8269.8              | 190027.5        | 149166.3     | 140552.5            | 658.5                      |
| 名古屋市  | Nagoya-shi        | 総 合 計     | 0.0 | 0.0      | 0.0 | 726195.0  | 0.0 | 0.0        | 1098126.0       | 4593612.3     | 501705.1  | 35222.3      | 29591.3         | 39496.8 | 36616.9 | 11783.1      | 15565.0             | 7860.0              | 187671.9        | 136328.7     | 128769.9            | 822.1                      |
| 津市    | Tsu-shi           | 総 合 計     | 0.0 | 0.0      | 0.0 | 705462.5  | 0.0 | 0.0        | 1113649.6       | 4658727.8     | 478197.7  | 35982.8      | 30238.9         | 41326.1 | 38220.1 | 12083.7      | 16438.3             | 8231.8              | 208510.7        | 135577.4     | 129253.7            | 555.9                      |
| 大津市   | Otsu-shi          | 総 合 計     | 0.0 | 0.0      | 0.0 | 704236.5  | 0.0 | 0.0        | 1076057.3       | 4501149.8     | 487269.4  | 34631.7      | 29045.7         | 41274.0 | 38290.3 | 12333.8      | 16490.7             | 7954.8              | 186621.2        | 127314.6     | 120712.5            | 620.0                      |
| 京都市   | Kyoto-shi         | 総 合 計     | 0.0 | 0.0      | 0.0 | 809922.0  | 0.0 | 0.0        | 1200654.5       | 5022404.3     | 562893.7  | 38322.1      | 32059.2         | 44539.3 | 41218.3 | 13232.1      | 17856.1             | 8507.6              | 207952.6        | 145099.5     | 136955.8            | 683.7                      |
| 大阪市   | Osaka-shi         | 総 合 計     | 0.0 | 0.0      | 0.0 | 722335.5  | 0.0 | 0.0        | 1082255.0       | 4727165.0     | 505537.6  | 35432.4      | 29802.9         | 42145.8 | 39015.6 | 12710.6      | 17006.9             | 7770.5              | 206569.1        | 124959.1     | 117940.2            | 625.9                      |
| 神戸市   | Kobe-shi          | 総 合 計     | 0.0 | 0.0      | 0.0 | 692359.5  | 0.0 | 0.0        | 1028708.5       | 4302833.2     | 481821.4  | 33587.3      | 28123.4         | 37465.8 | 34616.8 | 11483.2      | 14898.4             | 6877.4              | 177063.1        | 125866.8     | 118875.7            | 612.6                      |
| 奈良市   | Nara-shi          | 総 合 計     | 0.0 | 0.0      | 0.0 | 789402.0  | 0.0 | 0.0        | 1237066.8       | 5174826.4     | 538427.7  | 39228.5      | 32688.2         | 46516.3 | 43089.1 | 13835.7      | 18677.0             | 8880.1              | 217308.0        | 149725.8     | 142119.3            | 832.2                      |
| 和歌山市  | Wakayama-shi      | 総 合 計     | 0.0 | 0.0      | 0.0 | 707323.5  | 0.0 | 0.0        | 1095713.1       | 4583624.6     | 486574.0  | 36662.8      | 30780.4         | 42936.8 | 39723.5 | 12704.2      | 17362.1             | 8107.6              | 216404.2        | 127950.4     | 121009.2            | 578.7                      |
| 鳥取市   | Tottori-shi       | 総 合 計     | 0.0 | 0.0      | 0.0 | 779150.0  | 0.0 | 0.0        | 1143329.6       | 4782625.7     | 551147.0  | 38080.1      | 32068.9         | 46847.3 | 43411.3 | 13208.5      | 18657.2             | 9824.6              | 237461.5        | 127349.6     | 118367.7            | 606.8                      |
| 松江市   | Matsue-shi        | 総 合 計     | 0.0 | 0.0      | 0.0 | 763634.0  | 0.0 | 0.0        | 1145538.0       | 4791787.4     | 530684.5  | 38227.3      | 32038.6         | 43739.6 | 40453.5 | 12813.1      | 17262.3             | 8778.3              | 215671.3        | 133098.5     | 124309.1            | 660.7                      |
| 岡山市   | Okayama-shi       | 総 合 計     | 0.0 | 0.0      | 0.0 | 654993.5  | 0.0 | 0.0        | 994408.1        | 4159625.7     | 457833.7  | 33147.6      | 27956.2         | 40800.3 | 37894.0 | 11894.6      | 16412.6             | 8084.5              | 193883.3        | 109981.0     | 103190.6            | 570.0                      |
| 広島市   | Hiroshima-shi     | 総 合 計     | 0.0 | 0.0      | 0.0 | 763644.0  | 0.0 | 0.0        | 1128704.9       | 4721700.0     | 538309.6  | 35752.5      | 29961.1         | 44632.2 | 41415.3 | 12904.3      | 17863.5             | 8988.2              | 196934.0        | 129180.0     | 120298.6            | 594.2                      |
| 山口市   | Yamaguchi-shi     | 総 合 計     | 0.0 | 0.0      | 0.0 | 705806.0  | 0.0 | 0.0        | 1064542.9       | 4453158.8     | 493490.7  | 34924.0      | 29442.8         | 42763.2 | 39623.8 | 12315.3      | 17220.5             | 8511.3              | 205474.3        | 118666.1     | 110999.6            | 573.7                      |
| 徳島市   | Tokushima-shi     | 総 合 計     | 0.0 | 0.0      | 0.0 | 700164.0  | 0.0 | 0.0        | 1037468.9       | 4339964.6     | 486814.6  | 32712.9      | 27475.7         | 37062.4 | 34294.7 | 11039.1      | 14777.8             | 7144.7              | 166619.4        | 128172.4     | 120499.1            | 585.9                      |
| 高松市   | Takamatsu-shi     | 総 合 計     | 0.0 | 0.0      | 0.0 | 715807.0  | 0.0 | 0.0        | 1057884.1       | 4425232.8     | 499333.8  | 34407.6      | 28935.1         | 38920.4 | 35953.4 | 11498.4      | 15336.1             | 7698.5              | 193078.5        | 129305.0     | 121759.7            | 587.5                      |
| 松山市   | Matsuyama-shi     | 総 合 計     | 0.0 | 0.0      | 0.0 | 703011.5  | 0.0 | 0.0        | 1102368.0       | 4611385.4     | 481233.8  | 34402.8      | 29039.8         | 42345.7 | 39252.7 | 12081.2      | 16956.0             | 8669.5              | 205705.0        | 131417.8     | 125275.8            | 579.9                      |
| 高知市   | Kochi-shi         | 総 合 計     | 0.0 | 0.0      | 0.0 | 696895.0  | 0.0 | 0.0        | 1036658.8       | 4336322.0     | 486998.9  | 34314.3      | 28690.9         | 39568.4 | 36612.5 | 11042.7      | 15945.1             | 8217.9              | 201816.7        | 118780.4     | 110457.0            | 553.8                      |
| 福岡市   | Fukuoka-shi       | 総 合 計     | 0.0 | 0.0      | 0.0 | 692352.5  | 0.0 | 0.0        | 1078572.2       | 4511986.4     | 477288.2  | 35245.9      | 29651.8         | 43528.6 | 40476.1 | 13009.7      | 17668.5             | 8175.6              | 194998.2        | 121872.3     | 115195.7            | 584.4                      |
| 佐賀市   | Saga-shi          | 総 合 計     | 0.0 | 0.0      | 0.0 | 770454.5  | 0.0 | 0.0        | 1268574.8       | 5307098.2     | 513007.1  | 38319.6      | 32155.8         | 47220.8 | 43938.4 | 12841.3      | 19012.2             | 10336.3             | 195960.3        | 155452.5     | 148255.3            | 614.9                      |
| 長崎市   | Nagasaki-shi      | 総 合 計     | 0.0 | 0.0      | 0.0 | 697280.0  | 0.0 | 0.0        | 1116933.8       | 4672739.1     | 472364.5  | 34778.1      | 29211.7         | 43209.2 | 40204.1 | 11936.9      | 17385.4             | 9284.3              | 192967.9        | 132022.4     | 124824.2            | 548.7                      |
| 熊本市   | Kumamoto-shi      | 総 合 計     | 0.0 | 0.0      | 0.0 | 694315.5  | 0.0 | 0.0        | 1107586.5       | 4633531.9     | 473009.6  | 34124.4      | 28528.6         | 43797.1 | 40786.0 | 12116.4      | 17849.9             | 9195.1              | 194487.1        | 127925.8     | 119866.9            | 519.6                      |
| 大分市   | Oita-shi          | 総 合 計     | 0.0 | 0.0      | 0.0 | 723637.0  | 0.0 | 0.0        | 1122961.0       | 4697947.4     | 497871.8  | 35914.3      | 30114.4         | 44874.6 | 41618.4 | 12589.4      | 18134.9             | 9233.0              | 204881.2        | 127966.3     | 119264.8            | 550.3                      |
| 宮崎県   | Miyazaki-shi      | 総 合 計     | 0.0 | 0.0      | 0.0 | 685158.0  | 0.0 | 0.0        | 978181.4        | 4092194.9     | 469871.6  | 31106.7      | 26025.9         | 38427.5 | 35733.4 | 11090.5      | 15413.9             | 7805.0              | 172727.         |              |                     |                            |

| Dietary fibers             |                    |                   | Ash<br>灰分<br>(g) | Salt<br>食塩<br>相当量<br>(g) | Na<br>ナトリウム<br>(mg) | K<br>カリウム<br>(mg) | Ca<br>カルシウム<br>(mg) | Mg<br>マグネシウム<br>(mg) | P<br>リン<br>(mg) | Fe<br>鉄<br>(mg) | Zn<br>亜鉛<br>(mg) | Cu<br>銅<br>(mg) | Mn<br>マンガン<br>(mg) | I<br>ヨウ素<br>(μg) | Se<br>セレン<br>(μg) | Cr<br>クロム<br>(μg) | Mo<br>モリブデン<br>(μg) | Vitamin A              |                |                |                         |                      |
|----------------------------|--------------------|-------------------|------------------|--------------------------|---------------------|-------------------|---------------------|----------------------|-----------------|-----------------|------------------|-----------------|--------------------|------------------|-------------------|-------------------|---------------------|------------------------|----------------|----------------|-------------------------|----------------------|
| 高分子量<br>水溶性<br>食物繊維<br>(g) | 不溶性<br>食物繊維<br>(g) | 食物繊維<br>総量<br>(g) |                  |                          |                     |                   |                     |                      |                 |                 |                  |                 |                    |                  |                   |                   |                     | レチノール<br>キサンチン<br>(μg) | α-カロテン<br>(μg) | β-カロテン<br>(μg) | β-クリプト<br>キサンチン<br>(μg) | β-カロテン<br>当量<br>(μg) |
| 1822.5                     | 5333.0             | 8207.3            | 9562.0           | 5905.1                   | 2336014.0           | 1234859.2         | 244767.7            | 125563.1             | 507105.9        | 3828.6          | 4180.5           | 524.5           | 1923.3             | 859081.7         | 45807.7           | 3816.1            | 102691.1            | 123059.9               | 292476.4       | 1339527.9      | 243165.1                | 1732175.6            |
| 1834.0                     | 5359.1             | 8083.2            | 9910.1           | 6211.7                   | 2455747.1           | 1251669.1         | 232938.5            | 125034.7             | 526592.5        | 3822.7          | 4351.3           | 542.8           | 1984.1             | 903096.2         | 48060.7           | 3864.4            | 104901.4            | 144905.2               | 282641.7       | 1302104.0      | 243289.0                | 1693119.8            |
| 1989.9                     | 5986.5             | 9463.8            | 11721.2          | 7596.9                   | 3002840.1           | 1413855.4         | 259412.5            | 147685.6             | 573455.3        | 4335.1          | 4667.2           | 609.4           | 1923.7             | 1740900.0        | 55791.4           | 4389.3            | 120057.0            | 148710.6               | 351175.3       | 1582198.5      | 217592.6                | 1948246.6            |
| 1932.0                     | 5674.6             | 9004.0            | 12074.9          | 8171.0                   | 3227959.1           | 1314533.0         | 266474.1            | 136862.6             | 526589.8        | 3903.7          | 4136.3           | 543.3           | 1817.3             | 1280920.0        | 47810.1           | 3972.5            | 108766.8            | 143394.8               | 347752.6       | 1464003.2      | 248204.3                | 1850805.6            |
| 1930.0                     | 5741.5             | 9048.8            | 10946.4          | 7129.8                   | 2818181.4           | 1293863.1         | 255784.9            | 131768.2             | 506240.9        | 3881.0          | 4053.7           | 523.6           | 2016.6             | 1408160.2        | 45664.5           | 3863.8            | 97407.3             | 147275.7               | 321336.6       | 1466671.3      | 285439.4                | 1930085.9            |
| 1875.3                     | 5816.8             | 8930.1            | 11840.2          | 7928.7                   | 3132051.6           | 1334743.1         | 256382.3            | 136412.7             | 533025.9        | 4057.1          | 4309.5           | 561.4           | 1959.4             | 1185066.3        | 47856.0           | 4027.9            | 108368.5            | 137879.2               | 297608.1       | 1478800.2      | 284807.9                | 1883195.5            |
| 1802.9                     | 5408.0             | 8389.1            | 13510.2          | 9557.1                   | 3770031.5           | 1336761.3         | 264718.2            | 137580.9             | 544009.2        | 3999.0          | 4484.6           | 562.0           | 1887.4             | 1603882.5        | 47248.2           | 3940.4            | 115358.6            | 148531.5               | 287146.6       | 1394442.2      | 202666.6                | 1723341.0            |
| 1813.0                     | 5177.1             | 8209.7            | 10289.3          | 6731.7                   | 2660312.1           | 1202565.6         | 231398.2            | 124182.3             | 487592.9        | 3642.2          | 3985.1           | 519.5           | 1737.6             | 1448088.7        | 43075.6           | 3873.3            | 105256.3            | 138091.2               | 358165.5       | 1415707.8      | 223170.4                | 1787574.6            |
| 1709.9                     | 5024.1             | 7662.0            | 8711.3           | 5211.5                   | 2063419.2           | 1193565.7         | 239739.5            | 116223.2             | 470213.4        | 3484.1          | 3620.5           | 459.5           | 1713.6             | 598584.5         | 42404.9           | 3451.2            | 84723.8             | 136418.9               | 282349.0       | 1335971.5      | 269782.1                | 1732111.5            |
| 1785.1                     | 5119.6             | 8029.6            | 8185.2           | 4671.8                   | 1853086.3           | 1184375.0         | 240399.1            | 120587.5             | 475549.5        | 3606.5          | 3758.9           | 477.6           | 1893.6             | 826248.4         | 43190.7           | 3895.4            | 94524.8             | 146001.3               | 318192.2       | 1378275.9      | 260721.2                | 1816599.7            |
| 1734.8                     | 4955.4             | 7581.6            | 8414.4           | 5071.0                   | 2007869.2           | 1127471.2         | 217299.1            | 116099.1             | 452089.9        | 3402.7          | 3633.3           | 489.0           | 1847.3             | 664294.9         | 40529.9           | 3588.4            | 99684.1             | 129027.2               | 273262.6       | 1276302.5      | 22030.4                 | 1645053.5            |
| 1956.0                     | 5509.0             | 8569.7            | 9142.3           | 5379.8                   | 2131326.2           | 1265826.8         | 255613.8            | 127827.0             | 515756.9        | 3791.5          | 4157.1           | 514.6           | 1863.7             | 676320.8         | 45923.3           | 3830.3            | 102336.9            | 147058.3               | 316048.8       | 1505745.6      | 237140.1                | 1894353.8            |
| 2047.7                     | 5899.4             | 9120.6            | 10019.8          | 5951.9                   | 2355834.3           | 1391139.5         | 282087.1            | 136019.7             | 545806.9        | 4058.0          | 4277.6           | 538.2           | 2049.4             | 1126163.2        | 50161.5           | 4298.0            | 100814.4            | 163424.8               | 311636.1       | 1578230.0      | 283277.0                | 2025261.0            |
| 1864.6                     | 5361.3             | 8235.6            | 8317.0           | 4697.7                   | 1862325.4           | 1225522.4         | 248286.9            | 120987.1             | 486597.2        | 3632.2          | 3916.4           | 499.8           | 1816.6             | 725934.5         | 42599.4           | 3839.5            | 92946.5             | 138765.3               | 295014.0       | 1439391.8      | 224690.4                | 1822764.6            |
| 2018.0                     | 6008.9             | 9036.5            | 9878.0           | 5048.9                   | 2001061.7           | 1330700.5         | 262083.1            | 131637.9             | 534319.7        | 4060.4          | 4372.1           | 554.3           | 2225.5             | 634522.9         | 48001.9           | 4061.6            | 104779.1            | 158089.5               | 319470.9       | 1571285.9      | 200670.8                | 2006478.5            |
| 2110.5                     | 6367.4             | 9596.8            | 11892.0          | 7696.4                   | 3039787.7           | 1433743.1         | 263839.9            | 144426.8             | 567631.3        | 4320.5          | 4621.0           | 620.0           | 2246.1             | 1006614.2        | 52259.7           | 3973.9            | 102390.2            | 141779.8               | 377406.1       | 1688517.4      | 293449.1                | 2164354.0            |
| 1930.9                     | 5727.7             | 8835.4            | 10015.3          | 6130.5                   | 2425362.1           | 1322141.0         | 260257.4            | 131776.8             | 530630.0        | 3982.8          | 4257.1           | 535.2           | 1994.5             | 1335210.7        | 50848.6           | 3922.0            | 103651.2            | 148096.6               | 277010.0       | 1480856.1      | 256324.7                | 1762702.8            |
| 1830.1                     | 5378.4             | 8309.3            | 9598.2           | 5947.8                   | 2352787.6           | 1229245.2         | 251203.6            | 124633.9             | 502218.6        | 3775.9          | 4143.3           | 518.2           | 1937.5             | 950087.7         | 47567.4           | 3719.1            | 101444.2            | 135470.1               | 306751.3       | 1355018.4      | 240713.8                | 1767996.6            |
| 1630.0                     | 5002.0             | 7775.7            | 9471.7           | 6093.3                   | 2407237.5           | 1128608.7         | 228945.8            | 118939.5             | 482958.8        | 3814.3          | 4212.3           | 526.6           | 2184.2             | 1157540.4        | 43558.2           | 3525.1            | 109576.7            | 133123.0               | 248611.1       | 1133238.0      | 234080.8                | 1552311.5            |
| 1858.6                     | 5445.7             | 8435.2            | 9812.0           | 6100.2                   | 2414231.9           | 1256585.5         | 243914.5            | 128940.3             | 510169.4        | 3935.5          | 4190.7           | 536.9           | 2046.1             | 757758.8         | 45615.5           | 3865.8            | 106906.3            | 151927.3               | 312609.2       | 1458067.2      | 259050.9                | 1885336.3            |
| 1822.6                     | 5381.5             | 8291.9            | 10001.1          | 6422.4                   | 2538614.2           | 1220062.5         | 245265.8            | 121123.1             | 485180.8        | 3588.0          | 3781.0           | 488.6           | 1638.7             | 1053498.0        | 44357.3           | 3570.2            | 91344.2             | 140649.1               | 285888.4       | 1329823.5      | 253937.6                | 1680154.5            |
| 1632.3                     | 4923.1             | 7540.6            | 8503.8           | 5067.9                   | 2005755.0           | 1140840.9         | 231072.1            | 120824.1             | 491995.7        | 3980.3          | 4173.5           | 528.2           | 1919.9             | 678290.6         | 44141.5           | 3535.6            | 112838.7            | 139273.2               | 260606.8       | 1488560.7      | 196451.4                | 1485255.1            |
| 2107.4                     | 6611.9             | 9919.3            | 9571.1           | 5417.0                   | 2146143.8           | 1402617.8         | 287603.3            | 144228.3             | 574582.4        | 4504.3          | 4688.7           | 616.8           | 2953.2             | 807849.2         | 50694.5           | 4124.5            | 120969.3            | 172609.4               | 330134.6       | 1553494.0      | 441022.0                | 2254599.8            |
| 1859.8                     | 5475.9             | 8217.0            | 8193.9           | 4543.5                   | 1801224.8           | 1230464.2         | 240624.3            | 124669.4             | 505449.0        | 3805.4          | 4213.0           | 539.9           | 1971.7             | 508716.1         | 45475.5           | 3664.2            | 128223.5            | 1302846.0              | 200550.4       | 1689815.3      |                         |                      |
| 1716.5                     | 5134.7             | 7701.7            | 9521.5           | 5910.0                   | 2335877.8           | 1211435.7         | 243334.9            | 123246.1             | 516705.3        | 3830.6          | 4326.0           | 531.0           | 2119.0             | 699710.1         | 46893.6           | 3538.6            | 107408.5            | 159034.3               | 285795.8       | 1226107.1      | 261500.5                | 1659924.9            |
| 1803.5                     | 5205.8             | 7930.9            | 8413.3           | 4883.2                   | 1933527.1           | 1179670.2         | 243724.5            | 118874.8             | 495071.7        | 3658.2          | 4093.6           | 499.0           | 2044.2             | 553457.1         | 45000.4           | 3741.2            | 98007.4             | 135780.6               | 283826.4       | 1271221.2      | 176937.0                | 1667958.7            |
| 2119.3                     | 6068.8             | 9265.0            | 9838.0           | 5783.1                   | 2290234.7           | 1361961.2         | 272446.0            | 136520.3             | 551092.1        | 4172.2          | 4699.7           | 576.0           | 2366.3             | 990236.9         | 49994.4           | 4254.9            | 106185.4            | 146969.8               | 273863.1       | 1395949.8      | 265393.5                | 1857122.6            |
| 1853.6                     | 5107.3             | 7906.8            | 8458.8           | 4852.9                   | 1922621.6           | 1210237.0         | 240709.6            | 120505.0             | 501510.8        | 3641.0          | 4237.6           | 501.8           | 1767.7             | 753333.5         | 45980.4           | 3737.7            | 96431.7             | 144858.5               | 272657.5       | 1270475.1      | 178605.4                | 1595178.6            |
| 1788.3                     | 5157.4             | 8010.4            | 8282.4           | 4818.8                   | 1908625.3           | 1159320.6         | 240604.1            | 118438.9             | 479954.8        | 3528.9          | 4024.2           | 494.8           | 1878.3             | 555261.4         | 44032.0           | 3785.3            | 93100.5             | 127390.2               | 259012.8       | 1209043.9      | 227407.9                | 1580091.0            |
| 2019.0                     | 6350.4             | 9397.1            | 9624.3           | 5559.3                   | 2201080.2           | 1365488.3         | 276350.3            | 137035.9             | 580226.2        | 4376.7          | 4841.2           | 600.2           | 2909.8             | 898812.7         | 50105.5           | 4043.8            | 114443.9            | 154975.1               | 305372.4       | 1408577.6      | 262096.5                | 2004498.8            |
| 1842.4                     | 5107.0             | 7988.1            | 8756.4           | 5129.0                   | 2031700.5           | 1231743.7         | 238679.8            | 124265.5             | 509807.7        | 3738.1          | 4283.2           | 510.6           | 1803.4             | 907043.0         | 48482.0           | 4285.1            | 95446.7             | 150484.4               | 253168.6       | 1205663.5      | 238647.7                | 1560766.1            |
| 1782.1                     | 5143.7             | 8037.3            | 9937.1           | 6110.0                   | 2415893.0           | 1282918.9         | 264023.5            | 131135.2             | 537169.3        | 3936.6          | 4588.7           | 540.8           | 1754.7             | 813717.7         | 56532.1           | 3886.6            | 98742.3             | 1273726.7              | 257477.7       | 1273726.7      | 291304.5                | 1646047.8            |
| 1880.1                     | 5545.4             | 8789.7            | 10981.9          | 7111.5                   | 2810054.1           | 1307338.6         | 271792.3            | 137340.0             | 544085.6        | 4166.0          | 4451.7           | 543.5           | 2215.2             | 1137109.9        | 51774.6           | 4186.8            | 106941.5            | 142733.1               | 314755.1       | 1392835.0      | 286352.3                | 1861047.6            |
| 1658.9                     | 4458.8             | 6970.5            | 8012.7           | 4757.6                   | 1883999.6           | 1098803.5         | 217995.1            | 110466.1             | 457386.7        | 3330.2          | 3838.5           | 450.9           | 1468.8             | 675919.8         | 44672.5           | 3565.3            | 84174.3             | 129864.1               | 245067.9       | 1127343.6      | 224906.6                | 1429045.7            |
| 1930.9                     | 5578.8             | 8416.9            | 8934.7           | 5130.3                   | 2032273.3           | 1278747.7         | 257749.6            | 127860.2             | 515020.3        | 3906.2          | 4464.0           | 539.8           | 2052.9             | 735435.5         | 44339.3           | 3989.7            | 100562.4            | 136450.2               | 313962.4       | 1434429.2      | 276104.8                | 1883924.9            |
| 1707.7                     | 47                 |                   |                  |                          |                     |                   |                     |                      |                 |                 |                  |                 |                    |                  |                   |                   |                     |                        |                |                |                         |                      |

| レチノール<br>活性当量<br>(μg) | Vitamin D     | Vitamin E             |                       |                       |                       | Vitamin K     | Vitamin B                  |                            |               |                 |                            |                             | 葉酸<br>(μg) | パントテン酸<br>(mg) | ビオチン<br>(μg) | Vitamin C     | アルコール<br>(g) | 硝酸イオン<br>(g) | テオブロミン<br>(g) | カフェイン<br>(g) | タンニン<br>(g) | ポリフェノール<br>(g) |
|-----------------------|---------------|-----------------------|-----------------------|-----------------------|-----------------------|---------------|----------------------------|----------------------------|---------------|-----------------|----------------------------|-----------------------------|------------|----------------|--------------|---------------|--------------|--------------|---------------|--------------|-------------|----------------|
|                       | ビタミンD<br>(μg) | α-<br>トコフェロール<br>(mg) | β-<br>トコフェロール<br>(mg) | γ-<br>トコフェロール<br>(mg) | δ-<br>トコフェロール<br>(mg) | ビタミンK<br>(μg) | ビタミンB <sub>1</sub><br>(mg) | ビタミンB <sub>2</sub><br>(mg) | ナイアシン<br>(mg) | ナイアシン当量<br>(mg) | ビタミンB <sub>6</sub><br>(mg) | ビタミンB <sub>12</sub><br>(μg) |            |                |              | ビタミンC<br>(mg) |              |              |               |              |             |                |
| 267065.6              | 4746.1        | 6019.7                | 260.8                 | 7840.9                | 1512.7                | 126107.3      | 513.8                      | 542.3                      | 8526.6        | 15681.7         | 709.3                      | 3449.8                      | 153750.5   | 2906.4         | 21112.8      | 58151.7       | 5902.5       | 62.8         | 0.0           | 46.2         | 219.7       | 0.8            |
| 285629.1              | 5546.0        | 6548.0                | 283.0                 | 9109.5                | 1713.3                | 125796.2      | 541.7                      | 555.8                      | 9264.7        | 16702.5         | 743.3                      | 3580.5                      | 157258.6   | 3013.7         | 22113.6      | 60545.8       | 8356.0       | 63.8         | 0.0           | 51.5         | 242.8       | 1.1            |
| 310713.2              | 6868.6        | 6869.2                | 266.2                 | 9277.2                | 1829.3                | 147200.3      | 588.4                      | 596.9                      | 9879.8        | 18028.0         | 823.3                      | 4338.4                      | 171154.2   | 3199.9         | 24944.5      | 64078.5       | 7850.5       | 70.3         | 0.0           | 40.0         | 182.9       | 1.1            |
| 297227.3              | 5700.2        | 5672.2                | 231.7                 | 6918.7                | 1406.8                | 131251.5      | 522.9                      | 556.4                      | 8705.1        | 16079.1         | 738.9                      | 3643.6                      | 156924.7   | 2974.7         | 22008.6      | 58479.2       | 7369.7       | 67.3         | 0.0           | 43.5         | 198.7       | 1.0            |
| 307848.7              | 4944.4        | 6153.7                | 258.8                 | 7052.6                | 1398.4                | 139265.2      | 517.4                      | 546.9                      | 8550.6        | 15578.1         | 714.9                      | 3646.6                      | 165475.9   | 2855.8         | 21884.0      | 64545.9       | 6683.0       | 67.6         | 0.0           | 53.1         | 256.9       | 0.7            |
| 294522.7              | 5635.2        | 6331.2                | 273.1                 | 8724.6                | 1728.6                | 145412.7      | 551.5                      | 562.1                      | 9317.6        | 16766.7         | 762.5                      | 3878.4                      | 167184.9   | 3033.1         | 22230.7      | 65004.1       | 7700.5       | 71.1         | 0.0           | 42.9         | 203.8       | 0.9            |
| 291611.7              | 5058.5        | 6024.1                | 244.1                 | 7925.8                | 1560.1                | 126919.0      | 533.0                      | 576.4                      | 8928.2        | 16437.0         | 733.2                      | 3371.5                      | 156681.4   | 3104.7         | 22700.8      | 56905.5       | 6705.7       | 59.6         | 0.0           | 42.4         | 193.1       | 0.7            |
| 286739.2              | 4818.9        | 5736.0                | 230.5                 | 7822.0                | 1511.8                | 123948.4      | 497.6                      | 502.3                      | 8157.0        | 14928.2         | 681.4                      | 3280.8                      | 146662.9   | 2760.3         | 20481.0      | 55752.6       | 6344.0       | 62.6         | 0.0           | 33.4         | 155.5       | 1.3            |
| 280533.3              | 4551.4        | 5700.6                | 249.9                 | 7652.8                | 1473.6                | 122513.4      | 483.7                      | 509.1                      | 7858.0        | 14278.1         | 673.5                      | 3506.4                      | 150454.0   | 2647.2         | 19404.7      | 60539.6       | 4503.8       | 64.0         | 0.0           | 43.3         | 207.2       | 0.7            |
| 297125.1              | 4451.5        | 5917.8                | 264.2                 | 7552.2                | 1459.7                | 127530.2      | 492.2                      | 515.7                      | 7892.3        | 14535.4         | 659.4                      | 3009.7                      | 153989.6   | 2706.5         | 20285.4      | 58322.8       | 6434.7       | 65.9         | 0.0           | 48.8         | 238.2       | 1.3            |
| 265929.3              | 4223.2        | 5285.5                | 241.9                 | 6902.9                | 1350.6                | 110477.3      | 467.4                      | 461.1                      | 7519.4        | 13809.1         | 647.2                      | 2895.2                      | 140564.1   | 2583.6         | 18257.2      | 54825.2       | 5486.4       | 55.7         | 0.0           | 42.6         | 205.0       | 0.9            |
| 304604.7              | 4416.0        | 5911.9                | 261.3                 | 7835.7                | 1517.7                | 131867.3      | 528.9                      | 544.5                      | 8708.7        | 15907.3         | 714.0                      | 3370.8                      | 159599.5   | 2940.6         | 20845.7      | 61337.7       | 6045.2       | 68.5         | 0.0           | 45.9         | 215.3       | 0.7            |
| 331853.6              | 5390.9        | 6418.5                | 263.9                 | 7677.8                | 1471.2                | 142114.9      | 545.9                      | 596.4                      | 9264.7        | 16749.3         | 767.1                      | 4258.5                      | 175521.7   | 3104.9         | 22643.8      | 70011.2       | 5435.2       | 78.0         | 0.0           | 53.4         | 255.0       | 1.4            |
| 290408.9              | 4268.8        | 5578.3                | 232.7                 | 6846.1                | 1325.9                | 128062.1      | 498.1                      | 522.9                      | 8093.0        | 14795.0         | 679.3                      | 3365.8                      | 157430.1   | 2770.3         | 19789.1      | 62455.1       | 5837.6       | 67.1         | 0.0           | 48.3         | 226.9       | 1.0            |
| 323224.7              | 4601.5        | 6433.3                | 282.8                 | 7757.3                | 1483.4                | 141921.6      | 555.4                      | 567.9                      | 9125.2        | 16592.0         | 741.4                      | 3618.5                      | 172435.8   | 3038.4         | 21585.9      | 66057.6       | 6257.5       | 71.1         | 0.0           | 67.4         | 317.6       | 0.8            |
| 321826.7              | 6477.7        | 6853.5                | 275.3                 | 8646.9                | 1701.6                | 138706.5      | 597.2                      | 606.6                      | 9681.9        | 17569.9         | 820.1                      | 4301.2                      | 179807.9   | 3278.9         | 24498.3      | 71403.2       | 7558.3       | 67.4         | 0.0           | 52.6         | 249.7       | 0.5            |
| 295528.6              | 5471.2        | 6076.7                | 249.9                 | 6509.3                | 1304.6                | 123352.0      | 555.5                      | 588.9                      | 8930.0        | 16453.2         | 737.9                      | 3599.9                      | 163196.2   | 3023.1         | 22482.5      | 62071.9       | 5865.1       | 64.9         | 0.0           | 47.4         | 232.3       | 0.5            |
| 282418.8              | 4865.2        | 6013.4                | 259.6                 | 7013.0                | 1382.9                | 120890.1      | 510.0                      | 560.7                      | 7970.6        | 15092.7         | 691.1                      | 3284.6                      | 154103.4   | 2904.4         | 21738.8      | 57956.6       | 5161.4       | 59.9         | 0.0           | 44.7         | 217.9       | 0.6            |
| 262111.0              | 4452.0        | 6069.8                | 257.9                 | 6913.3                | 1307.9                | 120922.8      | 478.7                      | 534.2                      | 7479.3        | 14336.2         | 642.7                      | 2930.2                      | 145239.5   | 2816.5         | 21230.7      | 50372.0       | 4472.0       | 52.7         | 0.0           | 49.8         | 250.9       | 0.6            |
| 306878.5              | 4802.5        | 6097.4                | 276.8                 | 8321.4                | 1629.2                | 140072.7      | 533.4                      | 521.7                      | 8758.7        | 15949.6         | 716.3                      | 3899.9                      | 159343.3   | 2863.1         | 20466.6      | 60923.9       | 5374.1       | 74.4         | 0.0           | 46.6         | 226.6       | 0.7            |
| 280281.9              | 4833.4        | 5854.9                | 248.5                 | 7974.7                | 1534.6                | 129878.3      | 487.7                      | 518.2                      | 7932.6        | 14579.4         | 672.3                      | 3366.6                      | 149995.8   | 2732.7         | 20557.4      | 59276.9       | 6227.9       | 66.5         | 0.0           | 39.8         | 180.5       | 0.4            |
| 262589.5              | 4315.9        | 5694.4                | 242.7                 | 7613.4                | 1480.2                | 112113.9      | 493.3                      | 515.0                      | 7798.7        | 14813.5         | 664.3                      | 2974.5                      | 140148.1   | 2639.5         | 20515.4      | 52471.3       | 4692.9       | 55.1         | 0.0           | 40.3         | 191.7       | 0.7            |
| 360437.8              | 5031.5        | 7037.5                | 338.9                 | 7534.0                | 1486.3                | 152848.3      | 588.9                      | 598.4                      | 9564.1        | 17532.2         | 799.9                      | 3859.2                      | 188579.3   | 3238.3         | 22622.7      | 71348.8       | 5256.4       | 68.2         | 0.0           | 74.4         | 367.8       | 0.6            |
| 285982.7              | 4263.6        | 5875.3                | 253.3                 | 7216.6                | 1416.3                | 114941.2      | 512.0                      | 533.0                      | 8339.2        | 15539.3         | 710.0                      | 3322.2                      | 154865.6   | 2933.2         | 20852.9      | 58596.5       | 5200.2       | 59.8         | 0.0           | 46.9         | 223.7       | 0.7            |
| 296980.0              | 4835.1        | 6324.6                | 274.2                 | 7631.3                | 1433.4                | 115666.1      | 498.2                      | 560.1                      | 8219.7        | 15570.8         | 712.5                      | 3299.3                      | 152330.9   | 3004.1         | 22067.6      | 59942.2       | 4803.4       | 55.3         | 0.0           | 47.0         | 234.4       | 0.6            |
| 274362.2              | 4515.2        | 6052.6                | 281.9                 | 7499.4                | 1414.3                | 121582.9      | 486.4                      | 543.1                      | 8012.3        | 15036.0         | 667.0                      | 3083.0                      | 149746.0   | 2889.5         | 20713.5      | 53566.2       | 5123.0       | 55.9         | 0.0           | 59.9         | 287.2       | 0.9            |
| 301292.0              | 4777.9        | 6791.4                | 319.4                 | 8072.9                | 1514.9                | 137841.9      | 544.1                      | 604.5                      | 9030.8        | 16792.2         | 756.2                      | 3599.8                      | 176573.4   | 3237.6         | 23193.3      | 63974.0       | 6180.5       | 72.3         | 0.0           | 69.2         | 333.2       | 0.8            |
| 277260.1              | 4453.4        | 5801.7                | 240.5                 | 7017.7                | 1336.2                | 116429.6      | 499.4                      | 548.7                      | 8466.0        | 15675.4         | 695.5                      | 3024.2                      | 149458.8   | 2944.0         | 21138.3      | 54876.2       | 5719.9       | 63.2         | 0.0           | 45.6         | 209.9       | 0.8            |
| 258636.9              | 4115.7        | 5472.2                | 241.8                 | 6204.8                | 1179.7                | 119439.4      | 471.4                      | 520.6                      | 7891.3        | 14671.1         | 647.3                      | 2885.6                      | 144329.5   | 2773.3         | 19964.6      | 54602.0       | 5110.5       | 56.3         | 0.0           | 59.5         | 273.7       | 0.7            |
| 321713.2              | 4854.6        | 7500.1                | 371.2                 | 8338.5                | 1543.4                | 151237.1      | 555.4                      | 623.8                      | 8993.1        | 16995.7         | 774.2                      | 3228.7                      | 183565.0   | 3324.2         | 23801.7      | 65700.0       | 5495.1       | 67.0         | 0.0           | 86.7         | 436.5       | 0.6            |
| 280028.9              | 4908.1        | 6108.6                | 253.4                 | 7361.6                | 1385.8                | 122150.8      | 517.1                      | 550.7                      | 8783.1        | 16194.9         | 725.4                      | 3442.1                      | 150689.6   | 2963.4         | 21727.8      | 56658.5       | 4390.9       | 61.8         | 0.0           | 41.8         | 198.7       | 1.9            |
| 292340.8              | 5943.6        | 6974.8                | 284.1                 | 9527.0                | 1806.9                | 127941.9      | 532.5                      | 636.6                      | 8796.4        | 16529.1         | 725.7                      | 4312.8                      | 153474.4   | 3096.1         | 24870.7      | 58811.3       | 5802.9       | 56.9         | 0.0           | 49.1         | 226.9       | 0.8            |
| 297429.6              | 5596.5        | 6668.7                | 287.1                 | 8182.5                | 1558.5                | 144782.0      | 535.3                      | 618.1                      | 8693.7        | 16406.4         | 748.1                      | 4040.6                      | 164369.8   | 3113.5         | 24099.7      | 58475.2       | 6766.5       | 63.6         | 0.0           | 59.1         | 284.4       | 0.8            |
| 248462.0              | 4287.9        | 5554.2                | 235.1                 | 7521.9                | 1429.7                | 106118.5      | 469.6                      | 506.6                      | 7879.9        | 14583.2         | 633.2                      | 3164.5                      | 130889.6   | 2638.8         | 19797.1      | 49958.3       | 5164.5       | 54.1         | 0.0           | 40.1         | 179.0       | 0.8            |
| 293024.0              | 4684.8        | 6499.8                | 301.6                 | 8722.3                | 1692.5                | 131800.8      | 518.5                      | 572.4                      | 8494.5        | 15774.6         | 727.7                      | 3535.9                      | 162286.0   | 3035.2         | 21615.0      | 61106.5       | 6622.2       | 66.8         | 0.0           | 56.4         | 269.9       | 0.8            |
| 268622.0              | 5044.7        | 5937.2                | 235.1                 | 8057.4                | 1557.4                | 109909.2      | 491.8                      | 543.8                      | 8299.8        | 15384.2         | 687.9                      | 3262.3                      | 139928.2   | 2848.0         | 21198.0      | 52067.1       | 6545.4       | 55.5         | 0.0           | 34.6         | 158.2       | 0.7            |
| 257526.1              | 3781.2        | 5152.7                | 212.7                 | 6497.9                | 1286.4                | 118735.4      | 476.1                      | 497.5                      | 7795.8        | 14435.7         | 668.3                      | 2918.4                      | 145525.2   | 2755.7         | 19381.8      | 57707.0       | 6117.5       | 62.5         | 0.0           | 40.6         | 184.6       | 0.7            |
| 275893.8              | 4339.7        | 5704.6                | 252.6                 | 7125.8                | 1366.6                | 113507.4      | 487.0                      | 547.2                      | 7748.2        | 14709.1         | 678.3                      | 3571.9                      | 146682.6   | 2896.5         | 21076.8      | 55996.6       | 4850.9       | 58.6         | 0.0           | 39.2         | 178.0       | 0.8            |
| 271991.0              | 4403.5        | 6056.6                | 262.6                 | 8358.4                | 1611.3                | 108857.3      | 487.8                      | 541.3                      | 7835.1        | 14896.3         | 673.5                      | 3061.5                      | 140111.4   | 2897.4         | 21335.7      | 51923.0       | 5170.9       | 51.4         | 0.0           | 40.8         | 188.6       | 0.5            |
| 269378.8              | 4544.0        | 5949.0                | 244.2                 | 7800.9                | 1476.5                | 120805.9      | 465.4                      | 508.1                      | 8921.8        | 15858.6         | 693.6                      | 3433.2                      | 143755.1   | 2705.8         | 20602.3      | 52521.3       | 7121.5       | 60.5         | 0.0           | 41.3         | 192.9       | 0.5            |
| 270576.6              | 4177.6        | 5727.4                | 229.9                 | 7393.0                | 1393.1                | 122751.0      | 509.7                      | 528.3                      | 8993.5        | 16175.0         | 701.9                      | 3056.0                      | 142301.8   | 2910.8         | 20148.7      | 53746.2       | 5326.6       | 58.2         | 0.0           | 45.0         | 208.1       | 0.5            |
| 283397.9              | 5049.0        | 6862.9                | 315.2                 | 10353.2               | 1992.7                | 144963.4      | 552.5                      | 561.2                      | 9160.0        | 16957.8         | 773.8                      | 3913.2                      | 163335.8   | 3205.2         | 22525.7      | 59889.1       | 6325.7       | 65.8         | 0.0           | 46.5         | 227.5       | 0.8            |
| 267235.3              | 4411.5        | 6291.9                | 273.6                 | 9173.1                | 1756.4                | 130215.5      | 504.7                      | 524.7                      | 8314.4        | 15413.1         | 693.1                      | 3358.3                      | 147103.3   | 2885.6         | 20978.5      | 56079.5       | 5695.6       | 56.6         | 0.0           | 43.7         | 209.4       | 0.9            |
| 272960.1              | 3958.0        | 6620.2                | 305.1                 | 9168.6                | 1725.9                | 131183.7      | 490.4                      | 519.3                      | 8236.0        | 15182.7         | 673.3                      | 2823.0                      | 150377.0   | 2848.4         | 20704.3      | 55014.1       | 6318.7       | 54.2         | 0.0           | 52.1         | 262.2       | 0.6            |
| 280120.2              | 4752.0        | 6531.0                | 284.6                 | 9037.3                | 1744.3                | 136278.3      | 511.5                      | 562.7                      | 8643.2        | 15945.7         | 723.1                      | 3267.5                      | 154719.5   | 2999.3         | 22040.1      | 56653.5       | 6355.4       | 61.4         | 0.0           | 48.5         | 233.6       | 0.4            |
| 266253.5              | 3814.9        | 5496.7                | 236.5                 | 7508.1                | 1440.6                | 114651.8      | 450.0                      | 494.0                      | 7680.7        | 13988.5         | 634.4                      | 2843.3                      | 139721.5   | 2605.4         | 18690.4      | 53223.2       | 7639.8       | 60.2         | 0.0           | 41.8         | 199.3       | 0.7            |
| 274646.2              | 4104.3        | 6445.0                | 301.0                 | 9904.8                | 1891.5                | 124466.5      | 483.1                      | 502.1                      | 8028.0        | 14689.7         | 666.7                      | 3064.2                      | 145450.2   | 2677.6         |              |               |              |              |               |              |             |                |

| 酢酸<br>(g) | 調理油<br>(g) | 有機酸<br>(g) | 重量変化率<br>(%) | 備考欄<br>(メモ欄) | イソロイシン(mg) | ロイシン<br>(mg) | リシン<br>(mg) | 含硫アミノ酸        |              |                      | 芳香族アミノ酸              |              |                       | トレオニン<br>(mg) | トリプトファン<br>(mg) | バリン<br>(mg) | ヒスチジン<br>(mg) | アルギニン<br>(mg) | アラニン<br>(mg) | アスパラギン酸<br>(mg) | グルタミン酸<br>(mg) | グリシン<br>(mg) |
|-----------|------------|------------|--------------|--------------|------------|--------------|-------------|---------------|--------------|----------------------|----------------------|--------------|-----------------------|---------------|-----------------|-------------|---------------|---------------|--------------|-----------------|----------------|--------------|
|           |            |            |              |              |            |              |             | メチオニン<br>(mg) | シスチン<br>(mg) | 含硫<br>アミノ酸合計<br>(mg) | フェニル<br>アラニン<br>(mg) | チロニン<br>(mg) | 芳香族<br>アミノ酸合計<br>(mg) |               |                 |             |               |               |              |                 |                |              |
| 189.0     | 0.0        | 1013.9     | 0.0          | 0.0          | 1482786.3  | 2672752.9    | 2188814.5   | 792643.5      | 531828.9     | 1326372.2            | 1570107.3            | 1236112.4    | 2828113.3             | 1385713.0     | 418329.5        | 1787814.4   | 1134833.2     | 2067107.6     | 1724552.5    | 3104193.3       | 6461237.5      | 1536070.0    |
| 206.1     | 0.0        | 981.1      | 0.0          | 0.0          | 1547678.9  | 2789008.4    | 2315600.4   | 840699.8      | 553298.0     | 1395159.6            | 1626275.6            | 1292183.4    | 2942337.9             | 1454692.2     | 436059.6        | 1872493.4   | 1172810.2     | 2209575.3     | 1839730.7    | 3260572.8       | 6595328.4      | 1655162.4    |
| 222.7     | 0.0        | 1171.3     | 0.0          | 0.0          | 1707556.5  | 3073072.3    | 2553127.0   | 924436.4      | 612644.0     | 1538243.4            | 1801382.2            | 1417143.3    | 3244173.2             | 1608150.0     | 481339.2        | 2054638.9   | 1290016.5     | 2440373.9     | 2033985.3    | 3640391.0       | 7286522.6      | 1850889.1    |
| 157.6     | 0.0        | 1064.7     | 0.0          | 0.0          | 1532622.8  | 2765403.9    | 2254607.8   | 816432.4      | 549239.5     | 1367663.2            | 1629217.1            | 1277947.7    | 2928858.5             | 1430669.5     | 434604.3        | 1850517.3   | 1174774.6     | 2128710.8     | 1774320.3    | 3212870.6       | 6707211.6      | 1587774.8    |
| 159.2     | 0.0        | 1046.1     | 0.0          | 0.0          | 1455562.3  | 2616088.3    | 2163612.1   | 775935.0      | 517952.4     | 1295396.8            | 1535601.4            | 1217095.6    | 2774097.4             | 1364982.5     | 412406.1        | 1757804.4   | 1131882.8     | 2027013.3     | 1690527.9    | 3076819.3       | 6263070.9      | 1504397.6    |
| 178.1     | 0.0        | 1078.1     | 0.0          | 0.0          | 1555107.4  | 2798929.0    | 2324181.9   | 833206.8      | 547925.7     | 1382867.7            | 1636940.1            | 1289644.8    | 2947510.6             | 1460055.1     | 438284.5        | 1874555.9   | 1191324.6     | 2193866.9     | 1838897.9    | 3305638.8       | 6652567.1      | 1642066.0    |
| 206.1     | 0.0        | 1111.1     | 0.0          | 0.0          | 1568608.8  | 2830698.6    | 2298341.6   | 830164.9      | 562071.2     | 1394562.4            | 1663881.7            | 1306890.2    | 2994338.0             | 1460522.5     | 440907.4        | 1898592.5   | 1185353.7     | 2178342.3     | 1816663.1    | 3298893.9       | 6794577.7      | 1612075.5    |
| 181.2     | 0.0        | 1007.3     | 0.0          | 0.0          | 1405947.0  | 2536842.0    | 2070290.9   | 755659.9      | 509755.4     | 1266606.0            | 1491962.0            | 1176141.1    | 2691358.7             | 1319100.3     | 399866.2        | 1709956.3   | 1087391.7     | 1989647.4     | 1651870.4    | 3007155.8       | 6017540.1      | 1458598.5    |
| 158.9     | 0.0        | 1004.9     | 0.0          | 0.0          | 1334978.6  | 2400326.9    | 1998467.8   | 710263.4      | 465736.5     | 1177910.0            | 1401741.2            | 1100405.0    | 2531076.0             | 1541296.7     | 3757178.9       | 1609694.5   | 1052433.6     | 1823213.0     | 2791990.4    | 5799757.2       | 1366441.9      | 1549256.6    |
| 154.3     | 0.0        | 984.7      | 0.0          | 0.0          | 1378169.4  | 2476265.4    | 2029047.9   | 712698.5      | 493867.2     | 1224176.0            | 1458386.4            | 1148218.3    | 2626271.5             | 1286009.4     | 389018.9        | 1662775.0   | 1064252.2     | 1897500.9     | 1583823.5    | 2873477.8       | 6035446.0      | 1404718.7    |
| 179.8     | 0.0        | 987.8      | 0.0          | 0.0          | 1295267.4  | 2342599.4    | 1880875.4   | 685535.9      | 473064.3     | 1160338.7            | 1387688.3            | 1063528.6    | 2489296.8             | 1205226.0     | 367969.8        | 1571364.5   | 1004168.1     | 1809735.2     | 1496612.2    | 2717815.7       | 5797829.9      | 1337938.3    |
| 169.0     | 0.0        | 1038.7     | 0.0          | 0.0          | 1493401.3  | 2692935.9    | 2199936.8   | 788833.5      | 532107.9     | 1323351.0            | 1583664.9            | 1245503.5    | 2848863.2             | 1391258.8     | 421372.0        | 1802236.3   | 1150021.8     | 2068068.2     | 1722013.4    | 3101801.5       | 6625433.1      | 1538472.0    |
| 183.2     | 0.0        | 1163.6     | 0.0          | 0.0          | 1557396.3  | 2796901.6    | 2338088.0   | 830944.6      | 540522.9     | 1374026.8            | 1630565.5            | 1294566.8    | 2944161.9             | 1457178.7     | 437374.2        | 1878237.7   | 1227020.9     | 2127734.6     | 1797121.2    | 3268379.5       | 6703277.5      | 1585281.5    |
| 193.7     | 0.0        | 1028.6     | 0.0          | 0.0          | 1385659.0  | 2495261.5    | 2066962.6   | 734955.5      | 485487.1     | 1222919.5            | 1460468.3            | 1158189.8    | 2636974.0             | 1293854.8     | 391004.1        | 1671579.1   | 1071801.4     | 1910025.6     | 1598856.9    | 2903670.8       | 6056865.0      | 1425635.4    |
| 188.4     | 0.0        | 1076.9     | 0.0          | 0.0          | 1541118.1  | 2779409.3    | 2296459.5   | 820444.9      | 544530.8     | 1367471.8            | 1627595.9            | 1288598.5    | 2936831.7             | 1440115.4     | 434778.9        | 1858638.0   | 1204475.1     | 2143303.3     | 1787716.6    | 3227654.3       | 6785996.5      | 1606060.0    |
| 165.4     | 0.0        | 1125.1     | 0.0          | 0.0          | 1638799.2  | 2950264.3    | 2446073.3   | 862855.4      | 586321.7     | 1470532.5            | 1730486.6            | 1366591.8    | 3123082.4             | 1541144.4     | 462767.1        | 1981420.0   | 1224396.3     | 2339806.8     | 1945821.0    | 3542850.2       | 6966151.2      | 1746087.6    |
| 185.6     | 0.0        | 1052.5     | 0.0          | 0.0          | 1560321.0  | 2805629.1    | 2322589.3   | 831248.6      | 550876.1     | 1384414.6            | 1645443.3            | 1298096.4    | 2967827.9             | 1455239.2     | 438024.4        | 1875098.8   | 1213170.8     | 2148564.1     | 1796489.5    | 3262815.3       | 6767148.7      | 1605202.7    |
| 154.0     | 0.0        | 997.1      | 0.0          | 0.0          | 1468281.4  | 2647579.2    | 2151486.7   | 779909.0      | 530974.2     | 1312732.5            | 1563209.8            | 1228196.2    | 2813136.1             | 1366445.3     | 414846.7        | 1771192.8   | 1102008.7     | 2031891.3     | 1683508.2    | 3061918.3       | 6480181.5      | 1499256.6    |
| 155.0     | 0.0        | 878.6      | 0.0          | 0.0          | 1399448.2  | 2537008.9    | 2012048.7   | 754388.8      | 532339.3     | 1278805.9            | 1499803.8            | 1179109.5    | 2704357.6             | 1305901.0     | 399944.2        | 1709419.5   | 1021159.2     | 1990415.0     | 1630243.0    | 2940734.7       | 6013095.3      | 1427178.4    |
| 191.8     | 0.0        | 1004.5     | 0.0          | 0.0          | 1493091.2  | 2690209.4    | 2230537.7   | 799630.1      | 528534.3     | 1330077.9            | 1576172.2            | 1242414.1    | 2838747.6             | 1402025.6     | 422064.6        | 1805723.0   | 1176488.6     | 2109863.7     | 1758268.8    | 3161381.5       | 6436747.6      | 1575024.9    |
| 194.1     | 0.0        | 1071.4     | 0.0          | 0.0          | 1385787.4  | 2496456.9    | 2028335.8   | 734282.0      | 497308.4     | 1233193.7            | 1469443.5            | 1156979.7    | 2646128.4             | 1292021.1     | 390949.8        | 1675107.7   | 1051044.0     | 1900880.4     | 1594996.1    | 2987597.7       | 6114632.4      | 1418275.8    |
| 193.0     | 0.0        | 916.6      | 0.0          | 0.0          | 1438783.7  | 2606923.5    | 2079879.9   | 769992.4      | 532346.0     | 1304033.6            | 1543213.8            | 1210496.3    | 2777437.3             | 1341068.8     | 110890.9        | 1750339.4   | 1088014.8     | 2035251.3     | 1608461.4    | 6282007.4       | 179874.1       | 1499256.6    |
| 196.6     | 0.0        | 1088.8     | 0.0          | 0.0          | 1622527.8  | 2936035.5    | 2413101.2   | 872070.6      | 576710.6     | 1451315.3            | 1720755.1            | 1362590.0    | 3105958.7             | 1522344.3     | 462694.5        | 1790894.7   | 1295561.0     | 2230747.2     | 1896390.9    | 3437915.3       | 6964601.0      | 1686679.5    |
| 141.9     | 0.0        | 1015.7     | 0.0          | 0.0          | 1473386.2  | 2663110.3    | 2144450.0   | 78380.2       | 540404.8     | 1326166.2            | 1575476.1            | 1239714.5    | 2836966.1             | 1371412.8     | 419964.6        | 1784140.4   | 1134983.0     | 2068606.6     | 1698345.4    | 3070630.4       | 6522624.1      | 1522607.1    |
| 204.0     | 0.0        | 990.4      | 0.0          | 0.0          | 1515711.4  | 2734402.6    | 2216288.5   | 815426.8      | 553451.9     | 1370510.5            | 1609171.6            | 1266848.4    | 2899168.4             | 1412307.8     | 428246.7        | 1838135.6   | 171487.0      | 2104535.7     | 1746354.9    | 3142075.3       | 6564186.4      | 1538719.2    |
| 175.0     | 0.0        | 988.2      | 0.0          | 0.0          | 1446980.0  | 2615017.3    | 2116163.5   | 769677.2      | 523220.0     | 1295312.6            | 1539620.9            | 1209802.7    | 2769514.7             | 1343684.8     | 407934.5        | 1745771.0   | 1091149.4     | 1984699.9     | 1654525.0    | 2968110.2       | 6467414.1      | 1474381.9    |
| 194.1     | 0.0        | 1107.0     | 0.0          | 0.0          | 1593434.0  | 2883678.4    | 2314431.3   | 846208.2      | 584810.7     | 1433404.2            | 1701842.9            | 1336098.0    | 3059931.6             | 1481045.2     | 451101.5        | 1926154.3   | 1189906.7     | 2202896.4     | 1826817.4    | 3280664.8       | 7169202.2      | 1627461.0    |
| 203.8     | 0.0        | 983.4      | 0.0          | 0.0          | 1484800.6  | 2675145.2    | 2192635.8   | 794164.5      | 537505.4     | 1333782.0            | 1571295.0            | 1242761.3    | 2834822.4             | 1386321.6     | 419546.9        | 1788898.6   | 1127866.7     | 2059095.4     | 1711997.7    | 3065485.4       | 6536382.2      | 1525714.6    |
| 199.7     | 0.0        | 982.6      | 0.0          | 0.0          | 1402718.2  | 2534599.8    | 2045153.4   | 742588.9      | 507457.0     | 1252313.0            | 1493664.7            | 1171102.1    | 2682209.6             | 1302099.2     | 395329.9        | 1688545.9   | 1065517.2     | 1916537.3     | 1599348.2    | 2871259.5       | 6321187.7      | 1427770.4    |
| 239.7     | 0.0        | 1079.6     | 0.0          | 0.0          | 1628539.7  | 2946260.2    | 2373400.0   | 873290.2      | 596548.3     | 1472233.4            | 1735783.8            | 1366828.4    | 3127276.4             | 1514468.3     | 482453.3        | 1972057.4   | 1227897.9     | 226561.6      | 1874380.4    | 3358315.5       | 7188152.5      | 1668856.4    |
| 224.2     | 0.0        | 1043.9     | 0.0          | 0.0          | 1534540.2  | 2757820.9    | 2302535.8   | 831031.2      | 550735.7     | 1383300.0            | 1612944.6            | 1274090.6    | 2907968.9             | 1442260.5     | 432523.0        | 1844209.8   | 1199569.5     | 2140565.1     | 1794088.6    | 3196327.6       | 6624629.6      | 1605474.6    |
| 187.7     | 0.0        | 1020.1     | 0.0          | 0.0          | 1610233.8  | 2887478.2    | 2407686.2   | 868360.1      | 573717.0     | 1443449.1            | 1688011.6            | 1337345.4    | 3048361.1             | 1508093.8     | 450812.4        | 1927737.7   | 1193152.9     | 2224479.5     | 1860619.1    | 3353969.6       | 6859758.1      | 1655615.6    |
| 181.4     | 0.0        | 1060.2     | 0.0          | 0.0          | 1613919.3  | 2898864.3    | 2395173.3   | 863384.5      | 573582.3     | 1438723.3            | 1699048.8            | 1331311.4    | 3051348.4             | 1509149.0     | 450271.7        | 1939487.3   | 1215439.9     | 2221551.8     | 1867947.5    | 3356731.4       | 6949472.0      | 1644877.3    |
| 197.5     | 0.0        | 912.4      | 0.0          | 0.0          | 1392102.9  | 2496282.6    | 2069528.8   | 742207.6      | 499138.7     | 1242778.5            | 1466428.5            | 1156461.8    | 2641688.9             | 1299670.4     | 390180.6        | 1664919.5   |               |               |              |                 |                |              |



| 飽和脂肪酸        |             |                       |                |               |              |                         |                         |                   |                     |                      |                      |                      |                       |                        |                        |                             |                                 |                        |                            |                             |                                 |                        |
|--------------|-------------|-----------------------|----------------|---------------|--------------|-------------------------|-------------------------|-------------------|---------------------|----------------------|----------------------|----------------------|-----------------------|------------------------|------------------------|-----------------------------|---------------------------------|------------------------|----------------------------|-----------------------------|---------------------------------|------------------------|
| プロリン<br>(mg) | セリン<br>(mg) | ヒドロキシ<br>プロリン<br>(mg) | アミノ酸合計<br>(mg) | アンモニア<br>(mg) | 脂肪酸総量<br>(g) | n-3系<br>多価不飽和<br>脂肪酸(g) | n-6系<br>多価不飽和<br>脂肪酸(g) | 4:0<br>酪酸<br>(mg) | 6:0<br>ヘキサ酸<br>(mg) | 7:0<br>ヘプタン酸<br>(mg) | 8:0<br>オクタン酸<br>(mg) | 10:0<br>デカン酸<br>(mg) | 12:0<br>ラウリン酸<br>(mg) | 13:0<br>トリデカン酸<br>(mg) | 14:0<br>ミリスチン酸<br>(mg) | 15:0<br>ペンタ<br>デカン酸<br>(mg) | 15:0 ant<br>ペンタ<br>デカン酸<br>(mg) | 16:0<br>パルミチン酸<br>(mg) | 16:0 iso<br>パルミチン酸<br>(mg) | 17:0<br>ヘプタ<br>デカン酸<br>(mg) | 17:0 ant<br>ヘプタ<br>デカン酸<br>(mg) | 18:0<br>ステアリン酸<br>(mg) |
| 2028451.3    | 1714161.2   | 123988.4              | 3397960.1      | 690457.9      | 36254.0      | 1404.2                  | 6732.9                  | 135901.9          | 88994.2             | 803.3                | 57039.9              | 130865.2             | 224694.9              | 2409.9                 | 829912.4               | 78135.8                     | 20303.5                         | 7078864.2              | 9710.8                     | 103478.2                    | 19303.7                         | 2915132.5              |
| 2055895.9    | 1787031.1   | 142549.8              | 35514890.8     | 702867.0      | 40188.8      | 1660.1                  | 7772.5                  | 130013.3          | 84917.4             | 714.2                | 54198.2              | 126402.1             | 219075.7              | 2142.6                 | 847192.4               | 76103.1                     | 19402.5                         | 7617629.1              | 9214.1                     | 102815.2                    | 18445.3                         | 3198682.8              |
| 2245273.3    | 1877143.7   | 149558.2              | 39208234.4     | 787988.4      | 41057.1      | 1837.9                  | 7907.7                  | 119816.1          | 78495.5             | 690.3                | 51201.3              | 119973.5             | 220466.5              | 2070.9                 | 866513.9               | 77737.5                     | 17874.3                         | 7771051.0              | 8546.2                     | 109863.6                    | 16984.3                         | 3254561.9              |
| 2111575.6    | 1774502.6   | 120308.6              | 35168742.1     | 734023.3      | 33721.1      | 1444.1                  | 6169.8                  | 143424.3          | 93962.2             | 878.6                | 59770.5              | 135784.7             | 227554.0              | 2635.8                 | 846548.6               | 77427.9                     | 21427.2                         | 6676339.3              | 10297.3                    | 98664.5                     | 20349.8                         | 2754468.3              |
| 1972818.0    | 1692660.0   | 119468.9              | 33338266.2     | 686525.9      | 33625.0      | 1372.3                  | 6206.5                  | 132776.5          | 86732.0             | 746.9                | 54621.3              | 126446.9             | 209754.9              | 2240.7                 | 794985.6               | 73008.9                     | 19855.9                         | 6641598.0              | 9417.4                     | 94554.5                     | 18922.1                         | 2778012.6              |
| 2070125.2    | 1782433.1   | 132128.1              | 35628106.0     | 721438.1      | 37690.6      | 1718.8                  | 7334.3                  | 128924.0          | 84416.7             | 788.7                | 53358.2              | 123524.4             | 207942.6              | 2366.1                 | 832965.5               | 76010.6                     | 19271.7                         | 7104357.4              | 9248.8                     | 100820.2                    | 18303.6                         | 2960778.3              |
| 2142358.0    | 1821834.2   | 125876.8              | 35860597.0     | 738087.6      | 37955.6      | 1504.7                  | 6888.5                  | 149967.2          | 98026.1             | 918.2                | 60018.9              | 139734.8             | 215041.5              | 2754.6                 | 906785.9               | 86740.9                     | 22430.8                         | 7414854.0              | 10753.7                    | 114217.7                    | 21357.8                         | 3059546.0              |
| 1873894.9    | 1642076.8   | 114367.0              | 32258044.7     | 665348.7      | 33785.1      | 1446.1                  | 6623.2                  | 117328.7          | 76706.4             | 690.2                | 47991.5              | 112112.4             | 184921.5              | 2070.6                 | 725022.9               | 66753.0                     | 17560.1                         | 6381265.5              | 8362.5                     | 89096.1                     | 16728.4                         | 2673544.9              |
| 1837969.8    | 1536229.9   | 110776.6              | 30555648.2     | 630611.5      | 33178.4      | 1438.4                  | 6378.9                  | 138176.5          | 90268.8             | 802.8                | 56472.3              | 126987.4             | 206991.5              | 2408.4                 | 781087.6               | 73171.1                     | 20696.1                         | 6307266.0              | 9823.4                     | 90952.7                     | 19692.1                         | 2645533.9              |
| 1901611.8    | 1604471.8   | 111249.8              | 31569737.5     | 656546.2      | 33553.2      | 1376.3                  | 6442.5                  | 126716.1          | 83036.1             | 754.2                | 53938.6              | 122705.9             | 215301.0              | 2262.6                 | 753450.8               | 69639.1                     | 18989.9                         | 6472777.3              | 9031.8                     | 90116.3                     | 18033.8                         | 2700304.6              |
| 1816424.3    | 1504111.1   | 101888.1              | 29917226.2     | 636101.9      | 30184.6      | 1275.4                  | 5870.0                  | 118003.8          | 77160.6             | 682.6                | 48840.4              | 112285.8             | 178109.2              | 2047.8                 | 686156.6               | 63826.4                     | 17654.9                         | 5789429.5              | 9395.1                     | 81826.0                     | 16808.2                         | 2411697.3              |
| 2090730.9    | 1720904.3   | 125948.7              | 34339092.5     | 711541.3      | 36855.5      | 1420.3                  | 6774.8                  | 149286.0          | 97682.1             | 866.1                | 62257.9              | 142465.4             | 241270.6              | 2598.3                 | 873580.0               | 81849.6                     | 22290.6                         | 7252535.8              | 10648.0                    | 105363.4                    | 21211.9                         | 3007352.5              |
| 2114129.5    | 1784445.2   | 184220.8              | 35526465.2     | 722500.1      | 70214.3      | 1515.7                  | 6573.8                  | 199107.2          | 141993.2            | 34758.4              | 102982.3             | 155284.3             | 259395.3              | 36709.2                | 927388.1               | 88215.7                     | 58470.9                         | 7188801.1              | 45598.5                    | 107477.6                    | 57223.1                         | 2944431.5              |
| 1915814.9    | 1590838.5   | 117877.6              | 31779531.9     | 649841.5      | 33828.1      | 1285.4                  | 6008.9                  | 149648.8          | 97687.5             | 819.4                | 61749.2              | 140895.5             | 232244.0              | 2458.2                 | 849180.8               | 80275.8                     | 22328.9                         | 6771230.1              | 10604.0                    | 101356.9                    | 21249.1                         | 2804604.2              |
| 2129255.1    | 1768744.7   | 134266.8              | 35457640.2     | 724818.9      | 37957.1      | 1447.0                  | 6755.1                  | 154353.6          | 100908.9            | 838.1                | 65404.6              | 148692.3             | 261388.4              | 2514.3                 | 924988.7               | 86249.3                     | 23016.8                         | 7580018.6              | 10933.3                    | 112829.7                    | 21891.7                         | 3159477.2              |
| 2162555.5    | 1899992.7   | 137947.5              | 37801527.1     | 769410.7      | 37852.9      | 1704.6                  | 7372.4                  | 127645.5          | 83691.7             | 769.8                | 54568.3              | 125483.7             | 225580.7              | 2309.4                 | 832165.8               | 74593.6                     | 19135.3                         | 7244197.7              | 9110.2                     | 101337.2                    | 18161.6                         | 3037382.8              |
| 2134955.6    | 1799922.1   | 128580.9              | 35669140.1     | 737399.6      | 34715.7      | 1464.3                  | 5903.1                  | 143641.1          | 94198.8             | 882.8                | 60416.5              | 138666.8             | 237701.7              | 2648.4                 | 895194.4               | 84155.7                     | 21485.0                         | 7086005.3              | 10304.9                    | 115567.7                    | 20444.4                         | 2937526.0              |
| 2043995.4    | 1713198.1   | 115385.9              | 33666755.9     | 700744.9      | 34370.0      | 1334.2                  | 6136.8                  | 137759.2          | 90258.1             | 833.5                | 58493.6              | 132994.2             | 232488.1              | 2500.5                 | 834995.5               | 79411.7                     | 20612.1                         | 6887940.2              | 9833.4                     | 105653.0                    | 19639.7                         | 2829061.8              |
| 1873251.0    | 1662826.0   | 103345.0              | 31978774.2     | 655893.2      | 32669.0      | 1230.0                  | 5996.0                  | 119739.9          | 78656.5             | 750.0                | 51676.7              | 116389.2             | 207020.9              | 2250.0                 | 737955.8               | 70503.8                     | 17914.9                         | 6430042.8              | 8808.9                     | 95869.6                     | 16989.9                         | 2615168.9              |
| 2004600.5    | 1708959.5   | 132504.0              | 34332360.1     | 692941.2      | 37125.0      | 1547.2                  | 7076.4                  | 126134.1          | 82511.1             | 738.9                | 52241.1              | 122558.8             | 208294.3              | 2216.7                 | 810220.4               | 74878.3                     | 18856.2                         | 7130053.9              | 8996.2                     | 103297.3                    | 17943.6                         | 2995140.0              |
| 1940369.7    | 1613178.8   | 109360.5              | 31800215.3     | 672228.3      | 33878.5      | 1467.1                  | 6633.6                  | 136368.9          | 89241.8             | 794.5                | 57114.2              | 129324.5             | 218846.3              | 2383.5                 | 772523.4               | 72039.7                     | 20405.9                         | 6391879.0              | 9708.6                     | 89007.2                     | 19409.0                         | 2649978.7              |
| 1967480.8    | 1688155.8   | 112105.8              | 33043504.6     | 681740.7      | 34535.4      | 1361.8                  | 6564.8                  | 128068.3          | 84016.5             | 788.1                | 54217.6              | 123953.8             | 215204.5              | 2364.3                 | 778995.2               | 72780.2                     | 19146.1                         | 6701076.1              | 9196.6                     | 95451.8                     | 18189.1                         | 2750507.6              |
| 2186091.4    | 1863026.3   | 129351.5              | 37266643.6     | 759257.2      | 36194.8      | 1472.0                  | 6567.0                  | 157663.7          | 103217.1            | 948.0                | 65393.0              | 149924.0             | 249934.6              | 2844.0                 | 904550.9               | 84316.9                     | 23554.4                         | 7268024.7              | 11291.7                    | 107014.5                    | 22392.9                         | 3016579.8              |
| 2048567.1    | 1718991.2   | 115496.7              | 33931498.0     | 701943.8      | 34756.2      | 1350.4                  | 6312.5                  | 140263.9          | 91762.5             | 808.8                | 58348.4              | 134304.5             | 227135.5              | 2426.4                 | 840007.8               | 79482.0                     | 20900.8                         | 6906919.1              | 10019.1                    | 102094.7                    | 19889.6                         | 2813210.3              |
| 2062944.6    | 1776997.5   | 115636.8              | 34622331.5     | 700086.6      | 36248.8      | 1437.3                  | 6582.5                  | 144126.0          | 94380.3             | 872.7                | 59515.2              | 136062.2             | 232345.2              | 2618.1                 | 858780.4               | 83531.1                     | 21529.4                         | 7105620.0              | 10334.0                    | 107055.1                    | 20502.5                         | 2853531.4              |
| 2047702.0    | 1678520.6   | 117627.7              | 33221293.2     | 683091.8      | 36281.6      | 1338.7                  | 6440.3                  | 148833.8          | 97616.9             | 886.0                | 63649.3              | 143295.3             | 252765.5              | 2658.0                 | 886981.8               | 85263.1                     | 22229.2                         | 7205809.1              | 10648.4                    | 109704.9                    | 21141.1                         | 2917735.7              |
| 2265992.5    | 1859033.1   | 123030.9              | 36675842.7     | 765250.1      | 39068.0      | 1418.0                  | 6904.7                  | 159958.9          | 104809.9            | 926.3                | 68328.8              | 153408.9             | 269532.3              | 2778.9                 | 955333.6               | 93317.3                     | 23843.4                         | 7753645.4              | 11427.2                    | 120266.7                    | 22650.2                         | 3102195.4              |
| 2057898.6    | 1728817.5   | 125301.0              | 34049912.3     | 684951.5      | 36912.1      | 1266.6                  | 6311.9                  | 141409.0          | 92625.4             | 843.8                | 59237.7              | 136329.1             | 232756.3              | 2531.4                 | 887722.4               | 86327.0                     | 21072.1                         | 7488883.4              | 10145.4                    | 116834.6                    | 20021.7                         | 3033298.7              |
| 2007933.4    | 1625174.3   | 110178.3              | 32245616.7     | 671101.8      | 32852.6      | 1153.2                  | 5560.1                  | 143749.9          | 94202.2             | 851.6                | 60667.2              | 137780.3             | 236753.3              | 2554.8                 | 843404.7               | 82189.7                     | 21460.8                         | 6723541.8              | 10283.2                    | 105286.7                    | 20427.5                         | 2697673.7              |
| 2270797.7    | 1898469.3   | 130803.2              | 37360387.7     | 762883.0      | 40816.8      | 1492.8                  | 7190.5                  | 162844.5          | 106660.1            | 976.6                | 68035.3              | 155302.2             | 262260.3              | 2929.8                 | 984436.9               | 95578.4                     | 24298.4                         | 8119058.0              | 11674.4                    | 124952.5                    | 23096.6                         | 3279741.5              |
| 2070420.6    | 1774243.2   | 134123.2              | 35152583.2     | 690682.2      | 37546.8      | 1363.1                  | 6539.6                  | 124563.1          | 81888.4             | 786.1                | 53778.9              | 123767.8             | 225630.5              | 2358.3                 | 850455.8               | 81719.4                     | 18581.7                         | 7529793.0              | 8994.7                     | 116171.7                    | 17642.7                         | 3064653.7              |
| 2156722.8    | 1877882.0   | 127050.6              | 36568415.4     | 726840.3      | 41027.9      | 1716.1                  | 7903.2                  | 144526.0          | 94767.6             | 920.5                | 60068.9              | 138531.4             | 232041.0              | 2761.5                 | 889477.1               | 86382.3                     | 21571.8                         | 7755645.0              | 10442.7                    | 114357.6                    | 20454.9                         | 3167346.3              |
| 2180655.1    | 1868623.9   | 128432.5              | 36733906.5     | 741286.0      | 38375.8      | 1558.5                  | 7035.8                  | 145469.4          | 95496.8             | 935.3                | 60888.3              | 140303.0             | 238389.6              | 2805.9                 | 890974.9               | 85483.9                     | 21736.4                         | 7543184.6              | 10513.4                    | 112577.7                    | 20660.1                         | 3069089.5              |
| 1942970.9    | 1612754.4   | 121649.8              | 31914703.3     | 641490.5      | 35825.3      | 1357.6                  | 6551.8                  | 123503.6          | 80929.7             | 733.6                | 52298.0              | 120774.5             | 212378.8              | 2200.8                 | 796433.0               | 75813.0                     | 18430.9                         | 7014002.2              | 8841.0                     | 104350.2                    | 17507.4                         | 2875921.3              |
| 2069285.8    | 17          |                       |                |               |              |                         |                         |                   |                     |                      |                      |                      |                       |                        |                        |                             |                                 |                        |                            |                             |                                 |                        |

| 一価不飽和脂肪酸               |                      |                         |                      |                          |                         |                          |                         |                   |                           |                               |                       |                       |                         |                               |                                |                                 |                           |                             |                             |                                     |                                 |                                  |  |
|------------------------|----------------------|-------------------------|----------------------|--------------------------|-------------------------|--------------------------|-------------------------|-------------------|---------------------------|-------------------------------|-----------------------|-----------------------|-------------------------|-------------------------------|--------------------------------|---------------------------------|---------------------------|-----------------------------|-----------------------------|-------------------------------------|---------------------------------|----------------------------------|--|
| 20:0<br>アラキジン酸<br>(mg) | 22:0<br>ベヘン酸<br>(mg) | 24:0<br>リグドセリン酸<br>(mg) | 10:1<br>デセン酸<br>(mg) | 14:1<br>ミリストレイン酸<br>(mg) | 15:1<br>ペンタデセン酸<br>(mg) | 16:1<br>パルミトレイン酸<br>(mg) | 17:1<br>ヘプタデセン酸<br>(mg) | 18:1<br>計<br>(mg) | 18:1 n-9<br>オレイン酸<br>(mg) | 18:1 n-7<br>シス-パイクセン酸<br>(mg) | 20:1<br>イコセン酸<br>(mg) | 22:1<br>ドコセン酸<br>(mg) | 24:1<br>テトラコセン酸<br>(mg) | 16:2<br>ヘキサデカ<br>ジエン酸<br>(mg) | 16:3<br>ヘキサデカ<br>トリエン酸<br>(mg) | 16:4<br>ヘキサデカ<br>テトラエン酸<br>(mg) | 18:2 n-6<br>リノール酸<br>(mg) | 18:3 n-3<br>α-リノレン酸<br>(mg) | 18:3 n-6<br>γ-リノレン酸<br>(mg) | 18:4 n-3<br>オクタデカ<br>テトラエン酸<br>(mg) | 20:2 n-6<br>イコサ<br>ジエン酸<br>(mg) | 20:3 n-3<br>イコサ<br>トリエン酸<br>(mg) |  |
| 104547.5               | 49767.5              | 22924.8                 | 11535.0              | 100990.6                 | 26.8                    | 796620.0                 | 84335.2                 | 14666608.1        | 5942992.9                 | 363555.8                      | 310776.6              | 115140.8              | 22091.3                 | 3090.6                        | 2866.9                         | 3257.4                          | 6474936.0                 | 1044269.4                   | 1341.9                      | 30189.9                             | 47514.5                         | 528.9                            |  |
| 119331.7               | 57010.1              | 26361.2                 | 11011.0              | 85428.2                  | 53.8                    | 822773.5                 | 81206.2                 | 16220382.5        | 6835971.7                 | 439113.7                      | 412363.0              | 196364.0              | 25064.1                 | 4098.8                        | 3196.8                         | 4440.6                          | 7484373.7                 | 1226880.0                   | 1621.9                      | 42917.7                             | 57788.1                         | 992.9                            |  |
| 123016.4               | 58987.7              | 26383.3                 | 10211.7              | 87545.4                  | 62.8                    | 850011.0                 | 85624.0                 | 16400216.3        | 7137117.8                 | 452121.9                      | 458265.3              | 243876.8              | 30290.8                 | 6003.4                        | 4876.1                         | 6326.0                          | 7597231.2                 | 1233506.9                   | 2806.8                      | 59924.9                             | 58785.0                         | 1143.6                           |  |
| 96468.3                | 45072.0              | 20347.8                 | 12112.6              | 81827.7                  | 56.9                    | 713501.0                 | 72120.4                 | 13094136.3        | 5692976.8                 | 359583.0                      | 380462.3              | 215925.1              | 24758.6                 | 4575.1                        | 3592.6                         | 4777.3                          | 5909240.3                 | 930382.0                    | 2110.2                      | 53764.3                             | 47159.1                         | 1016.1                           |  |
| 96173.7                | 44628.5              | 20126.1                 | 11243.6              | 79701.9                  | 44.1                    | 706635.3                 | 72758.1                 | 13280830.6        | 5819692.6                 | 370054.3                      | 341203.7              | 166642.7              | 21768.2                 | 3577.1                        | 2993.9                         | 3649.6                          | 5841595.1                 | 952367.0                    | 1873.5                      | 40419.1                             | 48631.5                         | 814.6                            |  |
| 113464.8               | 55331.9              | 24848.4                 | 10888.3              | 81745.8                  | 58.5                    | 777133.5                 | 76957.2                 | 14620353.4        | 5978806.8                 | 385596.3                      | 415882.3              | 219538.1              | 28599.7                 | 5342.2                        | 4418.9                         | 5541.6                          | 7059179.2                 | 1170190.1                   | 2331.6                      | 55189.9                             | 51561.7                         | 1025.0                           |  |
| 107048.1               | 50953.2              | 23163.1                 | 12661.5              | 122883.8                 | 41.7                    | 864173.4                 | 96728.8                 | 15272880.9        | 5854268.9                 | 370882.7                      | 366177.0              | 167187.0              | 23934.1                 | 3671.6                        | 3100.7                         | 3751.2                          | 6618268.4                 | 1070968.1                   | 1707.0                      | 41085.4                             | 48706.4                         | 770.2                            |  |
| 102170.4               | 49632.9              | 22591.7                 | 9948.5               | 73125.0                  | 33.4                    | 666416.2                 | 68896.3                 | 13547693.3        | 5839149.1                 | 369781.3                      | 331437.8              | 146602.7              | 22452.4                 | 3259.1                        | 2643.5                         | 3186.5                          | 6371064.8                 | 1052572.9                   | 1610.5                      | 37278.8                             | 46194.2                         | 668.5                            |  |
| 100007.5               | 46741.3              | 21959.2                 | 11701.1              | 78449.5                  | 33.3                    | 656099.6                 | 69445.3                 | 13153032.3        | 5303821.2                 | 338485.7                      | 325711.4              | 148110.2              | 23315.9                 | 3237.0                        | 2684.2                         | 3129.6                          | 6142434.9                 | 1032898.6                   | 1416.4                      | 36267.8                             | 43785.5                         | 635.2                            |  |
| 99924.5                | 47826.7              | 21551.9                 | 10788.9              | 74050.8                  | 28.7                    | 673555.8                 | 68471.0                 | 13396164.1        | 5705463.2                 | 355043.2                      | 312283.1              | 130035.4              | 21566.7                 | 2961.0                        | 2528.8                         | 2819.6                          | 6191108.4                 | 1009244.5                   | 1492.3                      | 33798.2                             | 45918.6                         | 556.7                            |  |
| 91623.1                | 44253.1              | 20159.9                 | 10015.9              | 68522.9                  | 20.9                    | 593250.1                 | 62025.3                 | 11973531.3        | 5038932.7                 | 317388.7                      | 284301.6              | 118518.2              | 20078.2                 | 2835.6                        | 2285.1                         | 2551.6                          | 5653610.9                 | 924527.4                    | 1239.0                      | 28299.0                             | 40557.0                         | 459.1                            |  |
| 106127.2               | 50087.1              | 23198.7                 | 12630.7              | 100237.5                 | 24.5                    | 799123.6                 | 84179.5                 | 14806747.2        | 6018841.8                 | 375184.8                      | 324275.4              | 123944.0              | 22804.2                 | 2891.4                        | 2548.0                         | 2725.5                          | 6513672.5                 | 1045682.7                   | 1378.2                      | 31784.2                             | 49828.7                         | 491.7                            |  |
| 104694.9               | 49525.0              | 23029.4                 | 13953.7              | 102518.7                 | 36.1                    | 792302.6                 | 83918.8                 | 14400131.1        | 5828753.4                 | 360178.1                      | 351316.9              | 162480.9              | 26094.9                 | 4241.6                        | 3653.1                         | 4120.5                          | 6307818.4                 | 1025739.1                   | 1927.4                      | 42208.3                             | 47516.6                         | 672.5                            |  |
| 95288.8                | 43899.1              | 20394.7                 | 12632.7              | 100247.0                 | 22.7                    | 752760.0                 | 81823.4                 | 13514412.0        | 5469574.1                 | 342903.0                      | 297427.7              | 115746.6              | 20831.0                 | 2802.5                        | 2567.6                         | 2701.7                          | 5768140.7                 | 923229.4                    | 1295.9                      | 29892.6                             | 45825.6                         | 459.8                            |  |
| 107870.2               | 49407.2              | 23119.1                 | 13036.8              | 107189.4                 | 26.4                    | 843376.5                 | 90875.4                 | 15238001.9        | 6385135.2                 | 397260.8                      | 338015.9              | 131535.5              | 23911.3                 | 3202.4                        | 2815.4                         | 2893.8                          | 6486798.3                 | 1034581.4                   | 1458.9                      | 33751.2                             | 52367.2                         | 515.3                            |  |
| 114846.1               | 54758.6              | 24826.3                 | 10870.9              | 72576.9                  | 39.8                    | 757428.4                 | 74723.9                 | 15001312.9        | 6866222.3                 | 422549.1                      | 383693.6              | 188057.9              | 28434.9                 | 5064.2                        | 4166.1                         | 5188.1                          | 7085111.5                 | 1153575.2                   | 1917.4                      | 45307.5                             | 54335.2                         | 790.5                            |  |
| 95811.4                | 42237.1              | 19528.4                 | 12230.8              | 97627.4                  | 23.2                    | 808516.8                 | 89350.4                 | 13676044.4        | 5138306.2                 | 376287.3                      | 333687.0              | 124602.9              | 30310.0                 | 3521.2                        | 3142.4                         | 3327.0                          | 5630752.9                 | 877910.9                    | 1548.9                      | 42014.3                             | 49335.3                         | 468.7                            |  |
| 96555.3                | 44728.9              | 20615.4                 | 11735.2              | 100118.4                 | 22.1                    | 777946.0                 | 84365.4                 | 13765601.6        | 5919207.4                 | 348261.8                      | 294837.1              | 110264.3              | 23463.7                 | 3100.1                        | 2914.0                         | 3161.2                          | 5881147.5                 | 921813.9                    | 1392.7                      | 32497.4                             | 45356.1                         | 462.0                            |  |
| 92448.0                | 43556.4              | 20676.5                 | 10209.1              | 97137.7                  | 13.4                    | 722769.2                 | 79595.8                 | 13337086.4        | 5651396.1                 | 334166.7                      | 259168.6              | 78906.4               | 19232.6                 | 2123.0                        | 2104.0                         | 2115.2                          | 5750958.3                 | 922123.6                    | 1118.3                      | 24162.6                             | 41358.6                         | 337.6                            |  |
| 110177.6               | 52664.5              | 24015.6                 | 10694.2              | 90530.4                  | 24.9                    | 766317.9                 | 82030.6                 | 14935390.4        | 6019819.2                 | 388653.9                      | 347959.6              | 140450.9              | 24841.4                 | 3337.8                        | 2805.8                         | 2970.7                          | 6809242.4                 | 1115480.7                   | 1640.8                      | 36647.6                             | 51662.6                         | 535.9                            |  |
| 103478.1               | 50821.1              | 23058.3                 | 11564.3              | 73361.9                  | 30.0                    | 649782.8                 | 66871.4                 | 13489613.4        | 5987680.0                 | 351600.5                      | 325938.0              | 141821.8              | 23545.8                 | 3300.9                        | 2740.3                         | 3175.2                          | 6367603.3                 | 1067480.2                   | 1559.1                      | 36111.8                             | 44496.0                         | 804.9                            |  |
| 101152.7               | 48594.8              | 22706.8                 | 10899.5              | 88426.0                  | 33.1                    | 720759.4                 | 75822.2                 | 13884545.7        | 5880939.1                 | 358846.1                      | 314160.5              | 131169.9              | 24901.7                 | 2479.5                        | 2908.8                         | 3313654.2                       | 101587.5                  | 1367.3                      | 32848.6                     | 45486.8                             | 599.4                           |                                  |  |
| 104533.8               | 48272.7              | 22638.9                 | 13345.2              | 93144.1                  | 24.9                    | 766151.0                 | 81103.2                 | 14217308.7        | 6155139.4                 | 389679.8                      | 335865.9              | 141800.5              | 24265.0                 | 3633.9                        | 3032.9                         | 3152.8                          | 6298129.8                 | 1011540.0                   | 1775.1                      | 37943.6                             | 50855.4                         | 496.5                            |  |
| 98590.1                | 46338.7              | 21694.8                 | 11892.3              | 100455.8                 | 38.7                    | 769330.6                 | 82005.7                 | 13886153.0        | 5793002.3                 | 353204.9                      | 328083.9              | 148151.0              | 22425.9                 | 3324.8                        | 2884.4                         | 3332.1                          | 6061246.4                 | 958915.6                    | 1446.0                      | 35909.4                             | 45388.0                         | 654.1                            |  |
| 102160.0               | 48961.9              | 23155.4                 | 12231.8              | 113370.5                 | 34.6                    | 825964.3                 | 88695.2                 | 14651795.1        | 5803507.0                 | 347408.4                      | 333282.6              | 148089.5              | 24164.0                 | 3541.2                        | 2978.6                         | 3492.6                          | 6317427.5                 | 1017594.0                   | 1512.5                      | 36103.0                             | 44464.5                         | 806.0                            |  |
| 101508.9               | 47925.7              | 22681.9                 | 12641.8              | 120767.4                 | 22.2                    | 842471.4                 | 92336.9                 | 14744137.0        | 5700281.4                 | 337115.6                      | 300760.6              | 108678.8              | 21985.5                 | 2855.7                        | 2748.6                         | 2954.4                          | 6194242.1                 | 984544.4                    | 1169.1                      | 27693.5                             | 44392.3                         | 452.3                            |  |
| 107841.4               | 51372.7              | 24252.8                 | 13547.2              | 143544.9                 | 20.4                    | 930423.2                 | 105136.6                | 15977246.9        | 5966141.7                 | 349234.2                      | 309388.1              | 102957.5              | 22344.9                 | 2888.1                        | 2826.3                         | 2872.6                          | 6643793.9                 | 1064544.1                   | 1228.5                      | 27169.0                             | 45091.3                         | 448.0                            |  |
| 98016.5                | 45060.9              | 21217.6                 | 12001.8              | 135854.7                 | 18.9                    | 926567.6                 | 102302.6                | 15148194.3        | 5857852.7                 | 352624.6                      | 294815.6              | 97662.6               | 20136.4                 | 2731.5                        | 2639.6                         | 2626.4                          | 6050866.7                 | 930405.3                    | 1158.6                      | 25413.2                             | 46971.4                         | 399.0                            |  |
| 88613.9                | 40490.6              | 19367.5                 | 12226.9              | 119445.8                 | 15.1                    | 801925.1                 | 89212.6                 | 13324655.9        | 5330937.7                 | 312543.4                      | 259495.8              | 85543.9               | 19043.5                 | 2757.7                        | 2768.8                         | 2689.2                          | 5330976.5                 | 825390.8                    | 1267.1                      | 25865.4                             | 40621.8                         | 341.8                            |  |
| 112636.5               | 53079.2              | 25279.9                 | 13790.3              | 144418.6                 | 25.6                    | 971354.4                 | 107950.5                | 16683487.9        | 6361396.0                 | 382197.6                      | 335048.8              | 118854.7              | 23179.6                 | 3360.9                        | 3230.0                         | 3347.2                          | 6910047.9                 | 1118666.3                   | 1412.1                      | 30413.6                             | 49353.4                         | 491.1                            |  |
| 101480.4               | 46784.5              | 21980.6                 | 10608.7              | 124682.5                 | 17.1                    | 932637.2                 | 99930.2                 | 15465371.3        | 6241188.7                 | 375344.8                      | 307598.4              | 101947.2              | 22800.3                 | 3225.1                        | 2993.6                         | 2959.6                          | 6264371.2                 | 969914.3                    | 1457.9                      | 29720.2                             | 49706.7                         | 383.6                            |  |
| 121849.9               | 60427.0              | 27341.8                 | 12280.0              | 111844.2                 | 22.9                    | 882962.2                 | 92479.8                 | 16720869.9        | 6516774.1                 | 393875.8                      | 345032.6              | 118125.8              | 27117.6                 | 4140.4                        | 3977.6                         | 4317.4                          | 7601105.1                 | 1262446.1                   | 1752.4                      | 34787.5                             | 49641.7                         | 506.6                            |  |
| 110856.5               | 52726.8              | 24490.9                 | 12402.7              | 104650.0                 | 25.1                    | 861117.5                 | 88684.1                 | 15472925.6        | 6396159.8                 | 381888.6                      | 328469.1              | 120445.6              | 26994.8                 | 4444.3                        | 4230.6                         | 4375.7                          | 6747416.1                 | 1088541.1                   | 1963.4                      | 38113.5                             | 49638.4                         | 528.5                            |  |
| 101061.4               | 47806.9              | 21628.3                 | 10522.0              | 104264.6                 | 22.4                    | 829939.4                 | 86773.5                 | 14658290.6        | 5847450.0                 | 355106.1                      | 302093.4              | 104891.5              | 22352.3                 | 2842.4                        | 2563.1                         | 2828.4                          | 6294179.5                 | 999849.6                    | 1136.8                      | 27935.6                             | 46910.6                         | 444.9                            |  |
| 112285.3               | 55038.5              | 25100.8                 | 12437.0              | 131067.0                 | 30.8                    | 916554.2                 | 100223.5                | 16006624.6        | 5628947.4                 | 342824.0                      | 336766.1              | 128238.7              | 24740.0                 | 3798.4                        | 3480.2                         | 3842.5                          | 7014645.9                 | 1142011.7                   | 1536.5                      | 33912.9                             | 46505.6                         | 566.1                            |  |
| 105750.7               | 50853.2              | 23170.8                 | 10610.7              | 118051.8                 | 23.7                    | 892926.6                 | 95009.6                 | 15379719.5        | 5832476.5                 | 344749.6                      | 315012.9              | 112234.0              | 24881.7                 | 3715.2                        | 3368.9                         | 3721.8                          | 6609033.1                 | 1050414.6                   | 1443.7                      | 31170.8                             | 46347.1                         | 491.5                            |  |
| 90053.4                | 41999.1              | 19522.2                 | 10707.5              | 111682.3                 | 21.8                    | 779086.7                 | 86695.3                 | 13157637.0        | 4986625.3                 | 302804.1                      | 277244.9              | 103485.9              | 20423.3                 | 2509.8                        | 2415.0                         | 2429.5                          | 5530407.6                 | 874806.9                    | 1236.5                      | 30175.5                             | 40437.4                         | 411.8                            |  |
| 95857.3                | 46046.3              | 21349.8                 | 12101.9              | 109140.6                 | 22.9                    | 783520.2                 | 84025.6                 | 13716676.2        | 5192594.5                 | 312282.2                      | 284583.6              | 104537.8              | 21747.3                 | 3106.4                        | 2898.8                         | 2965.3                          | 5969647.4                 | 949138.8                    | 1332.1                      | 30382.9                             | 40687.9                         | 450.2                            |  |
| 106654.4               | 52900.6              | 24398.3                 | 11055.5              | 116334.6                 | 33.9                    | 839413.1                 | 89555.7                 | 15142135.8        | 5519336.0                 | 330098.9                      | 318321.7              | 126463.7              | 22587.1                 | 3294.0                        | 2977.1                         | 3318.8                          | 6792006.6                 | 1089175.5                   | 1369.8                      | 31307.6                             | 43263.6                         | 591.4                            |  |
| 100640.5               | 49108.4              | 22546.9                 | 8435.0               | 95555.6                  | 20.9                    | 790631.5                 | 80980.0                 | 14222645.0        | 5538911.3                 | 328104.7                      | 301083.0              | 112742.9              | 24563.3                 | 3225.9                        | 2994.9                         | 2947.6                          | 6313588.6                 | 1028312.6                   | 1527.7                      | 32540.3                             | 42008.3                         | 411.1                            |  |
| 104249.2               | 47311.7              | 22199.7                 | 11669.0              | 126184.5                 | 17.9                    | 958473.6                 | 101532.2                | 15824013.3        | 6206601.9                 | 380417.3                      | 305545.4              | 91266.0               | 21996.9                 | 2972.1                        | 2757.8                         | 2970.5                          | 6396152.9                 | 1003794.9                   | 1316.3                      |                                     |                                 |                                  |  |

| 多価不飽和脂肪酸                         |                                   |                            |                                    |                                 |                             |                                   |                                   |                                   |                                   | 未同定物質<br>(mg) | 利用可能炭水化物   |             |           |               |            |            |           |               |               |               | 糖アルコール        |  |
|----------------------------------|-----------------------------------|----------------------------|------------------------------------|---------------------------------|-----------------------------|-----------------------------------|-----------------------------------|-----------------------------------|-----------------------------------|---------------|------------|-------------|-----------|---------------|------------|------------|-----------|---------------|---------------|---------------|---------------|--|
| 20:3 n-6<br>イコサ<br>トリエン酸<br>(mg) | 20:4 n-3<br>イコサ<br>テトラエン酸<br>(mg) | 20:4 n-6<br>アラキドン酸<br>(mg) | 20:5 n-3<br>エイコサ<br>ペンタエン酸<br>(mg) | 21:5 n-3<br>ヘンイコサ<br>ペンタエン酸(mg) | 22:2<br>ドコサ<br>ジエン酸<br>(mg) | 22:4 n-6<br>ドコサ<br>テトラエン酸<br>(mg) | 22:5 n-3<br>ドコサ<br>ペンタエン酸<br>(mg) | 22:5 n-6<br>ドコサ<br>ペンタエン酸<br>(mg) | 22:6 n-3<br>ドコサ<br>ヘキサエン酸<br>(mg) |               | でん粉<br>(g) | ぶどう糖<br>(g) | 果糖<br>(g) | ガラクトース<br>(g) | しよ糖<br>(g) | 麦芽糖<br>(g) | 乳糖<br>(g) | トレハロース<br>(g) | 利用可能<br>炭水化物計 | ソルビトール<br>(g) | マンニトール<br>(g) |  |
| 22273.1                          | 11148.1                           | 101579.3                   | 97110.4                            | 2934.2                          | 199.6                       | 13341.9                           | 35756.1                           | 16253.0                           | 181629.3                          | 186755.0      | 85688.2    | 4553.3      | 4799.6    | 38.5          | 12174.9    | 719.6      | 3759.4    | 59.9          | 111807.5      | 158.4         | 225.6         |  |
| 23719.0                          | 14666.0                           | 109733.0                   | 115193.5                           | 4476.5                          | 353.2                       | 16276.8                           | 40169.5                           | 18179.9                           | 214081.8                          | 237868.6      | 90994.7    | 4521.0      | 4563.7    | 40.5          | 11953.4    | 660.2      | 3436.5    | 57.5          | 116253.7      | 112.6         | 244.4         |  |
| 24418.8                          | 19855.7                           | 121708.6                   | 166031.1                           | 6191.1                          | 463.5                       | 17052.0                           | 53616.9                           | 21126.2                           | 296799.1                          | 270504.2      | 95711.6    | 5295.0      | 6483.4    | 41.9          | 13893.5    | 733.9      | 3267.8    | 66.6          | 125534.7      | 243.4         | 318.0         |  |
| 21387.8                          | 17434.1                           | 103018.9                   | 136212.8                           | 4902.2                          | 399.2                       | 13626.8                           | 45323.9                           | 17529.7                           | 253317.1                          | 229853.3      | 88194.7    | 4814.3      | 5735.2    | 35.9          | 10886.5    | 746.9      | 4094.3    | 69.1          | 114597.3      | 233.8         | 266.2         |  |
| 21192.6                          | 13246.3                           | 104761.0                   | 111913.0                           | 4027.5                          | 264.1                       | 14256.9                           | 37944.0                           | 17775.8                           | 206924.5                          | 213674.1      | 77361.4    | 4795.8      | 5060.8    | 32.6          | 11500.5    | 687.0      | 3472.7    | 55.0          | 102993.1      | 202.0         | 297.2         |  |
| 22215.2                          | 17884.1                           | 106477.5                   | 151180.9                           | 5502.7                          | 387.5                       | 14540.2                           | 49014.1                           | 17415.2                           | 267285.3                          | 223996.1      | 87471.9    | 5038.8      | 5564.2    | 38.8          | 13914.1    | 662.2      | 3695.7    | 59.1          | 116476.3      | 235.7         | 263.2         |  |
| 23529.1                          | 14087.9                           | 105707.5                   | 115455.2                           | 3975.3                          | 270.9                       | 13911.6                           | 39854.5                           | 17841.3                           | 216675.8                          | 213867.7      | 93172.8    | 4717.7      | 5473.9    | 52.8          | 13429.9    | 721.8      | 4137.0    | 57.7          | 121785.4      | 312.7         | 315.9         |  |
| 19943.9                          | 12552.3                           | 98608.6                    | 103274.2                           | 3613.9                          | 254.3                       | 13621.0                           | 36403.2                           | 17039.5                           | 198170.8                          | 203522.1      | 86211.2    | 4472.6      | 4921.9    | 35.9          | 10921.8    | 625.7      | 3178.4    | 43.8          | 110417.9      | 258.6         | 271.9         |  |
| 19472.6                          | 13036.0                           | 90943.8                    | 106109.6                           | 3541.4                          | 291.1                       | 12505.7                           | 38029.2                           | 15136.3                           | 205495.3                          | 67982.9       | 4557.3     | 4882.0      | 37.6      | 12427.5       | 646.7      | 3831.2     | 48.2      | 94426.2       | 193.4         | 185.6         |               |  |
| 20154.6                          | 11368.3                           | 98519.3                    | 98022.9                            | 3283.9                          | 204.4                       | 13320.4                           | 34724.7                           | 16612.2                           | 185345.7                          | 195919.8      | 75180.2    | 4387.3      | 4404.2    | 39.5          | 10770.8    | 712.2      | 3690.2    | 53.4          | 99240.9       | 156.4         | 222.6         |  |
| 17566.3                          | 11106.1                           | 82236.0                    | 90862.6                            | 3191.0                          | 199.1                       | 11643.1                           | 33199.9                           | 14049.7                           | 181498.5                          | 180300.7      | 83420.4    | 4281.6      | 4667.0    | 36.0          | 10323.0    | 696.1      | 3197.3    | 49.8          | 10676.5       | 187.9         | 201.7         |  |
| 22638.2                          | 11561.5                           | 100047.8                   | 97840.9                            | 3181.3                          | 196.5                       | 13846.0                           | 36640.7                           | 15601.1                           | 190727.7                          | 194337.0      | 84953.5    | 4532.3      | 4639.2    | 42.1          | 9872.3     | 774.6      | 4004.0    | 58.6          | 10889.3       | 144.5         | 235.2         |  |
| 23021.2                          | 14951.8                           | 106931.5                   | 132230.2                           | 4486.1                          | 244.3                       | 13696.3                           | 44997.4                           | 17986.1                           | 247812.9                          | 214986.5      | 80135.8    | 5171.6      | 5368.3    | 43.0          | 13513.4    | 701.9      | 4642.5    | 63.0          | 109657.6      | 164.5         | 281.7         |  |
| 21269.1                          | 11187.4                           | 93159.9                    | 95397.5                            | 3041.8                          | 195.5                       | 12739.2                           | 35451.4                           | 14562.0                           | 184745.9                          | 185454.2      | 74110.4    | 4484.4      | 4677.2    | 34.3          | 10054.6    | 668.0      | 3871.9    | 56.9          | 97970.3       | 141.8         | 211.1         |  |
| 23491.6                          | 12376.8                           | 103435.3                   | 106980.4                           | 3548.8                          | 192.2                       | 14637.4                           | 40267.0                           | 16197.4                           | 210867.0                          | 203511.8      | 98392.0    | 4767.6      | 4938.3    | 37.0          | 10809.4    | 758.0      | 4002.5    | 63.8          | 111778.7      | 136.6         | 243.9         |  |
| 22601.3                          | 17943.4                           | 11127.1                    | 151059.0                           | 5091.1                          | 385.7                       | 15892.4                           | 51598.4                           | 19125.5                           | 278184.6                          | 237590.6      | 95736.4    | 5422.5      | 5878.4    | 41.6          | 13857.8    | 667.2      | 3766.8    | 52.7          | 125465.9      | 304.5         | 262.1         |  |
| 22935.7                          | 17498.3                           | 112897.3                   | 159925.1                           | 3665.0                          | 241.0                       | 14119.0                           | 57380.8                           | 17785.8                           | 30231.6                           | 219775.0      | 83460.5    | 4635.6      | 5000.7    | 38.3          | 10578.3    | 789.6      | 4045.3    | 62.7          | 108623.8      | 195.7         | 301.6         |  |
| 21931.2                          | 12274.5                           | 104827.7                   | 114003.7                           | 3055.7                          | 160.4                       | 13247.7                           | 41295.6                           | 16912.6                           | 207604.5                          | 194385.3      | 84085.9    | 4527.1      | 4687.2    | 35.6          | 9702.8     | 786.2      | 3819.8    | 60.2          | 107707.5      | 162.8         | 245.7         |  |
| 20695.1                          | 9071.4                            | 102138.1                   | 82776.8                            | 2156.6                          | 142.9                       | 12563.6                           | 31474.2                           | 17515.8                           | 157945.6                          | 160572.4      | 95706.3    | 3897.8      | 3928.5    | 36.0          | 10027.4    | 629.5      | 3602.5    | 50.3          | 117886.7      | 112.5         | 224.7         |  |
| 22196.6                          | 13093.3                           | 100836.3                   | 112374.4                           | 3796.5                          | 244.9                       | 14558.9                           | 40929.9                           | 16150.4                           | 221306.1                          | 199020.0      | 87528.6    | 4637.8      | 4721.1    | 38.1          | 10228.4    | 671.7      | 3440.8    | 58.5          | 111326.2      | 137.5         | 228.1         |  |
| 19654.8                          | 12793.9                           | 95995.9                    | 105943.6                           | 3541.7                          | 236.7                       | 12835.8                           | 37395.7                           | 16194.4                           | 201399.1                          | 202936.4      | 77016.2    | 4995.9      | 5954.2    | 37.2          | 13337.8    | 706.5      | 3771.0    | 51.3          | 105897.8      | 259.1         | 226.2         |  |
| 21063.6                          | 11036.7                           | 99444.6                    | 91814.9                            | 3130.5                          | 186.7                       | 13280.5                           | 33822.3                           | 16869.3                           | 176805.1                          | 196113.9      | 95633.3    | 4174.0      | 4223.4    | 35.1          | 11594.0    | 679.6      | 3680.2    | 64.6          | 120095.2      | 118.6         | 193.4         |  |
| 22772.5                          | 13694.0                           | 104505.5                   | 120484.0                           | 4116.2                          | 219.3                       | 14650.7                           | 42890.6                           | 17431.2                           | 238977.7                          | 209870.1      | 100895.5   | 4911.5      | 5159.8    | 34.0          | 13526.3    | 673.0      | 4393.3    | 61.7          | 129467.4      | 156.6         | 274.2         |  |
| 21828.2                          | 12256.5                           | 99555.1                    | 103583.0                           | 3604.9                          | 194.7                       | 13196.0                           | 36955.2                           | 16881.5                           | 197182.0                          | 204050.4      | 91683.3    | 4674.6      | 4883.0    | 29.7          | 12878.2    | 756.1      | 3186.5    | 65.9          | 118665.5      | 125.7         | 190.3         |  |
| 23172.9                          | 13136.8                           | 108272.6                   | 110447.1                           | 3740.7                          | 200.0                       | 13391.7                           | 39490.6                           | 19527.5                           | 214485.3                          | 215738.1      | 93041.0    | 4427.4      | 4549.2    | 45.7          | 12258.4    | 726.8      | 3911.7    | 61.4          | 119028.8      | 166.4         | 183.4         |  |
| 22677.5                          | 11135.9                           | 98162.0                    | 94785.8                            | 2849.0                          | 174.0                       | 12548.2                           | 35909.1                           | 15640.7                           | 180098.2                          | 187428.6      | 85638.7    | 4251.7      | 4369.4    | 38.6          | 11956.3    | 787.3      | 4103.9    | 65.4          | 111227.9      | 144.8         | 200.3         |  |
| 24404.6                          | 10758.9                           | 105400.8                   | 98082.3                            | 2915.6                          | 171.9                       | 12994.3                           | 35621.1                           | 17198.7                           | 179732.5                          | 196057.1      | 98658.8    | 5057.7      | 5032.3    | 39.0          | 11989.6    | 930.3      | 4355.8    | 68.8          | 126141.2      | 116.6         | 268.2         |  |
| 24414.6                          | 10152.6                           | 106223.0                   | 89448.2                            | 2754.0                          | 140.1                       | 13534.7                           | 34122.1                           | 17487.7                           | 172758.6                          | 187672.3      | 84260.4    | 4459.6      | 4495.7    | 33.5          | 10674.8    | 793.7      | 3877.0    | 64.9          | 108671.2      | 110.9         | 220.2         |  |
| 21457.2                          | 9816.6                            | 93602.9                    | 89779.4                            | 2707.8                          | 117.0                       | 11567.9                           | 33334.0                           | 14840.1                           | 165342.7                          | 174279.5      | 82173.3    | 4490.5      | 4733.1    | 36.3          | 13426.8    | 841.2      | 3888.0    | 64.6          | 109671.6      | 147.0         | 193.7         |  |
| 25889.0                          | 11748.6                           | 112289.1                   | 100011.0                           | 3314.1                          | 177.2                       | 14325.7                           | 37748.3                           | 18737.0                           | 189948.0                          | 205428.6      | 102230.3   | 5013.9      | 5226.3    | 33.7          | 12994.0    | 828.6      | 4493.9    | 67.2          | 130898.0      | 153.1         | 245.7         |  |
| 24868.2                          | 11431.8                           | 113248.2                   | 105665.2                           | 3163.7                          | 150.6                       | 14392.1                           | 39258.0                           | 18623.1                           | 202425.8                          | 187619.5      | 83440.5    | 4622.0      | 4717.3    | 34.3          | 14391.4    | 774.6      | 3596.0    | 63.2          | 111649.5      | 140.0         | 238.3         |  |
| 25147.5                          | 13168.2                           | 124455.0                   | 129755.0                           | 4033.8                          | 209.4                       | 15301.7                           | 44529.1                           | 21421.8                           | 225429.1                          | 216672.8      | 79959.9    | 4868.7      | 5490.6    | 37.2          | 13850.7    | 769.4      | 4288.2    | 58.4          | 109338.4      | 305.1         | 223.1         |  |
| 24528.6                          | 13602.0                           | 119933.8                   | 132847.1                           | 3970.0                          | 224.8                       | 14626.0                           | 47123.2                           | 19503.3                           | 232824.9                          | 203998.5      | 86586.3    | 4786.8      | 4877.3    | 59.3          | 13264.1    | 772.2      | 4220.8    | 61.8          | 114651.6      | 195.5         | 256.2         |  |
| 22514.2                          | 10933.0                           | 102970.7                   | 96334.4                            | 2798.2                          | 157.5                       | 13294.5                           | 36513.8                           | 16472.5                           | 181674.1                          | 186049.8      | 70754.3    | 4301.1      | 4321.4    | 36.0          | 11548.6    | 775.6      | 3447.2    | 62.2          | 95252.8       | 127.4         | 193.5         |  |
| 24073.1                          | 12545.1                           | 105365.3                   | 112543.5                           | 3696.4                          | 177.4                       | 13135.7                           | 39824.8                           | 16979.3                           | 199739.0                          | 188671.8      | 84705.0    | 4703.2      | 4869.2    | 34.4          | 11613.2    | 748.2      | 4176.0    | 56.4          | 110917.7      | 141.3         | 259.9         |  |
| 23570.1                          | 12336.5                           | 109473.3                   | 113616.9                           | 3368.8                          | 157.5                       | 13236.0                           | 41759.1                           | 17909.7                           | 207924.6                          | 187307.6      | 76592.4    | 4195.4      | 4470.8    | 46.1          | 12572.6    | 663.1      | 3806.4    | 51.3          | 102411.8      | 161.4         | 239.4         |  |
| 20424.6                          | 10525.7                           | 90038.5                    | 91740.6                            | 2580.4                          | 152.3                       | 11205.6                           | 33955.6                           | 14112.6                           | 175117.6                          | 174050.3      | 86020.1    | 4583.0      | 4782.6    | 39.3          | 11153.9    | 709.4      | 3683.4    | 59.1          | 111051.1      | 136.4         | 203.0         |  |
| 21766.5                          | 11208.2                           | 101835.2                   | 101812.2                           | 3132.6                          | 146.4                       | 12016.5                           | 36454.9                           | 17027.1                           | 184717.7                          | 183695.4      | 85457.7    | 4618.3      | 4964.3    | 41.6          | 12101.3    | 916.6      | 4087.2    | 57.8          | 112275.7      | 155.3         | 234.6         |  |
| 22951.7                          | 10916.1                           | 106622.8                   | 93112.4                            | 3122.2                          | 165.7                       | 12912.7                           | 34314.3                           | 18551.4                           | 174355.3                          | 185146.0      | 88725.4    | 4308.2      | 4537.5    | 33.3          | 13137.9    | 758.1      | 3877.5    | 57.4          | 115443.0      | 135.9         | 224.0         |  |
| 21410.1                          | 11624.2                           | 106969.5                   | 109286.0                           | 3232.0                          | 159.0                       | 12690.6                           | 38397.2                           | 18759.1                           | 215438.1                          | 188845.1      | 77310.3    | 4361.9      | 4565.7    | 39.1          | 12020.1    | 664.2      | 2867.9    | 46.1          | 101886.4      | 170.8         | 241.7         |  |
| 24806.8                          | 10173.2                           | 106586.7                   | 97320.0                            | 2726.8                          | 120.1                       | 13917.6                           | 36319.6                           | 15450.6                           | 175267.1                          | 175617.2      | 83961.0    | 4173.1      | 4187.8    | 31.9          | 9365.4     | 652.0      | 3610.7    | 58.0          | 106050.3      | 103.7         | 197.1         |  |
| 23255.3                          | 12691.7                           | 106977.7                   | 121543.0                           | 3667.4                          | 171.5                       | 13267.1                           | 43778.1                           | 16797.8                           | 215502.0                          | 183949.6      | 108651.6   | 4593.4      | 4821.4    | 47.4          | 13895.3    | 701.6      | 3630.3    | 62.2          | 136422.0      | 191.5         | 215.7         |  |
| 22075.6                          | 10251.3                           | 105703.9                   | 98923.4                            | 2843.2                          | 127.9                       | 12941.0                           | 36585.4                           | 16696.8                           | 180674.9                          | 171091.9      | 90756.7    | 4315.7      | 4310.2    | 38.3          | 11563.8    | 608.6      | 3251.5    | 60.9          | 114923.1      | 113.9         | 235.9         |  |
| 22615.5                          | 8817.0                            | 102872.3                   | 81850.0                            | 2455.5                          | 94.9                        | 12961.4                           | 31767.3                           | 16532.5                           | 154988.9                          | 170488.9      | 85896.8    | 4111.9      | 4358.6    | 41.8          | 12110.7    | 605.6      | 3223.7    | 55.7          | 110425.8      | 145.9         | 183.4         |  |
| 24099.4                          | 11840.2                           | 110547.5                   | 112884.1                           | 3352.9                          | 126.9                       | 13066.9                           | 40555.2                           | 17772.1                           | 202927.1                          | 179002.5      | 82974.9    | 4411.2      | 4596.7    | 46.4          | 13518.6    | 615.2      | 3736.7    | 81.8          | 109996.2      | 149.8         | 216.8         |  |
| 21059.1                          | 8625.8                            | 93691.6                    | 81990.8                            | 2470.9                          | 92.4                        | 11961.9                           | 31434.7                           | 14850.4                           | 157743.8                          | 151290.5      | 67806.1    | 4067.3      | 4391.6    | 42.4          | 12779.7    | 547.2      | 3651.7    | 59.8          | 93369.0       | 155.3         | 169.3         |  |
| 21794.7                          | 9087.8                            | 104099.6                   | 86                                 |                                 |                             |                                   |                                   |                                   |                                   |               |            |             |           |               |            |            |           |               |               |               |               |  |

## Summary

|            |                    |            |    |     |
|------------|--------------------|------------|----|-----|
| Data:      | X                  | dimension: | 53 | 109 |
|            | Y                  | dimension: | 53 | 1   |
| Fit        | method:            | kernelpls  |    |     |
| Number of  | components         | considered |    | 52  |
| TRAINING % | variance explained |            |    |     |

|        | 1comps  | 2comps  | 3comps  | 4comps  | 5comps  | 6comps  | 7comps  | 8comps  | 9comps  | 10comps | 11comps | 12comps | 13comps | 14comps | 15comps |
|--------|---------|---------|---------|---------|---------|---------|---------|---------|---------|---------|---------|---------|---------|---------|---------|
| X      | 14.20   | 25.33   | 29.6    | 33.48   | 38.04   | 45.41   | 49.75   | 53.38   | 56.9    | 59.56   | 61.55   | 63.32   | 65.56   | 67.16   | 68.45   |
| sio251 | 73.42   | 86.45   | 95.05   | 97.53   | 98.71   | 99.05   | 99.41   | 99.67   | 99.81   | 99.89   | 99.93   | 99.95   | 99.96   | 99.97   | 99.97   |
|        | 16comps | 17comps | 18comps | 19comps | 20comps | 21comps | 22comps | 23comps | 24comps | 25comps | 26comps | 27comps | 28comps | 29comps |         |
| X      | 69.59   | 70.9    | 72.41   | 73.82   | 75.28   | 76.79   | 78.38   | 79.39   | 80.88   | 81.95   | 83.47   | 84.32   | 85.23   | 86      |         |
| sio251 | 99.98   | 99.98   | 99.98   | 99.99   | 99.99   | 99.99   | 100     | 100     | 100     | 100     | 100     | 100     | 100     | 100     |         |
|        | 30comps | 31comps | 32comps | 33comps | 34comps | 35comps | 36comps | 37comps | 38comps | 39comps | 40comps | 41comps | 42comps | 43comps |         |
| X      | 86.86   | 87.87   | 88.71   | 89.73   | 90.47   | 91.07   | 92.06   | 92.71   | 93.35   | 93.81   | 94.25   | 94.77   | 95.46   | 96.24   |         |
| sio251 | 100     | 100     | 100     | 100     | 100     | 100     | 100     | 100     | 100     | 100     | 100     | 100     | 100     | 100     |         |
|        | 44comps | 45comps | 46comps | 47comps | 48comps | 49comps | 50comps | 51comps | 52comps |         |         |         |         |         |         |
| X      | 96.72   | 97.27   | 97.71   | 98.18   | 98.62   | 98.96   | 99.24   | 99.65   | 100     |         |         |         |         |         |         |
| sio251 | 100     | 100     | 100     | 100     | 100     | 100     | 100     | 100     | 100     |         |         |         |         |         |         |

>

| Loadings |           | 和名      | 英名             | Factor1   | Factor2  | Factor3  | Factor4  | Factor5  | Factor6  | Factor7  | Factor8  | Factor9   | Factor10 | Factor11 | Factor12  | Factor13  | Factor14 | Factor15 | Factor16 | Factor17  | Factor18  | Factor19  | Factor20  | Factor21  | Factor22  | Factor23  | Factor24  | Factor25 | Factor26 | Factor27 | Factor28 | Factor29  | Factor30 | Factor31 | Factor32 | Factor33 | Factor34 | Factor35 |          |          |
|----------|-----------|---------|----------------|-----------|----------|----------|----------|----------|----------|----------|----------|-----------|----------|----------|-----------|-----------|----------|----------|----------|-----------|-----------|-----------|-----------|-----------|-----------|-----------|-----------|----------|----------|----------|----------|-----------|----------|----------|----------|----------|----------|----------|----------|----------|
| 1        | intake    | 米       | Rice           | 0.067597  | 0.021552 | 0.23239  | 0.218039 | 0.07041  | -0.07691 | -0.13952 | 0.055045 | 0.181688  | 0.122445 | -0.15054 | -0.0715   | -0.08635  | 0.137029 | 0.013735 | -0.14946 | -0.035754 | 0.131905  | -0.16134  | 0.209263  | -0.2623   | 0.251469  | -0.19022  | 0.203707  | -0.31393 | 0.066829 | 0.058785 | -0.07286 | 0.067474  | 0.04216  | 0.088383 | 0.234078 | -0.11813 | 0.040712 | -0.04312 | 0.039085 |          |
| 2        | intake12  | 食パン     | White bread    | -0.11322  | -0.02746 | 0.096424 | 0.004481 | -0.11223 | 0.206589 | -0.32811 | 0.015744 | 0.031649  | -0.03662 | -0.07237 | -0.07137  | -0.068585 | 0.007508 | -0.10218 | -0.06367 | -0.035754 | 0.021554  | 0.018949  | -0.209629 | 0.150549  | -0.040025 | -0.002812 | -0.11177  | 0.034575 | 0.096491 | -0.05055 | -0.04186 | 0.067845  | -0.06292 | 0.172996 | -0.02783 | -0.0119  | 0.025334 | -0.0174  | 0.017678 |          |
| 3        | intake14  | 生だんご・そば | "Udon"/"Soba"  | -0.03685  | 0.028873 | 0.091464 | -0.22435 | 0.01662  | 0.283272 | -0.1629  | 0.024394 | -0.10823  | 0.104782 | -0.17683 | -0.0752   | 0.165044  | 0.034399 | -0.09011 | -0.02605 | 0.005078  | -0.021381 | 0.13569   | 0.093729  | -0.06647  | -0.03273  | -0.0523   | -0.05637  | 0.103487 | -0.02875 | -0.02595 | -0.01475 | -0.1592   | 0.114669 | -0.01347 | 0.064445 | 0.052092 | -0.10635 | 0.064375 | 0.162344 |          |
| 4        | intake15  | スヌードアイ  | "Lidon"/"Soba" | 0.115276  | -0.02863 | 0.158729 | -0.23516 | 0.01574  | 0.068234 | 0.052961 | -0.01202 | -0.07368  | 0.104782 | 0.053239 | -0.19471  | 0.01130   | -0.06682 | -0.04346 | -0.19232 | -0.17631  | 0.121389  | 0.13569   | 0.093729  | -0.06647  | -0.03273  | -0.0523   | -0.05637  | 0.103487 | -0.02875 | -0.02595 | -0.01475 | -0.1592   | 0.114669 | -0.01347 | 0.064445 | 0.052092 | -0.10635 | 0.064375 | 0.162344 |          |
| 5        | intake16  | 中巻めし    | Spaghetti      | -0.008069 | -0.17044 | 0.090009 | 0.209131 | -0.05302 | -0.11008 | -0.00298 | 0.0867   | -0.09892  | -0.07194 | -0.02428 | -0.019589 | 0.18905   | -0.05494 | -0.02707 | -0.19616 | 0.022429  | -0.24161  | 0.121736  | -0.08401  | 0.239373  | -0.19752  | -0.08417  | -0.02692  | 0.173167 | -0.01544 | -0.04589 | -0.12886 | 0.108265  | -0.00398 | -0.18651 | 0.284888 | -0.1097  | 0.109228 | -0.19129 | -0.01605 |          |
| 6        | intake16  | 小麦粉     | Spaghetti      | 0.054523  | -0.14044 | 0.059702 | 0.004744 | 0.12276  | -0.06762 | -0.17617 | 0.188974 | -0.11085  | 0.209384 | -0.19721 | -0.06734  | 0.116967  | -0.1674  | -0.02184 | 0.139945 | -0.15572  | 0.066626  | 0.008903  | 0.022551  | -0.3507   | 0.078396  | 0.04414   | -0.02143  | -0.02783 | 0.138522 | 0.026376 | -0.13187 | 0.123712  | -0.01718 | -0.06359 | 0.052231 | -0.02231 | 0.096903 | 0.01365  | 0.06716  |          |
| 7        | intake17  | 小麦粉     | Spaghetti      | -0.044672 | 0.07592  | 0.17052  | -0.08905 | -0.10112 | 0.025757 | -0.03354 | 0.11466  | -0.060982 | -0.01615 | -0.12918 | -0.21593  | -0.04422  | -0.12756 | -0.24129 | 0.04083  | 0.184516  | -0.32903  | 0.204876  | -0.19945  | 0.188766  | -0.03257  | -0.08417  | 0.052323  | -0.27355 | -0.02458 | 0.062725 | -0.00782 | 0.005892  | -0.1618  | 0.023242 | -0.15906 | 0.300267 | -0.0765  | 0.190384 | -0.1093  |          |
| 8        | intake18  | もち      | "Mochi", rice  | 0.032802  | -0.15059 | 0.100379 | 0.042585 | -0.07383 | 0.056008 | -0.22984 | 0.096244 | 0.086206  | -0.22226 | 0.24782  | -0.02355  | 0.05993   | -0.02613 | 0.089173 | -0.15595 | 0.05211   | 0.169969  | -0.17938  | -0.06763  | -0.00196  | 0.190702  | -0.05778  | -0.01425  | -0.03694 | -0.01359 | 0.096584 | 0.114439 | -0.0365   | -0.14173 | 0.03152  | -0.00215 | 0.050234 | -0.12311 | 0.07471  |          |          |
| 9        | intake19  | まぐろ     | Tuna fish      | 0.041214  | -0.20543 | 0.131629 | -0.03512 | 0.147102 | -0.12101 | 0.07605  | -0.13463 | 0.164052  | -0.03367 | -0.15807 | 0.182701  | -0.16464  | -0.09595 | -0.02322 | 0.178084 | -0.07721  | 0.017188  | 0.0306    | -0.00715  | -0.05085  | -0.01272  | -0.08172  | -0.02713  | -0.03457 | -0.04319 | 0.182448 | -0.05896 | 0.003161  | 0.060678 | 0.112484 | -0.01572 | -0.0301  | 0.042259 | 0.093211 |          |          |
| 10       | intake110 | あじ      | Horse mackerel | -0.02493  | 0.105847 | -0.15704 | 0.292657 | -0.20879 | 0.119284 | 0.088498 | -0.09003 | 0.159636  | -0.08456 | -0.02376 | -0.03054  | 0.163823  | -0.15519 | 0.019846 | 0.080049 | -0.03199  | 0.0927121 | -0.10002  | -0.10874  | 0.140521  | -0.14697  | 0.11803   | -0.12663  | 0.157189 | -0.02841 | -0.02506 | 0.101832 | 0.059822  | -0.17924 | 0.079783 | 0.040155 | 0.059836 | 0.18401  | -0.07411 | 0.130605 |          |
| 11       | intake111 | いわし     | Sardines       | 0.068336  | 0.029129 | 0.22777  | 0.026936 | -0.26913 | 0.055119 | 0.10738  | 0.050521 | 0.070774  | -0.11651 | -0.04525 | -0.06526  | 0.015645  | -0.05519 | -0.10545 | 0.089036 | -0.03199  | 0.0927121 | -0.10002  | -0.10874  | 0.140521  | -0.14697  | 0.11803   | -0.12663  | 0.157189 | -0.02841 | -0.02506 | 0.101832 | 0.059822  | -0.17924 | 0.079783 | 0.040155 | 0.059836 | 0.18401  | -0.07411 | 0.130605 |          |
| 12       | intake112 | かつお     | Skipjack       | 0.054523  | -0.14044 | 0.059702 | 0.004744 | 0.12276  | -0.06762 | -0.17617 | 0.188974 | -0.11085  | 0.209384 | -0.19721 | -0.06734  | 0.116967  | -0.1674  | -0.02184 | 0.139945 | -0.15572  | 0.066626  | 0.008903  | 0.022551  | -0.3507   | 0.078396  | 0.04414   | -0.02143  | -0.02783 | 0.138522 | 0.026376 | -0.13187 | 0.123712  | -0.01718 | -0.06359 | 0.052231 | -0.02231 | 0.096903 | 0.01365  | 0.06716  |          |
| 13       | intake113 | かれい     | Flounder       | 0.15108   | 0.064422 | -0.17559 | 0.051971 | 0.010986 | 0.092874 | -0.19808 | 0.183326 | -0.09733  | -0.03591 | -0.07429 | -0.04524  | -0.11069  | -0.041   | 0.085511 | -0.0473  | -0.0341   | 0.063635  | -0.06088  | -0.07669  | 0.163006  | -0.07944  | -0.07749  | 0.191279  | 0.036418 | -0.02934 | -0.02434 | 0.062024 | -0.0094   | -0.0214  | 0.04246  | 0.024408 | -0.1645  | 0.064458 | -0.08597 | 0.070313 | -0.15839 |
| 14       | intake114 | さけ      | Salmon         | 0.196489  | -0.13232 | 0.02522  | -0.01691 | 0.10384  | -0.06267 | 0.084353 | -0.07449 | -0.05873  | 0.100964 | -0.17836 | -0.00689  | 0.077168  | -0.04452 | 0.106    | -0.15172 | -0.0314   | 0.017431  | -0.0144   | 0.05456   | 0.054451  | 0.082162  | -0.07815  | 0.075277  | -0.1186  | -0.02839 | 0.132509 | -0.00183 | -0.08695  | 0.04346  | -0.03049 | -0.07309 | 0.089666 | -0.02025 | -0.02672 | 0.028435 |          |
| 15       | intake115 | さば      | Mackerel       | 0.013637  | 0.142576 | -0.175   | 0.17859  | -0.03132 | 0.122005 | -0.05493 | -0.04745 | 0.040258  | 0.019727 | -0.15024 | 0.215624  | 0.022841  | -0.00824 | -0.27036 | 0.111118 | -0.14562  | -0.02301  | 0.047073  | -0.16484  | 0.146552  | 0.056233  | 0.01142   | -0.09608  | 0.093777 | -0.08229 | 0.017377 | 0.011254 | -0.05999  | 0.066686 | 0.142399 | -0.03807 | -0.10381 | 0.006254 | 0.191614 | -0.01067 |          |
| 16       | intake116 | さば      | Saury          | 0.20178   | -0.05581 | 0.001467 | -0.08374 | 0.12128  | -0.07037 | -0.01677 | 0.063026 | -0.15131  | 0.078923 | -0.11011 | 0.168488  | -0.06282  | -0.0323  | -0.09156 | 0.170088 | 0.033754  | 0.031895  | -0.01624  | -0.05715  | -0.06437  | -0.05963  | 0.058273  | 0.042291  | -0.14933 | 0.195895 | -0.07786 | -0.04472 | 0.07394   | -0.01199 | 0.095908 | 0.00801  | -0.1492  | -0.0761  | -0.1712  | -0.00349 |          |
| 17       | intake117 | ぶり      | Yellowtail     | -0.00779  | 0.107402 | -0.10674 | 0.025544 | -0.10399 | 0.174352 | -0.10872 | -0.02301 | 0.116077  | -0.12373 | 0.107071 | -0.20149  | 0.159963  | -0.21169 | 0.071457 | 0.256471 | -0.11017  | -0.10371  | -0.02825  | 0.213878  | -0.095638 | -0.04091  | 0.095631  | -0.15586  | 0.021914 | -0.19251 | -0.02483 | 0.062983 | 0.121453  | -0.26775 | 0.166994 | -0.12375 | 0.123947 | -0.06693 | -0.07227 | 0.11753  |          |
| 18       | intake118 | いか      | Cuttlefish     | 0.219048  | -0.04126 | -0.1023  | 0.03577  | 0.023206 | 0.074462 | -0.13723 | 0.114158 | -0.07784  | 0.141228 | 0.030899 | -0.01659  | -0.02894  | 0.082455 | 0.057568 | -0.02504 | 0.03847   | -0.02656  | 0.02693   | -0.07362  | -0.06012  | 0.020333  | 0.040321  | -0.30007  | 0.091491 | -0.0591  | 0.158886 | -0.04929 | 0.062545  | 0.05921  | 0.121793 | -0.00505 | -0.07443 | 0.017679 | -0.01399 | 0.078315 |          |
| 19       | intake119 | えび      | Shrimp         | -0.06226  | 0.067819 | 0.060781 | -0.05107 | -0.00893 | 0.260139 | -0.07814 | 0.072764 | -0.24147  | 0.153769 | -0.02924 | -0.04555  | -0.04335  | 0.043923 | 0.086024 | -0.07796 | 0.01761   | -0.0884   | 0.058734  | -0.126739 | -0.06538  | -0.13407  | 0.050207  | 0.183696  | -0.11425 | 0.06051  | 0.03398  | 0.173091 | -0.34201  | 0.184561 | -0.04414 | -0.11368 | -0.02322 | -0.00135 | 0.037566 | -0.00881 |          |
| 20       | intake120 | えび      | Shrimp & lob   | -0.01611  | 0.078712 | -0.18091 | 0.144538 | -0.15961 | 0.236049 | -0.06274 | 0.112534 | -0.1448   | 0.09148  | -0.07143 | 0.152713  | -0.0593   | -0.09417 | 0.048449 | 0.065427 | -0.12358  | -0.10402  | 0.062079  | -0.04397  | -0.07008  | 0.045429  | -0.12583  | -0.044928 | 0.074488 | -0.05421 | 0.071852 | -0.0441  | 0.092774  | -0.18447 | 0.096675 | 0.009072 | -0.23583 | 0.087629 | -0.00411 |          |          |
| 21       | intake121 | かに      | Crabs          | 0.056929  | 0.04328  | -0.05299 | 0.147433 | 0.002269 | 0.104446 | -0.24011 | 0.070373 | -0.07949  | -0.1755  | 0.250401 | -0.22072  | 0.027293  | 0.126523 | -0.0307  | -0.02263 | 0.077008  | 0.114684  | -0.06668  | -0.13685  | 0.067255  | -0.1107   | 0.030002  | 0.074903  | -0.01616 | -0.07875 | -0.01005 | -0.01005 | -0.143908 | -0.15222 | 0.071737 | -0.15925 | -0.00082 | -0.00082 | -0.00082 | -0.00082 |          |
| 22       | intake122 | あさり     | Shell needed.  | -0.00782  | -0.13560 | -0.05134 | 0.096108 | -0.05627 | 0.084117 | 0.162723 | -0.07182 | 0.178421  | -0.08019 | -0.01118 | -0.02307  | 0.04354   | 0.059862 | -0.0576  | -0.1010  | -0.10243  | -0.19062  | -0.070257 | -0.15953  | -0.0357   | 0.168174  | -0.06765  | 0.044187  | -0.03999 | -0.05659 | 0.215359 | -0.21723 | 0.031523  | 0.127648 | -0.18398 | -0.0197  | 0.080041 | -0.00082 | -0.00082 | -0.00082 |          |
| 23       | intake123 | しじみ     | Fresh water    | 0.135129  | -0.05744 | -0.10695 | 0.080198 | 0.098829 | 0.024263 | -0.16272 | -0.04982 | 0.066646  | -0.01339 | -0.08119 | -0.08707  | 0.050498  | -0.02594 | 0.225463 | -0.1583  | 0.053795  | 0.094026  | -0.24611  | -0.1838   | 0.4267    | -0.18127  | -0.01675  | -0.11048  | 0.016133 | -0.10351 | -0.00689 | -0.06883 | 0.169343  | -0.08196 | -0.09672 | 0.04083  | -0.17444 | -0.02463 |          |          |          |
| 24       | intake124 | かき(貝)   | Oysters        | -0.04717  | 0.043124 | -0.08626 | -0.12572 | 0.02577  | 0.239918 | -0.04253 | -0.0527  | -0.06696  | 0.203739 | 0.066466 | -0.28563  | 0.040026  | -0.01122 | -0.21449 | 0.241847 | -0.05162  | 0.20709   | -0.03904  | -0.08594  | -0.01749  | -0.14236  | 0.142306  | 0.094538  | -0.10427 | -0.02541 | -0.02769 | 0.088271 | -0.10682  | 0.063    | -0.01928 | 0.228236 | 0.037561 | -0.15066 | 0.05496  | 0.016726 |          |
| 25       | intake126 | はたて(貝)  | Scallops       | -0.197305 | -0.00551 | -0.05644 | 0.005037 | 0.009654 | -0.0148  | -0.02954 | -0.11074 | -0.2004   | 0.07474  | -0.18857 | 0.197153  | -0.07639  | -0.0115  | -0.08338 | 0.098926 | 0.040493  | -0.05102  | 0.171119  | -0.02454  | -0.13465  | 0.027713  | 0.024531  | 0.068416  | -0.01524 | -0.04875 | 0.036329 | -0.10413 | 0.09574   | -0.05041 | 0.19348  | -0.0749  | -0.04022 | 0.035366 | -0.05086 | 0.017828 |          |
| 26       | intake127 | 塩 かつお   | Salted salmon  | 0.221112  | -0.07    |          |          |          |          |          |          |           |          |          |           |           |          |          |          |           |           |           |           |           |           |           |           |          |          |          |          |           |          |          |          |          |          |          |          |          |

Factor37 Factor38 Factor39 Factor40 Factor41 Factor42 Factor43 Factor44 Factor45 Factor46 Factor47 Factor48 Factor49 Factor50 Factor51 Factor52  
0.078857 -0.06615 0.001858 0.050787 -0.2017 0.185083 0.060048 -0.08897 -0.017 -0.0957 -0.07654 -0.03181 0.225009 0.203506 -0.00531 -0.027005  
0.06917 -0.06872 0.19448 0.074108 0.051565 0.052429 -0.13588 0.007585 0.026074 -0.14407 0.134004 -0.01111 0.047053 -0.02461 -0.00779 0.07602  
-0.062 -0.11412 -0.00406 0.092745 -0.06574 0.132026 -0.0148 -0.13756 -0.11949 -0.06259 -0.01032 0.076407 0.052434 0.131233 -0.0724 -0.1206  
-0.2048 -0.03516 0.120667 0.011374 -0.20132 0.151585 -0.09254 0.058296 0.103006 -0.06438 0.065606 -0.05001 0.073501 -0.06572 0.026828 -0.05215  
0.025808 0.04618 0.139503 0.007699 -0.17793 0.147955 -0.02085 0.019668 0.005576 0.049312 0.003189 0.041176 -0.24882 0.133076 0.050897 0.004483  
-0.18566 -0.05939 0.10603 -0.00149 -0.01224 0.011872 -0.02287 0.075474 0.071897 -0.07579 -0.07113 0.097755 0.141894 0.024985 0.143393 -0.01127  
0.123272 0.055192 -0.05914 -0.11625 0.062536 0.087376 0.009944 -0.02313 0.029355 0.060263 -0.12807 -0.03531 -0.0821 0.078194 -0.16863 -0.13472  
0.210088 -0.25905 0.117925 -0.24555 0.106214 0.036703 -0.03098 -0.04614 0.182148 0.027817 0.091982 -0.12963 0.01521 -0.02582 0.086547 -0.11963  
-0.01734 -0.00977 -0.026 -0.06003 0.024954 -0.03419 -0.03549 0.041219 -0.08154 0.008631 -0.00775 0.120688 0.041127 0.104075 -0.02622 0.079559  
-0.02658 -0.07083 0.146852 -0.04106 0.001547 -0.01889 0.068077 -0.07499 -0.04005 -0.09337 -0.02869 -0.11779 0.002035 -0.06741 0.035483 -0.0738  
0.036351 -0.04176 -0.04352 -0.02067 0.076392 -0.12571 0.228451 -0.16289 0.010881 -0.0457 -0.02366 0.0119894 -0.10557 0.105827 0.042714 0.045706  
0.026084 -0.12279 0.079445 -0.04465 -0.02445 0.142511 -0.14423 0.175352 -0.0713 -0.01025 -0.20847 -0.08113 0.014781 -0.05875 -0.03387  
0.070529 -0.0504 -0.07618 0.050942 0.075664 -0.03065 0.170724 -0.13587 0.099434 -0.08582 -0.05025 0.11973 -0.04236 -0.05759 -0.08846 -0.01141  
0.008773 0.045179 0.106996 -0.02316 -0.02072 -0.01948 0.068392 -0.0575 -0.10688 -0.09347 0.015643 0.030828 -0.09429 0.180645 -0.03366 -0.05113  
0.11799 0.081893 -0.03987 -0.05521 -0.06724 -0.04546 0.248266 -0.03894 -0.10454 0.145502 0.207244 -0.04989 -0.05126 0.057043 -0.07652 -0.00239  
0.103327 -0.13728 0.138894 -0.1644 -0.03282 0.032139 -0.09604 -0.02845 -0.08737 0.136223 -0.0506 0.033073 -0.06846 0.131481 0.116362 0.01465  
0.058988 0.052525 -0.05349 0.01568 0.07914 0.008072 -0.01534 -0.05453 -0.07877 0.094655 -0.02813 0.084963 -0.15046 -0.088332 -0.032  
-0.15925 0.014386 0.131816 -0.00814 -0.04191 0.035719 -0.14841 0.105071 0.004125 0.147242 -0.03619 -0.08162 0.018123 0.069256 -0.09709 0.064745  
-0.09036 -0.07695 0.059554 0.111112 -0.00047 -0.24266 0.114399 0.052642 0.001394 -0.08619 -0.02548 -0.0282 0.051978 -0.04734 -0.07501 -0.03263  
0.066333 -0.16206 0.109834 0.048498 -0.1387 -0.02329 0.078679 0.144898 -0.09425 -0.06182 0.068855 0.077367 -0.09256 -0.00806 0.041579  
0.018698 -0.03637 0.172119 -0.0692 -0.04639 0.060603 -0.0987 0.126108 0.028551 -0.00789 -0.10553 -0.03159 0.113612 -0.03327 -0.08463 0.016669  
0.025241 0.064589 -0.13986 0.047022 0.136896 -0.20055 0.232902 -0.21067 0.0279 -0.02082 0.046734 -0.06452 0.091693 0.017681 0.024335 0.010464  
0.15499 -0.28358 0.278194 -0.146 -0.15304 0.108941 0.01405 -0.05635 0.141795 -0.06341 -0.07948 -0.03704 -0.01026 -0.12784 -0.0105 0.04  
0.075172 9.44E-05 -0.09991 0.134431 -0.14613 0.134943 -0.07458 -0.00267 0.039804 0.083304 -0.07694 -0.08302 0.132613 -0.18441 0.092625 -0.14227  
0.093553 -0.22248 -0.06966 0.263309 -0.0519 -0.04173 0.079092 -0.06279 0.078562 -0.01553 0.131234 -0.12987 0.061546 -0.06284 -0.06719 0.024647  
0.035897 -0.03724 -0.10613 0.162676 -0.02929 -0.07496 0.030013 -0.07158 0.032381 -0.03701 0.087936 -0.08174 -0.02227 -0.16154 0.084734 0.075649  
-0.03691 0.114708 0.113302 0.077481 -0.113 -0.00779 -0.02267 0.065867 0.064382 0.103216 0.000464 -0.12306 0.110769 0.138769 -0.02068 0.18595  
0.16381 0.211153 0.046661 0.130371 -0.04682 -0.1166 -0.01627 0.080749 -0.021209 0.022792 -0.02598 0.013832 0.11005 0.13932 -0.01432  
-0.04537 0.139268 -0.26843 0.205015 0.02714 0.065051 -0.01454 0.029027 0.086545 -0.0045 -0.01779 0.046181 0.072245 -0.0121 -0.12723 -0.01437  
0.06553 -0.03564 0.064041 0.032934 0.044491 -0.05546 0.076762 -0.24351 0.031499 -0.01155 -0.06303 -0.01573 0.069983 0.051262 0.003008 -0.01527  
0.000667 -0.0172 0.10451 0.056748 0.047486 0.015656 0.006486 0.035123 0.012148 0.043594 -0.02173 0.00351 -0.07212 0.106251 -0.0511 0.049198  
0.057869 0.141273 -0.21082 -0.03909 0.005985 0.125938 0.058288 0.005914 0.062588 0.093132 -0.18731 0.174253 0.002397 -0.13546 -0.03579 0.098847  
0.077284 0.014891 0.032795 -0.00795 -0.072128 -0.181426 -0.06353 -0.152453 -0.028761 -0.03722 0.080528 -0.04963 -0.03729 0.065268 -0.06566 0.18523  
0.097869 0.011724 0.086597 -0.09584 0.033405 -0.011937 -0.0695 0.042977 -0.01227 0.147283 -0.09814 0.147365 0.113003 -0.03443 -0.03833 0.06771  
-0.01482 0.028381 0.029072 0.03051 -0.05075 0.035518 -0.14456 0.026846 -0.01526 -0.00532 -0.16325 0.023248 0.118067 -0.00507 0.199217 0.004624  
0.00598 -0.10708 -0.14708 0.06012 -0.06224 0.145186 -0.00235 0.02203 -0.14685 -0.12307 0.10969 0.000192 -0.12359 0.091431 -0.0931 0.102478  
0.032148 1.56E-06 -0.03127 -0.08414 0.09628 -0.04171 -0.00645 0.130953 -0.104 -0.15525 0.091633 0.163527 -0.10685 -0.05607 -0.04683 0.003955  
-0.14394 0.177453 -0.08119 -0.58762 0.049332 0.041598 -0.16458 0.081514 0.060513 -0.0645 0.112637 -0.05644 0.115745 0.028478 -0.01081 -0.1285  
0.11821 0.171139 -0.01294 -0.15966 -0.02811 -0.05721 -0.06933 -0.03213 -0.107244 -0.03306 0.067448 0.0015908 0.019408 0.027197 0.062344 0.042625  
-0.02094 0.088612 0.034088 -0.03911 -0.15397 0.159997 -0.00344 0.091736 -0.23851 -0.01314 0.065844 0.028661 0.074435 -0.11698 -0.13071 -0.11844  
0.063832 -0.0683 0.083693 -0.07219 0.005912 0.009391 0.077125 -0.02847 0.024946 -0.0551 -0.20203 -0.07002 0.163874 -0.16887 -0.14633 0.106963  
0.003763 0.033675 -0.00472 -0.0699 0.144726 0.068894 -0.06827 -0.02084 -0.03994 -0.07568 0.015955 0.048623 -0.12735 0.037918 -0.16895 0.10788  
0.080653 -0.14734 0.19835 -0.18371 -0.11336 0.041798 0.078744 -0.01911 -0.02718 0.011762 0.109176 0.035987 -0.05754 -0.07903 0.126898 0.013425  
-0.11518 0.152498 -0.06548 -0.03228 0.168558 -0.03236 0.10841 0.023416 0.133465 -0.00487 -0.108236 -0.02267 0.04368 -0.02267 0.04368  
0.050706 0.096611 -0.10542 0.087574 -0.1724 0.158716 -0.03614 -0.05382 -0.01481 0.064039 -0.12082 0.107853 0.080862 -0.15867 -0.02865 -0.00852  
0.173363 -0.21874 0.012376 -0.10002 0.042308 0.071734 -0.07946 0.04023 -0.12529 0.098965 -0.01453 0.136296 -0.0087 0.227111 -0.11438 -0.02519  
-0.01749 0.028316 0.034943 0.039569 -0.02344 0.064276 0.054534 0.022467 -0.04968 0.067765 -0.0888 -0.03797 -0.03515 0.05889 -0.13056 0.032137  
-0.06216 0.064428 -0.20047 0.08757 -0.11695 0.118751 0.040856 0.104841 -0.13828 0.087541 ##### -0.01377 0.093809 -0.1227 0.017863 0.012173  
0.097701 -0.00976 0.18717 0.152947 0.024294 0.053208 -0.12694 -0.02525 0.243111 -0.05906 -0.06188 0.0491 -0.0231 0.10145 0.041908 -0.00301  
0.079722 -0.12556 0.026065 0.051672 0.125412 -0.063 -0.06933 -0.00213 -0.11674 0.094834 -0.05439 -0.01548 -0.00903 0.07251 -0.07136 -0.06188  
-0.06951 0.052239 0.06972 0.027862 0.126165 0.127487 -0.2425 0.07917 0.064024 -0.0472 -0.00122 0.153752 -0.10483 -0.16115 0.059425 0.039165  
-0.04135 -0.01945 0.102734 0.002251 -0.072 -0.0521 0.062969 -0.11597 -0.09372 0.00361 -0.21551 -0.099 -0.01053 0.008282 -0.00831 0.048167  
0.042132 0.009197 -0.01434 0.068954 -0.0006 -0.05833 -0.02569 0.043357 -0.00745 -0.03917 0.02219 0.021897 0.113492 -0.0175 0.035665 -0.02159  
0.143758 -0.11284 0.136802 -0.16179 0.248912 0.111538 0.001386 -0.03244 -0.03084 0.120478 -0.04054 0.076265 0.034937 -0.13041 0.104791 0.085333  
0.035828 -0.06811 0.091977 -0.03773 0.114986 -0.12143 0.067841 -0.13159 0.009742 -0.01037 0.093742 -0.063525 0.112981 -0.14993 0.174109  
0.286558 -0.03427 0.18956 -0.13264 0.181757 -0.03291 -0.03915 0.072501 -0.05938 0.081894 -0.04494 0.085192 -0.07473 -0.06832 -0.02846 -0.02195  
0.102055 -0.04098 0.065264 -0.07217 -0.0255 0.160124 -0.16636 -0.01729 0.058844 0.025402 0.143757 -0.15512 0.050253 -0.02343 0.038482 0.109176  
0.102681 -0.02495 -0.00092 -0.07855 0.125629 0.164015 -0.18051 0.143234 0.09016 0.016382 0.188998 0.063742 0.05333 0.072051 0.069982 -0.01619  
-0.2346 0.030624 -0.06726 -0.15823 0.192854 0.030458 -0.10589 -0.02847 -0.10122 0.032268 0.169336 -0.18936 0.032783 -0.06651 -0.03452 -0.01811  
0.028119 -0.06742 -0.02523 0.14738 -0.12932 -0.03524 0.098177 0.008711 0.12656 0.188129 0.054566 0.052919 0.008588 -0.15902 -0.08741 0.226304  
0.06886 0.165305 -0.12306 0.010131 0.150062 0.008906 -0.02868 0.144496 -0.00268 0.0040132 -0.14886 0.022672 0.14886 0.034281 0.12038 0.00499  
-0.03782 0.083771 -0.132 0.022547 -0.03356 0.042185 0.047075 -0.02134 0.024361 -0.0127 -0.10812 0.05473 0.025637 0.076175 0.127544 -0.14298  
-0.01587 0.000427 -0.0511 0.002256 -0.20423 0.07358 -0.02489 -0.0363 -0.12082 -0.04918 0.06057 -0.07671 0.044787 -0.01376 -0.02993 -0.00869  
-0.18277 -0.08935 0.158714 0.156362 -0.33887 0.084545 0.1671 -0.11104 0.093888 -0.09344 0.0242 0.090757 -0.06364 -0.02726 0.015922 -0.05742  
0.041712 -0.02351 0.106796 -0.04209 0.109805 -0.11151 0.035118 -0.12459 0.172094 -0.03589 0.067867 0.109234 -0.04259 0.115845 -0.04426 0.082453  
-0.1756 0.1578617 -0.04882 0.054584 0.068625 0.037578 -0.01631 -0.13633 0.06954 -0.01576 0.069543 -0.064564 0.163706 0.06812 0.160174  
0.256754 -0.30483 -0.12879 0.144531 -0.00719 -0.1913 0.235808 0.122903 -0.15055 0.084568 -0.10866 0.080828 -0.12394 0.080761 0.100584 -0.05831  
0.289948 -0.0384 -0.18857 0.097164 -0.07078 -0.03355 -0.03461 -0.02106 0.060558 -0.12978 0.28786 0.062998 0.017914 -0.16419 0.09706 0.055959  
-0.0538 0.033138 0.132698 0.076904 -0.08917 0.025925 0.179401 -0.10808 0.043814 -0.15209 -0.08817 0.040996 -0.096 -0.00712 0.171835 -0.14544  
-0.11664 -0.06433 -0.06567 0.050397 0.241329 -0.10561 -0.03463 0.083938 -0.18629 -0.05265 0.022906 -0.04836 -0.0886 -0.16292 -0.12316 -0.05501  
-0.04369 -0.07109 -0.19763 -0.02433 -0.00579 0.013055 -0.017596 -0.00149 0.137058 -0.02148 0.050533 -0.03447 -0.101833 -0.04147 -0.085337  
-0.06108 -0.1418 0.287678 -0.1547 0.109314 0.150555 -0.02969 0.040452 -0.08554 0.153143 -0.07823 0.008873 -0.07841 0.099171 0.003456 -0.02177  
0.123216 0.044754 -0.05593 -0.01168 -0.0292 -0.00371 -0.01375 -0.00039 -0.00114 -0.03234 -0.05525 0.099129 -0.04613 0.145431 0.095397 0.150981  
-0.05666 0.180951 0.019463 0.016748 0.09207 -0.14561 0.061254 0.066372 0.088336 0.050721 0.117322 0.002856 -0.09662 0.088099 0.007192 -0.0917  
0.106702 0.109695 -0.16016 0.048612 -0.0796 -0.01499 0.14206 -0.14674 0.174901 -0.21534 0.116185 -0.09513 0.132849 0.051164 -0.03165 0.029272  
-0.19987 0.135839 -0.0672 0.103927 -0.17858 -0.01677 -0.04896 0.080078 -0.09024 -0.11727 0.135539 0.0284 -0.18171 0.027981 0.09535 0.138336  
0.13697 0.083292 0.109471 -0.22776 0.128173 -0.10998 0.038127 -0.02809 -0.2588 0.038228 -0.06707 0.244591 -0.2199 -0.0116 0.169626 -0.02686  
0.191227 -0.02959 0.033181 -0.05127 -0.02415 0.025354 -0.09179 0.20069 -0.16402 0.094688 -0.04734 -0.01321 0.09456 0.036708 -0.06648 0.043253  
-0.16184 0.08124 -0.01398 -0.08729 0.081325 -0.08422 -0.05984 0.170225 0.054529 -0.10845 -0.0464 0.191106 -0.03423 0.105674 -0.19639 0.084888  
-0.06885 -0.0368 0.026607 -0.05253 0.21468 -0.1388 -0.07533 0.00575 -0.10536 0.110227 -0.00579 -0.07103 0.136032 0.020782 0.153273 -0.07498  
0.08666 -0.08622 0.317828 -0.19603 0.127851 -0.15893 0.087683 0.033096 -0.02816 0.042687 0.170017 -0.09078 0.071849 -0.03855 -0.01048 -0.26592  
0.157615 -0.03302 0.161191 -0.03305 0.02798 -0.19078 -0.00957 0.123087 0.021342 -0.03689 -0.06018 0.039408 -0.080693 -0.16896 0.115661  
0.041127 0.002171 -0.04384 0.200002 -0.05166 0.081657 -0.05368 0.012002 0.001478 0.147957 -0.07897 0.041074 -0.00689 0.087708 0.157997 0.044542  
0.025253 0.049818 -0.14159 0.02236 0.030822 0.087587 -0.14584 -0.05712 0.030876 -0.25262 -0.03126 -0.18755 0.058782 0.108563 -0.1378 -0.02854  
-0.03718 0.062651 0.151241 -0.1883 0.126123 -0.18456 0.148095 0.168673 0.02041 -0.164 -0.03558 0.122911 0.298605 -0.05061 0.213414 -0.03212  
0.032294 0.115364 0.060643 -0.08968 -0.14835 0.145763 -0.05642 -0.0773 -0.05329 0.030274 -0.00647 0.050016 0.024694 -0.12625 0.191121 -0.35185  
0.161872 0.077878 -0.00049 -0.13173 -0.04392 0.024119 -0.035663 0.033915 0.069564 -0.20617 -0.04726 0.209654 -0.15549 0.019634 -0.15104 -0.1435  
-0.01189 -0.01511 -0.00961 0.077684 -0.12908 0.07684 -0.12903 0.270819 -0.14753 0.089419 -0.05447 0.130454 -0.14376 0.13064 0.183866 -0.058  
-0.05351 -0.19377 0.057128 0.085215 -0.01685 -0.0491 -0.06348 -0.08343 0.113465 0.040781 0.020477 0.156221 -0.04709 0.012581 -0.03837 0.023739  
0.020342 0.029348 0.002887 -0.03783 0.039559 -0.05815 0.016238 -0.01624 -0.0651 0.031141 -0.06163 -0.0102 0.014246 -0.02128 0.03867 0.004319  
-0.10281 -0.06603 0.098758 0.010568 -0.04846 0.124299 -0.00939 0.067317 0.136293 -0.02838 0.145445 0.008384 -0.13545 0.090283 -0.15391 -0.04791  
0.052611 -0.07132 -0.10244 0.034404 -0.044 0.089288 0.03557

Scores

| No. | 和名    | 英名             | Factor1  | Factor2  | Factor3  | Factor4  | Factor5  | Factor6  | Factor7  | Factor8  | Factor9  | Factor10 | Factor11 | Factor12 | Factor13 | Factor14  | Factor15 | Factor16 | Factor17 | Factor18 | Factor19 | Factor20 | Factor21 | Factor22 | Factor23 | Factor24 | Factor25 | Factor26 |
|-----|-------|----------------|----------|----------|----------|----------|----------|----------|----------|----------|----------|----------|----------|----------|----------|-----------|----------|----------|----------|----------|----------|----------|----------|----------|----------|----------|----------|----------|
|     | 全国    | All Japan      | -0.21098 | -0.67678 | -0.04726 | 0.073236 | 0.453313 | 0.14313  | 0.282368 | 0.269588 | 0.163602 | 0.185976 | 0.160958 | 0.340466 | 0.40971  | 0.362418  | 0.714238 | 0.903378 | 1.706086 | 1.443713 | 2.107047 | 2.117731 | 2.643731 | 2.670214 | 2.286933 | 1.590914 | 1.027947 | 1.159244 |
| 1   | 札幌市   | Sapporo-shi    | 3.619055 | -3.29274 | -2.96245 | 2.609029 | 2.790251 | -0.83559 | 0.34045  | 1.047592 | -4.71462 | 1.454342 | 0.257051 | -0.87044 | -2.02277 | 0.59796   | 1.007841 | -1.28768 | 1.212378 | -0.47348 | -0.06958 | 0.735814 | 0.204683 | -0.56493 | 0.230033 | 0.388029 | -1.47703 | -0.97676 |
| 2   | 青森市   | Aomori-shi     | 1.135639 | -0.84286 | -3.82804 | -0.73989 | -1.44821 | -1.94883 | -1.5247  | 3.38589  | -2.48219 | 0.616346 | -2.96086 | 1.000558 | 0.177934 | -0.46977  | 0.252832 | -0.51205 | -0.33107 | 1.198541 | -0.18768 | -1.39944 | -0.1944  | 0.840367 | -0.03279 | 0.167103 | -0.86744 |          |
| 3   | 盛岡市   | Morioka-shi    | 6.672104 | 1.31627  | 2.60607  | -1.3364  | 2.0743   | 0.169041 | 2.261267 | 2.476585 | 0.389921 | 0.579206 | -0.58772 | 1.874998 | 1.228189 | 0.505825  | -0.50677 | -0.34186 | -0.84229 | 0.321153 | -0.63944 | 1.742617 | 0.571003 | -0.98932 | 0.19905  | -2.29273 | -0.46878 | 1.253974 |
| 4   | 仙台市   | Sendai-shi     | 4.592346 | -1.66187 | 2.115666 | -0.54924 | 1.968129 | 0.389693 | 0.694257 | -0.67544 | -0.40211 | 0.468506 | 1.727302 | -0.24348 | -0.88688 | 0.468391  | -0.73036 | -0.01029 | -0.55087 | -0.38108 | -1.72073 | 0.440287 | -0.45904 | 0.925202 | 0.762444 | 0.461728 | -0.31577 |          |
| 5   | 秋田市   | Akita-shi      | 9.325999 | 1.11752  | -1.36108 | -0.75505 | 0.373552 | -0.27353 | 0.286654 | -1.6711  | -0.76465 | 2.949188 | 1.504421 | 0.682732 | -1.13242 | -0.52195  | 0.017817 | 0.194955 | 1.264653 | 0.389622 | -0.71429 | -0.60539 | -0.20692 | -0.03555 | -0.53009 | -1.01882 | 1.403752 | 2.895439 |
| 6   | 山形市   | Yamagata-shi   | 7.70434  | 5.387739 | 6.88186  | 1.672768 | 2.194653 | 0.374717 | 0.127934 | -0.62029 | -1.4868  | -0.43377 | 0.169703 | -0.7468  | 0.080491 | -1.17008  | 0.585942 | 0.389977 | -1.13416 | 0.220069 | 1.125665 | -0.19849 | -0.48703 | 0.44795  | -0.09946 | 0.866973 | -1.15709 | -0.0012  |
| 7   | 福島市   | Fukushima-shi  | 4.44791  | 1.607546 | 1.180907 | -3.81035 | -0.37922 | -3.56046 | -0.42533 | -1.32396 | 0.089418 | 0.503027 | -0.18579 | 0.468373 | 0.53388  | 0.967886  | 0.741486 | -0.14683 | 1.001649 | 0.337429 | -0.77807 | -0.53381 | -0.459   | 0.178597 | -68515   | 1.730397 | 1.586992 | -1.87712 |
| 8   | 水戸市   | Mito-shi       | -0.5483  | -3.572   | -1.51247 | -1.16907 | 3.623693 | 0.972353 | 1.912044 | -0.7601  | 0.437162 | -1.73952 | -0.35185 | -0.06622 | -0.47027 | -0.20636  | 2.370683 | 0.666739 | -0.12522 | -0.24602 | -0.43918 | -0.24419 | 0.814668 | -1.42332 | 0.061691 | 0.128043 | 0.153248 | 1.098034 |
| 9   | 宇都宮市  | Utsunomiya-shi | -0.05849 | -2.17732 | -1.29993 | -3.56941 | -1.55457 | -3.22261 | -0.75547 | -0.97294 | -0.82859 | -2.87437 | -1.07578 | -0.14711 | -1.07361 | -1.31414  | -0.29998 | -1.33917 | 0.000942 | 2.131714 | 0.126166 | 0.451191 | 0.527894 | -1.34726 | 0.45409  | 0.072471 | -0.13754 | -1.07683 |
| 10  | 前橋市   | Maebashi-shi   | -1.48811 | -2.42461 | 0.217974 | -2.94853 | 1.169686 | -1.4745  | 2.132145 | 0.805567 | 1.144434 | -1.70874 | -0.55789 | -0.16977 | 1.544751 | 0.578849  | -0.21278 | -0.21517 | 0.365263 | -0.13262 | -0.57513 | -1.28414 | -0.51325 | 0.897934 | 0.711176 | -1.03093 | -0.95558 | 0.567453 |
| 11  | さいたま市 | Saitama-shi    | -0.99408 | -4.5333  | 1.733753 | 1.204974 | -0.77256 | -1.20181 | -0.19903 | -0.90152 | -0.88537 | -0.64394 | 1.483411 | 1.229172 | 2.212843 | 0.083753  | -0.36976 | 0.687757 | 2.149367 | 0.539764 | -0.18408 | 0.088842 | -0.12934 | -1.30139 | -0.65091 | -1.10051 | -0.34839 | -0.28969 |
| 12  | 千葉市   | Chiba-shi      | 1.642702 | -5.23078 | 0.027946 | 1.655038 | 0.70053  | 2.853796 | 0.931978 | -0.63182 | 1.553187 | 0.243068 | 1.134199 | 0.674555 | -1.94477 | -1.44328  | -0.28445 | -0.53367 | -1.22467 | 1.792582 | 2.034591 | -1.41698 | -0.26159 | -0.42195 | -0.38326 | -0.27218 | 0.305508 | 0.46744  |
| 13  | 東京都区部 | Ku-areas of T. | -2.02684 | -6.12983 | 0.613402 | -0.59197 | -0.49644 | -0.28227 | 0.150502 | -0.15432 | -0.26685 | -0.63227 | 1.380277 | 0.24027  | 0.835518 | 1.669725  | 0.999025 | -0.48745 | -0.73565 | -0.73625 | -0.13408 | -0.38561 | 0.691335 | -0.16168 | 1.151078 | 0.932664 | -0.02505 | -1.13014 |
| 14  | 横浜市   | Yokohama-shi   | -0.63933 | -7.01889 | 1.40199  | 0.79037  | -2.90897 | 0.278638 | 0.647005 | 1.268403 | -0.06736 | -0.81097 | -0.16319 | -0.19464 | 0.547731 | 1.056682  | 1.263701 | 0.80449  | 0.229598 | 0.014598 | 0.380344 | -0.68428 | -0.35643 | -1.89819 | -0.71466 | 0.237452 | 0.394889 | 0.64037  |
| 15  | 新潟市   | Niigata-shi    | 8.938286 | -1.61605 | -1.06959 | 0.193473 | -1.43888 | 2.343814 | 2.397455 | 1.826114 | 1.116156 | -3.39959 | 0.810234 | -0.99283 | -0.21781 | 0.791997  | -1.15563 | 0.387815 | -0.18347 | 0.062203 | -1.28983 | -0.46624 | 1.25676  | 2.665434 | -1.92098 | 1.102665 | -1.04414 | 0.55573  |
| 16  | 富山市   | Toyama-shi     | 2.836594 | -0.16306 | -0.36844 | -1.50384 | -0.96656 | -0.11718 | -3.07978 | -0.35354 | 1.919891 | -1.33965 | 1.323191 | -0.62595 | 0.271891 | -2.32935  | 1.35705  | 1.301437 | -1.09779 | -1.31582 | -0.74768 | 1.551575 | -1.08538 | 0.025159 | 1.219782 | -0.94774 | 0.71315  | -1.55386 |
| 17  | 金沢市   | Kanazawa-shi   | -0.27801 | 0.196139 | -0.2049  | 0.176312 | 1.518636 | 1.402161 | 0.08002  | 1.594423 | 1.371509 | -2.26268 | -0.83921 | -1.74358 | 1.801703 | 0.931705  | -0.7998  | -0.0892  | 0.668454 | -0.2881  | 1.046502 | 1.065007 | -1.16295 | -0.02238 | -0.86543 | -0.41592 | 1.349065 | -0.04576 |
| 18  | 福井市   | Fukui-shi      | -1.26493 | 3.205443 | -0.04361 | 0.079538 | 2.758771 | -1.94249 | -1.48056 | 1.352752 | 2.550431 | -0.44808 | 2.039156 | -1.24099 | -0.53927 | -0.98413  | 1.022218 | -1.11676 | 0.863173 | 0.699649 | 0.819127 | 1.603312 | -1.25223 | 0.002467 | -0.04184 | -0.0241  | -0.43151 | -0.91821 |
| 19  | 甲府市   | Kofu-shi       | 1.014598 | -3.30724 | 0.397431 | 1.491813 | 2.801623 | -0.38756 | 1.263474 | -2.16664 | 2.485768 | 2.581563 | -2.04963 | -1.24777 | 0.645037 | 0.61145   | 1.305932 | 0.284113 | -0.39514 | -1.04486 | -0.0811  | -0.64905 | 0.091295 | 0.480443 | 0.550019 | -0.22586 | 0.055313 | -1.81922 |
| 20  | 長野市   | Nagano-shi     | 2.386468 | 0.289742 | 2.506415 | -2.67574 | 0.100471 | -1.75036 | 0.408087 | -3.2888  | -0.3038  | 1.470484 | -0.53134 | -0.25604 | 0.843373 | -0.82858  | -0.35331 | -0.45801 | 0.54005  | -1.67903 | 1.250631 | -1.21979 | 0.907145 | 0.480524 | -0.79651 | 1.240944 | -0.55162 | -0.09252 |
| 21  | 岐阜市   | Gifu-shi       | -2.55375 | 0.389831 | -1.18212 | -1.00013 | 1.241985 | -1.98252 | -1.54321 | 0.765945 | 1.4241   | 1.062162 | 1.064092 | 0.652785 | -1.20145 | 0.502256  | 0.425969 | 1.064584 | -0.86401 | -0.10735 | -0.18036 | -0.99179 | 1.118482 | -0.5206  | 0.096658 | 0.049393 | 1.578574 |          |
| 22  | 静岡市   | Shizuoka-shi   | -0.15556 | -4.254   | 0.107129 | 2.194183 | 0.736199 | 1.248816 | -2.28935 | -3.72323 | 2.959507 | -0.8015  | -2.59961 | 0.661726 | -0.25346 | 1.053943  | -1.29851 | 0.484335 | 0.755819 | 0.586519 | -1.28057 | 0.738722 | -0.36452 | -0.33251 | -0.48569 | 0.347146 | -0.23554 | 0.723371 |
| 23  | 名古屋市  | Nagoya-shi     | -2.2856  | -2.3681  | -0.4978  | -1.16025 | -0.62839 | -0.28532 | -2.48115 | -2.50637 | -1.91992 | -2.45301 | 0.265823 | 1.216939 | 0.400014 | -1.147625 | -0.6412  | 0.265456 | 0.098014 | 0.276519 | 1.68052  | -0.37439 | -1.19336 | 1.764207 | 0.155359 | -0.28621 | -0.71714 | 0.759505 |
| 24  | 津市    | Tsu-shi        | -2.40142 | 1.869195 | 0.751809 | 0.512897 | 2.236339 | 1.261532 | 0.419061 | 1.908747 | 1.826388 | -1.42542 | -1.78763 | 0.477134 | 0.348487 | 0.014887  | 0.389267 | 0.287096 | 0.689735 | 0.194132 | 0.810918 | -1.3685  | -1.98163 | -0.10532 | 1.202202 | 0.946381 | -0.32558 | 0.307608 |
| 25  | 大津市   | Otsu-shi       | -4.51902 | -0.32665 | 1.513911 | -0.99135 | -0.73608 | 0.59907  | -0.18574 | 3.48386  | 0.577673 | -0.71401 | -0.75316 | -1.25748 | -1.86191 | -2.11374  | -0.06037 | -1.2365  | -0.51792 | -0.63501 | -0.72309 | -0.46716 | 0.737162 | 0.594332 | 0.874688 | 0.987804 | 0.784378 | 1.281144 |
| 26  | 京都市   | Kyoto-shi      | -1.80188 | -0.87944 | 3.52853  | 0.627942 | -1.86609 | 3.10763  | -2.24293 | 0.181169 | -1.74047 | 0.352388 | 0.305966 | -0.16824 | -0.4186  | 0.645873  | 0.835955 | -0.62321 | -0.33136 | -0.0213  | -0.8385  | 0.180565 | 1.03576  | -0.06956 | 0.160052 | 0.665503 | -0.62518 | 0.017597 |
| 27  | 大阪市   | Osaka-shi      | -4.26218 | -0.71034 | 0.610485 | 0.464992 | 0.27414  | 1.836389 | -0.92233 | 0.750947 | -3.1884  | -0.36725 | -0.0084  | 0.18541  | -0.21157 | -0.53822  | -0.52967 | -0.71953 | -0.87728 | -0.97123 | -1.23165 | -0.07874 | -0.94083 | 0.301764 | -0.16504 | 0.98797  | 1.644129 | 1.423387 |
| 28  | 神戸市   | Kobe-shi       | -4.72229 | 0.108554 | 0.919488 | -1.92021 | -0.20776 | 2.22174  | -0.21665 | 1.581401 | -0.46525 | 1.473943 | 0.662381 | -0.51489 | -0.20507 | 0.505047  | 1.74464  | 0.21445  | 0.649158 | 0.366894 | -0.41517 | -0.07799 | 0.451106 | 1.110599 | -0.11364 | -2.1651  | -1.30774 | -0.24255 |
| 29  | 奈良市   | Nara-shi       | -1.42644 | 0.54441  | 1.176982 | -0.77914 | -3.38152 | 0.581792 | -2.75735 | 2.623983 | 1.247424 | 2.846407 | -1.0495  | -0.34577 | -0.84445 | 0.709579  | -0.05232 | 0.34781  | 0.679098 | -0.40777 | 0.760079 | 0.024799 | 0.105895 | -0.82782 | -0.67499 | 0.358622 | -0.47632 | 1.451153 |
| 30  | 和歌山市  | Wakayama-shi   | -3.76415 | 0.930059 | -1.31926 | 0.066557 | 2.268001 | 4.301324 | -0.44194 | 0.751764 | -1.01065 | 0.512003 | -1.47591 | 2.974178 | -1.36213 | -1.04054  | 0.964286 | 0.449852 | -0.79791 | 0.049423 | -0.18558 | -0.17677 | 0.939837 | 2.065496 | -1.71748 | -0.87379 | 0.399062 | -2.73048 |
| 31  | 鳥取市   | Tottori-shi    | 2.293442 | 3.2617   | -4.91539 | 0.760101 | 2.037574 | 1.943184 | -4.56146 | 0.340579 | -0.59237 | -2.00254 | 2.18013  | -1.22965 | 0.589535 | 1.105569  | -0.21132 | 0.953148 | -0.34951 | -0.94021 | 0.829964 | -1.34502 | 1.448302 | -1.357   | 0.560633 | -0.10644 | -0.25317 | 0.770922 |
| 32  | 松江市   | Matsue-shi     | 2.54514  | 4.623437 | -0.08326 | 2.564117 | -0.16226 | -0.01578 | -3.38479 | -0.80921 | 1.166223 | -0.43352 | -0.65473 | 0.517559 | 3.165342 | -0.87503  | 0.076346 | -1.39191 | 0.07121  | 1.0703   | -1.51296 | -1.23256 | 2.198416 | -0.54635 | 0.667133 | -1.22064 | 0.689539 | -0.55786 |
| 33  | 岡山市   | Okayama-shi    | -4.18937 | 1.094026 | -1.37857 | -1.03277 | 1.992622 | 0.521619 | -0.16781 | -0.94495 | -2.06585 | 1.641012 | -0.36052 | -0.63492 | 2.086744 | -0.37975  | -0.50552 | -0.03782 | 0.239422 | 0.056643 | 1.406503 | -0.54809 | 0.064738 | -0.39723 | -1.3705  | 0.285572 | 0.307509 | -0.1139  |
| 34  | 広島市   | Hiroshima-shi  | -1.5519  | -0.04676 | -1.41146 | -2.02345 | -1.72575 | 3.080765 | 0.592866 | -0.07194 | 0.24258  | 3.274404 | 0.866496 | -0.3702  | 0.731912 | -1.39206  | -1.93894 | 1.085311 | -0.08762 | 0.583657 | -1.0085  |          |          |          |          |          |          |          |

| Factor27 | Factor28  | Factor29 | Factor30 | Factor31 | Factor32 | Factor33 | Factor34 | Factor35 | Factor36 | Factor37 | Factor38 | Factor39 | Factor40 | Factor41 | Factor42 | Factor43  | Factor44 | Factor45 | Factor46 | Factor47  | Factor48 | Factor49 | Factor50 | Factor51 | Factor52 |
|----------|-----------|----------|----------|----------|----------|----------|----------|----------|----------|----------|----------|----------|----------|----------|----------|-----------|----------|----------|----------|-----------|----------|----------|----------|----------|----------|
| 1.036234 | 0.402844  | 0.154534 | -0.03118 | 0.206796 | 0.012433 | -0.02234 | 0.300142 | 0.139297 | 0.165307 | 0.003216 | -0.19226 | 0.069979 | -0.14294 | -0.05993 | -0.07065 | 0.201779  | 0.236415 | 0.019638 | -0.28057 | 0.050795  | 0.219073 | 0.122446 | -0.26172 | -0.05926 | -0.14297 |
| 0.511653 | 1.353254  | -0.69075 | -0.25708 | 0.014497 | 0.229348 | -0.08766 | -0.7838  | -0.25519 | 0.893675 | 0.03202  | -0.1915  | 0.688483 | -0.3959  | 0.405486 | -0.26093 | -0.30601  | -0.00543 | 0.068337 | 0.423944 | -0.56213  | -0.21958 | -0.35605 | 1.266914 | 0.118446 | -0.52612 |
| 0.342927 | -0.76891  | -0.13371 | -0.35255 | 1.058635 | -0.13358 | -0.16884 | 0.716671 | -0.26485 | -0.24654 | 0.352259 | -0.14917 | -0.54017 | 0.793941 | -0.50083 | 0.442896 | 0.542847  | -0.32698 | 0.574448 | -0.62447 | 0.797432  | -0.48968 | -0.57703 | -0.84751 | 0.005731 | 0.151352 |
| 0.440715 | -0.48283  | 0.596485 | -0.31791 | -1.20053 | -0.67791 | 0.942541 | 0.045135 | -0.2203  | -1.54628 | 0.593248 | -0.40901 | 0.387186 | -0.27268 | 0.26433  | -0.30895 | 0.225317  | 0.034427 | 0.622737 | 0.541028 | -0.53241  | -0.67292 | 1.251918 | 0.552267 | 0.69061  | 0.414711 |
| -0.57102 | 0.321769  | 0.028795 | 0.190456 | 0.08539  | 0.166524 | -0.12909 | -0.51579 | 1.02355  | -0.78752 | 0.496897 | -1.46244 | 0.118626 | -1.29138 | -0.10768 | -1.24355 | -0.8746   | -0.09906 | 0.290319 | -1.23676 | 0.254117  | 1.004427 | -0.95355 | -1.55858 | 0.677403 | -0.62331 |
| -0.83358 | -0.62178  | 0.178062 | -0.13146 | 0.869291 | -0.34884 | -1.18593 | -0.65022 | 0.784597 | 0.758669 | -1.23362 | 0.476062 | -0.23289 | 0.600977 | -0.6507  | 0.135491 | -0.31777  | -0.53773 | -0.91918 | 0.700829 | -0.72555  | 1.088565 | 0.536265 | 0.204483 | -0.1757  | 0.305321 |
| -0.23233 | -0.6344   | 0.286927 | 0.415965 | -1.22488 | 0.698626 | -1.52252 | 0.803581 | -0.13858 | 1.312373 | -0.10146 | 1.08359  | 0.545651 | 0.15082  | 0.92155  | -0.01623 | -0.36757  | 0.308093 | 0.62219  | -0.1291  | 0.014534  | -0.28656 | -0.01335 | -0.23663 | -0.33105 | -0.48531 |
| -0.01457 | 0.1268754 | 0.831331 | 1.141903 | -1.05688 | 1.206252 | -0.12779 | -0.10766 | -0.04672 | -0.77884 | 0.66747  | -0.29914 | 0.245121 | 0.115268 | 0.420104 | 0.204977 | 0.725757  | 0.208821 | 0.035852 | -0.25909 | -0.120886 | -0.7798  | -0.61539 | 0.667095 | -0.93655 | 1.103006 |
| -1.4548  | 0.791106  | -0.84509 | 0.545368 | 0.914585 | -0.44066 | -0.98711 | 0.906835 | -0.18144 | -2.00441 | 0.322006 | 1.069998 | -0.52738 | 0.0662   | -0.17741 | 1.593167 | -1.36367  | 1.043091 | 0.078211 | -0.3284  | 0.291458  | -0.89111 | -0.03095 | 0.04555  | -0.0138  | -0.50143 |
| -0.27351 | -1.28444  | -0.29445 | 0.649611 | -0.84466 | 0.37668  | 0.512955 | -0.86856 | 0.57027  | 0.1892   | -0.48341 | 0.891169 | 0.096019 | -0.16133 | 0.675085 | -0.04363 | -0.3599   | 0.833227 | -0.82292 | 0.857139 | 1.253863  | 0.979106 | 0.402111 | -0.21259 | 0.503884 | -0.28209 |
| 2.116568 | 0.8227    | -0.44259 | -0.52097 | -0.27424 | 0.937426 | 0.44391  | 0.749684 | 0.433373 | -0.06917 | -1.43707 | 0.83235  | -0.34263 | 0.497569 | -0.77933 | -0.43368 | 0.535904  | -0.92136 | -0.76753 | -0.58251 | -1.13753  | 0.252758 | -0.53901 | 0.15384  | 0.706094 | -1.42015 |
| 0.710624 | -1.77356  | -1.80394 | 0.28251  | -0.78809 | -0.04076 | 0.566449 | 0.691097 | 0.29276  | 0.78721  | 0.227312 | -0.24964 | -0.01173 | -0.477   | -1.1096  | 0.832643 | -0.4929   | -0.00292 | 1.768744 | -0.00036 | 0.323336  | 0.303132 | -0.9193  | 0.262766 | -0.94494 | 0.390085 |
| 0.307556 | 0.849309  | 1.775699 | 0.584375 | -0.05861 | -0.12965 | 1.504367 | 1.340356 | -0.35836 | -0.43538 | -0.1999  | -0.23075 | 0.832734 | -0.35435 | -0.24457 | 0.267479 | -0.02417  | -0.72032 | -0.04952 | 0.747332 | 0.102742  | -0.06861 | -1.25103 | 0.076029 | 0.164466 | 0.327304 |
| -1.58118 | -0.25675  | 0.277719 | -1.99013 | -1.41374 | -1.25832 | -1.2609  | 0.672498 | 0.080568 | 0.843861 | 0.937208 | 0.142359 | 1.79204  | 1.366695 | 0.076136 | -0.31412 | 0.742545  | -0.84745 | 0.070622 | 1.430761 | -0.33798  | 0.374157 | -0.04593 | -0.71146 | -0.18192 | 0.188766 |
| 1.540428 | 0.336032  | 1.519748 | -0.07003 | 0.36225  | 0.141225 | -1.07451 | -1.31219 | 0.250658 | 0.933082 | -0.51834 | -1.16012 | -1.17809 | -0.96131 | 0.016311 | -0.66837 | 0.346481  | 0.487834 | -0.52745 | 0.538768 | 0.435577  | -1.34778 | 0.892117 | -0.27399 | -0.14555 | -0.29218 |
| -0.82655 | -0.03819  | -1.09674 | 0.010344 | 0.647827 | 0.284421 | 0.971092 | -0.05791 | -0.35655 | 0.430667 | -0.04065 | -0.32989 | 0.494168 | 0.032229 | -0.19428 | -0.41109 | 0.572475  | 0.869141 | -0.39769 | 0.434653 | 0.560434  | -0.32921 | 0.108695 | -0.11796 | -0.45166 | 0.459832 |
| 0.211734 | 0.894421  | 0.19177  | -1.37263 | 0.625959 | 0.118559 | 1.449409 | -0.07845 | -0.2038  | 1.210718 | -1.17472 | 0.325892 | 0.7884   | -0.26899 | -0.41316 | 0.053134 | -1.08455  | 0.147425 | 0.084681 | 0.587573 | -0.05525  | -0.45941 | 0.00321  | 0.257355 | -0.12318 | 0.442544 |
| -1.33519 | -0.25135  | 0.325102 | 0.188866 | 0.907478 | -0.65979 | 0.671486 | -0.38812 | 0.505401 | -0.11617 | -0.65805 | -1.08103 | -0.6924  | 0.384646 | 1.920607 | 0.459986 | -0.2418   | -0.83161 | 0.725139 | 0.591542 | -0.34107  | 0.769518 | -0.79054 | 0.739937 | -0.12363 | -0.90693 |
| 0.429382 | 0.624284  | -0.64735 | 0.661289 | 1.136967 | -1.13485 | -0.42689 | 0.09445  | 0.370148 | 0.095638 | 0.667286 | 0.1106   | -0.60391 | 0.278466 | -1.28181 | -0.06657 | 1.288103  | -0.54415 | -0.49269 | -0.09479 | -0.06527  | -0.54126 | 0.38401  | -0.98609 | 0.541526 | 0.321425 |
| 0.83194  | -1.95473  | -0.55911 | 2.330739 | 1.118153 | 0.653705 | 1.158825 | 0.204907 | -0.40541 | 0.050119 | 0.676662 | -0.01576 | 0.059551 | 0.135324 | 0.039295 | -0.76836 | -0.0977   | -0.32344 | -0.6358  | 0.995281 | -0.17525  | 0.646305 | 0.680283 | -0.28527 | -0.07443 | 0.308264 |
| 0.326056 | 0.758047  | 0.50319  | -1.12763 | 0.796729 | -1.85883 | 1.686242 | -0.81926 | 0.258986 | -0.12776 | 0.462028 | 0.554051 | -0.09793 | -0.59672 | -0.16629 | 0.346606 | 0.41888   | -0.33112 | 0.887591 | -0.50356 | 1.432121  | 0.343301 | 0.537008 | 0.527177 | 0.114781 | -0.33201 |
| 1.008485 | -0.91304  | 0.34448  | -0.21923 | -1.34274 | -0.94494 | 0.208383 | -1.93052 | -0.83662 | 0.243189 | -1.03592 | 0.678546 | 0.195219 | 0.98833  | 0.322464 | 0.469304 | -0.19959  | -0.26213 | 0.474541 | 1.697698 | 0.199876  | -0.12084 | -0.10939 | -0.42724 | -1.35015 |          |
| 0.910433 | 0.843297  | -0.23643 | -0.69778 | -0.3447  | -0.40284 | -0.38025 | -0.48163 | -0.15143 | 0.042827 | -0.28088 | 1.210601 | -0.12897 | 0.936595 | 0.893339 | -0.92299 | -0.06711  | -0.38416 | 1.236367 | -0.5647  | -0.00225  | -0.35839 | -0.01031 | -0.22049 | 0.417214 | 0.7415   |
| -0.53524 | -0.44209  | 0.701494 | 0.748568 | 1.264147 | -0.02187 | -0.76888 | 0.07566  | 0.344667 | 0.129355 | 1.856401 | -1.19927 | 0.35321  | 0.224182 | 0.281408 | -0.10145 | -0.120679 | -0.34336 | -0.05896 | -0.21651 | -1.5738   | -0.47777 | 0.912031 | 0.012195 | 0.074513 | -0.33787 |
| -1.04424 | 0.44962   | -0.79329 | -0.61815 | -0.07699 | 0.48578  | -1.49485 | -0.98143 | -0.40923 | 0.117101 | -0.37431 | -0.50918 | 0.862357 | -1.09878 | -0.58995 | 0.682654 | 0.943008  | 0.142478 | 0.460316 | 0.096335 | 0.044608  | 1.412848 | 0.624602 | 0.308632 | 0.93628  | 1.326736 |
| 0.475642 | -1.70581  | 0.226896 | 0.744664 | 0.027229 | -1.18299 | -0.69788 | -0.80623 | -0.4354  | -0.02821 | 0.066598 | 0.322423 | -0.39006 | 0.035267 | -1.01536 | -1.22455 | -0.86532  | 0.063135 | 1.164006 | -0.27025 | -0.79431  | -0.35038 | -0.68518 | 0.787302 | -0.69415 | 0.438426 |
| 0.259503 | -0.81771  | -0.05806 | 0.349633 | 0.446973 | 0.291162 | 1.206575 | -1.62313 | -0.3298  | -1.18829 | -1.47875 | -0.56666 | 0.384981 | 0.728293 | 0.027581 | 2.684348 | 0.652469  | -0.99589 | -0.24472 | -0.45787 | -0.64117  | -0.25336 | 0.073334 | -0.82852 | 0.192636 | 0.15608  |
| 1.720355 | 0.765516  | -0.7619  | 0.554687 | 0.270492 | -0.15594 | 0.593086 | 2.348666 | 1.311693 | 0.910708 | 0.343961 | 0.071833 | 0.086125 | -0.08701 | 0.843605 | 0.808277 | 0.858724  | 0.983403 | 0.186648 | 0.35137  | 0.090972  | 0.50025  | 0.899342 | -0.09761 | 0.339298 | 0.438052 |
| -0.62547 | -0.46501  | 1.343086 | 0.163334 | 1.445949 | 0.543114 | -0.57871 | 0.66336  | 1.255392 | 0.20595  | -0.17808 | 0.110044 | 0.557301 | 0.740646 | 0.839461 | -1.01826 | 1.035195  | 0.36905  | 0.35183  | -1.21352 | 1.428898  | 0.205244 | -0.51692 | 0.499407 | 0.047293 | 1.060578 |
| -1.3206  | 0.118228  | -0.46694 | -0.29019 | 0.018451 | 1.066933 | 0.808425 | 0.21563  | 0.848697 | -0.15342 | 1.085186 | 1.69451  | 0.741566 | -0.85841 | 0.079665 | -0.1861  | 0.284947  | 0.409308 | 0.401855 | 0.911145 | -1.13859  | -0.19394 | -0.22238 | -0.61538 | -0.20935 | -1.25383 |
| -0.28535 | 0.20766   | 0.159579 | -0.73955 | -1.09688 | 0.506479 | 0.317401 | -0.77333 | 0.788351 | -0.04995 | -0.16295 | -0.25609 | -1.12118 | -0.21945 | -0.57217 | -0.104   | -0.05476  | 0.239615 | 0.486742 | 0.305011 | -0.2246   | 0.788108 | 0.113033 | -0.0458  | -0.47559 | -0.60544 |
| 0.463403 | -0.37852  | 0.458386 | 0.829632 | -1.9114  | 0.044052 | 0.921904 | -0.32201 | 0.259392 | -0.7171  | 0.309646 | 0.53838  | -0.49164 | -0.14044 | 0.17948  | -0.55266 | 0.440108  | -0.35825 | -0.06978 | -0.53536 | -0.16201  | 0.498049 | 0.426034 | 0.17127  | -0.01408 | 0.478895 |
| -0.27821 | 1.168513  | -0.06871 | 0.097681 | 1.479668 | 0.013763 | -1.07844 | 0.242946 | -0.72239 | 0.430625 | 0.127403 | -0.43968 | 0.184098 | -0.0761  | -0.13128 | -0.46187 | 0.760268  | 0.261093 | 0.738679 | 0.444776 | 0.232539  | -0.31846 | -0.09919 | -0.18799 | 0.091357 | -0.95187 |
| 0.489333 | -0.7676   | -0.69521 | -1.50784 | 0.029271 | -0.5344  | -0.01227 | 0.005034 | -0.58771 | -1.03448 | -1.5405  | -0.60782 | 0.851548 | 0.362467 | 0.404257 | -1.28109 | -0.88039  | 1.874539 | -0.34    | 0.078142 | -0.95528  | -0.62657 | -0.37828 | -1.03499 | 0.266336 | 0.632389 |
| -0.10978 | 0.844668  | 0.179188 | 1.165377 | 0.047491 | -0.91592 | -0.48049 | 0.258946 | -0.94897 | 0.090848 | -0.21124 | -0.11872 | -1.48732 | -0.05123 | 0.281386 | 0.510574 | 0.888494  | 0.86632  | 0.026185 | 0.835709 | -0.52198  | 0.475613 | -0.51571 | 0.249759 | 0.628412 | 0.181481 |
| 1.19974  | -0.37068  | 0.528235 | -0.43369 | 1.222571 | -0.57904 | 0.130909 | -0.61934 | -0.8693  | 1.319158 | 1.009233 | 1.599728 | 0.595787 | -0.3561  | 1.066283 | 0.050534 | -0.51181  | -1.03201 | -0.87223 | -1.1629  | -0.47697  | 0.753295 | 0.015602 | -0.37529 | -1.07897 | -0.07043 |
| -0.06912 | -0.40892  | 1.092843 | -0.97408 | 0.117147 | 0.239125 | 0.9111   | -0.33714 | -1.5631  | 1.035197 | 1.041941 | 1.035596 | -0.91288 | -0.72714 | -0.12079 | 0.969844 | -0.4223   | 1.3022   | 0.020287 | -0.14075 | -0.10043  | -0.15639 | -0.18951 | -0.5211  | 0.008987 | 0.254908 |
| -0.30273 | 1.326485  | -0.88387 | 0.23679  | -0.99134 | 0.849085 | 0.2      |          |          |          |          |          |          |          |          |          |           |          |          |          |           |          |          |          |          |          |



## Coefficients

sio251 40f sio251 41f sio251 42f sio251 43f sio251 44f sio251 45f sio251 46f sio251 47f sio251 48f sio251 49f sio251 50f sio251 51f sio251 52 factors  
49.37351 49.37336 49.37344 49.37348 49.37346 49.37346 49.37346 49.37346 49.37346 49.37346 49.37346 49.37346 49.37346  
-67.7165 -67.7162 -67.7162 -67.7162 -67.7162 -67.7162 -67.7162 -67.7162 -67.7162 -67.7162 -67.7162 -67.7162 -67.7162  
-24.7078 -24.7078 -24.7078 -24.7078 -24.7078 -24.7078 -24.7078 -24.7078 -24.7078 -24.7078 -24.7078 -24.7078 -24.7078  
92.40977 92.40952 92.40953 92.40952 92.40954 92.40954 92.40954 92.40954 92.40954 92.40954 92.40954 92.40954 92.40954  
-8.42923 -8.42932 -8.42925 -8.42923 -8.42922 -8.42922 -8.42921 -8.42921 -8.42921 -8.42921 -8.42921 -8.42921 -8.42921  
14.14196 14.14198 14.14195 14.14201 14.14203 14.14203 14.14203 14.14203 14.14203 14.14203 14.14203 14.14203 14.14203  
-7.03487 -7.03478 -7.0347 -7.03467 -7.03467 -7.03467 -7.03467 -7.03467 -7.03467 -7.03467 -7.03467 -7.03467 -7.03467  
23.23531 23.23527 23.23527 23.23527 23.23526 23.23526 23.23527 23.23527 23.23527 23.23527 23.23527 23.23527 23.23527  
-34.5706 -34.5707 -34.5708 -34.5708 -34.5708 -34.5708 -34.5708 -34.5708 -34.5708 -34.5708 -34.5708 -34.5708 -34.5708  
17.98096 17.981 17.98101 17.98101 17.98099 17.98099 17.98099 17.98099 17.98099 17.98099 17.98099 17.98099 17.98099  
-5.07479 -5.07473 -5.07474 -5.07468 -5.0747 -5.0747 -5.0747 -5.0747 -5.0747 -5.0747 -5.0747 -5.0747 -5.0747  
95.69081 95.69082 95.69089 95.69089 95.69093 95.69093 95.69092 95.69092 95.69092 95.69092 95.69092 95.69092 95.69092  
-7.04748 -7.04727 -7.0472 -7.04714 -7.04714 -7.04714 -7.04714 -7.04714 -7.04714 -7.04714 -7.04714 -7.04714 -7.04714  
52.78416 52.78418 52.78416 52.78419 52.78417 52.78416 52.78416 52.78416 52.78416 52.78416 52.78416 52.78416 52.78416  
-4.30057 -4.30069 -4.30066 -4.30057 -4.30056 -4.30056 -4.30055 -4.30055 -4.30055 -4.30055 -4.30055 -4.30055 -4.30055  
32.87058 32.87027 32.87017 32.87009 32.87006 32.87006 32.87006 32.87006 32.87006 32.87006 32.87006 32.87006 32.87006  
1.181604 1.181598 1.181594 1.18159 1.18158 1.18158 1.18158 1.18158 1.18158 1.18158 1.18158 1.18158 1.18158  
10.22795 10.2279 10.22787 10.22783 10.22784 10.22784 10.22785 10.22785 10.22785 10.22785 10.22785 10.22785 10.22785  
33.41033 33.4103 33.4102 33.41021 33.41022 33.41022 33.41022 33.41022 33.41022 33.41022 33.41022 33.41022 33.41022  
25.28105 25.28092 25.28093 25.28098 25.28103 25.28103 25.28102 25.28102 25.28103 25.28103 25.28103 25.28103 25.28103  
19.37173 19.3717 19.37172 19.37172 19.37175 19.37175 19.37175 19.37175 19.37175 19.37175 19.37175 19.37175 19.37175  
7.386409 7.386547 7.386553 7.386532 7.386494 7.386494 7.386493 7.386493 7.386493 7.386493 7.386493 7.386493 7.386493  
-7.92841 -7.92869 -7.92869 -7.92869 -7.92869 -7.92869 -7.92869 -7.92869 -7.92869 -7.92869 -7.92869 -7.92869 -7.92869  
-14.568 -14.5682 -14.5681 -14.5681 -14.5681 -14.5681 -14.5681 -14.5681 -14.5681 -14.5681 -14.5681 -14.5681 -14.5681  
-13.9734 -13.9733 -13.9733 -13.9732 -13.9732 -13.9732 -13.9732 -13.9732 -13.9732 -13.9732 -13.9732 -13.9732 -13.9732  
-10.4838 -10.4838 -10.4838 -10.4839 -10.4839 -10.4839 -10.4839 -10.4839 -10.4839 -10.4839 -10.4839 -10.4839 -10.4839  
83.63575 83.63572 83.63572 83.63573 83.63575 83.63575 83.63576 83.63576 83.63576 83.63576 83.63576 83.63576 83.63576  
-25.0993 -25.0993 -25.0993 -25.0992 -25.0993 -25.0993 -25.0993 -25.0993 -25.0993 -25.0993 -25.0993 -25.0993 -25.0993  
-9.43276 -9.43257 -9.43251 -9.43249 -9.43247 -9.43246 -9.43246 -9.43246 -9.43246 -9.43246 -9.43246 -9.43246 -9.43246  
45.82188 45.82197 45.82193 45.82191 45.82184 45.82184 45.82184 45.82184 45.82184 45.82184 45.82184 45.82184 45.82184  
9.076939 9.077242 9.077335 9.077375 9.077399 9.077401 9.077402 9.077402 9.077402 9.077402 9.077402 9.077402 9.077402  
53.51192 53.512 53.51213 53.51219 53.51222 53.51223 53.51223 53.51223 53.51223 53.51223 53.51223 53.51223 53.51223  
2.468792 2.468862 2.468797 2.46877 2.468795 2.468797 2.468797 2.468797 2.468797 2.468797 2.468797 2.468797 2.468797  
62.69227 62.69217 62.69205 62.69198 62.69196 62.69196 62.69199 62.69199 62.69199 62.69199 62.69199 62.69199 62.69199  
-19.0286 -19.0287 -19.0287 -19.0288 -19.0288 -19.0288 -19.0288 -19.0288 -19.0288 -19.0288 -19.0288 -19.0288 -19.0288  
-63.4609 -63.461 -63.4609 -63.4609 -63.4609 -63.4609 -63.4609 -63.4609 -63.4609 -63.4609 -63.4609 -63.4609 -63.4609  
-8.23248 -8.23241 -8.23241 -8.23239 -8.23236 -8.23236 -8.23236 -8.23236 -8.23236 -8.23236 -8.23236 -8.23236 -8.23236  
35.8207 35.82068 35.82065 35.8206 35.8206 35.82061 35.82061 35.82061 35.82061 35.82061 35.82061 35.82061 35.82061  
77.68943 77.68917 77.68915 77.68914 77.68915 77.68915 77.68915 77.68915 77.68915 77.68915 77.68915 77.68915 77.68915  
-64.6215 -64.6217 -64.6216 -64.6216 -64.6215 -64.6216 -64.6216 -64.6216 -64.6216 -64.6216 -64.6216 -64.6216 -64.6216  
-20.5834 -20.5834 -20.5833 -20.5833 -20.5833 -20.5833 -20.5833 -20.5833 -20.5833 -20.5833 -20.5833 -20.5833 -20.5833  
5.410034 5.410319 5.410413 5.410416 5.410409 5.410406 5.410405 5.410404 5.410404 5.410404 5.410404 5.410404 5.410404  
51.24317 51.24289 51.24288 51.2429 51.24291 51.24291 51.24291 51.24291 51.24291 51.24291 51.24291 51.24291 51.24291  
-22.5594 -22.5595 -22.5594 -22.5594 -22.5594 -22.5594 -22.5594 -22.5594 -22.5594 -22.5594 -22.5594 -22.5594 -22.5594  
51.71775 51.7176 51.71764 51.71763 51.71761 51.71761 51.71761 51.71761 51.71761 51.71761 51.71761 51.71761 51.71761  
-1.17208 -1.17212 -1.17212 -1.17214 -1.17214 -1.17215 -1.17215 -1.17215 -1.17215 -1.17215 -1.17215 -1.17215 -1.17215  
47.79914 47.79931 47.79941 47.79947 47.79949 47.79949 47.79949 47.79949 47.79949 47.79949 47.79949 47.79949 47.79949  
-23.2875 -23.2876 -23.2875 -23.2874 -23.2874 -23.2874 -23.2874 -23.2874 -23.2874 -23.2874 -23.2874 -23.2874 -23.2874  
12.5052 -12.5051 -12.5051 -12.5051 -12.5051 -12.5051 -12.5051 -12.5051 -12.5051 -12.5051 -12.5051 -12.5051 -12.5051  
47.89103 47.89102 47.89106 47.8911 47.89108 47.89107 47.89107 47.89107 47.89107 47.89107 47.89107 47.89107 47.89107  
7.041318 7.041598 7.041665 7.041622 7.041628 7.041632 7.041631 7.041631 7.041632 7.041631 7.041631 7.041631 7.041631  
0.820707 0.820544 0.820468 0.820438 0.820394 0.820387 0.820385 0.820384 0.820384 0.820384 0.820384 0.820384 0.820384  
-21.9948 -21.9948 -21.9949 -21.9949 -21.9949 -21.9949 -21.9949 -21.9949 -21.9949 -21.9949 -21.9949 -21.9949 -21.9949  
52.56427 52.5648 52.56499 52.56505 52.56506 52.56506 52.56506 52.56506 52.56506 52.56506 52.56506 52.56506 52.56506  
-27.1674 -27.1673 -27.1674 -27.1674 -27.1674 -27.1674 -27.1674 -27.1674 -27.1674 -27.1674 -27.1674 -27.1674 -27.1674  
24.03676 24.03711 24.03711 24.03719 24.03721 24.03721 24.03721 24.03721 24.03721 24.03721 24.03721 24.03721 24.03721  
-42.66 -42.66 -42.66 -42.66 -42.6601 -42.6601 -42.6601 -42.6601 -42.6601 -42.6601 -42.6601 -42.6601 -42.6601  
-56.8485 -56.8482 -56.8481 -56.848 -56.848 -56.848 -56.848 -56.848 -56.848 -56.848 -56.848 -56.848 -56.848  
127.0594 127.0595 127.0595 127.0594 127.0594 127.0594 127.0594 127.0594 127.0594 127.0594 127.0594 127.0594 127.0594  
43.97573 43.97565 43.97564 43.97567 43.97568 43.97568 43.97568 43.97568 43.97568 43.97568 43.97568 43.97568 43.97568  
-31.1854 -31.1854 -31.1855 -31.1855 -31.1855 -31.1855 -31.1855 -31.1855 -31.1855 -31.1855 -31.1855 -31.1855 -31.1855  
20.94377 20.94375 20.94378 20.94381 20.94381 20.94381 20.94381 20.94381 20.94381 20.94381 20.94381 20.94381 20.94381  
-67.6526 -67.653 -67.6531 -67.6532 -67.6532 -67.6532 -67.6532 -67.6532 -67.6532 -67.6532 -67.6532 -67.6532 -67.6532  
-15.9532 -15.9536 -15.9535 -15.9535 -15.9535 -15.9535 -15.9535 -15.9535 -15.9535 -15.9535 -15.9535 -15.9535 -15.9535  
-6.49279 -6.49269 -6.49274 -6.49276 -6.49278 -6.49278 -6.49278 -6.49278 -6.49278 -6.49278 -6.49278 -6.49278 -6.49278  
-29.13683 21.03679 21.03681 21.03681 21.03689 21.03689 21.03689 21.03689 21.03689 21.03689 21.03689 21.03689 21.03689  
28.92508 28.92507 28.92506 28.92515 28.9252 28.9252 28.9252 28.9252 28.9252 28.9252 28.9252 28.9252 28.9252  
111.5445 111.5443 111.5442 111.5442 111.5442 111.5442 111.5442 111.5442 111.5442 111.5442 111.5442 111.5442 111.5442  
91.28538 91.2855 91.2856 91.28568 91.28568 91.28568 91.28567 91.28567 91.28567 91.28567 91.28567 91.28567 91.28567  
-7.54112 -7.54075 -7.54074 -7.54074 -7.54073 -7.54074 -7.54074 -7.54074 -7.54074 -7.54074 -7.54074 -7.54074 -7.54074  
-35.994 -35.9942 -35.9942 -35.9942 -35.9942 -35.9942 -35.9942 -35.9942 -35.9942 -35.9942 -35.9942 -35.9942 -35.9942  
-57.8324 -57.8321 -57.8319 -57.8319 -57.8319 -57.8319 -57.8319 -57.8319 -57.8319 -57.8319 -57.8319 -57.8319 -57.8319  
-5.28596 -5.28608 -5.28612 -5.28614 -5.28614 -5.28615 -5.28615 -5.28615 -5.28615 -5.28615 -5.28615 -5.28615 -5.28615  
46.86801 46.86824 46.86825 46.86829 46.86832 46.86832 46.86833 46.86833 46.86833 46.86833 46.86833 46.86833 46.86833  
38.03453 38.03441 38.0344 38.03443 38.03441 38.03442 38.03442 38.03442 38.03442 38.03442 38.03442 38.03442 38.03442  
35.92136 35.92105 35.92095 35.92091 35.92091 35.92091 35.92091 35.92091 35.92091 35.92091 35.92091 35.92091 35.92091  
20.75638 20.75623 20.75607 20.75597 20.75597 20.75597 20.7559 20.7559 20.7559 20.7559 20.7559 20.7559 20.7559  
-8.76509 -8.76512 -8.76511 -8.76511 -8.76507 -8.76508 -8.76507 -8.76507 -8.76507 -8.76507 -8.76507 -8.76507 -8.76507  
33.04539 33.04537 33.04532 33.04532 33.04536 33.04536 33.04536 33.04536 33.04536 33.04536 33.04536 33.04536 33.04536  
74.18181 74.18196 74.18187 74.18182 74.18179 74.18179 74.18179 74.18179 74.18179 74.18179 74.18179 74.18179 74.18179  
-49.5993 -49.5992 -49.5992 -49.5992 -49.5992 -49.5992 -49.5992 -49.5992 -49.5992 -49.5992 -49.5992 -49.5992 -49.5992  
-32.7691 -32.7693 -32.7694 -32.7694 -32.7694 -32.7694 -32.7694 -32.7694 -32.7694 -32.7694 -32.7694 -32.7694 -32.7694  
-28.902 -28.9017 -28.9016 -28.9016 -28.9016 -28.9016 -28.9016 -28.9016 -28.9016 -28.9016 -28.9016 -28.9016 -28.9016  
18.62327 18.62326 18.62324 18.62318 18.62314 18.62314 18.62314 18.62314 18.62314 18.62314 18.62314 18.62314 18.62314  
-53.369 -53.3688 -53.3688 -53.3687 -53.3687 -53.3687 -53.3687 -53.3687 -53.3687 -53.3687 -53.3687 -53.3687 -53.3687  
22.58714 22.58688 22.58687 22.58683 22.58679 22.58679 22.58679 22.58679 22.58679 22.58679 22.58679 22.58679 22.58679  
41.91169 41.91153 41.91153 41.91155 41.91157 41.91157 41.91157 41.91157 41.91157 41.91157 41.91157 41.91157 41.91157  
17.58295 17.58291 17.58306 17.58309 17.58309 17.58309 17.58309 17.58309 17.58309 17.58309 17.58309 17.58309 17.58309  
50.71834 50.71824 50.71814 50.71808 50.71805 50.71805 50.71805 50.71805 50.71805 50.71805 50.71805 50.71805 50.71805  
333.1038 333.1038 333.1038 333.1038 333.1037 333.1037 333.1037 333.1037 333.1037 333.1037 333.1037 333.1037 333.1037  
167.4963 167.4964 167.4965 167.4966 167.4966 167.4967 167.4967 167.4967 167.4967 167.4967 167.4967 167.4967 167.4967  
72.45911 72.45913 72.45921 72.45925 72.45927 72.45928 72.45928 72.45928 72.45928 72.45928 72.45928 72.45928 72.45928  
-6.76188 -6.76205 -6.7622 -6.76226 -6.76227 -6.76227 -6.76228 -6.76228 -6.76228 -6.76228 -6.76228 -6.76228 -6.76228  
-27.7127 -27.7125 -27.7125 -27.7124 -27.7125 -27.7125 -27.7125 -27.7125 -27.7125 -27.7125 -27.7125 -27.7125 -27.7125  
6.456926 6.457032 6.457038 6.457074 6.457113 6.457113 6.457113 6.457112 6.457112 6.457112 6.457112 6.457112 6.457112  
-4.40758 -4.4073 -4.40713 -4.40705 -4.40701 -4.40701 -4.40702 -4.40701 -4.40701 -4.40701 -4.40701 -4.40701 -4.40701  
73.71473 73.7149 73.71495 73.71492 73.71491 73.7149 73.7149 73.7149 73.7149 73.7149 73.7149 73.7149 73.7149  
-46.8373 -46.8374 -46.8375 -46.8375 -46.8375 -46.8375 -46.8375 -46.8375 -46.8375 -46.8375 -46.8375 -46.8375 -46.8375  
17.34275 17.34275 17.34275 17.34276 17.34276 17.34276 17.34275 17.34275 17.34275 17.34275 17.34275 17.34275 17.34275  
28.87567 28.87577 28.87568 28.87563 28.87568 28.87567 28.87568 28.87567 28.87567 28.87567 28.87567 28.87567 28.87567  
-25.2972 -25.2974 -25.2975 -25.2975 -25.2975 -25.2975 -25.2975 -25.2975 -25.2975 -25.2975 -25.2975 -25.2975 -25.2975  
19.61036 19.61044 19.6103 19.61035 19.6104 19.6104 19.6104 19.6104 19.6104 19.6104 19.6104 19.6104 19.6104  
-26.929 -26.9292 -26.9292 -26.9292 -26.9292 -26.9292 -26.9292 -26.9292 -26.9292 -26.9292 -26.9292 -26.9292 -26.9292  
25.87281 25.87297 25.87311 25.87323 25.87323 25.87323 25.87323 25.87323 25.87323 25.87323 25.87323 25.87323 25.87323  
-3.36161 -3.36136 -3.36131 -3.36123 -3.36123 -3.36123 -3.36123 -3.36123 -3.36123 -3.36123 -3.36123 -3.36123 -3.36123  
-5.9992 -5.99906 -5.99909 -5.99912 -5.99911 -5.9991 -5.9991 -5.9991 -5.9991 -5.9991 -5.9991 -5.9991 -5.9991  
-36.7936 -36.7939 -36.7939 -36.7939 -36.7939 -36.7939 -36.7939 -36.7939 -36.7939 -36.7939 -36.7939 -36.7939 -36.7939  
-5.50306 -5.50299 -5.50306 -5.50303 -5.50307 -5.50308 -5.50307 -5.50307 -5.50307 -5.50307 -5.50307 -5.50307 -5.50307  
47.66826 47.66848 47.6685 47.66844 47.66843 47.66843 47.66843 47.66843 47.66843 47.66843 47.66843 47.66843 47.66843

[illegible]

|           |           |           |           |          |           |           |          |           |          |          |          |          |
|-----------|-----------|-----------|-----------|----------|-----------|-----------|----------|-----------|----------|----------|----------|----------|
| Factor40  | Factor41  | Factor42  | Factor43  | Factor44 | Factor45  | Factor46  | Factor47 | Factor48  | Factor49 | Factor50 | Factor51 | Factor52 |
| -0.00435  | -0.09821  | 0.190757  | 0.008772  | -0.09829 | -0.04272  | -0.11918  | -0.06939 | 0.025571  | 0.296159 | 0.202359 | 0.01168  | -0.0268  |
| 0.093137  | 0.033909  | -0.03255  | -0.13138  | 0.008727 | 0.004727  | -0.09892  | 0.133445 | -0.002    | 0.04425  | -0.02362 | 0.010067 | 0.075996 |
| 0.075906  | -0.03001  | 0.065864  | -0.10229  | -0.1694  | -0.13185  | -0.05728  | 0.015703 | 0.093031  | 0.077102 | 0.121309 | -0.10106 | -0.1206  |
| -0.06546  | -0.13692  | 0.118719  | -0.05081  | 0.080789 | 0.093148  | -0.04568  | 0.055261 | -0.03698  | 0.060425 | -0.0643  | 0.014384 | -0.05236 |
| -0.04882  | -0.10071  | 0.142353  | -0.00896  | 0.023811 | 0.018328  | 0.049825  | 0.001516 | -0.00598  | -0.21872 | 0.138198 | 0.05214  | 0.00481  |
| -0.0148   | 2.22E-05  | 0.022787  | 0.01672   | 0.088273 | 0.053004  | -0.06755  | -0.03475 | 0.130049  | 0.145786 | 0.03081  | 0.140775 | -0.01102 |
| -0.05417  | 0.110636  | 0.088664  | 0.001969  | -0.0154  | 0.031979  | 0.012159  | -0.14218 | -0.05044  | -0.07021 | 0.058483 | -0.20072 | -0.13503 |
| -0.18085  | 0.115304  | 0.016757  | -0.03084  | 0.000283 | 0.19227   | 0.046897  | 0.056392 | -0.12723  | 0.011121 | -0.02011 | 0.058201 | -0.11928 |
| -0.06113  | -0.00197  | -0.04963  | -0.02387  | 0.022504 | -0.0775   | 0.018701  | 0.029761 | 0.134087  | 0.062145 | 0.103362 | -0.00726 | 0.079794 |
| -0.04318  | -0.00376  | -0.00978  | 0.014072  | -0.09063 | -0.06475  | -0.11445  | -0.06232 | -0.10223  | -0.01132 | -0.06565 | 0.017902 | -0.07398 |
| -0.0468   | 0.062847  | -0.02487  | 0.155749  | -0.14078 | 0.091577  | -0.04404  | 0.004895 | 0.102592  | -0.08299 | 0.111086 | 0.05356  | 0.045642 |
| -0.02667  | 0.030269  | 0.100660  | -0.064514 | 0.154309 | -0.08714  | -0.06205  | -0.07283 | -0.22374  | -0.07913 | 0.009801 | -0.05071 | 0.033834 |
| 0.105824  | 0.097797  | 0.0408    | 0.110462  | -0.11669 | 0.079443  | -0.09263  | -0.02013 | 0.107682  | -0.05588 | -0.06653 | -0.09104 | -0.01088 |
| -0.03618  | -0.02321  | -0.00459  | 0.023041  | -0.08781 | -0.12554  | -0.08646  | 0.02074  | 0.018222  | -0.05847 | 0.176159 | -0.04568 | -0.05057 |
| -0.06331  | -0.01443  | 0.097339  | 0.220772  | -0.05324 | -0.05921  | 0.210059  | 0.198084 | -0.05877  | -0.0412  | 0.049472 | -0.07709 | -0.00243 |
| -0.19859  | -0.06092  | -0.05738  | -0.11598  | -0.03839 | -0.04116  | 0.121432  | -0.04372 | 0.024593  | -0.03933 | 0.14325  | 0.119839 | 0.014634 |
| 0.1986    | -0.08974  | 0.03919   | 0.07843   | 0.00139  | -0.03098  | -0.07247  | -0.05303 | 0.092015  | -0.01224 | 0.078135 | -0.17034 | -0.08366 |
| -0.03874  | -0.05453  | -0.02326  | -0.09119  | 0.112732 | 0.031728  | 0.127898  | -0.05717 | -0.07503  | 0.030574 | 0.061229 | -0.08173 | 0.064626 |
| 0.064373  | -0.08329  | -0.15265  | 0.139159  | 0.047942 | -0.01946  | -0.09665  | -0.03092 | -0.01942  | 0.040697 | -0.05547 | -0.08282 | -0.03289 |
| -0.00868  | -0.1019   | 0.067849  | 0.140913  | 0.120504 | -0.10102  | -0.03139  | 0.089954 | 0.075425  | -0.00901 | -0.09238 | 0.001846 | 0.041672 |
| -0.0831   | -0.02476  | 0.039881  | -0.0312   | 0.130687 | 0.019004  | -0.04424  | -0.10801 | -0.00887  | 0.105352 | -0.04062 | -0.08067 | 0.016672 |
| 0.067897  | 0.017258  | -0.11771  | 0.120686  | -0.20493 | 0.02379   | -0.01905  | 0.026871 | -0.06365  | 0.095626 | 0.020326 | 0.02639  | 0.01054  |
| -0.2007   | -0.06391  | 0.10689   | 7.89E-05  | -0.02702 | 0.121464  | -0.09421  | -0.09103 | -0.04486  | -0.0363  | -0.12804 | -0.00093 | 0.040292 |
| 0.797999  | -0.09735  | 0.089916  | -0.06961  | 0.009622 | 0.050892  | 0.051379  | -0.09436 | -0.06226  | 0.096289 | -0.17863 | 0.058823 | -0.14224 |
| 0.232691  | -0.05456  | -0.00491  | 0.056933  | -0.04291 | 0.082349  | 0.01755   | 0.097771 | -0.11962  | 0.047542 | -0.06887 | -0.06131 | 0.024744 |
| 0.122755  | -0.07114  | -0.07713  | -0.00335  | -0.0646  | 0.028911  | -0.01608  | 0.06187  | -0.09318  | -0.05306 | -0.15145 | 0.102737 | 0.075755 |
| 0.01611   | -0.10596  | 0.006707  | 0.0218    | 0.086102 | 0.084791  | 0.094572  | -0.02555 | -0.09299  | 0.138458 | 0.141083 | 0.023361 | 0.188161 |
| 0.0194    | -0.02634  | 0.029609  | -0.00854  | -0.10809 | 0.03264   | 0.00912   | 0.024743 | 0.016291  | -0.03708 | -0.11309 | 0.110415 | 0.01145  |
| 0.224437  | 0.034611  | 0.01377   | 0.011115  | 0.049677 | 0.085515  | -0.00478  | -0.00082 | 0.060664  | 0.067177 | -0.02492 | -0.13059 | -0.01417 |
| 0.031971  | -0.00172  | -0.08518  | -0.04595  | -0.23761 | 0.024437  | -0.03272  | -0.06259 | 0.001604  | 0.080396 | 0.051206 | -0.00057 | -0.01505 |
| 0.093498  | 0.065487  | 0.033182  | 0.027096  | 0.039908 | 0.019815  | 0.035528  | -0.02384 | -0.00755  | -0.0513  | 0.102378 | -0.03944 | 0.049061 |
| 0.016471  | 0.099     | 0.171459  | 0.070378  | 0.02341  | 0.072457  | 0.045732  | -0.14009 | 0.168779  | -0.02539 | -0.13665 | -0.01208 | 0.098753 |
| -0.185012 | -0.00242  | 0.131494  | 0.14949   | -0.01227 | 0.069004  | -0.052707 | -0.0237  | -0.062707 | -0.08764 | -0.19408 | 0.00904  | 0.01192  |
| -0.06605  | -0.04724  | -0.14866  | -0.04528  | 0.048886 | 0.016188  | 0.131872  | -0.04555 | 1.70E-01  | 0.105652 | -0.03615 | -0.01747 | 0.087796 |
| -0.01356  | -0.07853  | -0.05122  | -0.13411  | 0.02025  | -0.02732  | -0.05588  | -0.14945 | 0.049343  | 0.121035 | 0.014598 | 0.020292 | 0.004521 |
| 0.067097  | 0.012432  | 0.137646  | -0.01166  | -0.01802 | -0.16586  | -0.08811  | 0.103328 | -0.02274  | -0.10637 | 0.084685 | -0.0687  | 0.102691 |
| -0.0339   | 0.089516  | -0.01247  | 0.045213  | 0.100045 | -0.128    | -0.1112   | 0.13019  | 0.137835  | -0.11916 | -0.06058 | -0.04588 | 0.004023 |
| -0.04007  | 0.031272  | -0.03329  | -0.11573  | 0.094591 | 0.054155  | -0.02946  | 0.10357  | -0.03241  | 0.120713 | 0.024431 | -0.04122 | -0.12797 |
| -0.17379  | -0.02537  | 0.005052  | -0.098216 | -0.01057 | 0.032126  | 0.032184  | 0.032184 | 0.044848  | 0.081869 | 0.091111 | -0.20169 | 0.043683 |
| -0.07394  | -0.06207  | 0.169401  | 0.014538  | 0.03481  | -0.23575  | 0.012815  | 0.076725 | 0.038897  | 0.047475 | -0.13258 | -0.15886 | -0.11846 |
| -0.05379  | 0.032798  | 0.049559  | 0.062102  | -0.02909 | -0.00257  | -0.12749  | -0.21395 | -0.04261  | 0.127121 | -0.18074 | -0.12081 | 0.107383 |
| 0.023907  | 0.167165  | 0.041363  | -0.08585  | -0.03404 | -0.05466  | -0.06818  | 0.022167 | 0.022207  | -0.12252 | 0.023758 | -0.1442  | 0.107965 |
| -0.22088  | -0.06623  | 0.088689  | 0.086997  | -0.01752 | 0.006594  | 0.156515  | 0.114959 | 0.020676  | -0.07101 | -0.06626 | 0.130082 | 0.013396 |
| 0.216131  | -0.029568 | 0.153132  | -0.02965  | -0.0312  | -0.09425  | 0.070235  | 0.138378 | 0.017561  | 0.104016 | -0.02076 | 0.021494 | -0.08336 |
| 0.026376  | -0.10905  | 0.116762  | -0.06486  | -0.05561 | -0.00739  | 0.034346  | -0.08776 | 0.118199  | 0.047987 | -0.16167 | -0.03059 | -0.00818 |
| -0.0685   | 0.056165  | 0.025543  | -0.07141  | 0.015586 | -0.10206  | 0.107666  | 0.025716 | 0.143858  | 0.035076 | 0.215286 | -0.12041 | -0.02536 |
| 0.057967  | 0.032784  | 0.103631  | 0.060845  | 0.012221 | -0.04243  | 0.033606  | -0.10096 | -0.04349  | -0.02562 | 0.046834 | -0.12277 | 0.032789 |
| 0.073869  | -0.02442  | 0.17057   | 0.080114  | 0.076017 | -0.11937  | 0.087643  | 0.000301 | 0.001137  | 0.089156 | -0.12123 | 0.014928 | -0.01235 |
| 0.160736  | 0.01398   | -0.0192   | -0.11194  | 0.029037 | 0.224832  | -0.00847  | -0.07572 | -0.04945  | -0.00164 | 0.105512 | 0.041364 | -0.00263 |
| 0.07678   | 0.044742  | -0.1487   | -0.08303  | -0.04253 | -0.10103  | 0.072894  | -0.06544 | -0.0395   | -0.10679 | -0.08076 | -0.08602 | -0.0617  |
| 0.099157  | 0.127046  | 0.001622  | -0.19459  | 0.092763 | 0.056291  | -0.03584  | 0.033574 | 0.12438   | -0.13623 | -0.15439 | 0.068785 | 0.038385 |
| -0.05613  | -0.10403  | -0.05904  | -0.01073  | -0.1427  | -0.11074  | -0.07885  | -0.24373 | -0.1009   | -0.00878 | 0.008593 | 0.003171 | 0.048332 |
| 0.049879  | -0.03399  | -0.06155  | -0.00497  | 0.040133 | -0.01335  | -0.02733  | 0.034982 | 0.045731  | 0.110542 | -0.0145  | 0.03053  | -0.02161 |
| 0.002558  | 0.030746  | 0.010178  | -0.01817  | -0.03395 | -0.00627  | 0.11386   | -0.01956 | 0.074978  | 0.010916 | -0.11813 | 0.125087 | 0.085407 |
| -0.11133  | 0.048817  | -0.121947 | -0.00084  | -0.13474 | -0.01308  | -0.10524  | 0.023145 | -0.05218  | 0.102344 | -0.10841 | 0.174696 | 0.016228 |
| -0.04219  | 0.160795  | -0.03864  | -0.00885  | 0.058666 | -0.0573   | 0.009629  | -0.0265  | 0.065941  | -0.08929 | -0.07162 | -0.03366 | -0.02188 |
| -0.07048  | 0.003006  | 0.052545  | -0.16632  | 6.42E-05 | 0.07186   | 0.060314  | 0.103186 | -0.14503  | 0.046776 | -0.0171  | 0.064487 | 0.109428 |
| 0.023582  | 0.181998  | 0.103907  | -0.09293  | 0.169579 | 0.109102  | 0.087775  | 0.211009 | 0.078684  | 0.069303 | 0.078546 | 0.066144 | -0.01615 |
| -0.06657  | 0.16333   | -0.05442  | -0.13123  | -0.04906 | -0.08527  | 0.07391   | 0.123076 | -0.16537  | 0.018484 | -0.07032 | -0.03881 | -0.01806 |
| 0.082308  | -0.11596  | 0.024637  | 0.092576  | -0.01085 | -0.08621  | 0.211122  | 0.067957 | 0.047871  | -0.02342 | -0.16231 | -0.03353 | 0.228737 |
| -0.05401  | 0.082676  | -0.12424  | -0.05647  | -0.05467 | -0.047965 | -0.04395  | -0.13333 | 0.020635  | 0.005728 | -0.12001 | 0.005728 | -0.12015 |
| 0.024027  | 0.002638  | 0.066717  | 0.037929  | -0.01771 | 0.015033  | -0.04322  | -0.09022 | 0.064     | 0.042996 | 0.085366 | 0.093594 | -0.14286 |
| -0.1017   | -0.18525  | 0.034998  | -0.05965  | -0.0673  | -0.12839  | -0.0351   | 0.041606 | -0.06779  | 0.04135  | -0.0169  | -0.03198 | -0.00862 |
| 0.004483  | -0.27064  | 0.125759  | 0.119377  | -0.09241 | 0.077169  | -0.07747  | 0.047818 | 0.0182151 | -0.06914 | -0.02702 | 0.002353 | -0.0571  |
| -0.01596  | 0.04656   | -0.11658  | -0.00784  | -0.08319 | 0.171449  | -0.00299  | 0.097246 | 0.105026  | -0.01952 | 0.113429 | -0.0246  | 0.082726 |
| 0.02074   | 0.0243891 | -0.076057 | -0.012081 | -0.04037 | -0.13692  | 0.063401  | -0.00262 | 0.036391  | -0.02385 | 0.173816 | -0.02948 | 0.160303 |
| 0.137729  | -0.01212  | -0.0091   | 0.281705  | 0.088871 | -0.14052  | 0.046448  | -0.11257 | -0.01398  | -0.10579 | 0.089279 | 0.08674  | -0.05825 |
| 0.039617  | -0.10255  | -0.05855  | -0.03865  | -0.00783 | 0.054798  | -0.02669  | 0.304682 | 0.060137  | -0.01327 | -0.15334 | 0.110431 | 0.056267 |
| 0.05923   | -0.03149  | 0.10632   | 0.124296  | -0.1067  | 0.005691  | -0.16165  | -0.07261 | -0.01586  | -0.09674 | -0.00364 | 0.137304 | -0.1453  |
| 0.150981  | 0.179237  | -0.11446  | -0.01367  | 0.040592 | -0.17951  | -0.05197  | 0.001992 | -0.07476  | -0.12244 | -0.17829 | -0.13617 | -0.06477 |
| 0.069917  | -0.0337   | 0.01727   | 0.107626  | 0.008024 | 0.017374  | -0.070281 | -0.19125 | 0.036007  | -0.06584 | 0.09569  | -0.05416 | -0.0534  |
| -0.05364  | 0.180078  | 0.130442  | -0.03079  | -0.00213 | 0.02898   | 0.126309  | -0.07931 | -0.00385  | -0.05828 | 0.099008 | -0.00165 | -0.02149 |
| -0.03219  | -0.03655  | -0.01356  | -0.01522  | -0.00285 | -0.01019  | -0.04194  | -0.02836 | 0.096124  | -0.01394 | 0.15832  | 0.131248 | 0.150861 |
| 0.04554   | 0.051305  | -0.07514  | 0.108944  | 0.092344 | 0.107559  | 0.089074  | 0.113357 | -0.01418  | -0.079   | 0.086662 | -0.01463 | -0.09184 |
| 0.01576   | -0.05854  | 0.038816  | 0.        |          |           |           |          |           |          |          |          |          |
