# Supplementary material for: Identification of Salty Dietary Patterns of the Japanese Macroregion
Source: Hindawi journal article supplement (doi:10.1155/2021/6675418), 2021-07-22
Supplement: f1 [file 6675418.f1.zip]

(品目分類) 第11表 都市階級・地方・都道府県庁所在市別 1世帯当たり年間の品目別支出金額、購入数量(二人以上の世帯)  
(Commodity Classification) Table 11. Yearly Amount of Expenditures and Quantities per Household by City Group, District and City with Prefectural Government (Two-or-more-person Households)

| 都 市 階 級                                                        |  |                                  |                                    |                                                  |                                                  |                                             |                 |                                        |                            |                                  |                                              |                                          |                                |                                     |                                  |                                    |                                |                                     |                               |                             |                               |                             |                               |                            |                                |                                 |                                 |                              |           |
|----------------------------------------------------------------|--|----------------------------------|------------------------------------|--------------------------------------------------|--------------------------------------------------|---------------------------------------------|-----------------|----------------------------------------|----------------------------|----------------------------------|----------------------------------------------|------------------------------------------|--------------------------------|-------------------------------------|----------------------------------|------------------------------------|--------------------------------|-------------------------------------|-------------------------------|-----------------------------|-------------------------------|-----------------------------|-------------------------------|----------------------------|--------------------------------|---------------------------------|---------------------------------|------------------------------|-----------|
| 都 道 府 県 庁 所 在 市                                                |  | 世帯数<br>分 布<br>(抽 出 率<br>調 整)     | 集 計<br>世 帯 数                       | 世帯人員<br>(人)                                      | 有業人員<br>(人)                                      | 世帯主の<br>年 齢<br>(歳)                          | 102～981<br>消費支出 | 102～399-<br>39A・39B・<br>39X・39Y<br>食 料 | 米                          | 1<br>食                           | 2<br>パン                                      | 3<br>生うどん・生                              | 4<br>乾うどん・生                    | 5<br>スパゲッティ                         | 6<br>中 華 麵                       | 7<br>小 麦 粉                         | 8<br>も ち                       | 9<br>ま ぐ ろ                          | 10<br>あ じ                     | 11<br>い わ し                 | 12<br>か つ お                   | 13<br>か れ い                 | 14<br>さ け                     | 15<br>さ ば                  | 16<br>さんま                      | 17<br>た い                       | 18<br>ぶ り                       | 19<br>い か                    | 20<br>た こ |
| City group<br>District<br><br>City with prefectural government |  | Distribution<br>of<br>households | Num. of<br>tabulated<br>households | Num. of<br>persons per<br>household<br>(persons) | Num. of<br>earners per<br>household<br>(persons) | Age of<br>household<br>heads<br>(years old) | 金額<br>Exp.      | 金額<br>Exp.                             | Rice<br>1kg<br>数量<br>Quan. | White bread<br>1g<br>数量<br>Quan. | Non-dried<br>"Udon"&"S"<br>1g<br>数量<br>Quan. | Dried<br>"Udon"&"S"<br>1g<br>数量<br>Quan. | Spaghetti<br>1g<br>数量<br>Quan. | Chinese noodle<br>1g<br>数量<br>Quan. | Wheat flour<br>1g<br>数量<br>Quan. | "Mochi", rice<br>1g<br>数量<br>Quan. | Tuna fish<br>1g<br>数量<br>Quan. | Horse mackerel<br>1g<br>数量<br>Quan. | Sardines<br>1g<br>数量<br>Quan. | Bonito<br>1g<br>数量<br>Quan. | Flounder<br>1g<br>数量<br>Quan. | Salmon<br>1g<br>数量<br>Quan. | Mackerel<br>1g<br>数量<br>Quan. | Saury<br>1g<br>数量<br>Quan. | Sea bream<br>1g<br>数量<br>Quan. | Yellowtail<br>1g<br>数量<br>Quan. | Cuttlefish<br>1g<br>数量<br>Quan. | Octopus<br>1g<br>数量<br>Quan. |           |
| 全 国                                                            |  | 10,000                           | 7,638                              | 2.98                                             | 1.35                                             | 59.3                                        | 3,447,782       | 952,170                                | 65.75                      | 19,724                           | 10,035                                       | 3,552                                    | 2,936                          | 8,562                               | 2,376                            | 2,250                              | 1,929                          | 932                                 | 642                           | 815                         | 713                           | 2,507                       | 966                           | 1,135                      | 423                            | 1,617                           | 1,154                           | 539                          |           |
| 札幌市                                                            |  | 157                              | 94                                 | 2.99                                             | 1.28                                             | 58.2                                        | 3,372,653       | 893,082                                | 86.31                      | 17,540                           | 8,367                                        | 3,690                                    | 3,966                          | 8,598                               | 2,472                            | 2,491                              | 1,937                          | 190                                 | 425                           | 440                         | 2,212                         | 3,894                       | 978                           | 2,334                      | 165                            | 613                             | 1,601                           | 1,038                        |           |
| 青森市                                                            |  | 23                               | 94                                 | 3.01                                             | 1.33                                             | 60.1                                        | 3,017,508       | 890,844                                | 81.76                      | 17,404                           | 7,211                                        | 3,486                                    | 2,897                          | 8,867                               | 2,037                            | 1,520                              | 2,091                          | 1,053                               | 1,563                         | 575                         | 2,769                         | 4,086                       | 997                           | 2,084                      | 415                            | 1,183                           | 2,658                           | 663                          |           |
| 盛岡市                                                            |  | 23                               | 94                                 | 3.09                                             | 1.45                                             | 58.9                                        | 3,440,518       | 963,319                                | 80.43                      | 17,177                           | 9,640                                        | 6,458                                    | 3,686                          | 11,401                              | 2,240                            | 1,866                              | 2,349                          | 356                                 | 428                           | 1,188                       | 836                           | 3,206                       | 792                           | 3,480                      | 187                            | 1,316                           | 1,109                           | 643                          |           |
| 仙台市                                                            |  | 81                               | 91                                 | 3.02                                             | 1.26                                             | 59.7                                        | 3,295,025       | 941,483                                | 57.90                      | 16,934                           | 8,973                                        | 5,205                                    | 3,017                          | 9,752                               | 2,662                            | 2,803                              | 2,436                          | 406                                 | 474                           | 1,764                       | 1,158                         | 2,527                       | 501                           | 1,829                      | 74                             | 1,144                           | 1,162                           | 598                          |           |
| 秋田市                                                            |  | 25                               | 95                                 | 2.90                                             | 1.22                                             | 59.7                                        | 3,360,697       | 919,370                                | 56.75                      | 14,917                           | 8,965                                        | 4,976                                    | 2,862                          | 9,472                               | 1,431                            | 1,004                              | 2,284                          | 648                                 | 997                           | 910                         | 2,040                         | 2,939                       | 1,024                         | 1,736                      | 450                            | 1,540                           | 1,699                           | 540                          |           |
| 山形市                                                            |  | 19                               | 95                                 | 3.03                                             | 1.55                                             | 57.5                                        | 3,665,659       | 958,712                                | 67.13                      | 13,574                           | 11,280                                       | 5,777                                    | 3,260                          | 9,391                               | 2,034                            | 2,137                              | 2,032                          | 309                                 | 354                           | 1,273                       | 917                           | 2,591                       | 617                           | 1,432                      | 114                            | 1,201                           | 1,437                           | 564                          |           |
| 福島市                                                            |  | 22                               | 92                                 | 2.94                                             | 1.22                                             | 61.5                                        | 3,415,902       | 928,386                                | 65.30                      | 13,173                           | 7,912                                        | 5,327                                    | 2,612                          | 8,773                               | 1,395                            | 1,681                              | 1,987                          | 435                                 | 305                           | 1,273                       | 549                           | 2,247                       | 431                           | 1,244                      | 52                             | 1,060                           | 1,240                           | 303                          |           |
| 水戸市                                                            |  | 22                               | 92                                 | 2.96                                             | 1.33                                             | 57.9                                        | 3,487,427       | 934,098                                | 55.28                      | 17,679                           | 9,268                                        | 3,460                                    | 2,678                          | 8,897                               | 1,787                            | 2,360                              | 2,674                          | 619                                 | 517                           | 1,699                       | 671                           | 3,583                       | 1,214                         | 2,015                      | 244                            | 1,755                           | 1,338                           | 410                          |           |
| 宇都宮市                                                           |  | 42                               | 93                                 | 2.87                                             | 1.19                                             | 59.3                                        | 3,677,284       | 967,570                                | 71.77                      | 18,130                           | 10,053                                       | 3,734                                    | 2,845                          | 8,687                               | 2,147                            | 2,607                              | 2,794                          | 369                                 | 413                           | 751                         | 376                           | 3,078                       | 849                           | 1,273                      | 146                            | 1,293                           | 1,047                           | 381                          |           |
| 前橋市                                                            |  | 27                               | 92                                 | 2.73                                             | 1.21                                             | 60.6                                        | 3,190,481       | 901,904                                | 72.67                      | 13,899                           | 10,983                                       | 2,715                                    | 2,192                          | 8,950                               | 2,331                            | 2,165                              | 2,660                          | 765                                 | 492                           | 618                         | 443                           | 3,747                       | 619                           | 1,180                      | 159                            | 974                             | 1,003                           | 434                          |           |
| さいたま市                                                          |  | 103                              | 91                                 | 3.06                                             | 1.40                                             | 58.7                                        | 3,887,169       | 1,042,064                              | 65.46                      | 19,579                           | 11,180                                       | 2,961                                    | 3,421                          | 9,597                               | 2,329                            | 3,352                              | 2,671                          | 718                                 | 564                           | 627                         | 295                           | 2,687                       | 953                           | 1,061                      | 168                            | 1,356                           | 1,017                           | 390                          |           |
| 千葉市                                                            |  | 81                               | 93                                 | 3.11                                             | 1.22                                             | 60.3                                        | 3,845,361       | 1,078,992                              | 58.56                      | 19,919                           | 9,764                                        | 4,307                                    | 3,454                          | 9,097                               | 2,133                            | 2,600                              | 2,902                          | 825                                 | 770                           | 1,031                       | 596                           | 3,002                       | 796                           | 1,182                      | 146                            | 1,686                           | 963                             | 614                          |           |
| 東京都                                                            |  | 693                              | 355                                | 2.95                                             | 1.42                                             | 59.0                                        | 3,914,749       | 1,117,304                              | 53.93                      | 20,476                           | 7,597                                        | 3,555                                    | 3,550                          | 8,434                               | 1,826                            | 2,735                              | 2,554                          | 813                                 | 471                           | 831                         | 428                           | 2,316                       | 673                           | 976                        | 269                            | 1,421                           | 926                             | 484                          |           |
| 横浜市                                                            |  | 304                              | 127                                | 2.80                                             | 1.10                                             | 61.3                                        | 3,614,844       | 1,036,897                              | 52.87                      | 19,882                           | 9,632                                        | 2,908                                    | 3,238                          | 8,301                               | 2,445                            | 2,487                              | 2,418                          | 1,017                               | 671                           | 616                         | 416                           | 2,680                       | 938                           | 1,236                      | 266                            | 1,586                           | 1,123                           | 524                          |           |
| 新潟市                                                            |  | 60                               | 92                                 | 3.10                                             | 1.49                                             | 59.7                                        | 3,493,899       | 966,479                                | 69.50                      | 19,620                           | 9,091                                        | 7,008                                    | 3,041                          | 8,780                               | 2,090                            | 2,165                              | 1,668                          | 613                                 | 844                           | 820                         | 1,641                         | 3,012                       | 827                           | 1,582                      | 114                            | 2,154                           | 1,569                           | 626                          |           |
| 富山市                                                            |  | 32                               | 94                                 | 3.20                                             | 1.60                                             | 56.7                                        | 3,893,242       | 1,061,144                              | 77.22                      | 22,126                           | 10,599                                       | 4,304                                    | 2,961                          | 8,092                               | 1,454                            | 3,448                              | 2,367                          | 1,273                               | 574                           | 454                         | 779                           | 2,771                       | 934                           | 755                        | 268                            | 4,427                           | 1,964                           | 381                          |           |
| 金沢市                                                            |  | 35                               | 95                                 | 3.30                                             | 1.67                                             | 56.3                                        | 4,070,101       | 1,009,000                              | 54.11                      | 22,849                           | 13,364                                       | 2,779                                    | 2,783                          | 9,882                               | 2,250                            | 2,647                              | 1,275                          | 1,204                               | 721                           | 625                         | 1,165                         | 2,591                       | 843                           | 881                        | 422                            | 3,252                           | 1,924                           | 368                          |           |
| 福井市                                                            |  | 20                               | 95                                 | 3.17                                             | 1.50                                             | 60.5                                        | 3,400,223       | 953,432                                | 77.73                      | 17,811                           | 11,013                                       | 2,620                                    | 2,287                          | 7,369                               | 1,748                            | 1,938                              | 1,254                          | 569                                 | 534                           | 481                         | 1,286                         | 2,366                       | 859                           | 731                        | 220                            | 2,417                           | 1,355                           | 788                          |           |
| 甲府市                                                            |  | 15                               | 93                                 | 2.88                                             | 1.43                                             | 61.2                                        | 3,276,907       | 930,343                                | 56.11                      | 17,731                           | 9,713                                        | 3,142                                    | 2,408                          | 8,331                               | 2,244                            | 1,537                              | 3,722                          | 783                                 | 524                           | 387                         | 375                           | 2,715                       | 777                           | 996                        | 83                             | 976                             | 1,303                           | 436                          |           |
| 長野市                                                            |  | 31                               | 93                                 | 3.01                                             | 1.47                                             | 60.2                                        | 3,460,956       | 926,326                                | 55.30                      | 18,573                           | 9,777                                        | 6,299                                    | 3,476                          | 9,497                               | 2,760                            | 2,330                              | 1,969                          | 407                                 | 503                           | 610                         | 846                           | 3,515                       | 705                           | 1,520                      | 210                            | 1,305                           | 1,124                           | 217                          |           |
| 岐阜市                                                            |  | 32                               | 93                                 | 3.16                                             | 1.57                                             | 59.6                                        | 3,865,952       | 997,596                                | 69.77                      | 22,081                           | 9,134                                        | 3,193                                    | 2,563                          | 9,742                               | 1,598                            | 2,999                              | 2,452                          | 588                                 | 395                           | 775                         | 376                           | 2,372                       | 876                           | 994                        | 240                            | 1,679                           | 1,148                           | 596                          |           |
| 静岡市                                                            |  | 57                               | 95                                 | 3.09                                             | 1.41                                             | 59.5                                        | 3,683,278       | 1,039,277                              | 89.11                      | 18,226                           | 9,680                                        | 3,132                                    | 3,264                          | 9,334                               | 1,945                            | 2,302                              | 5,423                          | 967                                 | 388                           | 1,080                       | 248                           | 2,219                       | 1,064                         | 1,031                      | 241                            | 1,107                           | 1,329                           | 564                          |           |
| 名古屋市                                                           |  | 177                              | 105                                | 3.11                                             | 1.51                                             | 56.3                                        | 3,433,756       | 963,590                                | 68.12                      | 25,181                           | 11,280                                       | 3,336                                    | 3,823                          | 8,547                               | 2,609                            | 2,555                              | 1,943                          | 535                                 | 520                           | 507                         | 300                           | 2,417                       | 711                           | 895                        | 128                            | 1,422                           | 871                             | 472                          |           |
| 津市                                                             |  | 23                               | 90                                 | 2.91                                             | 1.29                                             | 60.3                                        | 3,401,318       | 975,519                                | 57.47                      | 15,569                           | 11,012                                       | 4,356                                    | 2,886                          | 6,590                               | 2,053                            | 2,152                              | 2,285                          | 1,115                               | 981                           | 1,071                       | 275                           | 2,756                       | 970                           | 1,328                      | 315                            | 2,545                           | 1,127                           | 508                          |           |
| 大津市                                                            |  | 28                               | 94                                 | 2.86                                             | 1.14                                             | 61.7                                        | 3,318,414       | 1,008,064                              | 72.66                      | 22,235                           | 15,607                                       | 3,904                                    | 2,872                          | 9,459                               | 2,762                            | 2,684                              | 1,129                          | 1,296                               | 909                           | 1,117                       | 1,190                         | 2,923                       | 1,235                         | 1,663                      | 1,279                          | 2,978                           | 1,197                           | 534                          |           |
| 京都市                                                            |  | 113                              | 90                                 | 2.85                                             | 1.29                                             | 62.7                                        | 3,376,807       | 1,004,649                              | 57.39                      | 22,799                           | 12,619                                       | 4,399                                    | 2,958                          | 9,155                               | 2,396                            | 2,217                              | 1,117                          | 1,025                               | 713                           | 971                         | 1,041                         | 2,374                       | 1,021                         | 970                        | 696                            | 1,801                           | 1,294                           | 683                          |           |
| 大阪市                                                            |  | 203                              | 126                                | 3.05                                             | 1.40                                             | 59.7                                        | 3,225,215       | 1,018,324                              | 71.86                      | 24,220                           | 11,506                                       | 1,786                                    | 2,412                          | 8,367                               | 2,430                            | 2,309                              | 1,624                          | 675                                 | 794                           | 1,057                       | 899                           | 2,087                       | 840                           | 960                        | 880                            | 1,941                           | 1,363                           | 753                          |           |
| 神戸市                                                            |  | 124                              | 82                                 | 2.84                                             | 1.19                                             | 59.6                                        | 3,371,982       | 961,367                                | 66.17                      | 21,748                           | 11,247                                       | 2,734                                    | 2,564                          | 7,878                               | 2,691                            | 2,416                              | 1,372                          | 664                                 | 444                           | 853                         | 620                           | 1,919                       | 889                           | 922                        | 781                            | 1,651                           | 793                             | 522                          |           |
| 奈良市                                                            |  | 30                               | 95                                 | 2.84                                             | 0.98                                             | 61.7                                        | 3,688,893       | 1,030,566                              | 58.91                      | 22,453                           | 11,881                                       | 2,996                                    | 2,465                          | 7,722                               | 2,884                            | 2,540                              | 1,146                          | 887                                 | 939                           | 900                         | 1,112                         | 2,658                       | 1,051                         | 1,200                      | 580                            | 1,945                           | 1,426                           | 664                          |           |
| 和歌山市                                                           |  | 30                               | 92                                 | 2.72                                             | 1.11                                             | 63.3                                        | 2,698,241       | 852,941                                | 69.91                      | 23,070                           | 11,308                                       | 4,398                                    | 1,567                          | 7,883                               | 2,451                            | 1,551                              | 1,503                          | 972                                 | 749                           | 1,188                       | 538                           | 2,126                       | 1,313                         | 1,089                      | 814                            | 2,233                           | 1,174                           | 594                          |           |
| 鳥取市                                                            |  | 15                               | 94                                 | 3.30                                             | 1.54                                             | 57.9                                        | 3,203,459       | 906,974                                | 69.62                      | 25,817                           | 12,178                                       | 2,412                                    | 3,563                          | 7,272                               | 2,860                            | 1,996                              | 591                            | 1,264                               | 1,640                         | 623                         | 3,575                         | 2,017                       | 1,428                         | 1,235                      | 307                            | 2,802                           | 1,882                           | 475                          |           |
| 松江市                                                            |  | 16                               | 93                                 | 2.96                                             | 1.38                                             | 57.5                                        | 3,759,872       | 954,200                                | 58.03                      | 21,468                           | 8,822                                        | 3,958                                    | 2,706                          | 9,503                               | 1,641                            | 2,077                              | 444                            | 1,893                               | 1,154                         | 523                         | 1,372                         | 2,176                       | 1,580                         | 801                        | 575                            | 2,400                           | 1,583                           | 321                          |           |
| 岡山市                                                            |  | 55                               | 91                                 | 3.04                                             | 1.37                                             | 57.3                                        | 3,490,979       | 893,087                                | 49.48                      | 21,299                           | 12,569                                       | 6,248                                    | 2,501                          | 7,612                               | 1,838                            | 2,439                              | 756                            | 817                                 | 576                           | 859                         | 773                           | 2,093                       | 1,103                         | 1,092                      | 404                            | 1,647                           | 843                             | 485                          |           |
| 広島市                                                            |  | 95                               | 89                                 | 2.99                                             | 1.26                                             | 58.7                                        | 3,387,687       | 957,488                                | 59.88                      | 21,549                           | 13,608                                       | 2,513                                    | 2,843                          | 8,238                               | 2,415                            | 1,667                              | 580                            | 1,333                               | 950                           | 698                         | 930                           | 2,080                       | 987                           | 1,005                      | 791                            | 1,839                           | 1,218                           | 581                          |           |
| 山口市                                                            |  | 16                               | 94                                 | 3.06                                             | 1.52                                             |                                             |                 |                                        |                            |                                  |                                              |                                          |                                |                                     |                                  |                                    |                                |                                     |                               |                             |                               |                             |                               |                            |                                |                                 |                                 |                              |           |

| 21                 | 22          | 23            | 24             | 25          | 26          | 27               | 28                | 29                              | 30             | 31                               | 32          | 33          | 34          | 35              | 36          | 37          | 38          | 39            | 40               | 41          | 42          | 43          | 44          | 45          | 46                 | 47             | 48          | 49          | 50             | 51              | 52              |
|--------------------|-------------|---------------|----------------|-------------|-------------|------------------|-------------------|---------------------------------|----------------|----------------------------------|-------------|-------------|-------------|-----------------|-------------|-------------|-------------|---------------|------------------|-------------|-------------|-------------|-------------|-------------|--------------------|----------------|-------------|-------------|----------------|-----------------|-----------------|
| えび                 | かに          | あさり           | しじみ            | かき          | ほたて         | 貝                | たらこ               | しらすが干し                          | 干しあじ           | かつお節                             | 牛肉          | 豚肉          | 鶏肉          | 合いびき肉           | ハム          | ソーセージ       | ベーコン        | 牛乳            | 粉ミルク             | バター         | チーズ         | 卵           | キャベツ        | ほうれん草       | はくさい               | ねぎ             | レタス         | ブロッコリー      | もやし            | さつまいも           | じゃがいも           |
| Shrimps & Crabs 1g | Crabs 1g    | Short-neck 1g | Fresh water 1g | Oysters 1g  | Scallops 1g | Salted salmon 1g | Salted pollock 1g | "Shirasu-boshi", dried young 1g | Dried horse 1g | Bonito fillets & fish flakes, 1g | Beef 1g     | Pork 1g     | Chicken 1g  | Mixed ground 1g | Ham 1g      | Sausages 1g | Bacon 1g    | Fresh milk 1l | Powdered milk 1g | Butter 1g   | Cheese 1g   | Eggs 1g     | Cabbage 1g  | Spinach 1g  | Chinese cabbage 1g | Welsh onion 1g | Lettuce 1g  | Broccoli 1g | Bean sprout 1g | Sweet potato 1g | White potato 1g |
| 数量<br>Quan.        | 数量<br>Quan. | 数量<br>Quan.   | 数量<br>Quan.    | 数量<br>Quan. | 数量<br>Quan. | 数量<br>Quan.      | 数量<br>Quan.       | 数量<br>Quan.                     | 数量<br>Quan.    | 数量<br>Quan.                      | 数量<br>Quan. | 数量<br>Quan. | 数量<br>Quan. | 数量<br>Quan.     | 数量<br>Quan. | 数量<br>Quan. | 数量<br>Quan. | 数量<br>Quan.   | 数量<br>Quan.      | 数量<br>Quan. | 数量<br>Quan. | 数量<br>Quan. | 数量<br>Quan. | 数量<br>Quan. | 数量<br>Quan.        | 数量<br>Quan.    | 数量<br>Quan. | 数量<br>Quan. | 数量<br>Quan.    | 数量<br>Quan.     | 数量<br>Quan.     |
| 1,347              | 358         | 705           | 286            | 467         | 393         | 1,278            | 665               | 398                             | 575            | 227                              | 6,717       | 21,518      | 16,865      | 2,038           | 2,592       | 5,301       | 1,546       | 76.24         | 287              | 503         | 3,488       | 31,933      | 17,020      | 3,054       | 7,787              | 4,415          | 6,282       | 4,085       | 6,743          | 2,618           | 9,470           |
| 1,808              | 416         | 554           | 360            | 208         | 1,036       | 1,933            | 917               | 187                             | 143            | 157                              | 4,958       | 25,065      | 18,210      | 1,100           | 2,311       | 5,825       | 2,203       | 68.70         | 667              | 732         | 4,098       | 30,225      | 15,736      | 2,884       | 9,099              | 4,433          | 4,825       | 3,832       | 7,106          | 2,956           | 13,439          |
| 1,219              | 1,909       | 562           | 772            | 151         | 4,100       | 2,707            | 1,648             | 227                             | 300            | 116                              | 6,528       | 23,463      | 14,759      | 970             | 2,829       | 6,546       | 1,874       | 62.48         | 165              | 357         | 3,204       | 36,643      | 16,985      | 3,591       | 6,241              | 5,221          | 6,012       | 4,116       | 9,234          | 2,065           | 8,432           |
| 991                | 193         | 546           | 403            | 379         | 906         | 2,719            | 654               | 236                             | 511            | 140                              | 4,068       | 23,174      | 16,821      | 1,162           | 2,690       | 5,987       | 1,595       | 79.71         | 361              | 424         | 4,051       | 33,935      | 19,425      | 4,154       | 6,856              | 6,603          | 4,724       | 5,035       | 9,652          | 2,988           | 8,852           |
| 1,002              | 154         | 762           | 461            | 517         | 416         | 2,089            | 659               | 369                             | 277            | 152                              | 5,708       | 23,066      | 13,191      | 1,038           | 2,735       | 5,799       | 2,139       | 86.77         | 116              | 543         | 3,839       | 32,279      | 14,760      | 3,516       | 11,849             | 5,001          | 4,885       | 4,196       | 9,431          | 4,330           | 8,366           |
| 1,679              | 266         | 553           | 744            | 312         | 655         | 2,560            | 1,581             | 261                             | 393            | 148                              | 4,755       | 24,263      | 16,832      | 859             | 2,672       | 6,152       | 1,974       | 71.38         | 160              | 362         | 2,962       | 36,045      | 20,342      | 4,535       | 6,620              | 6,509          | 5,684       | 5,006       | 10,423         | 2,663           | 8,331           |
| 985                | 212         | 594           | 259            | 500         | 518         | 2,090            | 1,036             | 225                             | 325            | 226                              | 7,743       | 19,051      | 14,618      | 926             | 2,103       | 5,233       | 2,044       | 73.50         | 393              | 362         | 3,622       | 33,193      | 15,953      | 3,957       | 5,096              | 5,670          | 4,697       | 5,026       | 8,713          | 2,191           | 7,850           |
| 782                | 160         | 812           | 462            | 385         | 362         | 2,519            | 803               | 456                             | 380            | 151                              | 3,678       | 22,098      | 11,749      | 635             | 3,111       | 4,682       | 1,609       | 68.22         | 246              | 364         | 3,203       | 31,796      | 14,758      | 3,628       | 5,635              | 3,953          | 5,215       | 4,106       | 7,489          | 2,634           | 7,452           |
| 779                | 145         | 552           | 809            | 317         | 308         | 2,009            | 865               | 645                             | 537            | 262                              | 4,551       | 21,131      | 13,809      | 1,233           | 3,149       | 5,575       | 1,426       | 77.09         | 609              | 445         | 3,230       | 30,697      | 17,968      | 3,291       | 7,071              | 5,169          | 6,150       | 4,576       | 5,783          | 6,626           | 8,238           |
| 1,152              | 454         | 838           | 295            | 246         | 259         | 1,243            | 715               | 705                             | 612            | 184                              | 5,013       | 20,221      | 13,280      | 1,067           | 2,706       | 4,412       | 1,238       | 79.21         | 593              | 514         | 3,490       | 30,010      | 17,646      | 2,967       | 5,993              | 5,070          | 5,771       | 4,892       | 6,945          | 2,626           | 7,921           |
| 1,107              | 287         | 958           | 207            | 365         | 278         | 1,173            | 864               | 458                             | 703            | 207                              | 3,355       | 18,048      | 10,708      | 952             | 3,466       | 4,652       | 1,320       | 62.23         | 262              | 380         | 3,542       | 26,963      | 16,327      | 2,900       | 8,500              | 4,083          | 9,126       | 4,745       | 6,831          | 2,650           | 8,580           |
| 1,060              | 184         | 768           | 314            | 634         | 496         | 1,449            | 797               | 444                             | 804            | 184                              | 5,983       | 26,137      | 16,873      | 2,065           | 2,947       | 5,036       | 1,656       | 84.37         | 274              | 480         | 4,220       | 30,330      | 18,910      | 3,494       | 8,328              | 5,584          | 7,681       | 5,100       | 7,442          | 2,559           | 10,629          |
| 1,394              | 438         | 800           | 443            | 677         | 707         | 1,331            | 735               | 428                             | 875            | 266                              | 6,789       | 22,651      | 16,793      | 1,930           | 2,379       | 5,162       | 1,561       | 95.77         | 412              | 590         | 4,125       | 29,979      | 18,388      | 4,324       | 9,092              | 6,005          | 9,418       | 5,527       | 7,309          | 2,650           | 11,273          |
| 1,055              | 205         | 809           | 287            | 483         | 473         | 1,286            | 687               | 508                             | 784            | 180                              | 7,345       | 22,469      | 16,196      | 1,874           | 2,791       | 4,629       | 1,623       | 77.46         | 270              | 674         | 4,206       | 26,432      | 18,252      | 3,355       | 7,922              | 5,600          | 8,344       | 5,595       | 7,025          | 2,260           | 10,134          |
| 1,045              | 154         | 844           | 341            | 569         | 434         | 1,132            | 641               | 576                             | 975            | 232                              | 6,195       | 22,343      | 15,279      | 1,705           | 2,981       | 4,681       | 1,729       | 84.35         | 252              | 703         | 4,347       | 27,172      | 17,150      | 3,485       | 6,808              | 4,884          | 7,077       | 4,988       | 6,577          | 2,695           | 10,318          |
| 966                | 1,450       | 1,129         | 463            | 318         | 509         | 3,521            | 1,259             | 291                             | 418            | 165                              | 4,271       | 27,027      | 15,973      | 1,078           | 2,653       | 5,253       | 1,783       | 94.02         | 291              | 327         | 3,528       | 32,881      | 16,858      | 4,036       | 7,255              | 6,285          | 7,693       | 5,132       | 9,947          | 2,728           | 10,631          |
| 1,992              | 909         | 675           | 409            | 340         | 416         | 1,913            | 643               | 385                             | 480            | 143                              | 5,348       | 21,150      | 14,460      | 2,847           | 3,227       | 6,223       | 1,620       | 82.08         | 49               | 408         | 4,086       | 38,311      | 18,701      | 4,385       | 7,831              | 4,818          | 6,598       | 4,605       | 8,698          | 2,154           | 9,712           |
| 1,608              | 657         | 534           | 248            | 453         | 260         | 1,236            | 644               | 331                             | 333            | 150                              | 7,551       | 21,753      | 14,527      | 2,678           | 3,150       | 6,619       | 1,640       | 78.37         | 118              | 536         | 3,634       | 31,883      | 15,798      | 2,864       | 7,904              | 3,938          | 5,671       | 4,221       | 8,561          | 1,847           | 8,644           |
| 1,042              | 1,072       | 515           | 161            | 482         | 250         | 1,322            | 537               | 512                             | 464            | 172                              | 7,442       | 17,851      | 13,815      | 2,461           | 3,048       | 5,355       | 1,242       | 65.69         | 166              | 509         | 2,829       | 29,797      | 13,068      | 3,648       | 5,934              | 3,706          | 3,727       | 2,947       | 7,086          | 2,455           | 10,186          |
| 1,127              | 370         | 921           | 492            | 379         | 499         | 1,568            | 501               | 716                             | 970            | 177                              | 4,878       | 21,490      | 12,425      | 1,118           | 2,971       | 5,123       | 1,558       | 65.92         | 591              | 439         | 2,850       | 24,068      | 17,288      | 3,257       | 6,862              | 3,829          | 7,565       | 4,384       | 5,528          | 1,835           | 7,749           |
| 1,005              | 621         | 903           | 381            | 412         | 406         | 1,765            | 1,088             | 495                             | 842            | 173                              | 3,119       | 20,863      | 13,675      | 1,145           | 2,313       | 5,364       | 1,536       | 91.14         | 551              | 447         | 3,881       | 31,841      | 16,448      | 3,386       | 7,482              | 3,144          | 7,143       | 4,742       | 7,395          | 2,757           | 7,462           |
| 1,328              | 383         | 921           | 431            | 441         | 298         | 878              | 591               | 430                             | 588            | 197                              | 6,882       | 19,179      | 13,569      | 2,136           | 3,347       | 4,540       | 1,424       | 71.92         | 298              | 522         | 3,283       | 32,644      | 13,630      | 2,941       | 9,171              | 4,947          | 6,450       | 4,093       | 6,436          | 2,399           | 9,735           |
| 1,254              | 469         | 1,189         | 232            | 427         | 391         | 1,488            | 525               | 1,191                           | 1,255          | 410                              | 5,246       | 24,005      | 17,102      | 1,616           | 3,023       | 5,192       | 1,986       | 70.29         | 523              | 726         | 3,898       | 29,311      | 19,372      | 3,228       | 8,559              | 5,251          | 6,622       | 3,829       | 6,539          | 2,402           | 12,083          |
| 1,416              | 438         | 667           | 237            | 412         | 275         | 831              | 534               | 422                             | 468            | 180                              | 5,553       | 21,165      | 16,815      | 2,777           | 2,643       | 6,081       | 1,337       | 78.61         | 557              | 561         | 3,999       | 32,911      | 18,013      | 2,768       | 8,104              | 5,331          | 7,247       | 4,638       | 6,933          | 2,428           | 10,279          |
| 1,588              | 203         | 872           | 203            | 626         | 330         | 1,981            | 421               | 537                             | 499            | 233                              | 8,254       | 17,937      | 16,496      | 2,296           | 2,363       | 6,283       | 1,424       | 79.67         | 934              | 533         | 3,022       | 34,394      | 17,065      | 2,822       | 7,607              | 4,260          | 5,392       | 3,689       | 5,498          | 3,333           | 9,013           |
| 1,736              | 366         | 596           | 140            | 513         | 240         | 1,688            | 839               | 592                             | 572            | 184                              | 9,523       | 20,652      | 18,777      | 2,976           | 3,300       | 5,009       | 1,670       | 77.30         | 344              | 693         | 3,605       | 34,894      | 20,395      | 4,173       | 11,384             | 4,274          | 7,692       | 5,128       | 7,551          | 3,190           | 11,130          |
| 1,617              | 1,250       | 732           | 198            | 394         | 411         | 939              | 794               | 586                             | 540            | 297                              | 8,714       | 17,825      | 18,336      | 2,110           | 3,071       | 4,314       | 1,283       | 76.60         | 354              | 610         | 3,869       | 31,521      | 17,839      | 3,884       | 8,218              | 4,523          | 6,786       | 4,949       | 6,320          | 3,092           | 11,777          |
| 1,789              | 597         | 519           | 205            | 708         | 355         | 1,586            | 723               | 425                             | 369            | 272                              | 10,125      | 20,975      | 18,250      | 2,899           | 3,012       | 5,347       | 1,342       | 82.73         | 229              | 423         | 3,302       | 34,956      | 17,651      | 3,051       | 11,949             | 4,467          | 6,488       | 4,576       | 5,823          | 3,121           | 10,537          |
| 1,620              | 672         | 291           | 94             | 619         | 234         | 925              | 446               | 272                             | 189            | 245                              | 7,939       | 19,536      | 17,612      | 2,467           | 2,765       | 4,917       | 1,238       | 87.50         | 201              | 662         | 3,656       | 30,355      | 15,989      | 2,951       | 9,603              | 3,548          | 5,010       | 3,781       | 5,900          | 1,745           | 8,213           |
| 1,505              | 221         | 633           | 216            | 561         | 311         | 1,437            | 480               | 581                             | 381            | 279                              | 10,288      | 18,142      | 17,191      | 2,429           | 2,860       | 5,355       | 1,365       | 83.22         | 216              | 618         | 3,725       | 33,088      | 17,727      | 3,546       | 9,832              | 4,306          | 6,458       | 5,105       | 6,080          | 2,712           | 11,640          |
| 1,978              | 417         | 536           | 176            | 598         | 185         | 1,089            | 457               | 1,115                           | 575            | 323                              | 9,691       | 19,906      | 17,848      | 2,097           | 2,327       | 4,336       | 1,252       | 75.02         | 235              | 500         | 2,386       | 33,851      | 16,574      | 2,347       | 9,001              | 3,661          | 5,266       | 3,637       | 5,483          | 2,704           | 11,168          |
| 1,835              | 2,299       | 740           | 424            | 761         | 230         | 1,335            | 438               | 236                             | 568            | 146                              | 7,687       | 20,349      | 21,097      | 3,772           | 2,211       | 6,342       | 1,443       | 82.09         | 258              | 344         | 2,983       | 41,932      | 16,748      | 3,386       | 8,639              | 4,091          | 5,609       | 4,258       | 8,668          | 1,867           | 8,883           |
| 1,250              | 1,298       | 685           | 1,702          | 258         | 187         | 869              | 335               | 247                             | 583            | 149                              | 6,387       | 21,457      | 19,389      | 2,877           | 2,367       | 5,375       | 1,433       | 85.40         | 291              | 519         | 3,233       | 32,255      | 18,785      | 3,502       | 7,776              | 4,350          | 5,926       | 4,389       | 7,007          | 3,018           | 10,770          |
| 1,375              | 65          | 416           | 149            | 590         | 144         | 1,218            | 426               | 315                             | 183            | 191                              | 6,719       | 19,698      | 16,776      | 2,517           | 1,676       | 4,435       | 1,324       | 75.75         | 189              | 403         | 2,939       | 30,123      | 16,514      | 2,628       | 8,976              | 3,380          | 5,052       | 3,944       | 6,324          | 2,840           | 8,019           |
| 1,482              | 264         | 677           | 223            | 1,624       | 236         | 666              | 553               | 176                             | 177            | 157                              | 9,330       | 21,216      | 18,284      | 2,228           | 2,524       | 5,518       | 1,382       | 83.77         | 206              | 570         | 2,898       | 33,826      | 18,466      | 2,928       | 8,849              | 4,234          | 5,299       | 4,198       | 6,396          | 2,227           | 9,735           |
| 1,817              | 184         | 628           | 123            | 504         | 288         | 906              | 744               | 158                             | 607            | 115                              | 8,519       | 20,683      | 18,584      | 2,541           | 2,420       | 6,398       | 1,888       | 77.89         | 437              | 447         | 3,183       | 36,400      | 16,928      | 2,548       | 10,342             | 3,106          | 5,459       | 3,591       | 7,713          | 2,312           | 9,442           |
| 1,236              | 131         | 651           | 128            | 271         | 151         | 1,148            | 208               | 237                             | 194            | 290                              | 7,660       | 16,124      | 14,738      | 2,517           | 1,722       | 4,683       | 1,081       | 75.65         | 401              | 467         | 2,771       | 29,888      |             |             |                    |                |             |             |                |                 |                 |

|       | 53          | 54             | 55            | 56             | 57           | 58                | 59               | 60                 | 61             | 62              | 63              | 64             | 65               | 66                                      | 67                                    | 68              | 69                 | 70                         | 71                                | 72                   | 73                        | 74                                   | 75           | 76                | 77                | 78            | 79          | 80           | 81               | 82            | 83               | 84           |
|-------|-------------|----------------|---------------|----------------|--------------|-------------------|------------------|--------------------|----------------|-----------------|-----------------|----------------|------------------|-----------------------------------------|---------------------------------------|-----------------|--------------------|----------------------------|-----------------------------------|----------------------|---------------------------|--------------------------------------|--------------|-------------------|-------------------|---------------|-------------|--------------|------------------|---------------|------------------|--------------|
|       | さといも        | だいこん           | にんじん          | ごぼう            | たまねぎ         | れんこん              | たけのこ             | さやまめ               | かぼちゃ           | きゅうり            | なす              | トマト            | ピーマン             | 生しいたけ                                   | 干しいたけ                                 | わかめ             | こんぶ                | 豆腐                         | 梅干し                               | だいこん漬                | はくさい漬                     | こんぶつた                                | りんご          | みかん               | グレープフルーツ          | オレンジ          | 梨           | ぶどう          | 柿                | 桃             | すいか              | メロン          |
|       | Taros<br>1g | Radishes<br>1g | Carrots<br>1g | Burdocks<br>1g | Onions<br>1g | Lotus roots<br>1g | Bamboo shc<br>1g | String beans<br>1g | Pumpkins<br>1g | Cucumbers<br>1g | Eggplants<br>1g | Tomatoes<br>1g | Green pepp<br>1g | "Shitake",<br>Japanese m<br>fresh<br>1g | "Shitake",<br>Japanese<br>dried<br>1g | "Wakame",<br>1g | Dried tangie<br>1g | Bean curd<br>1丁 each<br>1g | "Umeboshi",<br>pickled plum<br>1g | Pickled radish<br>1g | Pickled chinese cab<br>1g | Tangle prepared<br>in soy sauc<br>1g | Apples<br>1g | Mandarin or<br>1g | Grapefruits<br>1g | Oranges<br>1g | Pears<br>1g | Grapes<br>1g | Persimmons<br>1g | Peaches<br>1g | Watermelon<br>1g | Melons<br>1g |
|       | 数量<br>Quan. | 数量<br>Quan.    | 数量<br>Quan.   | 数量<br>Quan.    | 数量<br>Quan.  | 数量<br>Quan.       | 数量<br>Quan.      | 数量<br>Quan.        | 数量<br>Quan.    | 数量<br>Quan.     | 数量<br>Quan.     | 数量<br>Quan.    | 数量<br>Quan.      | 数量<br>Quan.                             | 数量<br>Quan.                           | 数量<br>Quan.     | 数量<br>Quan.        | 数量<br>Quan.                | 数量<br>Quan.                       | 数量<br>Quan.          | 数量<br>Quan.               | 数量<br>Quan.                          | 数量<br>Quan.  | 数量<br>Quan.       | 数量<br>Quan.       | 数量<br>Quan.   | 数量<br>Quan. | 数量<br>Quan.  | 数量<br>Quan.      | 数量<br>Quan.   | 数量<br>Quan.      | 数量<br>Quan.  |
| 1,502 | 11,698      | 8,037          | 1,566         | 15,997         | 1,350        | 753               | 1,785            | 3,840              | 7,715          | 4,140           | 11,888          | 2,925          | 1,586            | 47                                      | 865                                   | 277             | 83,86              | 710                        | 1,300                             | 784                  | 558                       | 10,363                               | 9,476        | 747               | 1,332             | 3,354         | 2,272       | 2,440        | 1,299            | 3,555         | 1,801            |              |
| 600   | 16,140      | 7,483          | 1,599         | 21,041         | 764          | 768               | 1,449            | 3,947              | 6,694          | 4,023           | 9,945           | 2,721          | 1,819            | 58                                      | 447                                   | 261             | 55,71              | 766                        | 1,074                             | 504                  | 515                       | 9,402                                | 9,771        | 759               | 1,670             | 1,439         | 1,472       | 2,546        | 1,146            | 2,890         | 2,331            |              |
| 461   | 11,889      | 8,393          | 2,289         | 17,964         | 758          | 725               | 1,932            | 3,254              | 6,748          | 5,130           | 13,008          | 2,771          | 1,833            | 47                                      | 1,731                                 | 576             | 84,53              | 1,028                      | 1,967                             | 637                  | 591                       | 25,845                               | 7,283        | 1,103             | 1,793             | 1,563         | 1,550       | 3,939        | 1,134            | 1,575         | 3,063            |              |
| 1,447 | 16,392      | 9,998          | 2,484         | 18,069         | 1,019        | 625               | 2,527            | 4,850              | 8,345          | 4,470           | 13,452          | 2,970          | 2,029            | 56                                      | 1,868                                 | 576             | 93,49              | 876                        | 1,588                             | 651                  | 625                       | 32,513                               | 10,523       | 979               | 1,270             | 4,230         | 3,701       | 2,603        | 1,231            | 2,239         | 1,975            |              |
| 1,718 | 14,548      | 8,497          | 2,098         | 15,585         | 1,523        | 1,425             | 2,062            | 5,059              | 9,034          | 5,204           | 12,443          | 3,168          | 1,544            | 44                                      | 1,602                                 | 395             | 82,70              | 584                        | 1,387                             | 1,001                | 523                       | 11,386                               | 8,507        | 1,255             | 1,144             | 6,231         | 1,836       | 2,805        | 1,436            | 5,699         | 1,459            |              |
| 722   | 14,779      | 8,454          | 1,939         | 17,717         | 821          | 635               | 4,051            | 4,998              | 9,127          | 6,469           | 14,174          | 3,184          | 2,198            | 35                                      | 1,632                                 | 403             | 77,82              | 1,075                      | 2,370                             | 559                  | 486                       | 19,117                               | 8,414        | 872               | 1,041             | 3,264         | 2,355       | 1,362        | 1,218            | 3,584         | 3,543            |              |
| 2,240 | 13,706      | 7,851          | 2,007         | 14,180         | 915          | 1,279             | 1,800            | 3,908              | 8,684          | 4,692           | 8,796           | 2,365          | 1,512            | 41                                      | 970                                   | 445             | 89,55              | 626                        | 1,429                             | 990                  | 650                       | 12,910                               | 10,066       | 967               | 958               | 3,836         | 3,564       | 2,250        | 2,082            | 3,359         | 1,501            |              |
| 1,583 | 11,558      | 7,963          | 1,607         | 13,248         | 838          | 954               | 1,675            | 3,293              | 8,656          | 4,247           | 11,182          | 1,934          | 1,722            | 15                                      | 1,020                                 | 327             | 88,64              | 955                        | 1,479                             | 1,121                | 710                       | 16,209                               | 7,360        | 343               | 882               | 6,384         | 3,446       | 1,795        | 11,772           | 2,957         | 790              |              |
| 1,309 | 13,224      | 8,225          | 1,456         | 16,359         | 1,343        | 217               | 1,174            | 3,874              | 8,544          | 3,723           | 12,658          | 3,176          | 1,582            | 44                                      | 1,360                                 | 350             | 80,35              | 766                        | 1,150                             | 709                  | 928                       | 15,854                               | 10,275       | 926               | 1,884             | 5,098         | 1,869       | 1,777        | 1,176            | 2,694         | 6,786            |              |
| 1,930 | 13,213      | 9,509          | 1,761         | 14,091         | 1,015        | 1,242             | 1,799            | 3,724              | 8,256          | 4,515           | 12,731          | 2,668          | 1,794            | 18                                      | 1,025                                 | 277             | 93,56              | 597                        | 1,236                             | 1,092                | 660                       | 11,240                               | 9,983        | 1,057             | 1,100             | 5,310         | 2,090       | 1,652        | 1,068            | 3,810         | 1,594            |              |
| 1,889 | 10,807      | 7,805          | 1,510         | 12,626         | 823          | 764               | 1,750            | 3,755              | 10,466         | 2,827           | 16,245          | 2,626          | 1,863            | 57                                      | 1,201                                 | 404             | 94,67              | 679                        | 1,693                             | 846                  | 739                       | 15,016                               | 11,149       | 1,221             | 1,334             | 3,957         | 2,459       | 1,271        | 1,245            | 2,727         | 2,400            |              |
| 2,405 | 13,847      | 9,012          | 1,665         | 18,045         | 1,333        | 1,240             | 2,540            | 3,868              | 9,929          | 5,192           | 15,685          | 3,445          | 1,495            | 39                                      | 907                                   | 296             | 79,34              | 1,170                      | 1,204                             | 846                  | 640                       | 10,937                               | 8,150        | 974               | 1,702             | 2,940         | 2,373       | 1,206        | 1,338            | 4,585         | 1,807            |              |
| 1,498 | 14,041      | 9,498          | 1,452         | 17,065         | 1,455        | 765               | 2,581            | 4,490              | 8,331          | 4,683           | 16,483          | 3,723          | 1,704            | 29                                      | 1,141                                 | 197             | 98,97              | 857                        | 1,342                             | 1,345                | 650                       | 9,818                                | 8,378        | 1,105             | 2,328             | 5,483         | 2,863       | 2,467        | 1,149            | 4,410         | 1,660            |              |
| 1,574 | 13,619      | 8,324          | 1,371         | 16,264         | 1,400        | 709               | 2,763            | 4,106              | 8,845          | 4,995           | 14,686          | 3,517          | 1,467            | 32                                      | 884                                   | 245             | 80,80              | 822                        | 1,082                             | 1,007                | 467                       | 9,437                                | 9,131        | 1,097             | 1,301             | 3,286         | 2,464       | 2,510        | 1,460            | 3,847         | 2,034            |              |
| 1,696 | 12,912      | 8,976          | 1,482         | 16,673         | 1,451        | 786               | 2,527            | 4,605              | 8,375          | 5,273           | 13,442          | 3,478          | 1,349            | 74                                      | 1,044                                 | 317             | 78,32              | 646                        | 1,021                             | 834                  | 522                       | 11,596                               | 10,964       | 784               | 2,520             | 4,758         | 2,071       | 2,829        | 1,309            | 4,939         | 2,088            |              |
| 2,630 | 14,256      | 9,540          | 1,536         | 16,605         | 2,626        | 1,182             | 4,053            | 4,819              | 8,706          | 4,930           | 15,133          | 3,574          | 2,213            | 52                                      | 1,198                                 | 395             | 110,87             | 775                        | 1,293                             | 728                  | 861                       | 11,720                               | 14,779       | 1,476             | 938               | 8,614         | 2,183       | 2,911        | 2,216            | 4,674         | 1,759            |              |
| 1,926 | 11,671      | 7,537          | 1,525         | 14,729         | 1,383        | 859               | 1,370            | 4,758              | 8,522          | 4,633           | 12,272          | 2,969          | 1,617            | 56                                      | 840                                   | 424             | 100,24             | 909                        | 2,100                             | 1,251                | 964                       | 11,393                               | 10,058       | 829               | 2,190             | 6,469         | 1,464       | 2,067        | 1,384            | 4,028         | 1,851            |              |
| 993   | 10,086      | 7,927          | 1,087         | 14,035         | 1,833        | 858               | 1,345            | 3,331              | 7,211          | 4,427           | 11,044          | 2,720          | 1,851            | 47                                      | 823                                   | 476             | 88,06              | 619                        | 1,389                             | 759                  | 697                       | 8,417                                | 5,788        | 351               | 1,794             | 3,507         | 1,848       | 1,634        | 791              | 4,881         | 979              |              |
| 2,141 | 10,604      | 7,272          | 1,215         | 13,917         | 892          | 1,018             | 1,190            | 3,240              | 7,309          | 4,281           | 11,807          | 2,169          | 2,162            | 39                                      | 1,099                                 | 318             | 70,23              | 566                        | 1,916                             | 544                  | 1,114                     | 9,571                                | 10,261       | 672               | 677               | 3,348         | 2,241       | 1,381        | 613              | 2,360         | 1,217            |              |
| 1,645 | 12,250      | 7,823          | 1,507         | 13,755         | 1,418        | 827               | 1,301            | 4,207              | 8,478          | 3,594           | 11,011          | 2,506          | 1,486            | 45                                      | 1,036                                 | 159             | 86,25              | 509                        | 1,297                             | 837                  | 911                       | 8,105                                | 8,646        | 968               | 1,319             | 1,409         | 4,908       | 1,494        | 3,365            | 1,722         | 1,073            |              |
| 1,189 | 13,468      | 7,955          | 1,530         | 12,744         | 1,820        | 626               | 1,647            | 4,003              | 9,910          | 3,232           | 14,788          | 2,728          | 1,357            | 87                                      | 1,324                                 | 490             | 76,75              | 762                        | 1,113                             | 488                  | 656                       | 21,429                               | 9,211        | 542               | 1,574             | 1,513         | 2,391       | 898          | 3,811            | 2,738         | 1,164            |              |
| 2,419 | 10,506      | 6,891          | 1,583         | 14,376         | 1,550        | 887               | 2,155            | 4,808              | 7,125          | 4,447           | 10,963          | 2,680          | 1,482            | 70                                      | 665                                   | 257             | 103,25             | 601                        | 995                               | 652                  | 804                       | 10,602                               | 5,986        | 1,036             | 1,463             | 2,860         | 2,557       | 10,194       | 1,081            | 3,478         | 1,185            |              |
| 2,040 | 13,400      | 8,922          | 1,369         | 16,329         | 1,878        | 883               | 2,082            | 3,754              | 7,513          | 4,096           | 12,297          | 2,777          | 1,705            | 39                                      | 1,306                                 | 355             | 97,89              | 495                        | 1,503                             | 1,262                | 451                       | 6,787                                | 14,465       | 505               | 1,275             | 1,166         | 1,699       | 1,607        | 800              | 2,565         | 895              |              |
| 1,889 | 12,081      | 8,591          | 1,337         | 17,413         | 1,800        | 821               | 2,171            | 4,545              | 7,054          | 4,473           | 11,489          | 3,020          | 1,613            | 57                                      | 675                                   | 117             | 93,54              | 621                        | 1,294                             | 709                  | 455                       | 8,017                                | 6,301        | 577               | 1,399             | 2,565         | 2,031       | 3,615        | 1,048            | 2,056         | 1,309            |              |
| 1,398 | 12,041      | 7,957          | 1,547         | 15,390         | 1,345        | 767               | 1,300            | 4,775              | 6,596          | 3,861           | 14,386          | 2,642          | 1,698            | 67                                      | 1,009                                 | 211             | 81,75              | 785                        | 1,823                             | 402                  | 571                       | 8,456                                | 12,794       | 399               | 888               | 5,221         | 2,411       | 3,039        | 629              | 2,573         | 1,983            |              |
| 1,845 | 14,342      | 9,325          | 1,495         | 18,909         | 1,331        | 1,153             | 1,936            | 5,584              | 8,132          | 5,284           | 15,603          | 3,162          | 1,896            | 32                                      | 708                                   | 442             | 86,57              | 581                        | 1,204                             | 933                  | 1,183                     | 11,508                               | 12,895       | 476               | 1,709             | 2,683         | 1,957       | 2,713        | 1,256            | 2,848         | 1,147            |              |
| 1,381 | 14,109      | 8,005          | 1,398         | 18,043         | 1,421        | 1,588             | 1,945            | 4,533              | 8,801          | 5,895           | 13,930          | 3,582          | 1,666            | 100                                     | 835                                   | 310             | 89,63              | 628                        | 1,475                             | 778                  | 730                       | 10,244                               | 8,678        | 1,393             | 1,109             | 2,455         | 1,762       | 4,248        | 933              | 4,042         | 1,473            |              |
| 1,443 | 12,440      | 7,709          | 1,272         | 18,927         | 1,324        | 619               | 1,869            | 4,346              | 6,740          | 4,144           | 11,930          | 3,572          | 1,595            | 29                                      | 712                                   | 356             | 78,08              | 690                        | 1,535                             | 1,179                | 1,095                     | 8,781                                | 7,309        | 967               | 1,859             | 1,511         | 1,664       | 2,352        | 960              | 3,777         | 878              |              |
| 985   | 10,032      | 7,093          | 1,206         | 13,773         | 1,318        | 785               | 1,912            | 3,409              | 5,744          | 3,789           | 14,116          | 3,455          | 1,929            | 35                                      | 462                                   | 202             | 75,79              | 572                        | 1,201                             | 617                  | 441                       | 9,149                                | 6,075        | 463               | 1,316             | 2,272         | 2,066       | 2,863        | 397              | 3,717         | 545              |              |
| 1,772 | 14,068      | 8,322          | 1,502         | 16,920         | 1,704        | 934               | 1,957            | 4,137              | 8,265          | 6,052           | 13,158          | 3,509          | 2,211            | 36                                      | 612                                   | 271             | 90,09              | 658                        | 1,797                             | 773                  | 722                       | 12,127                               | 11,822       | 1,252             | 1,691             | 3,551         | 2,391       | 5,781        | 1,879            | 5,109         | 889              |              |
| 1,258 | 11,159      | 6,618          | 1,378         | 16,173         | 1,001        | 548               | 1,546            | 3,982              | 5,960          | 3,420           | 9,345           | 2,539          | 1,598            | 57                                      | 638                                   | 253             | 70,94              | 679                        | 1,190                             | 410                  | 786                       | 11,255                               | 11,006       | 957               | 947               | 2,389         | 2,279       | 3,619        | 5,250            | 5,669         | 1,291            |              |
| 1,438 | 9,788       | 8,672          | 1,209         | 15,245         | 546          | 656               | 1,515            | 3,452              | 6,361          | 3,328           | 8,951           | 2,347          | 1,962            | 33                                      | 694                                   | 137             | 83,85              | 616                        | 1,425                             | 2,063                | 557                       | 8,619                                | 8,961        | 300               | 1,958             | 11,812        | 2,409       | 3,048        | 705              | 4,633         | 1,127            |              |
| 1,607 | 11,063      | 9,186          | 1,486         | 17,679         | 521          | 517               | 1,581            | 4,251              | 7,106          | 3,770           | 11,800          | 2,868          | 1,999            | 33                                      | 881                                   | 380             | 84,11              | 826                        | 1,444                             | 983                  | 447                       | 8,973                                | 6,731        | 1,209             | 1,431             | 5,608         | 1,517       | 2,721        | 618              | 2,313         | 1,712            |              |
| 832   | 10,127      | 8,126          | 1,375         | 16,294         | 1,429        | 423               | 1,303            | 3,424              | 5,941          | 2,927           | 10,052          | 2,459          | 1,387            | 17                                      | 385                                   | 157             | 87,52              | 537                        | 765                               | 1,060                | 407                       | 7,459                                | 8,430        | 512               | 1,185             | 2,055         | 2,919       | 1,866        | 9,252            | 2,598         | 1,124            |              |
| 1,428 | 9,831       | 8,380          | 1,634         | 15,955         | 2,036        | 573               | 1,629            | 3,913              | 7,582          | 4,204           | 8,851           | 2,808          | 1,643            | 24                                      | 458                                   | 186             | 97,09              | 684                        | 1,133                             | 1,122                | 371                       | 12,012                               | 11,740       | 342               | 1,351             | 2,328         | 3,162       | 3,077        | 661              | 5,761         | 1,998            |              |
| 1,589 | 10,275      | 7,454          | 1,941         | 15,358         | 2,071        | 442               | 1,482            | 4,165              | 6,157          | 4,256           | 9,473           | 2,183          | 1,512            | 45                                      | 637                                   | 222             | 89,66              | 779                        | 1,421                             | 1,233                | 459                       | 9,963                                | 9,815        | 516               | 1,292             | 3,339         |             |              |                  |               |                  |              |

| 85               | 86            | 87                | 88               | 89              | 90          | 91               | 92                | 93          | 94             | 95               | 96               | 97                                           | 98                   | 99          | 100               | 101             | 102             | 103          | 104           | 105                                | 106         | 107           | 108         | 109                                                                                      |
|------------------|---------------|-------------------|------------------|-----------------|-------------|------------------|-------------------|-------------|----------------|------------------|------------------|----------------------------------------------|----------------------|-------------|-------------------|-----------------|-----------------|--------------|---------------|------------------------------------|-------------|---------------|-------------|------------------------------------------------------------------------------------------|
| いちご              | バナナ           | キウイフルーツ           | 食用油              | マーガリン           | 食塩          | しょう油             | みそ                | 砂糖          | 酢              | ソース              | ケチャップ            | マヨネーズ<br>↓<br>Mayonnaise & mayonnaise flavor | ドレッシング<br>マヨネーズ風味調味料 | ジャム         | カレールウ             | 緑茶              | 紅茶              | コーヒー         | 清酒            | 焼酎                                 | ビール         | ウイスキー         | ワイン         | 発泡酒・<br>ビール風味<br>アルコール飲料<br>↓<br>Low-malt beer &<br>beer-flavored<br>alcoholic beverages |
| Strawberry<br>1g | Bananas<br>1g | Kiwi fruits<br>1g | Edible oil<br>1g | Margarine<br>1g | Salt<br>1g  | Soy sauce<br>1ml | "Miso", soy<br>1g | Sugar<br>1g | Vinegar<br>1ml | Worcester<br>1ml | Tomato ket<br>1g |                                              |                      | Jam         | Instant cur<br>1g | Green tea<br>1g | Black tea<br>1g | Coffee<br>1g | "Sake"<br>1ml | "Shochu",<br>distilled spir<br>1ml | Beer<br>1l  | Whisky<br>1ml | Wine<br>1ml |                                                                                          |
| 数量<br>Quan.      | 数量<br>Quan.   | 数量<br>Quan.       | 数量<br>Quan.      | 数量<br>Quan.     | 数量<br>Quan. | 数量<br>Quan.      | 数量<br>Quan.       | 数量<br>Quan. | 数量<br>Quan.    | 数量<br>Quan.      | 数量<br>Quan.      | 数量<br>Quan.                                  | 数量<br>Quan.          | 数量<br>Quan. | 数量<br>Quan.       | 数量<br>Quan.     | 数量<br>Quan.     | 数量<br>Quan.  | 数量<br>Quan.   | 数量<br>Quan.                        | 数量<br>Quan. | 数量<br>Quan.   | 数量<br>Quan. | 数量<br>Quan.                                                                              |
| 2,242            | 18,448        | 2,339             | 8,368            | 917             | 1,769       | 4,981            | 5,194             | 4,736       | 2,180          | 1,458            | 1,531            | 2,520                                        | 2,391                | 1,109       | 1,441             | 798             | 173             | 2,478        | 6,640         | 9,245                              | 19.37       | 1,126         | 3,327       | 26.43                                                                                    |
| 902              | 17,563        | 2,350             | 8,890            | 680             | 904         | 5,172            | 5,285             | 3,004       | 2,082          | 1,130            | 1,739            | 2,581                                        | 1,874                | 879         | 1,541             | 778             | 127             | 3,208        | 9,490         | 7,868                              | 27.35       | 2,489         | 7,085       | 40.92                                                                                    |
| 2,224            | 17,252        | 2,192             | 10,006           | 1,000           | 3,661       | 5,770            | 6,553             | 4,584       | 2,848          | 1,621            | 1,428            | 2,776                                        | 2,223                | 1,372       | 1,558             | 369             | 97              | 2,691        | 9,988         | 12,507                             | 25.18       | 3,214         | 5,351       | 33.36                                                                                    |
| 2,771            | 18,816        | 3,101             | 8,308            | 958             | 1,916       | 6,182            | 7,316             | 3,690       | 2,531          | 1,067            | 1,556            | 2,626                                        | 2,276                | 1,122       | 1,715             | 829             | 171             | 2,480        | 7,165         | 10,076                             | 25.62       | 980           | 3,909       | 32.31                                                                                    |
| 2,533            | 17,815        | 2,594             | 7,960            | 768             | 1,808       | 4,808            | 5,085             | 5,290       | 1,889          | 1,333            | 1,382            | 2,039                                        | 2,106                | 966         | 1,502             | 994             | 272             | 2,429        | 9,028         | 7,473                              | 22.74       | 1,470         | 5,353       | 21.12                                                                                    |
| 2,119            | 17,868        | 2,488             | 8,089            | 834             | 1,608       | 5,957            | 7,875             | 4,750       | 2,146          | 977              | 1,271            | 2,334                                        | 1,835                | 1,040       | 1,429             | 1,038           | 168             | 2,323        | 12,203        | 11,329                             | 23.72       | 2,061         | 6,359       | 35.97                                                                                    |
| 1,921            | 18,180        | 1,991             | 8,609            | 533             | 2,715       | 6,270            | 7,142             | 4,899       | 2,006          | 1,130            | 1,175            | 2,651                                        | 2,138                | 955         | 1,428             | 518             | 152             | 2,523        | 6,120         | 7,303                              | 20.43       | 3,442         | 3,062       | 27.34                                                                                    |
| 2,889            | 17,961        | 2,317             | 8,287            | 637             | 762         | 3,565            | 6,583             | 4,403       | 3,205          | 1,094            | 1,187            | 2,322                                        | 2,263                | 1,347       | 1,203             | 739             | 130             | 2,057        | 10,419        | 6,663                              | 15.74       | 2,262         | 2,932       | 24.82                                                                                    |
| 2,878            | 17,749        | 1,965             | 8,026            | 669             | 1,612       | 6,189            | 5,295             | 4,504       | 1,428          | 984              | 1,560            | 2,828                                        | 2,326                | 959         | 1,420             | 791             | 129             | 2,782        | 5,256         | 2,907                              | 24.75       | 1,548         | 2,300       | 19.66                                                                                    |
| 2,927            | 18,973        | 2,451             | 7,369            | 604             | 1,911       | 4,673            | 3,782             | 3,737       | 2,347          | 1,215            | 1,483            | 1,947                                        | 2,348                | 777         | 1,329             | 745             | 194             | 2,534        | 7,414         | 8,738                              | 19.94       | 1,484         | 3,262       | 31.61                                                                                    |
| 2,921            | 18,482        | 2,578             | 8,472            | 726             | 1,883       | 4,853            | 4,380             | 6,984       | 2,742          | 1,332            | 1,333            | 2,146                                        | 2,944                | 1,012       | 1,197             | 649             | 257             | 2,040        | 10,798        | 9,695                              | 18.96       | 1,130         | 5,647       | 16.51                                                                                    |
| 2,549            | 17,843        | 3,027             | 9,636            | 985             | 1,589       | 5,617            | 5,554             | 3,261       | 2,478          | 1,346            | 1,578            | 2,377                                        | 2,697                | 1,359       | 1,582             | 852             | 463             | 2,444        | 6,051         | 7,557                              | 18.35       | 912           | 4,086       | 27.50                                                                                    |
| 3,119            | 18,261        | 3,206             | 8,622            | 907             | 1,295       | 4,433            | 4,616             | 2,887       | 2,189          | 1,317            | 1,555            | 2,299                                        | 2,806                | 1,300       | 1,437             | 1,208           | 229             | 2,475        | 8,642         | 11,175                             | 26.50       | 1,983         | 3,921       | 24.37                                                                                    |
| 3,010            | 15,836        | 2,956             | 6,940            | 894             | 1,241       | 3,762            | 4,140             | 3,530       | 2,133          | 1,244            | 1,422            | 2,215                                        | 2,568                | 1,322       | 1,251             | 825             | 318             | 2,714        | 6,041         | 6,990                              | 19.34       | 1,341         | 4,381       | 19.63                                                                                    |
| 2,644            | 20,432        | 3,393             | 6,868            | 921             | 1,553       | 4,305            | 4,279             | 3,956       | 1,784          | 1,231            | 1,069            | 2,137                                        | 2,737                | 1,484       | 1,197             | 854             | 265             | 2,914        | 5,147         | 8,370                              | 20.96       | 1,270         | 5,351       | 16.94                                                                                    |
| 1,990            | 18,236        | 3,055             | 7,965            | 896             | 2,136       | 5,771            | 6,469             | 4,331       | 2,554          | 1,173            | 1,616            | 2,764                                        | 2,173                | 1,044       | 1,896             | 819             | 113             | 2,737        | 12,140        | 11,118                             | 26.29       | 1,988         | 5,443       | 40.16                                                                                    |
| 2,240            | 18,870        | 4,229             | 8,211            | 1,188           | 1,565       | 6,412            | 7,279             | 3,857       | 1,969          | 1,377            | 1,709            | 2,678                                        | 2,403                | 1,068       | 1,472             | 845             | 222             | 3,011        | 9,539         | 9,760                              | 19.99       | 823           | 3,109       | 44.92                                                                                    |
| 1,297            | 17,678        | 2,139             | 6,161            | 1,032           | 2,029       | 5,016            | 4,414             | 3,766       | 1,529          | 1,165            | 1,603            | 2,628                                        | 2,784                | 1,168       | 1,627             | 1,039           | 78              | 3,308        | 6,471         | 7,310                              | 20.45       | 1,408         | 2,024       | 28.94                                                                                    |
| 2,086            | 18,775        | 1,924             | 7,025            | 822             | 1,327       | 3,590            | 5,212             | 3,424       | 1,587          | 1,451            | 1,401            | 2,173                                        | 1,956                | 725         | 1,413             | 774             | 145             | 1,907        | 6,774         | 5,361                              | 19.78       | 849           | 1,866       | 14.19                                                                                    |
| 2,290            | 17,585        | 1,734             | 6,919            | 798             | 2,218       | 4,893            | 4,176             | 3,577       | 1,782          | 928              | 1,525            | 2,126                                        | 2,884                | 1,120       | 1,391             | 663             | 254             | 2,276        | 5,466         | 9,037                              | 15.00       | 1,513         | 2,802       | 19.56                                                                                    |
| 2,054            | 17,359        | 2,138             | 8,638            | 868             | 3,508       | 4,869            | 9,172             | 6,760       | 2,114          | 1,136            | 1,497            | 2,491                                        | 2,725                | 1,492       | 1,392             | 636             | 153             | 2,330        | 7,440         | 10,090                             | 23.47       | 1,293         | 2,780       | 27.72                                                                                    |
| 2,791            | 20,340        | 2,331             | 8,292            | 846             | 1,078       | 5,366            | 6,222             | 4,514       | 2,023          | 1,444            | 1,792            | 2,853                                        | 2,087                | 1,163       | 1,340             | 753             | 168             | 2,288        | 3,598         | 7,532                              | 18.13       | 1,921         | 2,951       | 26.99                                                                                    |
| 2,884            | 17,278        | 1,859             | 7,945            | 747             | 1,494       | 6,395            | 5,199             | 4,237       | 1,491          | 1,431            | 1,659            | 2,604                                        | 2,283                | 989         | 1,246             | 2,333           | 200             | 2,154        | 8,057         | 7,352                              | 23.87       | 855           | 4,566       | 20.32                                                                                    |
| 2,617            | 22,159        | 2,761             | 7,179            | 1,174           | 1,284       | 4,857            | 5,305             | 3,462       | 2,896          | 1,654            | 1,872            | 2,581                                        | 2,247                | 1,107       | 1,590             | 901             | 171             | 2,335        | 5,530         | 6,847                              | 15.87       | 1,142         | 1,627       | 21.20                                                                                    |
| 3,224            | 21,609        | 3,323             | 7,719            | 700             | 1,134       | 5,355            | 7,149             | 4,070       | 3,152          | 1,384            | 1,661            | 2,524                                        | 1,820                | 1,242       | 1,237             | 1,407           | 122             | 2,348        | 6,748         | 9,659                              | 20.47       | 1,261         | 1,952       | 19.50                                                                                    |
| 2,081            | 22,972        | 2,664             | 7,997            | 1,138           | 1,435       | 5,814            | 4,036             | 6,004       | 1,742          | 2,065            | 1,670            | 2,218                                        | 2,773                | 1,073       | 1,355             | 916             | 145             | 2,784        | 6,558         | 8,281                              | 25.05       | 1,308         | 3,646       | 31.69                                                                                    |
| 1,553            | 19,795        | 2,483             | 7,776            | 972             | 1,105       | 5,437            | 4,011             | 4,596       | 1,188          | 2,506            | 1,606            | 2,409                                        | 2,372                | 1,154       | 1,278             | 912             | 248             | 3,835        | 6,304         | 10,087                             | 20.79       | 1,309         | 3,973       | 28.83                                                                                    |
| 2,142            | 19,095        | 1,907             | 9,929            | 1,117           | 1,431       | 4,557            | 4,167             | 4,166       | 1,706          | 1,799            | 1,797            | 2,590                                        | 2,307                | 1,054       | 1,465             | 738             | 163             | 2,871        | 7,300         | 8,448                              | 15.22       | 934           | 1,937       | 34.62                                                                                    |
| 1,410            | 18,209        | 2,987             | 6,645            | 1,106           | 1,383       | 3,538            | 3,930             | 4,723       | 1,907          | 2,143            | 1,687            | 1,859                                        | 2,293                | 1,001       | 1,045             | 629             | 367             | 2,671        | 5,468         | 4,946                              | 18.43       | 1,279         | 3,276       | 30.75                                                                                    |
| 2,724            | 22,422        | 3,211             | 8,463            | 1,007           | 1,338       | 5,400            | 4,545             | 5,505       | 2,140          | 1,922            | 1,545            | 2,527                                        | 2,577                | 1,344       | 1,486             | 905             | 225             | 3,040        | 6,271         | 6,095                              | 18.50       | 669           | 3,144       | 25.06                                                                                    |
| 2,119            | 21,839        | 1,860             | 8,392            | 969             | 1,620       | 4,802            | 8,038             | 6,050       | 3,395          | 1,659            | 1,604            | 2,656                                        | 2,276                | 924         | 1,292             | 819             | 274             | 2,435        | 9,126         | 8,490                              | 22.62       | 1,240         | 2,369       | 21.45                                                                                    |
| 2,225            | 22,218        | 2,224             | 9,750            | 1,293           | 1,617       | 6,360            | 5,500             | 6,031       | 1,136          | 1,666            | 1,685            | 3,250                                        | 2,315                | 916         | 1,910             | 627             | 122             | 3,037        | 4,724         | 5,275                              | 18.33       | 1,274         | 1,925       | 28.45                                                                                    |
| 2,416            | 16,838        | 2,244             | 8,325            | 719             | 1,555       | 4,879            | 4,576             | 5,745       | 2,233          | 1,335            | 1,500            | 2,411                                        | 3,241                | 1,185       | 1,561             | 792             | 154             | 2,416        | 6,200         | 9,863                              | 18.98       | 2,377         | 2,854       | 23.97                                                                                    |
| 2,099            | 17,484        | 1,848             | 6,339            | 911             | 2,654       | 5,620            | 3,846             | 3,664       | 2,382          | 1,930            | 1,615            | 2,312                                        | 2,430                | 968         | 1,155             | 623             | 97              | 2,969        | 8,620         | 8,788                              | 13.18       | 712           | 1,911       | 22.06                                                                                    |
| 2,430            | 23,527        | 1,492             | 8,682            | 1,193           | 1,727       | 5,263            | 4,687             | 4,284       | 1,725          | 2,371            | 1,403            | 2,478                                        | 2,101                | 976         | 1,270             | 720             | 100             | 3,041        | 7,111         | 12,702                             | 19.67       | 1,542         | 2,284       | 28.92                                                                                    |
| 2,938            | 17,586        | 1,305             | 9,573            | 1,055           | 1,810       | 4,347            | 5,422             | 4,065       | 1,521          | 1,526            | 1,195            | 2,508                                        | 2,147                | 1,012       | 1,614             | 656             | 79              | 2,853        | 3,931         | 16,020                             | 25.69       | 842           | 1,190       | 39.87                                                                                    |
| 2,315            | 14,453        | 1,837             | 9,136            | 760             | 1,302       | 4,253            | 4,661             | 4,819       | 1,581          | 1,789            | 1,587            | 2,716                                        | 1,966                | 924         | 1,420             | 782             | 183             | 2,515        | 6,866         | 7,294                              | 25.23       | 904           | 1,489       | 27.71                                                                                    |
| 1,979            | 20,319        | 1,886             | 12,641           | 963             | 1,418       | 5,266            | 4,138             | 5,584       | 1,887          | 1,959            | 1,786            | 2,334                                        | 2,369                | 956         | 1,601             | 570             | 215             | 3,097        | 5,976         | 8,307                              | 12.57       | 669           | 1,453       | 33.50                                                                                    |
| 1,815            | 16,510        | 1,805             | 10,866           | 761             | 1,820       | 3,791            | 4,934             | 5,822       | 2,278          | 1,874            | 1,499            | 2,626                                        | 2,119                | 867         | 1,375             | 737             | 54              | 2,328        | 6,450         | 10,391                             | 24.19       | 472           | 983         | 25.59                                                                                    |
| 2,559            | 15,342        | 1,742             | 8,484            | 711             | 1,686       | 5,023            | 4,872             | 4,732       | 2,128          | 1,592            | 1,502            | 2,291                                        | 2,192                | 839         | 1,290             | 662             | 131             | 2,368        | 4,245         | 9,920                              | 15.30       | 1,365         | 2,947       | 48.74                                                                                    |
| 2,197            | 16,061        | 2,380             | 7,380            | 856             | 1,601       | 4,188            | 4,439             | 3,537       | 1,965          | 1,215            | 1,955            | 2,848                                        | 2,425                | 849         | 1,245             | 828             | 219             | 2,463        | 4,627         | 6,239                              | 17.17       | 656           | 7,553       | 24.96                                                                                    |
| 2,651            | 17,030        | 1,698             | 9,850            | 784             | 1,454       | 5,455            | 6,086             | 4,779       | 2,265          | 1,085            | 2,063            | 2,919                                        | 2,564                | 886         | 1,428             | 905             | 150             | 2,757        | 5,574         | 9,278                              | 16.69       | 721           | 2,429       | 30.66                                                                                    |
| 2,899            | 20,430        | 2,832             | 8,767            | 998             | 1,437       | 5,862            | 6,005             | 7,000       | 3,052          | 1,123            | 1,371            | 2,619                                        | 2,461                | 921         | 1,187             | 1,180           | 114             | 2,679        | 5,092         | 9,486                              | 17.41       | 982           | 3,072       | 30.39                                                                                    |
| 1,840            | 14,759        | 1,840             | 9,011            | 883             | 1,882       | 4,147            | 6,316             | 4,373       | 1,713          | 1,273            | 1,899            | 2,700                                        | 2,583                | 781         | 1,379             | 848             | 85              | 1,770        | 3,864         | 13,880                             | 22.07       | 814           | 1,740       | 33.59                                                                                    |
| 2,424            | 20,513        | 2,247             | 10,114           | 751             | 2,124       | 5,510            | 5,098             | 5,648       | 3,552          | 889              | 1,788            | 2,481                                        | 2,239                | 1,032       | 1,158             | 810             | 174             | 2,500        | 4,311         | 15,650                             | 17.80       | 570           | 2,740       | 25.51                                                                                    |
| 1,727            | 15,917        | 1,952             | 8,555            | 598             | 1,736       | 5,060            | 6,524             | 5,507       | 2,564          | 1,274            | 1,504            | 2,820                                        | 2,851                | 719         | 1,439             | 713             | 160             | 1,554        | 2,754         | 21,393                             | 15.63       | 306           | 2,626       | 40.78                                                                                    |
| 2,379            |               |                   |                  |                 |             |                  |                   |             |                |                  |                  |                                              |                      |             |                   |                 |                 |              |               |                                    |             |               |             |                                                                                          |

Nutrient calculations

|       |                   |          |     |          |     | Weight    |     | Energy     | Energy          | Water         | Protein   |              | Fat                    |           | Fatty acids |              |                     | Cholesterol         | Carbohydrate    |             |                     |                            |
|-------|-------------------|----------|-----|----------|-----|-----------|-----|------------|-----------------|---------------|-----------|--------------|------------------------|-----------|-------------|--------------|---------------------|---------------------|-----------------|-------------|---------------------|----------------------------|
|       |                   | 朝食<br>間食 | 献立名 | 食品<br>番号 | 食品名 | 重量<br>(g) | 食品群 | 廃棄率<br>(%) | エネルギー<br>(kcal) | エネルギー<br>(kJ) | 水分<br>(g) | たんぱく質<br>(g) | アミノ酸組成<br>たんぱく質<br>(g) | 脂質<br>(g) | TG当量<br>(g) | 飽和脂肪酸<br>(g) | 一価不飽和<br>脂肪酸<br>(g) | 多価不飽和<br>脂肪酸<br>(g) | コレステロール<br>(mg) | 炭水化物<br>(g) | 利用可能<br>炭水化物<br>(g) | 低分子量<br>水溶性<br>食物繊維<br>(g) |
| 全国    | All Japan         | 総 合 計    | 0.0 | 0.0      | 0.0 | 674416.0  | 0.0 | 0.0        | 1027991.7       | 4300286.5     | 469216.5  | 33757.5      | 28463.3                | 41468.0   | 38614.3     | 12243.3      | 16545.8             | 8279.5              | 194285.0        | 115937.2    | 108571.5            | 564.6                      |
| 札幌市   | Sapporo-shi       | 総 合 計    | 0.0 | 0.0      | 0.0 | 718521.5  | 0.0 | 0.0        | 1116193.9       | 4669587.9     | 496009.6  | 35276.0      | 29665.7                | 42512.4   | 39759.8     | 12696.6      | 16960.1             | 8549.9              | 194244.3        | 129805.6    | 122969.1            | 553.4                      |
| 青森市   | Aomori-shi        | 総 合 計    | 0.0 | 0.0      | 0.0 | 737718.5  | 0.0 | 0.0        | 1135340.9       | 4749758.6     | 509021.3  | 37090.5      | 31273.7                | 44841.5   | 41379.2     | 12563.3      | 17802.0             | 9402.4              | 221823.5        | 128085.6    | 119304.7            | 532.2                      |
| 盛岡市   | Morioka-shi       | 総 合 計    | 0.0 | 0.0      | 0.0 | 769366.5  | 0.0 | 0.0        | 1139388.2       | 4766704.1     | 536831.7  | 37160.7      | 31350.8                | 42562.0   | 39569.5     | 12548.0      | 16672.2             | 8806.2              | 202731.1        | 136873.5    | 126571.4            | 569.2                      |
| 仙台市   | Sendai-shi        | 総 合 計    | 0.0 | 0.0      | 0.0 | 694245.0  | 0.0 | 0.0        | 1008011.7       | 4216887.7     | 492008.1  | 33650.4      | 28346.1                | 40686.4   | 37873.6     | 12373.5      | 15903.3             | 8023.1              | 194085.3        | 113359.0    | 104547.4            | 523.4                      |
| 秋田市   | Akita-shi         | 総 合 計    | 0.0 | 0.0      | 0.0 | 720690.0  | 0.0 | 0.0        | 1022686.8       | 4278578.4     | 516768.4  | 35108.8      | 29458.1                | 41275.5   | 38359.3     | 12185.3      | 16331.0             | 8344.9              | 215491.0        | 110649.2    | 99496.2             | 490.3                      |
| 山形市   | Yamagata-shi      | 総 合 計    | 0.0 | 0.0      | 0.0 | 675686.5  | 0.0 | 0.0        | 1027403.7       | 4298490.9     | 468456.8  | 33258.8      | 28149.1                | 40568.8   | 37731.5     | 11725.6      | 16200.6             | 8326.9              | 196059.6        | 117757.9    | 109210.0            | 499.6                      |
| 福島市   | Fukushima-shi     | 総 合 計    | 0.0 | 0.0      | 0.0 | 642409.0  | 0.0 | 0.0        | 963650.2        | 4031562.1     | 449180.0  | 30892.4      | 26129.2                | 37572.1   | 35032.2     | 10905.6      | 14760.8             | 7992.8              | 183040.2        | 112043.4    | 103966.8            | 475.8                      |
| 水戸市   | Mito-shi          | 総 合 計    | 0.0 | 0.0      | 0.0 | 664416.5  | 0.0 | 0.0        | 958219.3        | 4008572.4     | 471987.7  | 32587.9      | 27687.3                | 39544.9   | 36780.4     | 8175.7       | 15803.3             | 7157.2              | 188140.2        | 107387.2    | 98828.9             | 517.4                      |
| 宇都宮市  | Utsunomiya-shi    | 総 合 計    | 0.0 | 0.0      | 0.0 | 682570.0  | 0.0 | 0.0        | 1000867.4       | 4187069.0     | 479105.6  | 32573.0      | 27474.6                | 37392.9   | 34758.7     | 11241.5      | 14583.6             | 7590.6              | 180382.1        | 119168.9    | 112000.1            | 547.1                      |
| 前橋市   | Maebashi-shi      | 総 合 計    | 0.0 | 0.0      | 0.0 | 648705.5  | 0.0 | 0.0        | 978789.3        | 4095006.9     | 448068.2  | 30497.3      | 25699.3                | 35676.1   | 33237.1     | 10084.3      | 13954.0             | 7914.9              | 161810.7        | 120103.6    | 113063.8            | 504.1                      |
| さいたま市 | Saitama-shi       | 総 合 計    | 0.0 | 0.0      | 0.0 | 709667.0  | 0.0 | 0.0        | 1068043.5       | 4468002.4     | 497756.9  | 35141.4      | 29527.6                | 44567.0   | 41655.1     | 13254.0      | 17725.3             | 9030.2              | 192146.2        | 118174.3    | 109718.1            | 578.5                      |
| 千葉市   | Chiba-shi         | 総 合 計    | 0.0 | 0.0      | 0.0 | 735125.5  | 0.0 | 0.0        | 1047869.6       | 4383538.3     | 527753.3  | 35451.0      | 29764.1                | 43336.0   | 40365.2     | 13057.0      | 17079.8             | 8636.6              | 192400.2        | 137360.1    | 104373.8            | 630.8                      |
| 東京都西部 | Ku-areas of Tokyo | 総 合 計    | 0.0 | 0.0      | 0.0 | 6598300.0 | 0.0 | 0.0        | 953164.3        | 3987257.5     | 470814.5  | 32301.2      | 27123.7                | 39808.5   | 37098.1     | 12216.2      | 15874.5             | 7543.2              | 174142.0        | 104350.7    | 96893.2             | 582.1                      |
| 横浜市   | Yokohama-shi      | 総 合 計    | 0.0 | 0.0      | 0.0 | 676612.0  | 0.0 | 0.0        | 962442.6        | 4026071.5     | 484288.5  | 32648.1      | 27416.6                | 39547.4   | 36815.5     | 12223.7      | 15606.0             | 7530.9              | 177233.2        | 106868.6    | 98770.7             | 567.7                      |
| 新潟市   | Niigata-shi       | 総 合 計    | 0.0 | 0.0      | 0.0 | 790851.5  | 0.0 | 0.0        | 1120659.0       | 4688082.3     | 565270.8  | 37551.7      | 31673.6                | 43489.3   | 40517.8     | 13172.0      | 16997.1             | 8746.1              | 205647.3        | 126805.2    | 116601.9            | 644.7                      |
| 富山市   | Toyama-shi        | 総 合 計    | 0.0 | 0.0      | 0.0 | 759788.0  | 0.0 | 0.0        | 1120016.5       | 4685200.1     | 534094.9  | 37357.2      | 31533.2                | 42992.5   | 39826.2     | 12696.5      | 16836.9             | 8754.8              | 221677.0        | 129415.4    | 120151.0            | 627.6                      |
| 金沢市   | Kanazawa-shi      | 総 合 計    | 0.0 | 0.0      | 0.0 | 665579.0  | 0.0 | 0.0        | 986066.3        | 4124613.1     | 472445.8  | 33865.5      | 28593.9                | 40796.2   | 37693.9     | 12495.7      | 16281.7             | 7602.9              | 177492.4        | 107577.0    | 99836.3             | 594.8                      |
| 福井市   | Fukui-shi         | 総 合 計    | 0.0 | 0.0      | 0.0 | 607929.5  | 0.0 | 0.0        | 979995.2        | 4099512.0     | 409193.6  | 31563.0      | 26589.0                | 37149.3   | 34459.1     | 11009.2      | 14843.9             | 7262.0              | 180147.3        | 118506.9    | 112642.6            | 517.3                      |
| 甲府市   | Kofu-shi          | 総 合 計    | 0.0 | 0.0      | 0.0 | 606644.5  | 0.0 | 0.0        | 906694.2        | 3792940.4     | 424228.0  | 30183.6      | 25391.3                | 36431.7   | 34004.5     | 10841.4      | 14459.5             | 7397.4              | 157460.6        | 102345.0    | 95467.9             | 531.6                      |
| 長野市   | Nagano-shi        | 総 合 計    | 0.0 | 0.0      | 0.0 | 689421.5  | 0.0 | 0.0        | 1014701.9       | 4244660.7     | 482897.4  | 33297.5      | 28189.6                | 39949.5   | 37216.2     | 11805.7      | 15515.8             | 8426.4              | 190066.7        | 116533.4    | 106604.1            | 520.8                      |
| 岐阜市   | Gifu-shi          | 総 合 計    | 0.0 | 0.0      | 0.0 | 669655.2  | 0.0 | 0.0        | 1029025.0       | 4304554.3     | 462858.7  | 33272.3      | 28125.6                | 40171.1   | 37325.0     | 11635.3      | 15931.3             | 8314.4              | 191320.2        | 120570.8    | 113077.7            | 625.2                      |
| 静岡市   | Shizuoka-shi      | 総 合 計    | 0.0 | 0.0      | 0.0 | 701199.5  | 0.0 | 0.0        | 1115375.2       | 4666041.8     | 474542.9  | 37021.3      | 30841.9                | 41713.8   | 38872.3     | 12461.7      | 16438.1             | 8506.4              | 189451.8        | 133667.4    | 126443.3            | 617.2                      |
| 名古屋市  | Nagoya-shi        | 総 合 計    | 0.0 | 0.0      | 0.0 | 675407.0  | 0.0 | 0.0        | 1039425.7       | 4347879.3     | 466172.7  | 34537.9      | 29149.5                | 40815.1   | 37978.4     | 12372.6      | 16128.0             | 8007.0              | 195881.7        | 121312.7    | 114398.5            | 686.1                      |
| 津市    | Tsu-shi           | 総 合 計    | 0.0 | 0.0      | 0.0 | 668012.5  | 0.0 | 0.0        | 992814.1        | 4153426.8     | 468524.0  | 33792.2      | 28363.4                | 40617.0   | 37815.2     | 12064.7      | 16251.2             | 8021.8              | 204825.0        | 109409.4    | 100491.7            | 510.2                      |
| 大津市   | Otsu-shi          | 総 合 計    | 0.0 | 0.0      | 0.0 | 758935.5  | 0.0 | 0.0        | 1138507.2       | 4762751.5     | 529902.3  | 37675.7      | 31693.6                | 44318.8   | 41051.4     | 13176.7      | 17738.0             | 8516.2              | 215319.5        | 132193.0    | 124220.4            | 616.0                      |
| 京都市   | Kyoto-shi         | 総 合 計    | 0.0 | 0.0      | 0.0 | 716636.5  | 0.0 | 0.0        | 1022822.1       | 4278707.7     | 511966.5  | 34426.4      | 28887.0                | 40765.1   | 37797.5     | 12055.8      | 16266.4             | 7983.8              | 195999.9        | 115205.9    | 106923.7            | 636.5                      |
| 大阪市   | Osaka-shi         | 総 合 計    | 0.0 | 0.0      | 0.0 | 709259.0  | 0.0 | 0.0        | 1100733.1       | 4604468.6     | 482161.8  | 35831.8      | 30176.6                | 45815.6   | 42614.1     | 13290.1      | 18520.1             | 9127.9              | 213192.1        | 121765.3    | 114950.1            | 603.6                      |
| 神戸市   | Kobe-shi          | 総 合 計    | 0.0 | 0.0      | 0.0 | 656963.5  | 0.0 | 0.0        | 993987.0        | 4157743.5     | 458110.2  | 32860.7      | 27715.2                | 39326.9   | 36540.8     | 12179.9      | 15634.6             | 7282.5              | 187443.6        | 114456.0    | 108344.9            | 541.8                      |
| 奈良市   | Nara-shi          | 総 合 計    | 0.0 | 0.0      | 0.0 | 717805.5  | 0.0 | 0.0        | 1044528.9       | 4369496.6     | 509629.4  | 34707.4      | 29172.2                | 43301.4   | 40161.4     | 12745.4      | 17394.9             | 8430.8              | 203138.7        | 117098.3    | 108794.6            | 627.6                      |
| 和歌山市  | Wakayama-shi      | 総 合 計    | 0.0 | 0.0      | 0.0 | 683172.0  | 0.0 | 0.0        | 1073047.4       | 4488579.4     | 468266.4  | 34657.2      | 29131.1                | 42423.7   | 39375.0     | 12326.6      | 17127.6             | 8371.6              | 205199.3        | 123780.3    | 115802.9            | 569.5                      |
| 鳥取市   | Tottori-shi       | 総 合 計    | 0.0 | 0.0      | 0.0 | 722481.5  | 0.0 | 0.0        | 1125026.7       | 4705909.1     | 499568.7  | 38112.9      | 32200.8                | 47014.2   | 43637.5     | 13476.2      | 18894.0             | 9548.1              | 242220.0        | 124553.3    | 117416.8            | 634.4                      |
| 松江市   | Matsue-shi        | 総 合 計    | 0.0 | 0.0      | 0.0 | 679572.5  | 0.0 | 0.0        | 1021357.3       | 4272492.4     | 477506.9  | 34272.9      | 28879.5                | 42494.6   | 39533.5     | 12607.9      | 16908.1             | 8434.1              | 199715.8        | 111106.5    | 103533.7            | 596.6                      |
| 岡山市   | Okayama-shi       | 総 合 計    | 0.0 | 0.0      | 0.0 | 633005.0  | 0.0 | 0.0        | 924470.9        | 3867118.5     | 447652.9  | 31156.4      | 26348.8                | 37821.4   | 34973.9     | 11345.7      | 15030.0             | 7212.5              | 181496.7        | 102528.2    | 95877.0             | 558.2                      |
| 広島市   | Hiroshima-shi     | 総 合 計    | 0.0 | 0.0      | 0.0 | 708114.5  | 0.0 | 0.0        | 1051705.6       | 4399462.4     | 500766.7  | 34253.9      | 28918.6                | 38191.8   | 40743.8     | 12953.7      | 17597.0             | 8572.2              | 204677.1        | 114347.6    | 106768.7            | 610.6                      |
| 山口市   | Yamaguchi-shi     | 総 合 計    | 0.0 | 0.0      | 0.0 | 700310.0  | 0.0 | 0.0        | 1060861.6       | 4437695.6     | 492912.3  | 34711.5      | 29356.5                | 44829.7   | 41706.3     | 13030.1      | 18023.7             | 8998.5              | 216005.6        | 112455.6    | 104783.3            | 578.2                      |
| 徳島市   | Tokushima-shi     | 総 合 計    | 0.0 | 0.0      | 0.0 | 627944.5  | 0.0 | 0.0        | 951234.0        | 3979235.8     | 439650.3  | 30521.2      | 25756.0                | 39352.4   | 36591.8     | 11166.5      | 15735.7             | 8243.2              | 177823.4        | 105794.2    | 98567.1             | 535.9                      |
| 高松市   | Takamatsu-shi     | 総 合 計    | 0.0 | 0.0      | 0.0 | 714582.0  | 0.0 | 0.0        | 1128999.0       | 4722493.8     | 492384.9  | 36029.6      | 30451.4                | 47932.6   | 44667.1     | 13380.9      | 19250.9             | 10258.8             | 173828.7        | 124567.1    | 117437.0            | 639.2                      |
| 松山市   | Matsuyama-shi     | 総 合 計    | 0.0 | 0.0      | 0.0 | 634913.5  | 0.0 | 0.0        | 1017394.0       | 4256041.6     | 436603.2  | 32587.0      | 27533.9                | 44000.5   | 41011.0     | 12204.3      | 17913.9             | 9259.1              | 201525.4        | 108479.5    | 101850.9            | 522.6                      |
| 高知市   | Kochi-shi         | 総 合 計    | 0.0 | 0.0      | 0.0 | 646429.5  | 0.0 | 0.0        | 1008774.0       | 4219709.5     | 447144.4  | 34054.4      | 28614                  |           |             |              |                     |                     |                 |             |                     |                            |

| Dietary fibers             |                    |                   | Ash<br>灰分<br>(g) | Salt<br>食塩<br>相当量<br>(g) | Na<br>ナトリウム<br>(mg) | K<br>カリウム<br>(mg) | Ca<br>カルシウム<br>(mg) | Mg<br>マグネシウム<br>(mg) | P<br>リン<br>(mg) | Fe<br>鉄<br>(mg) | Zn<br>亜鉛<br>(mg) | Cu<br>銅<br>(mg) | Mn<br>マンガン<br>(mg) | I<br>ヨウ素<br>(μg) | Se<br>セレン<br>(μg) | Cr<br>クロム<br>(μg) | Mo<br>モリブデン<br>(μg) | Vitamin A     |                |                |                         |                      |
|----------------------------|--------------------|-------------------|------------------|--------------------------|---------------------|-------------------|---------------------|----------------------|-----------------|-----------------|------------------|-----------------|--------------------|------------------|-------------------|-------------------|---------------------|---------------|----------------|----------------|-------------------------|----------------------|
| 高分子量<br>水溶性<br>食物繊維<br>(g) | 不溶性<br>食物繊維<br>(g) | 食物繊維<br>総量<br>(g) |                  |                          |                     |                   |                     |                      |                 |                 |                  |                 |                    |                  |                   |                   |                     | レチノール<br>(μg) | α-カロテン<br>(μg) | β-カロテン<br>(μg) | β-クリプト<br>キサンチン<br>(μg) | β-カロテン<br>当量<br>(μg) |
| 1657.7                     | 4896.4             | 7562.0            | 8605.4           | 5162.0                   | 2043644.4           | 1151313.2         | 237266.4            | 116902.5             | 482454.9        | 3613.0          | 3974.1           | 477.5           | 1748.5             | 729233.9         | 42537.2           | 3535.1            | 95061.2             | 127686.6      | 272698.8       | 1241954.4      | 192604.1                | 1590714.7            |
| 1778.2                     | 5029.5             | 7646.8            | 7690.2           | 4181.1                   | 1658685.2           | 1172098.3         | 223629.2            | 117427.8             | 505995.7        | 3583.3          | 4187.7           | 509.5           | 1877.6             | 650428.9         | 44398.5           | 3565.3            | 102761.9            | 143104.8      | 254103.3       | 1138679.0      | 198192.0                | 1479518.8            |
| 1664.8                     | 5013.6             | 8090.7            | 7806.0           | 7606.0                   | 3003496.5           | 1226843.5         | 237891.2            | 130949.5             | 529028.8        | 3895.8          | 4372.0           | 528.1           | 1651.4             | 1419666.6        | 50815.2           | 3998.5            | 107478.8            | 147166.4      | 273835.8       | 1273835.8      | 166129.3                | 1558446.5            |
| 1921.2                     | 5862.3             | 9285.0            | 10005.1          | 6083.1                   | 2408910.5           | 1320404.9         | 269894.2            | 137965.2             | 541047.7        | 4081.8          | 4351.8           | 552.8           | 1976.7             | 1437021.7        | 46330.2           | 4058.3            | 112636.6            | 154513.3      | 337754.4       | 1483006.9      | 215584.5                | 1882075.3            |
| 1702.4                     | 5179.5             | 8174.3            | 9010.5           | 5381.1                   | 2131524.6           | 1216266.5         | 261507.6            | 122825.1             | 496200.7        | 3664.6          | 3948.1           | 477.5           | 1849.3             | 1037924.2        | 43551.1           | 3612.1            | 92395.8             | 150121.3      | 287987.2       | 1364742.4      | 179925.9                | 1742845.4            |
| 1733.6                     | 5491.3             | 8495.2            | 9255.9           | 5596.0                   | 2217062.2           | 1246676.9         | 246909.1            | 125675.7             | 503903.7        | 3871.0          | 3973.9           | 481.9           | 1850.9             | 1052293.6        | 46723.7           | 3909.3            | 90846.6             | 151615.1      | 286384.4       | 1425819.3      | 172766.5                | 1801987.5            |
| 1588.4                     | 4822.9             | 7450.3            | 9938.2           | 6467.4                   | 2557268.7           | 1158547.2         | 237839.4            | 119787.6             | 482911.0        | 3625.7          | 3966.5           | 483.4           | 1613.0             | 1086357.4        | 42017.6           | 3442.2            | 93414.6             | 144230.3      | 266175.2       | 1230624.6      | 202120.5                | 1544339.0            |
| 1558.8                     | 4731.0             | 7290.8            | 7287.8           | 4010.6                   | 1592921.8           | 1098591.3         | 223583.3            | 112133.5             | 453508.4        | 3447.2          | 3673.4           | 463.8           | 1657.8             | 860221.0         | 38970.1           | 3322.1            | 93970.4             | 135352.3      | 269723.4       | 1199823.1      | 153639.8                | 1519101.7            |
| 1632.0                     | 4827.8             | 7663.9            | 8744.9           | 5265.9                   | 2085240.3           | 1178270.2         | 242976.7            | 118133.0             | 478008.9        | 3568.5          | 3720.0           | 450.7           | 1656.7             | 966609.9         | 43448.9           | 3586.4            | 86835.1             | 147597.9      | 278718.5       | 1280582.9      | 203970.5                | 1636085.5            |
| 1613.9                     | 4856.7             | 7526.5            | 8596.2           | 5122.1                   | 2028520.4           | 1150536.3         | 243941.3            | 119478.6             | 478527.9        | 3537.8          | 3876.3           | 486.0           | 1776.0             | 756937.0         | 41192.6           | 3362.2            | 101265.9            | 147219.3      | 321197.5       | 1343108.1      | 196172.6                | 1711947.8            |
| 1612.0                     | 4789.9             | 7526.2            | 8521.7           | 5171.9                   | 2047973.2           | 1125465.5         | 225830.6            | 117019.2             | 452103.8        | 3508.8          | 3683.7           | 482.7           | 1738.8             | 1034316.8        | 38508.4           | 3524.8            | 100486.6            | 128153.1      | 264974.6       | 121259.4       | 1424234.5               | 1649223.6            |
| 1835.9                     | 5427.5             | 8314.0            | 8966.6           | 5265.7                   | 2086214.3           | 1247648.3         | 257896.8            | 122940.8             | 509561.2        | 3792.8          | 4188.0           | 501.6           | 1889.1             | 782585.3         | 43783.0           | 3938.2            | 97010.6             | 151823.7      | 304759.3       | 1411531.1      | 184458.3                | 1747267.8            |
| 1882.3                     | 5559.5             | 8597.7            | 8605.8           | 4758.1                   | 1887764.3           | 1282839.7         | 278917.9            | 12798.9              | 518703.9        | 3890.1          | 4155.5           | 501.9           | 2015.2             | 611238.7         | 44703.9           | 3846.4            | 96165.7             | 158201.5      | 321362.0       | 1549583.4      | 176126.5                | 1970856.7            |
| 1746.3                     | 5086.9             | 7648.0            | 7762.6           | 4312.7                   | 1710590.3           | 1160399.3         | 242126.7            | 113806.9             | 467464.6        | 3472.9          | 3802.2           | 453.2           | 1702.0             | 656919.9         | 40308.6           | 3510.8            | 86305.3             | 139938.7      | 281629.5       | 1370766.6      | 185926.3                | 1727342.0            |
| 1767.1                     | 5122.0             | 7962.5            | 8295.8           | 4747.3                   | 1881076.7           | 1196537.7         | 252119.5            | 117453.1             | 478178.8        | 3480.8          | 3815.6           | 458.5           | 1714.0             | 824610.9         | 41431.6           | 3551.4            | 85278.4             | 143020.8      | 304692.5       | 141660.4       | 220944.0                | 1805815.2            |
| 1878.1                     | 5647.1             | 8791.3            | 10121.8          | 6100.6                   | 2415968.8           | 1343463.7         | 280843.9            | 137143.2             | 548163.6        | 4052.6          | 4343.1           | 539.2           | 1921.1             | 1038046.5        | 46881.8           | 3950.2            | 106355.2            | 150369.0      | 322600.5       | 1527994.4      | 223868.1                | 1920081.2            |
| 1767.8                     | 5422.5             | 8317.2            | 9425.1           | 5585.0                   | 2211638.8           | 1278911.7         | 265267.8            | 132352.4             | 540210.2        | 4063.3          | 4403.2           | 541.7           | 1959.9             | 1068395.0        | 48605.6           | 3955.8            | 111337.1            | 162617.3      | 256594.5       | 1325303.4      | 205216.0                | 1679808.5            |
| 1584.1                     | 4765.9             | 7440.7            | 8944.5           | 5533.5                   | 2189492.5           | 1140573.6         | 240326.0            | 115799.4             | 479549.7        | 3506.8          | 3911.7           | 455.8           | 1771.6             | 1139596.0        | 44836.3           | 3554.4            | 89440.1             | 137778.7      | 286822.3       | 1186825.2      | 125851.4                | 1533396.3            |
| 1538.9                     | 4585.1             | 7231.2            | 7674.3           | 4495.8                   | 1780195.5           | 1063085.4         | 211078.8            | 111065.1             | 449494.3        | 3401.8          | 3904.5           | 477.8           | 1737.2             | 893726.8         | 39848.4           | 3330.2            | 97298.0             | 125245.1      | 247087.7       | 1110028.9      | 198285.2                | 1448115.0            |
| 1566.2                     | 4535.4             | 7126.5            | 8605.5           | 5417.4                   | 2143409.2           | 1071030.9         | 217536.9            | 109757.4             | 434433.9        | 3311.5          | 3509.9           | 435.3           | 1583.9             | 546728.4         | 38859.3           | 5302.2            | 85804.4             | 135057.2      | 265201.8       | 1252026.3      | 171534.8                | 1568711.1            |
| 1679.8                     | 5056.8             | 7953.1            | 11098.6          | 7375.7                   | 2912818.6           | 1178144.9         | 264318.2            | 119196.1             | 490839.5        | 3597.8          | 3789.2           | 481.1           | 1575.0             | 1215531.9        | 44688.7           | 3608.7            | 89430.0             | 149458.0      | 269391.2       | 1277083.4      | 182320.2                | 1598956.8            |
| 1660.9                     | 5089.1             | 7742.3            | 7954.5           | 4502.2                   | 1784660.5           | 1158024.3         | 234420.4            | 119336.2             | 478810.1        | 3735.7          | 3993.0           | 497.3           | 1822.8             | 696088.0         | 42191.3           | 3591.7            | 103588.6            | 145063.9      | 238687.9       | 1197816.2      | 173385.9                | 1513760.2            |
| 1814.7                     | 5814.3             | 8874.8            | 8951.9           | 5189.2                   | 2055938.1           | 1256967.8         | 254613.3            | 134045.5             | 525983.7        | 4255.7          | 4407.1           | 559.8           | 2836.7             | 918842.6         | 46218.6           | 3919.8            | 115242.3            | 170456.8      | 301397.5       | 1324093.5      | 272085.1                | 1926767.1            |
| 1780.5                     | 5300.8             | 8054.6            | 8264.4           | 4728.9                   | 1873330.7           | 1175712.6         | 246977.0            | 119491.0             | 494551.4        | 3742.9          | 4094.7           | 499.4           | 1885.8             | 379346.6         | 43407.4           | 3626.3            | 101547.7            | 149457.7      | 292379.7       | 1300582.3      | 145229.8                | 1652011.1            |
| 1642.4                     | 5115.8             | 7748.3            | 8238.0           | 4732.9                   | 1874895.9           | 1178939.6         | 244753.2            | 118286.1             | 484087.0        | 3775.5          | 3945.9           | 473.1           | 2002.8             | 614765.5         | 42418.4           | 3604.2            | 88507.7             | 156333.1      | 271175.2       | 1248476.4      | 252444.9                | 1704010.1            |
| 1930.2                     | 5571.2             | 8595.1            | 9110.3           | 5196.7                   | 2059413.8           | 1324186.2         | 255838.1            | 131370.6             | 532162.5        | 3992.8          | 4429.2           | 533.1           | 1978.4             | 1114869.2        | 47860.9           | 3943.0            | 104013.1            | 148276.0      | 317105.0       | 1516460.2      | 256160.4                | 1934733.1            |
| 1861.3                     | 5353.1             | 8304.2            | 8391.6           | 4728.6                   | 1874527.6           | 1232360.4         | 249277.4            | 123153.1             | 491595.6        | 3699.5          | 3988.1           | 487.3           | 1845.5             | 812498.6         | 44457.4           | 3899.9            | 92111.2             | 139208.2      | 272648.3       | 134996.6       | 188671.0                | 1713562.9            |
| 1729.4                     | 5012.7             | 7796.1            | 8420.5           | 4814.6                   | 1906933.1           | 1202049.9         | 246768.2            | 120571.8             | 507732.4        | 3710.9          | 4311.1           | 498.1           | 1773.2             | 933289.0         | 45248.2           | 3589.9            | 98137.7             | 150378.0      | 262280.7       | 1250525.5      | 157727.2                | 1568954.1            |
| 1526.1                     | 4581.2             | 6902.8            | 7649.8           | 4333.0                   | 1716396.2           | 1090270.2         | 237028.5            | 109459.6             | 471257.4        | 3328.7          | 3931.8           | 460.9           | 1639.9             | 526887.4         | 40620.6           | 3246.9            | 91894.7             | 140550.8      | 241645.8       | 1121767.1      | 35789.5                 | 1406957.9            |
| 1881.5                     | 5431.8             | 8295.4            | 8561.2           | 4861.9                   | 1926675.0           | 1248778.8         | 253842.2            | 122799.1             | 499791.5        | 3743.9          | 4100.0           | 493.8           | 1847.2             | 717153.3         | 43533.0           | 3802.2            | 93461.5             | 143754.2      | 284027.3       | 1345545.5      | 251020.6                | 1743525.8            |
| 1720.3                     | 5118.0             | 7776.6            | 8604.1           | 5173.3                   | 2047708.0           | 1159399.8         | 228072.9            | 116534.2             | 483496.9        | 3689.3          | 4081.2           | 491.2           | 1799.4             | 683625.1         | 43282.8           | 3551.1            | 94390.7             | 143235.2      | 226861.9       | 1091808.9      | 224875.6                | 1433936.4            |
| 1673.8                     | 4969.6             | 7607.2            | 9049.5           | 5416.5                   | 2142207.6           | 1208192.5         | 248592.4            | 124175.6             | 526999.4        | 3876.3          | 4460.9           | 517.2           | 1713.5             | 436568.2         | 52920.1           | 3587.3            | 101147.8            | 157735.0      | 294754.3       | 1253439.8      | 190317.9                | 1588652.3            |
| 1715.2                     | 4947.7             | 7737.8            | 8462.7           | 4958.9                   | 1964249.2           | 1174485.4         | 251094.6            | 116968.1             | 485510.8        | 3654.1          | 3966.5           | 469.6           | 1715.3             | 926217.7         | 43841.3           | 3612.7            | 90071.7             | 137405.4      | 310429.2       | 1337670.9      | 148023.4                | 1682940.9            |
| 1571.4                     | 4421.8             | 6758.4            | 9152.1           | 5967.0                   | 2357724.4           | 1060689.3         | 220739.0            | 105891.4             | 438031.6        | 3191.6          | 3582.1           | 422.2           | 1495.6             | 422733.9         | 38831.5           | 3165.4            | 83683.6             | 127095.4      | 275083.7       | 1140867.5      | 171051.1                | 1455579.4            |
| 1688.8                     | 4886.5             | 7423.1            | 8624.9           | 5107.8                   | 2021940.9           | 1177726.3         | 242530.6            | 119220.7             | 485083.5        | 3611.7          | 4186.9           | 488.0           | 1688.2             | 487786.4         | 42624.4           | 3451.7            | 94611.9             | 138714.4      | 285561.0       | 1242459.2      | 235034.9                | 1606278.9            |
| 1614.3                     | 4662.7             | 717               |                  |                          |                     |                   |                     |                      |                 |                 |                  |                 |                    |                  |                   |                   |                     |               |                |                |                         |                      |

| レチノール<br>活性当量<br>(μg) | Vitamin D     | Vitamin E             |                       |                       |                       | Vitamin K     | Vitamin B                  |                            |               |                 |                            |                             | 葉酸<br>(μg) | パントテン酸<br>(mg) | ビオチン<br>(μg) | Vitamin C     | アルコール<br>(g) | 硝酸イオン<br>(g) | テオブロミン<br>(g) | カフェイン<br>(g) | タンニン<br>(g) | ポリフェノール<br>(g) |
|-----------------------|---------------|-----------------------|-----------------------|-----------------------|-----------------------|---------------|----------------------------|----------------------------|---------------|-----------------|----------------------------|-----------------------------|------------|----------------|--------------|---------------|--------------|--------------|---------------|--------------|-------------|----------------|
|                       | ビタミンD<br>(μg) | α-<br>トコフェロール<br>(mg) | β-<br>トコフェロール<br>(mg) | γ-<br>トコフェロール<br>(mg) | δ-<br>トコフェロール<br>(mg) | ビタミンK<br>(μg) | ビタミンB <sub>1</sub><br>(mg) | ビタミンB <sub>2</sub><br>(mg) | ナイアシン<br>(mg) | ナイアシン当量<br>(mg) | ビタミンB <sub>6</sub><br>(mg) | ビタミンB <sub>12</sub><br>(μg) |            |                |              | ビタミンC<br>(mg) |              |              |               |              |             |                |
| 259898.2              | 4306.2        | 5846.0                | 248.7                 | 7753.0                | 1499.1                | 122994.5      | 494.0                      | 525.1                      | 8001.4        | 14896.5         | 669.1                      | 2983.8                      | 144926.3   | 2746.2         | 20651.4      | 54071.5       | 5328.8       | 58.0         | 0.0           | 44.2         | 209.5       | 0.7            |
| 266007.1              | 4882.8        | 5806.9                | 247.5                 | 7635.9                | 1434.4                | 110818.7      | 515.4                      | 523.5                      | 8766.9        | 15927.0         | 716.9                      | 3050.7                      | 144436.3   | 2893.0         | 20741.2      | 53662.4       | 7109.6       | 59.1         | 0.0           | 48.5         | 227.4       | 0.8            |
| 276645.1              | 5984.3        | 6346.6                | 234.6                 | 8805.8                | 1711.8                | 133040.0      | 531.3                      | 560.0                      | 9110.0        | 16622.9         | 724.5                      | 3951.5                      | 149556.2   | 2903.4         | 23448.6      | 54904.6       | 7817.5       | 58.6         | 0.0           | 33.9         | 152.8       | 1.0            |
| 310963.1              | 5181.6        | 6314.6                | 259.6                 | 7926.2                | 1567.0                | 146169.5      | 544.5                      | 572.3                      | 8717.4        | 16320.6         | 754.0                      | 3377.6                      | 165005.4   | 3024.3         | 23154.9      | 62095.2       | 6072.5       | 64.5         | 0.0           | 44.9         | 213.4       | 0.9            |
| 294950.9              | 4507.6        | 5971.3                | 254.3                 | 7265.9                | 1423.7                | 137073.1      | 504.1                      | 547.6                      | 7862.7        | 14750.9         | 673.3                      | 3211.3                      | 153355.4   | 2781.2         | 21645.9      | 57798.3       | 5460.6       | 61.4         | 0.0           | 51.2         | 244.2       | 0.6            |
| 301429.1              | 5257.1        | 6417.7                | 255.4                 | 7507.7                | 1469.1                | 147201.2      | 524.7                      | 566.4                      | 8782.3        | 15904.2         | 712.2                      | 3593.3                      | 164373.5   | 2839.2         | 23278.5      | 61564.6       | 7616.7       | 66.5         | 0.0           | 48.3         | 234.7       | 1.1            |
| 272484.9              | 4342.0        | 5723.7                | 234.3                 | 7806.2                | 1546.2                | 120295.3      | 480.0                      | 521.7                      | 7845.8        | 14674.3         | 654.2                      | 2886.0                      | 143416.0   | 2716.0         | 21088.0      | 52735.7       | 5720.1       | 55.5         | 0.0           | 37.5         | 172.4       | 0.8            |
| 261585.7              | 4158.2        | 5650.9                | 231.4                 | 7549.1                | 1497.5                | 117876.9      | 471.9                      | 487.0                      | 7209.0        | 13576.5         | 617.3                      | 2909.1                      | 137063.8   | 2528.4         | 19921.6      | 50639.2       | 5375.3       | 52.7         | 0.0           | 38.0         | 182.4       | 1.0            |
| 283625.2              | 4891.1        | 5826.3                | 237.4                 | 7519.3                | 1436.6                | 130840.9      | 490.1                      | 525.9                      | 8129.3        | 14823.0         | 670.3                      | 3503.2                      | 147447.0   | 2657.9         | 20819.3      | 56669.2       | 3844.8       | 59.8         | 0.0           | 45.3         | 214.4       | 0.7            |
| 289582.9              | 4192.8        | 5496.4                | 226.1                 | 6883.5                | 1366.1                | 121374.6      | 487.5                      | 514.4                      | 7634.3        | 14334.3         | 657.3                      | 2849.8                      | 147184.2   | 2728.8         | 20245.3      | 54705.6       | 5665.8       | 57.3         | 0.0           | 44.0         | 206.9       | 0.6            |
| 265508.1              | 4145.0        | 5513.2                | 231.9                 | 7731.6                | 1515.5                | 129861.9      | 472.4                      | 468.5                      | 7197.0        | 13461.1         | 636.0                      | 2801.6                      | 144969.2   | 2532.9         | 19158.9      | 55659.6       | 5715.1       | 62.9         | 0.0           | 39.5         | 184.0       | 0.7            |
| 299393.8              | 4218.7        | 6192.0                | 271.6                 | 8517.1                | 1638.2                | 140451.6      | 535.1                      | 551.4                      | 8401.8        | 15554.7         | 702.3                      | 3042.3                      | 159083.4   | 2887.5         | 21141.9      | 59723.3       | 4930.0       | 66.3         | 0.0           | 53.6         | 247.2       | 1.2            |
| 322224.6              | 4473.0        | 6362.0                | 280.2                 | 8076.2                | 1574.9                | 150406.0      | 529.5                      | 577.8                      | 8477.2        | 15726.5         | 716.4                      | 3313.3                      | 170066.2   | 2930.6         | 21593.5      | 64180.4       | 6477.9       | 71.8         | 0.0           | 55.2         | 268.9       | 0.9            |
| 283687.7              | 3795.1        | 5498.5                | 227.3                 | 6815.7                | 1311.0                | 131523.0      | 499.7                      | 507.5                      | 7831.6        | 14402.8         | 648.8                      | 2847.5                      | 152426.6   | 2638.3         | 19267.0      | 60040.4       | 4650.4       | 65.6         | 0.0           | 51.0         | 237.2       | 0.8            |
| 293267.1              | 4091.0        | 5591.5                | 232.1                 | 6760.8                | 1298.6                | 128707.0      | 496.4                      | 524.6                      | 7829.6        | 14471.8         | 668.2                      | 3076.6                      | 150758.2   | 2697.0         | 19821.8      | 60648.3       | 4848.2       | 60.5         | 0.0           | 51.8         | 242.2       | 0.6            |
| 310020.0              | 5294.5        | 6295.6                | 252.3                 | 7883.5                | 1576.7                | 138282.3      | 576.3                      | 607.1                      | 9062.9        | 16753.2         | 751.8                      | 3719.7                      | 166365.4   | 3110.6         | 23719.1      | 63216.9       | 7723.2       | 64.7         | 0.0           | 45.1         | 214.7       | 0.9            |
| 302103.8              | 5023.3        | 6534.0                | 257.4                 | 8090.4                | 1599.5                | 133056.8      | 544.5                      | 595.4                      | 8563.8        | 16222.6         | 723.1                      | 3171.8                      | 163111.0   | 3025.0         | 23890.8      | 59676.4       | 6499.0       | 63.8         | 0.0           | 51.2         | 239.7       | 0.9            |
| 265203.1              | 4433.7        | 5757.5                | 246.9                 | 6679.6                | 1286.5                | 118092.0      | 496.3                      | 536.5                      | 7850.8        | 14738.7         | 636.6                      | 2848.1                      | 142237.2   | 2700.8         | 21013.1      | 50968.2       | 5030.5       | 53.3         | 0.0           | 53.9         | 259.4       | 0.6            |
| 245156.0              | 3999.5        | 5310.3                | 222.0                 | 6598.4                | 1261.3                | 112095.0      | 462.1                      | 482.4                      | 7295.9        | 13774.2         | 624.7                      | 2527.9                      | 130507.6   | 2590.2         | 19124.5      | 47223.9       | 3792.5       | 47.5         | 0.0           | 38.0         | 163.3       | 0.6            |
| 265607.0              | 3863.9        | 5106.3                | 216.3                 | 6777.2                | 1324.2                | 122140.2      | 464.4                      | 458.5                      | 7234.1        | 13356.8         | 607.7                      | 2909.4                      | 135624.3   | 2415.6         | 17486.9      | 51646.2       | 4770.1       | 60.8         | 0.0           | 47.7         | 193.8       | 0.5            |
| 282269.7              | 4706.2        | 5912.7                | 254.8                 | 7981.6                | 1570.0                | 130546.3      | 486.2                      | 547.2                      | 7985.4        | 14504.4         | 637.3                      | 3210.2                      | 144890.0   | 2729.6         | 21186.5      | 53114.1       | 5808.9       | 61.1         | 0.0           | 38.6         | 181.1       | 0.8            |
| 270758.2              | 3969.6        | 5901.6                | 244.8                 | 7941.2                | 1574.3                | 116872.2      | 488.0                      | 517.6                      | 7613.9        | 14460.9         | 657.2                      | 2950.0                      | 145811.3   | 2726.5         | 20931.2      | 57704.3       | 4819.7       | 54.7         | 0.0           | 41.4         | 196.5       | 0.6            |
| 331089.4              | 4155.2        | 6734.7                | 335.0                 | 7662.2                | 1488.8                | 154220.8      | 550.2                      | 544.8                      | 9046.9        | 16597.9         | 735.1                      | 3221.0                      | 173589.1   | 2937.7         | 21669.3      | 61247.1       | 5079.3       | 63.9         | 0.0           | 77.6         | 400.7       | 0.5            |
| 286746.2              | 4019.2        | 5939.9                | 253.2                 | 7306.0                | 1427.3                | 122595.2      | 510.3                      | 538.6                      | 7805.7        | 14884.9         | 682.4                      | 2637.4                      | 153722.3   | 2831.6         | 21097.9      | 57590.0       | 4196.2       | 60.9         | 0.0           | 45.3         | 217.7       | 0.6            |
| 297992.5              | 4870.5        | 6324.3                | 274.5                 | 7305.1                | 1419.8                | 128461.8      | 484.6                      | 549.6                      | 7984.2        | 14900.6         | 687.4                      | 3190.4                      | 152469.3   | 2761.6         | 21647.4      | 58357.2       | 5101.7       | 56.5         | 0.0           | 55.6         | 278.5       | 0.8            |
| 309143.6              | 5130.2        | 6483.6                | 270.4                 | 7665.7                | 1468.0                | 138595.7      | 546.9                      | 584.6                      | 9067.7        | 16740.5         | 772.7                      | 3229.6                      | 169997.5   | 3106.1         | 23039.0      | 64092.2       | 5660.1       | 72.6         | 0.0           | 48.7         | 232.5       | 0.6            |
| 281654.7              | 4210.6        | 6026.7                | 259.8                 | 7443.7                | 1438.4                | 132316.9      | 491.3                      | 547.3                      | 8314.8        | 15306.3         | 687.4                      | 2941.6                      | 156592.7   | 2822.7         | 21486.4      | 60052.7       | 5744.2       | 64.4         | 0.0           | 60.4         | 280.1       | 0.6            |
| 280602.8              | 4468.1        | 6330.9                | 267.7                 | 8682.7                | 1649.9                | 130001.0      | 512.3                      | 557.2                      | 8472.8        | 15791.8         | 703.1                      | 2935.2                      | 152247.0   | 2943.5         | 21740.9      | 56414.6       | 5234.7       | 63.9         | 0.0           | 45.8         | 214.4       | 0.7            |
| 257295.1              | 3792.2        | 5299.5                | 217.5                 | 6469.8                | 1254.9                | 109434.8      | 469.3                      | 518.9                      | 7649.9        | 14399.1         | 635.3                      | 2409.4                      | 134742.0   | 2719.7         | 19533.8      | 50332.8       | 4466.1       | 54.0         | 0.0           | 47.5         | 215.6       | 0.6            |
| 288657.9              | 4603.8        | 6222.7                | 262.5                 | 7949.2                | 1534.0                | 129528.2      | 500.3                      | 559.2                      | 8076.8        | 15153.0         | 708.2                      | 2988.0                      | 159026.0   | 2897.4         | 21898.8      | 64201.6       | 4387.1       | 64.9         | 0.0           | 52.9         | 248.8       | 0.8            |
| 282234.8              | 4372.5        | 6004.2                | 258.0                 | 7799.9                | 1507.0                | 117281.1      | 483.7                      | 527.8                      | 8203.3        | 15261.3         | 688.8                      | 2858.6                      | 141994.5   | 2804.8         | 20976.4      | 53130.6       | 5336.1       | 54.5         | 0.0           | 47.2         | 221.8       | 0.7            |
| 289544.8              | 5464.5        | 6713.5                | 268.4                 | 8983.3                | 1706.4                | 124547.5      | 520.7                      | 612.8                      | 8669.3        | 16443.3         | 721.8                      | 3585.7                      | 151021.5   | 3045.2         | 24528.9      | 53149.0       | 4273.6       | 55.8         | 0.0           | 43.5         | 201.2       | 0.6            |
| 277213.6              | 4383.5        | 5935.3                | 247.5                 | 7770.9                | 1492.3                | 127029.6      | 494.4                      | 556.9                      | 7888.3        | 14884.9         | 669.1                      | 3941.1                      | 147433.6   | 2788.5         | 20949.3      | 54580.8       | 5655.3       | 59.4         | 0.0           | 43.0         | 204.5       | 0.8            |
| 247942.6              | 3899.7        | 5203.5                | 220.3                 | 6475.3                | 1262.4                | 102573.4      | 448.7                      | 488.5                      | 7161.4        | 13498.8         | 607.1                      | 2464.4                      | 131208.9   | 2519.0         | 19241.2      | 48563.6       | 4809.5       | 53.1         | 0.0           | 42.1         | 195.6       | 0.5            |
| 272106.3              | 4217.7        | 5971.9                | 255.0                 | 8057.3                | 1581.7                | 116099.9      | 502.3                      | 546.8                      | 7882.8        | 14886.6         | 666.3                      | 3079.1                      | 146040.7   | 2837.3         | 21403.0      | 55700.0       | 6259.0       | 56.4         | 0.0           | 45.0         | 211.0       | 0.7            |
| 264963.5              | 4510.5        | 6124.3                | 255.7                 | 8510.9                | 1661.4                | 116629.2      | 497.3                      | 546.2                      | 8155.3        | 15275.7         | 665.0                      | 2907.4                      | 141638.6   | 2814.7         | 21644.8      | 51119.7       | 6875.9       | 56.9         | 0.0           | 41.3         | 193.8       | 0.8            |
| 245642.9              | 3883.0        | 5537.6                | 254.9                 | 8065.6                | 1569.5                | 114917.0      | 432.2                      | 481.2                      | 7089.3        | 13342.8         | 596.3                      | 2480.1                      | 126377.4   | 2485.7         | 18994.9      | 47006.3       | 4966.8       | 47.2         | 0.0           | 44.4         | 209.8       | 0.8            |
| 271596.5              | 4422.0        | 6487.1                | 314.6                 | 10185.6               | 1988.3                | 125555.8      | 517.4                      | 559.6                      | 8115.9        | 15479.1         | 684.8                      | 2795.3                      | 141094.5   | 2904.8         | 21830.7      | 52534.3       | 4779.2       | 55.6         | 0.0           | 45.4         | 206.1       | 0.9            |
| 254436.6              | 4258.6        | 6097.5                | 276.5                 | 9063.8                | 1745.0                | 112567.0      | 464.2                      | 494.5                      | 7700.0        | 14376.2         | 635.2                      | 2701.5                      | 131194.1   | 2586.1         | 19911.4      | 48606.8       | 5222.0       | 52.4         | 0.0           | 38.1         | 183.2       | 0.4            |
| 270323.9              | 4475.5        | 5795.8                | 230.2                 | 7523.1                | 1440.2                | 115345.4      | 466.3                      | 499.9                      | 8588.2        | 15525.1         | 662.4                      | 3113.1                      | 135713.2   | 2622.3         | 20586.8      | 46655.7       | 6004.4       | 53.4         | 0.0           | 38.9         | 183.4       | 0.6            |
| 257710.2              | 3883.8        | 5724.1                | 220.5                 | 7178.3                | 1350.9                | 121037.0      | 464.8                      | 496.1                      | 8027.6        | 14450.1         | 630.0                      | 2690.1                      | 138283.8   | 2561.7         | 19647.9      | 54683.2       | 4541.2       | 57.5         | 0.0           | 46.1         | 217.9       | 0.5            |
| 276064.2              | 4428.5        | 6309.4                | 267.2                 | 8797.6                | 1696.7                | 130167.9      | 501.9                      | 536.6                      | 8220.1        | 15281.9         | 690.5                      | 3034.8                      | 150360.7   | 2821.2         | 21246.7      | 55843.9       | 5074.1       | 62.4         | 0.0           | 48.3         | 230.6       | 0.7            |
| 269868.5              | 4128.3        | 6196.4                | 269.5                 | 8140.3                | 1578.8                | 129169.7      | 480.1                      | 516.6                      | 7660.1        | 14283.4         | 676.4                      | 3077.9                      | 152263.1   | 2721.4         | 20596.1      | 62055.6       | 5228.3       | 55.9         | 0.0           | 52.9         | 259.7       | 0.6            |
| 231502.8              | 3460.7        | 5489.5                | 246.7                 | 8054.7                | 1540.4                | 108431.7      | 433.0                      | 454.0                      | 7236.9        | 13373.9         | 587.9                      | 2421.8                      | 121988.4   | 2431.5         | 17810.6      | 45453.6       | 6068.8       | 44.2         | 0.0           | 36.8         | 181.5       | 0.9            |
| 263756.1              | 4236.7        | 6103.0                | 260.0                 | 8571.4                | 1645.5                | 125746.8      | 487.4                      | 527.6                      | 8155.7        | 15045.7         | 689.7                      | 3075.9                      | 145861.4   | 2807.2         | 20909.9      | 56061.3       | 6029.4       | 59.1         | 0.0           | 44.7         | 211.9       | 0.7            |
| 245897.1              | 3678.3        | 5572.3                | 233.6                 | 7891.0                | 1526.7                | 112550.4      | 452.0                      | 487.6                      | 7503.9        | 13949.4         | 622.0                      | 2670.1                      | 131683.7   | 2551.3         | 18955.7      | 49900.3       | 7468.1       | 54.2         | 0.0           | 34.1         | 164.7       | 0.5            |
| 259789.2              | 3731.5        | 6091.7                | 278.3                 | 9681.5                | 1869.1                | 124345.8      | 461.6                      | 485.4                      | 7686.7        | 14119.7         | 634.9                      | 2638.9                      | 138406.5   | 2533.6         |              |               |              |              |               |              |             |                |

| 酢酸<br>(g) | 調理油<br>(g) | 有機酸<br>(g) | 重量変化率<br>(%) | 備考欄<br>(メモ欄) | 含硫アミノ酸     |              |                      |               | 芳香族アミノ酸      |              |                      | トレオニン<br>(スレオニン)<br>(mg) | トリプトファン<br>(mg)       | バリン<br>(mg) | ヒスチジン<br>(mg) | アルギニン<br>(mg) | アラニン<br>(mg) | アスパラギン酸<br>(mg) | グルタミン酸<br>(mg) | グリシン<br>(mg) |           |           |
|-----------|------------|------------|--------------|--------------|------------|--------------|----------------------|---------------|--------------|--------------|----------------------|--------------------------|-----------------------|-------------|---------------|---------------|--------------|-----------------|----------------|--------------|-----------|-----------|
|           |            |            |              |              | イソロイシン(mg) | ロイシン<br>(mg) | リシン<br>(リジン)<br>(mg) | メチオニン<br>(mg) | シスチン<br>(mg) | 含硫<br>アミノ酸合計 | フェニル<br>アラニン<br>(mg) | チロニン<br>(mg)             | 芳香族<br>アミノ酸合計<br>(mg) |             |               |               |              |                 |                |              |           |           |
| 176.2     | 0.0        | 973.0      | 0.0          | 0.0          | 1428647.4  | 2569083.7    | 2116835.5            | 760282.8      | 509507.3     | 1271451.1    | 1508901.4            | 1195130.6                | 2726088.8             | 1333734.1   | 402995.4      | 1721735.5     | 1086987.6    | 1976484.4       | 1651215.9      | 2966554.0    | 6180684.8 | 1467681.7 |
| 162.1     | 0.0        | 946.9      | 0.0          | 0.0          | 1489391.7  | 2691800.3    | 2209771.5            | 806353.6      | 536531.6     | 1344308.0    | 1573245.0            | 1250004.4                | 2846307.3             | 1393561.4   | 420317.3      | 1809572.8     | 1129637.9    | 2112695.3       | 1755429.3      | 3106390.2    | 6431573.3 | 1581386.7 |
| 206.0     | 0.0        | 1021.5     | 0.0          | 0.0          | 1582242.3  | 2844427.4    | 2371114.5            | 857619.2      | 567461.6     | 1425805.8    | 1680302.7            | 1317967.2                | 3002862.9             | 1490451.1   | 444584.0      | 1907267.1     | 1176204.1    | 2248962.0       | 1886356.5      | 3352531.5    | 6619711.8 | 1720661.1 |
| 185.8     | 0.0        | 1168.6     | 0.0          | 0.0          | 1577965.7  | 2841786.3    | 2316766.7            | 838987.7      | 567235.6     | 1407699.1    | 1676996.6            | 1319815.5                | 3021466.7             | 1472732.8   | 447880.0      | 1912397.7     | 1204179.8    | 2199386.4       | 1830992.4      | 3308502.0    | 6842285.8 | 1633240.2 |
| 154.5     | 0.0        | 1018.4     | 0.0          | 0.0          | 1431806.5  | 2573312.6    | 2129945.6            | 757922.4      | 503021.3     | 1263110.1    | 1509377.0            | 1200298.4                | 2732472.3             | 1336653.5   | 404230.2      | 1728463.1     | 1091921.7    | 1955349.1       | 1640548.5      | 2974947.4    | 6183447.2 | 1463425.3 |
| 158.1     | 0.0        | 1047.8     | 0.0          | 0.0          | 1497361.1  | 2672255.9    | 2263686.2            | 799234.5      | 521207.8     | 1321265.1    | 1558827.5            | 1241565.4                | 2822923.7             | 1408314.9   | 419179.3      | 1798104.8     | 1137850.4    | 2074204.1       | 1757889.9      | 3150587.7    | 6279188.3 | 1560389.7 |
| 160.6     | 0.0        | 978.5      | 0.0          | 0.0          | 1424098.0  | 2560288.8    | 2093278.1            | 751474.0      | 510280.7     | 1263245.2    | 1507772.7            | 1191574.0                | 2721544.2             | 1401847.6   | 1721392.6     | 1721392.6     | 1074400.6    | 1972197.9       | 1640533.7      | 2871413.9    | 6121481.6 | 1449464.6 |
| 208.2     | 0.0        | 1000.2     | 0.0          | 0.0          | 1320759.5  | 2377754.8    | 1947995.1            | 700644.7      | 474551.6     | 1176309.1    | 1400839.7            | 1111897.4                | 2537252.8             | 1235463.9   | 375310.2      | 1601082.5     | 992765.7     | 1845387.2       | 1531554.7      | 2800796.9    | 5631389.3 | 1359583.0 |
| 141.8     | 0.0        | 999.8      | 0.0          | 0.0          | 1399812.8  | 2507175.5    | 2110809.4            | 745678.8      | 488405.6     | 1235573.5    | 1464480.5            | 1162501.4                | 2647506.4             | 1312168.7   | 393077.5      | 1685694.4     | 1096659.2    | 1908340.7       | 1622206.4      | 2910236.5    | 5993624.9 | 1431883.1 |
| 176.1     | 0.0        | 982.4      | 0.0          | 0.0          | 1383226.3  | 2494747.4    | 2026118.9            | 732175.9      | 496897.0     | 1232853.8    | 1471113.8            | 1163982.7                | 2656947.3             | 1287561.7   | 393130.3      | 1678213.6     | 1051341.7    | 1918212.0       | 1587016.0      | 2880079.9    | 6017382.7 | 1403322.9 |
| 202.8     | 0.0        | 988.2      | 0.0          | 0.0          | 1291055.4  | 2329698.4    | 1883576.1            | 682598.6      | 468575.4     | 1152384.8    | 1379986.5            | 1084933.0                | 2485182.5             | 1203473.2   | 368177.1      | 1570715.6     | 977030.9     | 1813469.7       | 1497111.7      | 2571716.5    | 5617754.1 | 1324584.8 |
| 191.7     | 0.0        | 1088.2     | 0.0          | 0.0          | 1479670.7  | 2662930.7    | 2201555.2            | 782726.3      | 520705.4     | 1305526.7    | 1560564.7            | 1240279.5                | 2823082.6             | 1379726.0   | 416889.9      | 1787726.5     | 1132711.3    | 2035639.5       | 1706342.3      | 3068794.0    | 6447314.9 | 1526791.9 |
| 178.9     | 0.0        | 1115.7     | 0.0          | 0.0          | 1497284.0  | 2688981.1    | 2243233.9            | 788291.4      | 519147.6     | 1311246.7    | 1573175.3            | 1253565.3                | 2846479.5             | 1395632.7   | 422279.2      | 1800826.7     | 1155913.5    | 2036811.0       | 1707024.9      | 3104042.5    | 6493081.8 | 1525385.2 |
| 169.2     | 0.0        | 998.2      | 0.0          | 0.0          | 1358367.7  | 2441813.1    | 2037205.6            | 717237.7      | 472685.1     | 1192343.9    | 1428422.9            | 1138436.0                | 2585264.9             | 1267598.2   | 383029.4      | 1635355.4     | 1051398.4    | 1861190.5       | 1561770.4      | 2816701.4    | 5933239.1 | 1399592.3 |
| 154.6     | 0.0        | 1051.7     | 0.0          | 0.0          | 1378007.1  | 2476766.5    | 2068041.7            | 728177.2      | 477207.3     | 1207840.9    | 1446751.7            | 1152418.4                | 2617873.7             | 1284120.9   | 387599.0      | 1659053.5     | 1063157.1    | 1872314.8       | 1574726.6      | 2849911.9    | 5998216.8 | 1407836.3 |
| 189.2     | 0.0        | 1121.0     | 0.0          | 0.0          | 1599270.0  | 2873072.7    | 2381690.6            | 842372.8      | 561193.2     | 1405687.9    | 1686806.6            | 1337306.3                | 3049070.2             | 1483873.0   | 450457.5      | 1924052.9     | 1189993.3    | 2210808.6       | 1847927.5      | 3368538.6    | 6891545.1 | 1657309.6 |
| 172.1     | 0.0        | 1101.5     | 0.0          | 0.0          | 1583282.6  | 2845672.7    | 2330312.7            | 842358.6      | 569410.9     | 1413078.8    | 1677523.2            | 1328369.1                | 3032986.1             | 1473757.4   | 446568.7      | 1947325.0     | 1196261.5    | 2199336.8       | 1818132.4      | 3398612.2    | 6764746.0 | 1611011.2 |
| 151.4     | 0.0        | 932.2      | 0.0          | 0.0          | 1430011.9  | 2567872.4    | 2124546.5            | 755948.7      | 505580.3     | 1265465.8    | 1508349.5            | 1194212.2                | 2742444.4             | 1330575.2   | 400515.9      | 1715013.2     | 1061045.4    | 1950677.7       | 1633008.2      | 2942214.3    | 6264782.0 | 1467997.0 |
| 144.8     | 0.0        | 901.5      | 0.0          | 0.0          | 1326696.1  | 2396884.5    | 1942187.8            | 712598.3      | 495146.6     | 1199066.4    | 1413458.9            | 1115231.2                | 2505524.4             | 1239875.6   | 378086.6      | 1611710.3     | 998143.3     | 1875777.4       | 1547365.7      | 2776524.6    | 5723966.3 | 1373034.0 |
| 157.9     | 0.0        | 915.1      | 0.0          | 0.0          | 1273661.5  | 2289786.5    | 1900319.6            | 672269.2      | 448933.1     | 1122994.9    | 1344767.7            | 1060363.3                | 2423104.4             | 1192089.3   | 358942.9      | 1532862.9     | 989262.9     | 1768237.2       | 1477547.8      | 2658840.7    | 5570439.2 | 1336407.2 |
| 173.0     | 0.0        | 1027.5     | 0.0          | 0.0          | 1425154.9  | 2563520.9    | 2086113.5            | 747668.5      | 503408.5     | 1252962.2    | 1508739.4            | 1194289.4                | 2724289.6             | 1320263.1   | 401050.2      | 1717943.9     | 1058975.8    | 1914490.0       | 1606160.6      | 2923663.8    | 6256398.4 | 1429051.3 |
| 170.8     | 0.0        | 998.2      | 0.0          | 0.0          | 1409328.2  | 2536735.1    | 2051807.2            | 740490.3      | 513381.5     | 1255383.2    | 1503940.0            | 1184528.8                | 2711075.6             | 1311443.9   | 399866.6      | 1704185.5     | 1065535.2    | 1961266.5       | 1612562.4      | 2936977.1    | 6133866.7 | 1431122.7 |
| 147.5     | 0.0        | 977.0      | 0.0          | 0.0          | 1546892.2  | 2789974.0    | 2296084.3            | 827459.0      | 535561.8     | 1382585.1    | 1638575.4            | 1295647.2                | 2956035.0             | 1449447.3   | 439442.6      | 1877306.8     | 1233231.9    | 2196060.3       | 1814343.8      | 3255404.5    | 6631880.0 | 1616432.8 |
| 209.2     | 0.0        | 1026.4     | 0.0          | 0.0          | 1452464.3  | 2617027.5    | 2110339.6            | 762927.8      | 528328.2     | 1292993.2    | 1549621.2            | 1221899.1                | 2794121.9             | 1347611.7   | 412015.7      | 1755873.6     | 1092309.9    | 2000649.0       | 1951860.4      | 2992681.0    | 6437222.8 | 1471692.9 |
| 209.8     | 0.0        | 1027.8     | 0.0          | 0.0          | 1432333.4  | 2563878.6    | 2152993.9            | 765171.3      | 502671.0     | 1269649.6    | 1496778.1            | 1189657.9                | 2707389.4             | 1341349.6   | 402434.0      | 1721948.2     | 1111335.1    | 1966168.8       | 1650388.0      | 2979885.4    | 6036111.1 | 1455708.2 |
| 175.9     | 0.0        | 1109.0     | 0.0          | 0.0          | 1581343.8  | 2842467.8    | 2348717.6            | 846008.6      | 569018.2     | 1416584.0    | 1671418.3            | 1319266.3                | 3013433.9             | 1478054.9   | 446671.5      | 1907377.9     | 1212620.5    | 2192070.3       | 1834112.6      | 3284871.4    | 6893247.4 | 1627774.9 |
| 151.4     | 0.0        | 1055.1     | 0.0          | 0.0          | 1447271.1  | 2597834.8    | 2142369.2            | 763578.9      | 516102.2     | 1281333.4    | 1529060.0            | 1209450.0                | 2756905.7             | 1347363.3   | 407771.5      | 1738257.0     | 1098430.5    | 1981558.0       | 1653427.4      | 2989362.5    | 6373626.3 | 1470788.2 |
| 165.3     | 0.0        | 984.9      | 0.0          | 0.0          | 1509036.3  | 2715713.1    | 2241309.8            | 808322.2      | 541275.9     | 1351394.5    | 1591461.8            | 1264905.7                | 2879500.6             | 1410615.8   | 426420.8      | 1821081.7     | 1148202.2    | 2094723.1       | 1746160.4      | 3114646.6    | 6517892.8 | 1552238.5 |
| 169.3     | 0.0        | 952.6      | 0.0          | 0.0          | 1387434.3  | 2502688.2    | 2048621.6            | 738361.2      | 495472.2     | 1236084.5    | 1467716.0            | 1168379.8                | 2656318.3             | 1289103.9   | 392733.2      | 1675063.2     | 1054655.4    | 1904680.4       | 1580847.5      | 2837360.3    | 6056389.5 | 1405648.4 |
| 185.7     | 0.0        | 1108.2     | 0.0          | 0.0          | 1463109.9  | 2625610.7    | 2178743.3            | 774908.9      | 518588.2     | 129567.5     | 1540961.2            | 1221330.9                | 2782479.9             | 1364537.9   | 411851.1      | 1759329.5     | 1109318.0    | 2004555.6       | 1672625.6      | 3036712.2    | 6351656.6 | 1482067.2 |
| 231.1     | 0.0        | 962.5      | 0.0          | 0.0          | 1460097.7  | 2626372.5    | 2160573.4            | 781896.6      | 528029.2     | 1311223.7    | 1543911.7            | 1219615.6                | 2785248.0             | 1366575.0   | 412474.0      | 1761338.0     | 1127420.5    | 2037406.0       | 1696004.2      | 3035681.3    | 6299664.4 | 1505855.5 |
| 140.5     | 0.0        | 985.2      | 0.0          | 0.0          | 1613988.6  | 2892118.5    | 2398186.2            | 868321.6      | 581063.1     | 1450246.9    | 1696283.8            | 1343974.5                | 3063854.9             | 1508946.2   | 453017.6      | 1937713.9     | 1208192.3    | 2229449.3       | 1863532.7      | 3340158.1    | 6885441.5 | 1646809.8 |
| 186.1     | 0.0        | 979.3      | 0.0          | 0.0          | 1447023.7  | 2595915.6    | 2168032.9            | 770697.2      | 508103.7     | 1280756.7    | 1520486.9            | 1208714.1                | 2748309.2             | 1353747.5   | 407247.9      | 1736880.7     | 1091750.1    | 1986493.0       | 1663689.7      | 2992267.4    | 6249844.6 | 1478053.8 |
| 191.5     | 0.0        | 926.5      | 0.0          | 0.0          | 1315037.4  | 2359592.0    | 1940909.9            | 690744.3      | 470640.0     | 1163011.6    | 1391435.4            | 1097792.8                | 2507904.1             | 1223078.9   | 369105.0      | 1577472.8     | 994153.2     | 1793114.9       | 1496498.5      | 2713244.6    | 5811954.8 | 1335195.9 |
| 165.0     | 0.0        | 1017.4     | 0.0          | 0.0          | 1451506.4  | 2605402.1    | 2154375.5            | 765665.7      | 518422.3     | 1286077.8    | 1531664.8            | 1211375.3                | 2764310.5             | 1353813.9   | 408376.9      | 1724251.9     | 1089563.9    | 2002209.9       | 1665204.4      | 3003684.9    | 6300596.2 | 1481090.5 |
| 142.7     | 0.0        | 934.7      | 0.0          | 0.0          | 1476338.5  | 2648705.6    | 2205610.0            | 788441.4      | 525822.5     | 1315930.3    | 1551638.2            | 1234578.4                | 2808256.7             | 1380345.9   | 415699.2      | 1774319.5     | 1111697.2    | 2045739.6       | 1703013.3      | 3068473.0    | 6289458.4 | 1509955.9 |
| 150.0     | 0.0        | 888.4      | 0.0          | 0.0          | 1289388.7  | 2317231.8    | 1902105.7            | 683086.4      | 462512.0     | 1147401.0    | 1365714.1            | 1078958.9                | 2463369.6             | 1201313.9   | 365352.1      | 1553162.0     | 992917.8     | 1769470.7       | 1469420.2      | 2665207.3    | 5601379.2 | 1298849.8 |
| 171.7     | 0.0        | 1002.0     | 0.0          | 0.0          | 1516884.4  | 2727281.9    | 2228196.6            | 803072.1      | 550963.9     | 1355586.9    | 1608999.8            | 1266499.0                | 2897918.6             | 1411413.7   | 428492.9      | 1822511.6     | 1147259.6    | 2076342.9       | 1726871.3      | 3109371.0    | 6682493.5 | 1537596.4 |
| 180.3     | 0.0        | 856.0      | 0.0          | 0.0          | 1376158.4  | 2468846.3    | 2057382.6            | 739066.6      | 496791.0     | 1236934.2    | 1450758.0            | 1149291.6                | 2621459.2             | 1291584.3   | 389148.3      | 1654461.6     | 1062165.5    | 1923203.0       | 1601789.6      | 2860680.9    | 5989552.3 | 1432668.4 |
| 172.3     | 0.0        | 833.2      | 0.0          | 0.0          | 1430158.2  | 2561260.5    | 2160348.5            | 781676.0      | 513989.4     | 1295960.8    | 1495592.5            |                          |                       |             |               |               |              |                 |                |              |           |           |



| 飽和脂肪酸        |             |                       |                |               |              |                         |                         |                   |                      |                      |                      |                      |                       |                        |                        |                                 |                        |                            |                             | 15:0<br>ペンタ<br>デカン酸<br>(mg) | 16:0<br>パルミチン酸<br>(mg) | 16:0 iso<br>パルミチン酸<br>(mg) | 17:0<br>ヘプタ<br>デカン酸<br>(mg) | 17:0 ant<br>デカン酸<br>(mg) | 18:0<br>ステアリン酸<br>(mg) |
|--------------|-------------|-----------------------|----------------|---------------|--------------|-------------------------|-------------------------|-------------------|----------------------|----------------------|----------------------|----------------------|-----------------------|------------------------|------------------------|---------------------------------|------------------------|----------------------------|-----------------------------|-----------------------------|------------------------|----------------------------|-----------------------------|--------------------------|------------------------|
| プロリン<br>(mg) | セリン<br>(mg) | ヒドロキシ<br>プロリン<br>(mg) | アミノ酸合計<br>(mg) | アンモニア<br>(mg) | 脂肪酸総量<br>(g) | n-3系<br>多価不飽和<br>脂肪酸(g) | n-6系<br>多価不飽和<br>脂肪酸(g) | 4:0<br>酪酸<br>(mg) | 6:0<br>ヘキサン酸<br>(mg) | 7:0<br>ヘプタン酸<br>(mg) | 8:0<br>オクタン酸<br>(mg) | 10:0<br>デカン酸<br>(mg) | 12:0<br>ラウリン酸<br>(mg) | 13:0<br>トリデカン酸<br>(mg) | 14:0<br>ミリスチン酸<br>(mg) | 15:0 ant<br>ペンタ<br>デカン酸<br>(mg) | 16:0<br>パルミチン酸<br>(mg) | 16:0 iso<br>パルミチン酸<br>(mg) | 17:0<br>ヘプタ<br>デカン酸<br>(mg) | 17:0 ant<br>デカン酸<br>(mg)    | 18:0<br>ステアリン酸<br>(mg) |                            |                             |                          |                        |
| 1951625.4    | 1658057.1   | 124687.1              | 32637231.1     | 651575.2      | 36666.7      | 1339.2                  | 6788.7                  | 136730.8          | 89264.9              | 762.4                | 55990.4              | 130821.4             | 216079.9              | 2287.2                 | 825058.6               | 77423.6                         | 20460.3                | 7222043.5                  | 9680.3                      | 103116.3                    | 19503.9                | 2997540.3                  |                             |                          |                        |
| 2018089.7    | 1719486.4   | 137605.8              | 34240466.6     | 681966.6      | 37975.3      | 1424.2                  | 6956.5                  | 139713.0          | 90881.3              | 687.0                | 57139.1              | 133856.7             | 223566.0              | 2061.0                 | 864936.5               | 77962.4                         | 20838.5                | 7524906.4                  | 9779.1                      | 103029.0                    | 19831.8                | 3152317.6                  |                             |                          |                        |
| 2048928.0    | 1841725.3   | 139218.0              | 36128117.7     | 709780.4      | 39538.4      | 1639.3                  | 7571.1                  | 113806.1          | 74231.4              | 624.8                | 47218.7              | 112787.6             | 198235.9              | 1874.4                 | 808442.3               | 73739.8                         | 17042.0                | 7537238.3                  | 8007.9                      | 105939.4                    | 16285.3                | 3161515.0                  |                             |                          |                        |
| 2156147.1    | 1837842.5   | 131330.9              | 36171286.3     | 741453.6      | 37792.1      | 1558.8                  | 7058.5                  | 143898.3          | 93947.6              | 797.1                | 59105.0              | 137012.2             | 228965.8              | 2391.3                 | 880828.9               | 79792.1                         | 21599.8                | 7403311.6                  | 10144.6                     | 102840.4                    | 20621.3                | 3060258.9                  |                             |                          |                        |
| 1976993.7    | 1665048.6   | 125550.5              | 32686950.3     | 670099.3      | 36141.4      | 1345.9                  | 6497.1                  | 153445.0          | 100068.1             | 867.7                | 61196.9              | 143702.0             | 222769.6              | 2603.1                 | 879384.0               | 81510.0                         | 22965.4                | 7238719.2                  | 10881.5                     | 104545.7                    | 21917.4                | 3068034.1                  |                             |                          |                        |
| 1965824.4    | 1738886.1   | 135877.6              | 34040121.6     | 670697.9      | 36639.3      | 1440.9                  | 6718.7                  | 122238.4          | 79895.9              | 713.8                | 49897.2              | 118883.7             | 198262.9              | 2141.4                 | 800720.8               | 72709.1                         | 18322.4                | 7269993.6                  | 9689.9                      | 101829.6                    | 17476.0                | 3070699.5                  |                             |                          |                        |
| 1937437.2    | 1665739.2   | 116641.5              | 32459033.3     | 656949.9      | 36031.4      | 1387.1                  | 6774.0                  | 130941.4          | 85393.4              | 735.0                | 52892.0              | 122965.9             | 193188.0              | 2205.0                 | 796881.5               | 75839.4                         | 19663.0                | 6969193.5                  | 9242.1                      | 101917.1                    | 18760.4                | 2887651.7                  |                             |                          |                        |
| 1779005.2    | 1552234.3   | 113137.2              | 30198313.9     | 615231.2      | 33486.7      | 1327.2                  | 6509.5                  | 120750.2          | 78794.4              | 682.2                | 48790.8              | 115152.0             | 186473.4              | 2046.6                 | 724173.1               | 65826.7                         | 18111.1                | 6453875.3                  | 8541.3                      | 88187.6                     | 17282.8                | 2744819.9                  |                             |                          |                        |
| 1890047.1    | 1617076.3   | 121629.6              | 31901902.7     | 640959.6      | 35071.3      | 1452.9                  | 6539.0                  | 134165.5          | 87632.5              | 770.9                | 55133.0              | 127957.0             | 210680.9              | 2312.7                 | 808198.4               | 74865.3                         | 20091.6                | 6803741.1                  | 9526.0                      | 97473.2                     | 19068.8                | 2851680.7                  |                             |                          |                        |
| 1905422.0    | 1615094.8   | 110793.9              | 31661403.4     | 615049.7      | 33146.9      | 1259.2                  | 6156.5                  | 140897.4          | 91923.0              | 792.1                | 57319.1              | 132440.7             | 212014.1              | 2376.3                 | 796375.1               | 74567.8                         | 21083.2                | 6595093.3                  | 9984.9                      | 94333.4                     | 20047.9                | 2739045.5                  |                             |                          |                        |
| 1757428.7    | 1508153.1   | 101366.2              | 29633733.4     | 614379.5      | 31718.4      | 1342.5                  | 6411.4                  | 117060.3          | 76315.7              | 627.3                | 47710.8              | 110698.2             | 181064.5              | 1866.9                 | 679285.8               | 63003.5                         | 17567.5                | 5940289.4                  | 8213.1                      | 80903.3                     | 16791.9                | 2489748.7                  |                             |                          |                        |
| 2046347.6    | 1708201.4   | 134902.3              | 33901930.0     | 685548.3      | 39565.5      | 1473.6                  | 7367.6                  | 152441.6          | 99486.6              | 843.7                | 62144.7              | 145496.3             | 239228.9              | 2531.1                 | 900269.4               | 83402.1                         | 22863.7                | 7762938.1                  | 10755.6                     | 109878.5                    | 21834.9                | 3283579.0                  |                             |                          |                        |
| 2069337.0    | 1720232.1   | 188840.3              | 34172499.2     | 687487.2      | 72134.8      | 1447.6                  | 6996.3                  | 202149.3          | 143681.2             | 34740.7              | 102093.0             | 157279.7             | 249466.0              | 36656.1                | 936834.6               | 88780.2                         | 58982.4                | 7587847.9                  | 45730.2                     | 111280.4                    | 57785.9                | 3165748.6                  |                             |                          |                        |
| 1886364.1    | 1559199.3   | 124128.7              | 31129938.6     | 624978.2      | 35230.7      | 1238.7                  | 6129.3                  | 149257.8          | 97205.4              | 774.6                | 60413.4              | 140917.4             | 227169.6              | 2323.8                 | 866800.1               | 81603.1                         | 22298.1                | 7137529.1                  | 10494.7                     | 106176.6                    | 21280.8                | 2982474.5                  |                             |                          |                        |
| 1920157.9    | 1580370.8   | 123142.6              | 31499520.7     | 635130.5      | 34994.7      | 1289.9                  | 6089.1                  | 159560.1          | 84368.8              | 149153.8             | 64368.8              | 149153.8             | 236432.0              | 2530.5                 | 890428.7               | 83787.0                         | 23837.4                | 7100423.9                  | 1243.7                      | 105129.8                    | 2970612.3              |                            |                             |                          |                        |
| 2186397.2    | 1851347.9   | 138795.8              | 36549841.0     | 746683.9      | 38680.4      | 1498.6                  | 7074.4                  | 153678.5          | 100541.7             | 940.2                | 62543.7              | 147011.7             | 239049.9              | 2820.6                 | 915225.7               | 83002.4                         | 23083.7                | 7735017.6                  | 10667.5                     | 110047.6                    | 22001.7                | 3285821.0                  |                             |                          |                        |
| 2134759.4    | 1856481.2   | 126114.3              | 36058888.6     | 730391.0      | 37692.7      | 1502.7                  | 7033.7                  | 146332.1          | 95595.2              | 820.8                | 59962.1              | 139486.4             | 229704.5              | 2462.4                 | 866306.9               | 81797.4                         | 21971.0                | 7429380.2                  | 10030.4                     | 109214.4                    | 21020.4                | 3060541.7                  |                             |                          |                        |
| 1993704.8    | 1658212.6   | 128791.4              | 32687765.4     | 662400.3      | 35836.5      | 1274.4                  | 6141.1                  | 141332.9          | 82254.4              | 783.7                | 57625.8              | 135790.0             | 222664.2              | 2351.1                 | 865312.5               | 81596.9                         | 21141.5                | 7308199.1                  | 10003.6                     | 111737.3                    | 20179.3                | 3060006.4                  |                             |                          |                        |
| 1791226.5    | 1552584.0   | 110524.3              | 30395864.4     | 610734.4      | 32615.7      | 1197.2                  | 5989.6                  | 118188.0          | 77141.8              | 656.9                | 48228.3              | 113304.8             | 186219.9              | 1977.6                 | 741954.9               | 70567.9                         | 17642.1                | 6498868.3                  | 9386.9                      | 97454.5                     | 16807.6                | 2671041.7                  |                             |                          |                        |
| 1753589.4    | 1464320.3   | 116468.8              | 29274276.1     | 596082.6      | 32412.2      | 1247.7                  | 5971.1                  | 117162.5          | 76578.9              | 659.2                | 49123.3              | 114609.8             | 199244.6              | 1970.7                 | 733143.0               | 66912.5                         | 17524.7                | 6382611.1                  | 8307.0                      | 91729.0                     | 16645.1                | 2713335.0                  |                             |                          |                        |
| 2013737.2    | 1661426.8   | 114200.6              | 32483928.5     | 677188.0      | 35487.5      | 1430.1                  | 6825.2                  | 156883.9          | 102512.5             | 911.4                | 64336.6              | 146816.2             | 236756.8              | 2734.2                 | 843185.3               | 78435.4                         | 23530.5                | 6870365.5                  | 11136.4                     | 94302.1                     | 22402.3                | 2874374.9                  |                             |                          |                        |
| 1930717.1    | 1656834.0   | 111104.3              | 32233745.8     | 659808.1      | 35416.8      | 1359.7                  | 6763.2                  | 130225.1          | 84986.2              | 719.2                | 53270.7              | 124621.9             | 205466.4              | 2157.6                 | 783684.5               | 74721.6                         | 19465.7                | 6859454.9                  | 9219.5                      | 99350.1                     | 18545.2                | 2825210.7                  |                             |                          |                        |
| 2071809.0    | 1779787.8   | 131891.3              | 35510470.0     | 709071.4      | 37000.5      | 1435.4                  | 6846.6                  | 139523.6          | 98089.1              | 702.9                | 56910.2              | 133175.8             | 220222.9              | 2108.7                 | 842666.7               | 77760.7                         | 20801.5                | 7362187.8                  | 9797.6                      | 104144.8                    | 19802.3                | 3070116.2                  |                             |                          |                        |
| 2042711.7    | 1704925.9   | 119512.5              | 33313400.2     | 688100.9      | 35924.0      | 1253.2                  | 6553.6                  | 145993.6          | 96354.6              | 786.1                | 61271.0              | 140779.6             | 242191.7              | 2358.3                 | 842870.6               | 78762.5                         | 21851.6                | 7234279.1                  | 10288.1                     | 101859.8                    | 20813.6                | 2991921.3                  |                             |                          |                        |
| 1906571.3    | 1680700.5   | 122253.8              | 32479914.4     | 633415.9      | 35857.0      | 1390.7                  | 6435.2                  | 138071.0          | 90250.6              | 796.7                | 57736.6              | 130949.9             | 218390.1              | 2390.1                 | 841810.5               | 80719.8                         | 20630.3                | 7099120.9                  | 9831.4                      | 107595.4                    | 19533.6                | 2901141.1                  |                             |                          |                        |
| 2162229.2    | 1834869.4   | 133962.7              | 36221163.4     | 726543.1      | 38853.1      | 1468.6                  | 6856.2                  | 144239.4          | 94134.8              | 773.0                | 59749.5              | 138213.3             | 233578.4              | 2319.0                 | 916666.6               | 87448.7                         | 21507.4                | 7769809.2                  | 10201.6                     | 117755.2                    | 20474.9                | 3152311.3                  |                             |                          |                        |
| 2012661.5    | 1677843.6   | 116188.3              | 33097313.7     | 668421.4      | 35870.6      | 1311.7                  | 6503.2                  | 143543.8          | 93615.5              | 766.0                | 58889.5              | 135568.9             | 222172.1              | 2298.0                 | 843164.1               | 82073.1                         | 21453.7                | 7109893.4                  | 10121.3                     | 105846.6                    | 20451.6                | 2870355.7                  |                             |                          |                        |
| 2048986.2    | 1757745.4   | 130464.4              | 34469897.4     | 679780.9      | 40345.7      | 1487.8                  | 7441.1                  | 140630.3          | 92008.0              | 827.3                | 58171.0              | 135937.8             | 228829.8              | 2481.9                 | 889880.9               | 85642.0                         | 21071.4                | 7857379.0                  | 10010.9                     | 116357.1                    | 20082.8                | 3215123.8                  |                             |                          |                        |
| 1930305.1    | 1609276.3   | 116921.3              | 31685641.8     | 632575.9      | 34588.8      | 1149.3                  | 5959.3                  | 155966.9          | 101830.5             | 875.0                | 63868.9              | 146418.5             | 235670.5              | 2625.0                 | 875863.0               | 83892.5                         | 23281.8                | 7107690.0                  | 11080.5                     | 105522.1                    | 22178.0                | 2898665.3                  |                             |                          |                        |
| 2009304.7    | 1699143.6   | 122348.2              | 33362072.7     | 667114.1      | 38080.5      | 1405.2                  | 6844.0                  | 150278.0          | 98065.8              | 832.2                | 61189.8              | 141580.8             | 228035.1              | 2496.6                 | 897097.8               | 87614.0                         | 22451.8                | 7494302.6                  | 10649.1                     | 114309.6                    | 21401.8                | 3045954.5                  |                             |                          |                        |
| 1977187.7    | 1701587.5   | 123991.0              | 33397740.2     | 658358.1      | 37379.2      | 1391.2                  | 6800.7                  | 125218.9          | 81948.9              | 750.2                | 51784.6              | 121949.5             | 206459.0              | 2250.6                 | 824216.4               | 79305.0                         | 18679.3                | 7353359.3                  | 9878.1                      | 110085.8                    | 17743.8                | 2981306.5                  |                             |                          |                        |
| 2161093.4    | 1892186.4   | 131623.4              | 36664645.0     | 718571.9      | 41179.5      | 1585.1                  | 7748.1                  | 134885.5          | 88436.2              | 820.9                | 56853.4              | 132274.9             | 230898.7              | 2462.7                 | 870755.5               | 83391.9                         | 20229.5                | 7981940.4                  | 9635.6                      | 114224.0                    | 19266.7                | 3245204.7                  |                             |                          |                        |
| 1975154.5    | 1672170.1   | 126696.4              | 32985365.0     | 652116.2      | 37379.9      | 1391.4                  | 6870.8                  | 145863.5          | 95241.8              | 854.0                | 58757.9              | 137973.6             | 218523.9              | 2562.0                 | 855392.2               | 81529.8                         | 21810.3                | 7400624.6                  | 10400.1                     | 106900.7                    | 20756.9                | 3054233.6                  |                             |                          |                        |
| 1848488.4    | 1533267.9   | 113239.3              | 30108282.0     | 611788.8      | 33089.4      | 1162.3                  | 5888.1                  | 128409.7          | 83968.6              | 757.5                | 52626.9              | 123230.2             | 202957.2              | 2272.5                 | 775268.5               | 73271.3                         | 19228.8                | 6671715.0                  | 9150.3                      | 97095.9                     | 18322.0                | 2743512.0                  |                             |                          |                        |
| 1997023.9    | 1691768.1   | 127607.7              | 33132853.3     | 657909.5      | 38663.9      | 1364.5                  | 7037.6                  | 142189.6          | 93038.8              | 837.7                | 58943.3              | 136956.1             | 230399.3              | 2513.1                 | 877113.6               | 83825.2                         | 21218.7                | 7657248.5                  | 10168.5                     | 112866.9                    | 20179.1                | 3148279.1                  |                             |                          |                        |
| 1986364.4    | 1721329.8   | 130512.7              | 33591664.8     | 653329.1      | 39527.7      | 1450.2                  | 7365.4                  | 134594.8          | 88053.0              | 778.9                | 56268.5              | 130526.8             | 223431.4              | 2336.7                 | 853182.7               | 81370.5                         | 20151.2                | 7720728.4                  | 9568.2                      | 112392.3                    | 19172.6                | 3190181.2                  |                             |                          |                        |
| 1775448.1    | 1503315.9   | 104368.2              | 29408649.0     | 590150.2      | 34639.3      | 1372.9                  | 6701.3                  | 128704.9          | 84125.6              | 756.5                | 52794.0              | 121285.4             | 196912.0              | 2269.5                 | 761818.2               | 74126.5                         | 19237.8                | 6555899.6                  | 9184.5                      | 96613.4                     | 18281.0                | 2676738.2                  |                             |                          |                        |
| 2122636.5    | 1775461.2   | 126164.6              | 34693284.1     | 699356.6      | 42196.7      | 1680.2                  | 8406.3                  | 138694.1          | 90817.8              | 858.3                | 56905.0              | 133704.3             | 221253.7              | 2574.9                 | 868647.0               | 83992.5                         | 20802.9                | 7903742.7                  | 9929.3                      | 112727.1                    | 19812.1                | 3233545.5                  |                             |                          |                        |
| 1850107.9    | 1605438.3   | 125083.5              | 31463373.3     | 612428.6      | 38843.1      | 1528.8                  | 7555.6                  | 109116.4          | 71315.3              | 623.4                | 45140.2              | 107146.2             | 183786.4              | 1870.2                 | 767592.1               | 73408.6                         | 16334.3                | 7293360.9                  | 7745.5                      | 105974.4                    | 15549.5                | 3004798.1                  |                             |                          |                        |
| 1843630.2    | 1663846.1   | 126783.7              | 32591782.5     | 615809.5      | 36000.3      | 1379.8                  | 6682.6                  | 101026.1          | 65928.5              | 542.1                | 41920.9              | 100854.2             | 176548.3              | 1626.3                 | 731174.7               | 69276.1                         | 15093.6                | 7047232.1                  | 7130.6                      | 102676.6                    | 14365.                 |                            |                             |                          |                        |

| 一価不飽和脂肪酸               |                      |                         |                      |                          |                         |                          |                         |                   |                           |                                |                       |                       |                         |                               |                                |                                 |                           |                             |                             |                                     |                                 |                                  |  |  |
|------------------------|----------------------|-------------------------|----------------------|--------------------------|-------------------------|--------------------------|-------------------------|-------------------|---------------------------|--------------------------------|-----------------------|-----------------------|-------------------------|-------------------------------|--------------------------------|---------------------------------|---------------------------|-----------------------------|-----------------------------|-------------------------------------|---------------------------------|----------------------------------|--|--|
| 20:0<br>アラキジン酸<br>(mg) | 22:0<br>ベヘン酸<br>(mg) | 24:0<br>リグドセリン酸<br>(mg) | 10:1<br>デセン酸<br>(mg) | 14:1<br>ミリストレイン酸<br>(mg) | 15:1<br>ペンタデセン酸<br>(mg) | 16:1<br>パルミトレイン酸<br>(mg) | 17:1<br>ヘプタデセン酸<br>(mg) | 18:1<br>計<br>(mg) | 18:1 n-9<br>オレイン酸<br>(mg) | 18:1 n-7<br>シス-パルксеン酸<br>(mg) | 20:1<br>イコセン酸<br>(mg) | 22:1<br>ドコセン酸<br>(mg) | 24:1<br>テトラコセン酸<br>(mg) | 16:2<br>ヘキサデカ<br>ジエン酸<br>(mg) | 16:3<br>ヘキサデカ<br>トリエン酸<br>(mg) | 16:4<br>ヘキサデカ<br>テトラエン酸<br>(mg) | 18:2 n-6<br>リノール酸<br>(mg) | 18:3 n-3<br>α-リノレン酸<br>(mg) | 18:3 n-6<br>γ-リノレン酸<br>(mg) | 18:4 n-3<br>オクタデカ<br>テトラエン酸<br>(mg) | 20:2 n-6<br>イコサ<br>ジエン酸<br>(mg) | 20:3 n-3<br>イコサ<br>トリエン酸<br>(mg) |  |  |
| 104178.6               | 48900.5              | 22134.8                 | 11607.1              | 100667.6                 | 22.7                    | 815294.3                 | 84945.6                 | 14902759.2        | 6095568.0                 | 380083.3                       | 2977710.6             | 96858.4               | 195542.9                | 2559.9                        | 2458.3                         | 2736.7                          | 6520667.0                 | 1043089.8                   | 1163.8                      | 25402.8                             | 50035.0                         | 440.5                            |  |  |
| 107938.6               | 48624.4              | 23033.7                 | 11793.7              | 89590.1                  | 46.7                    | 824718.6                 | 82308.1                 | 15253849.5        | 6518604.2                 | 424625.3                       | 372749.0              | 168570.5              | 21191.8                 | 3673.8                        | 2944.0                         | 3903.2                          | 6679119.5                 | 1056757.5                   | 1446.0                      | 36839.6                             | 57013.6                         | 857.9                            |  |  |
| 116317.1               | 55387.3              | 24924.4                 | 9715.2               | 92947.9                  | 41.7                    | 845211.5                 | 86642.2                 | 16060134.9        | 6822543.0                 | 432336.7                       | 387368.4              | 171241.0              | 25114.8                 | 4545.3                        | 3809.5                         | 4852.0                          | 7268736.4                 | 1174126.4                   | 2127.5                      | 45103.6                             | 56217.8                         | 808.1                            |  |  |
| 108962.4               | 50625.8              | 22639.9                 | 12218.2              | 84254.0                  | 69.6                    | 783390.6                 | 78668.2                 | 14888384.0        | 6558627.9                 | 419773.0                       | 417363.7              | 230974.8              | 25276.6                 | 4494.8                        | 3525.4                         | 4880.6                          | 6765508.0                 | 1078092.7                   | 2280.1                      | 57630.6                             | 54897.6                         | 1131.2                           |  |  |
| 101051.8               | 46134.3              | 20716.6                 | 12975.2              | 96569.1                  | 36.6                    | 781770.0                 | 83391.9                 | 14392801.9        | 6144138.0                 | 396579.4                       | 336093.9              | 143419.3              | 19889.9                 | 3003.5                        | 2588.2                         | 3098.1                          | 6222174.5                 | 987848.2                    | 1620.9                      | 38059.4                             | 53080.6                         | 654.0                            |  |  |
| 102829.1               | 46762.5              | 20565.9                 | 10399.1              | 82255.8                  | 34.7                    | 812606.8                 | 79818.9                 | 14711166.8        | 6589971.6                 | 423766.6                       | 350154.2              | 149760.8              | 22303.4                 | 3829.1                        | 3350.4                         | 3929.8                          | 6420443.3                 | 1014541.2                   | 1850.7                      | 40573.6                             | 56623.3                         | 653.5                            |  |  |
| 102123.8               | 49013.9              | 21626.7                 | 11098.6              | 105741.5                 | 28.6                    | 803795.0                 | 86814.9                 | 14622309.2        | 5675711.7                 | 360246.7                       | 319075.4              | 124026.0              | 20024.6                 | 2871.9                        | 2342.4                         | 2725.7                          | 6508777.0                 | 1056814.4                   | 1296.0                      | 30707.2                             | 47297.6                         | 535.7                            |  |  |
| 98894.5                | 47154.9              | 20814.6                 | 10229.3              | 71059.9                  | 24.9                    | 666974.2                 | 86215.3                 | 13417919.1        | 5873262.7                 | 377967.7                       | 300799.8              | 115259.4              | 18986.1                 | 2443.9                        | 2128.0                         | 2458.6                          | 6251243.1                 | 1014266.9                   | 1203.9                      | 28653.6                             | 48299.0                         | 461.9                            |  |  |
| 102402.9               | 48034.7              | 21431.6                 | 11390.8              | 82699.3                  | 40.3                    | 735957.8                 | 75782.9                 | 14003173.7        | 6082845.4                 | 388683.2                       | 350117.0              | 162603.3              | 23482.2                 | 3669.8                        | 2981.0                         | 3603.9                          | 6272494.5                 | 1030587.6                   | 1794.1                      | 42099.4                             | 48726.8                         | 737.9                            |  |  |
| 94873.7                | 44227.4              | 20090.5                 | 11918.4              | 87361.4                  | 25.5                    | 705907.7                 | 74103.6                 | 13151476.6        | 5433218.4                 | 348304.7                       | 293197.7              | 116334.5              | 18924.1                 | 2582.1                        | 2231.8                         | 2470.3                          | 5905382.1                 | 934885.3                    | 1321.4                      | 30080.4                             | 45641.4                         | 494.6                            |  |  |
| 98158.7                | 48536.5              | 21709.0                 | 9927.9               | 67267.0                  | 23.6                    | 599070.8                 | 62372.3                 | 12672454.1        | 5145452.9                 | 326665.4                       | 286774.2              | 112362.0              | 19716.1                 | 2567.3                        | 2197.0                         | 2451.2                          | 6178169.3                 | 1030085.0                   | 1368.5                      | 29423.6                             | 41740.8                         | 495.3                            |  |  |
| 114878.3               | 53648.3              | 24378.7                 | 12922.6              | 100044.4                 | 21.2                    | 842775.6                 | 87962.3                 | 15992464.7        | 6809035.9                 | 424222.6                       | 331271.5              | 109702.8              | 21594.1                 | 2612.8                        | 2410.1                         | 2490.0                          | 7083723.0                 | 1143839.8                   | 1292.8                      | 28102.1                             | 55961.1                         | 416.7                            |  |  |
| 109092.0               | 51326.2              | 22966.7                 | 14227.4              | 109937.8                 | 23.6                    | 842382.0                 | 89630.2                 | 15350614.9        | 6107867.2                 | 388916.8                       | 325149.4              | 171748.7              | 21788.4                 | 2783.3                        | 2661.9                         | 6719662.3                       | 1060240.3                 | 1403.1                      | 31538.1                     | 51792.0                             | 473.3                           |                                  |  |  |
| 96839.3                | 43540.9              | 19867.6                 | 12680.5              | 108199.3                 | 19.5                    | 819097.0                 | 88518.5                 | 14238242.6        | 5859965.3                 | 373605.0                       | 292804.6              | 99766.6               | 18795.8                 | 2357.9                        | 2219.3                         | 2265.7                          | 5875669.5                 | 932180.5                    | 1170.8                      | 28220.6                             | 49840.0                         | 382.8                            |  |  |
| 97129.2                | 43623.2              | 19994.9                 | 13457.3              | 102170.4                 | 24.7                    | 791012.9                 | 84875.9                 | 13993964.0        | 5849072.1                 | 372808.2                       | 302620.6              | 113449.7              | 19885.0                 | 2775.0                        | 2541.4                         | 2891.2                          | 5831215.8                 | 928591.1                    | 1393.0                      | 30520.4                             | 48911.7                         | 467.8                            |  |  |
| 110366.5               | 50209.2              | 22133.2                 | 13061.8              | 87795.6                  | 31.6                    | 822575.1                 | 83241.0                 | 15329730.7        | 6994465.4                 | 446499.8                       | 358361.4              | 147713.2              | 23375.6                 | 3520.5                        | 3074.9                         | 3672.6                          | 6776889.3                 | 1067900.4                   | 1572.5                      | 37794.0                             | 58254.7                         | 604.5                            |  |  |
| 108521.3               | 50874.5              | 23056.1                 | 12479.0              | 93165.5                  | 15.1                    | 806600.9                 | 85312.2                 | 15088579.8        | 6587720.3                 | 404461.4                       | 317007.5              | 105658.3              | 25505.4                 | 2618.1                        | 2578.7                         | 2435.5                          | 6739526.4                 | 1075030.3                   | 1240.6                      | 31115.8                             | 51543.0                         | 342.4                            |  |  |
| 97577.5                | 42887.1              | 19413.2                 | 12041.2              | 107761.1                 | 17.6                    | 842751.4                 | 92318.3                 | 14537205.5        | 6412866.5                 | 398719.5                       | 295615.7              | 94796.7               | 21068.8                 | 2540.3                        | 2423.7                         | 2532.8                          | 5868595.7                 | 918707.6                    | 1199.4                      | 27654.7                             | 52043.7                         | 379.8                            |  |  |
| 90709.0                | 41846.6              | 19587.0                 | 10035.5              | 99132.8                  | 14.6                    | 757566.3                 | 81966.5                 | 13277483.7        | 5371851.0                 | 333453.2                       | 264359.8              | 83367.9               | 18666.6                 | 2168.0                        | 2168.8                         | 2146.1                          | 5656797.1                 | 891757.1                    | 1153.0                      | 25231.6                             | 43838.3                         | 329.9                            |  |  |
| 94252.7                | 43304.4              | 19370.2                 | 9963.1               | 79227.2                  | 19.9                    | 689776.6                 | 72657.4                 | 13053492.9        | 5625894.0                 | 363273.5                       | 291078.3              | 108959.4              | 19100.1                 | 2563.7                        | 2253.4                         | 2317.8                          | 5730989.3                 | 922767.4                    | 1325.0                      | 28515.7                             | 47692.7                         | 398.9                            |  |  |
| 105282.7               | 50545.2              | 22551.5                 | 13294.7              | 78433.5                  | 30.4                    | 691126.2                 | 70252.8                 | 14604399.3        | 6009209.9                 | 378590.7                       | 321842.3              | 131082.0              | 21477.0                 | 2920.8                        | 2526.8                         | 2957.9                          | 6557593.6                 | 1075064.7                   | 1487.8                      | 34044.1                             | 48556.1                         | 589.2                            |  |  |
| 102946.1               | 49927.4              | 22309.2                 | 11069.5              | 98644.7                  | 19.9                    | 759165.1                 | 82061.5                 | 14350842.9        | 5859874.8                 | 361173.8                       | 291448.7              | 97841.4               | 20074.4                 | 2270.1                        | 2143.8                         | 2129.7                          | 6505706.8                 | 1057799.6                   | 1120.9                      | 25252.0                             | 45089.4                         | 388.5                            |  |  |
| 105902.7               | 48375.0              | 22410.9                 | 11771.4              | 90421.0                  | 20.6                    | 804317.8                 | 82541.8                 | 14797915.2        | 6316438.4                 | 408899.9                       | 326815.6              | 120145.9              | 21744.7                 | 2870.1                        | 2414.8                         | 2403.3                          | 6566862.4                 | 1057501.3                   | 1602.1                      | 33133.0                             | 53962.5                         | 393.2                            |  |  |
| 100951.6               | 46325.0              | 21138.2                 | 12440.2              | 95380.7                  | 17.9                    | 782020.4                 | 81413.4                 | 14474126.1        | 6368769.2                 | 391162.9                       | 284207.2              | 88192.7               | 18095.4                 | 2050.5                        | 2029.8                         | 2037.6                          | 6286511.0                 | 980784.2                    | 988.4                       | 22652.8                             | 50213.6                         | 358.4                            |  |  |
| 98091.2                | 45790.5              | 20488.2                 | 11685.8              | 111800.5                 | 26.6                    | 849997.1                 | 90534.3                 | 14482518.1        | 5736712.1                 | 358795.3                       | 318561.5              | 126402.2              | 22355.0                 | 3184.7                        | 2732.7                         | 3173.3                          | 6163723.8                 | 992055.3                    | 1467.8                      | 34382.4                             | 47745.2                         | 498.3                            |  |  |
| 106009.8               | 48828.8              | 22581.8                 | 12205.9              | 124633.8                 | 33.3                    | 944693.6                 | 100137.1                | 15747850.8        | 6075745.2                 | 375043.2                       | 345665.7              | 141073.0              | 24701.4                 | 3872.6                        | 3572.4                         | 3963.7                          | 6568372.1                 | 1034163.1                   | 1611.0                      | 36694.4                             | 51097.7                         | 617.5                            |  |  |
| 99402.5                | 47174.8              | 21343.7                 | 12163.0              | 117868.5                 | 19.4                    | 848520.4                 | 90621.1                 | 14590351.9        | 5500801.6                 | 334765.3                       | 284576.1              | 93439.3               | 19716.6                 | 2664.7                        | 2677.1                         | 2690.9                          | 6245877.6                 | 999860.2                    | 1229.2                      | 25469.1                             | 44378.8                         | 397.1                            |  |  |
| 113920.3               | 54674.9              | 25099.1                 | 11996.0              | 127846.5                 | 19.2                    | 935902.2                 | 100550.4                | 16608284.8        | 6304422.1                 | 387083.3                       | 322402.5              | 101050.3              | 22122.2                 | 2787.9                        | 2694.4                         | 2823.3                          | 7158573.8                 | 1152325.7                   | 1255.0                      | 26451.1                             | 50814.1                         | 380.8                            |  |  |
| 92458.5                | 41830.4              | 19665.8                 | 13184.5              | 114543.9                 | 18.4                    | 828129.5                 | 88168.6                 | 13965079.0        | 5588018.6                 | 344724.5                       | 271393.1              | 87179.2               | 17293.7                 | 2348.4                        | 2296.9                         | 2336.6                          | 5706409.1                 | 872332.8                    | 1002.7                      | 22225.6                             | 46737.8                         | 355.9                            |  |  |
| 105825.0               | 50483.3              | 22762.8                 | 12737.9              | 131269.7                 | 24.0                    | 905753.5                 | 99509.3                 | 15559490.9        | 5785570.1                 | 353095.8                       | 312792.3              | 110192.1              | 21326.6                 | 3005.1                        | 2886.4                         | 3094.3                          | 6576219.6                 | 1065498.7                   | 1268.6                      | 27982.9                             | 46754.6                         | 473.6                            |  |  |
| 103739.2               | 49135.0              | 22631.0                 | 10651.6              | 119321.9                 | 21.8                    | 894288.2                 | 94674.1                 | 15368228.2        | 5949354.4                 | 364940.1                       | 306972.4              | 103876.8              | 21786.6                 | 2950.2                        | 2680.5                         | 2884.4                          | 6528776.8                 | 1045318.9                   | 1289.6                      | 27827.4                             | 47523.4                         | 412.6                            |  |  |
| 117823.6               | 56604.3              | 25682.1                 | 11569.7              | 110484.9                 | 24.7                    | 929995.9                 | 93682.7                 | 16892384.8        | 6901239.5                 | 414090.3                       | 337293.1              | 112149.1              | 24795.3                 | 3505.7                        | 3433.4                         | 3743.1                          | 7437429.9                 | 1191726.7                   | 1419.4                      | 30794.0                             | 53092.7                         | 504.2                            |  |  |
| 106418.8               | 49838.1              | 22525.2                 | 12380.5              | 101732.1                 | 16.0                    | 847138.3                 | 85767.5                 | 15156394.7        | 6003814.0                 | 377021.1                       | 295128.2              | 86380.8               | 21312.3                 | 2987.9                        | 2986.0                         | 2953.1                          | 6589385.6                 | 1059884.4                   | 1326.5                      | 25507.3                             | 50955.6                         | 344.0                            |  |  |
| 90698.4                | 41557.6              | 18573.7                 | 10931.5              | 97571.7                  | 21.8                    | 774691.8                 | 80100.3                 | 13424810.9        | 5633589.8                 | 349119.9                       | 273244.3              | 94946.7               | 17638.3                 | 2527.2                        | 2386.1                         | 2571.1                          | 5639337.3                 | 879071.9                    | 1006.3                      | 23329.8                             | 45835.0                         | 413.5                            |  |  |
| 107422.2               | 50959.6              | 22819.3                 | 12061.8              | 121610.7                 | 20.1                    | 905884.9                 | 96170.5                 | 15827215.6        | 6246916.9                 | 383780.5                       | 299614.3              | 89118.0               | 19809.5                 | 2747.1                        | 2690.8                         | 2824.3                          | 6760006.5                 | 1067103.4                   | 1120.7                      | 23522.6                             | 50801.3                         | 390.2                            |  |  |
| 111842.8               | 53317.7              | 23845.6                 | 11468.5              | 114610.7                 | 16.4                    | 906743.0                 | 95072.8                 | 16215080.6        | 6318765.0                 | 388163.3                       | 307103.7              | 87094.1               | 21732.6                 | 2833.3                        | 2686.9                         | 2777.5                          | 7076028.4                 | 1125641.5                   | 1166.7                      | 23797.1                             | 52292.7                         | 350.2                            |  |  |
| 101518.6               | 50749.1              | 22476.0                 | 10902.2              | 103847.5                 | 19.3                    | 756866.9                 | 81577.4                 | 14128857.0        | 5239344.2                 | 320697.1                       | 284335.8              | 94895.0               | 20566.2                 | 3231.3                        | 2071.1                         | 2261.5                          | 6461428.5                 | 1071400.9                   | 1167.1                      | 27028.3                             | 40765.2                         | 384.4                            |  |  |
| 125342.5               | 63556.0              | 28196.1                 | 11852.4              | 118447.5                 | 25.1                    | 909630.2                 | 94735.7                 | 17286687.7        | 606287.6                  | 371907.9                       | 338385.6              | 106419.2              | 24236.7                 | 2678.9                        | 2561.1                         | 2771.8                          | 8116440.8                 | 1330112.3                   | 1246.5                      | 28895.0                             | 49729.8                         | 471.2                            |  |  |
| 112853.2               | 55981.0              | 24740.4                 | 9304.4               | 112716.4                 | 26.8                    | 881765.2                 | 92895.5                 | 16083959.9        | 5901841.3                 | 367578.6                       | 325946.9              | 111456.7              | 22909.0                 | 2966.2                        | 2609.8                         | 3005.8                          | 7283068.6                 | 1198003.1                   | 1195.6                      | 27943.8                             | 48586.9                         | 492.6                            |  |  |
| 100584.6               | 46944.6              | 21403.9                 | 8658.3               | 99866.8                  | 18.1                    | 856771.2                 | 87008.9                 | 14824860.7        | 5934710.8                 | 370720.7                       | 300654.9              | 99604.5               | 22247.1                 | 2648.4                        | 2525.1                         | 2529.2                          | 6402775.8                 | 1012443.0                   | 1247.7                      | 28468.4                             | 49191.9                         | 376.1                            |  |  |
| 97825.1                | 44995.7              | 20148.0                 | 10504.9              | 104560.9                 | 15.6                    | 865942.2                 | 87868.2                 | 14730594.7        | 5920495.6                 | 367805.8                       | 279541.3              | 78619.3               | 19496.9                 | 2503.0                        | 2350.8                         | 2505.4                          | 6121547.1                 | 980574.3                    | 1076.4                      | 22437.                              |                                 |                                  |  |  |

| 不飽和脂肪酸                           |                                   |                            |                                   |                                 |                             |                                   |                                   |                                   |                                   | 未同定<br>物質<br>(mg) | 利用可能炭水化物   |             |           |               |            |            |           |               |               |               | 糖アルコール        |  |
|----------------------------------|-----------------------------------|----------------------------|-----------------------------------|---------------------------------|-----------------------------|-----------------------------------|-----------------------------------|-----------------------------------|-----------------------------------|-------------------|------------|-------------|-----------|---------------|------------|------------|-----------|---------------|---------------|---------------|---------------|--|
| 20:3 n-6<br>イコサ<br>トリエン酸<br>(mg) | 20:4 n-3<br>イコサ<br>テトラエン酸<br>(mg) | 20:4 n-6<br>アラキドン酸<br>(mg) | 20:5 n-3<br>イコサ<br>ペンタエン酸<br>(mg) | 21:5 n-3<br>ヘンイコサ<br>ペンタエン酸(mg) | 22:2<br>ドコサ<br>ジエン酸<br>(mg) | 22:4 n-6<br>ドコサ<br>テトラエン酸<br>(mg) | 22:5 n-3<br>ドコサ<br>ペンタエン酸<br>(mg) | 22:5 n-6<br>ドコサ<br>ペンタエン酸<br>(mg) | 22:6 n-3<br>ドコサ<br>ヘキサエン酸<br>(mg) |                   | でん粉<br>(g) | ぶどう糖<br>(g) | 果糖<br>(g) | ガラクトース<br>(g) | しよ糖<br>(g) | 麦芽糖<br>(g) | 乳糖<br>(g) | トレハロース<br>(g) | 利用可能<br>炭水化物計 | ソルビトール<br>(g) | マンニトール<br>(g) |  |
| 22916.1                          | 9193.9                            | 103920.8                   | 77910.6                           | 2417.9                          | 167.2                       | 14092.7                           | 30861.5                           | 16562.5                           | 149133.3                          | 180492.9          | 76740.1    | 4245.0      | 4378.9    | 34.9          | 10373.7    | 685.3      | 3566.9    | 56.9          | 100093.8      | 130.5         | 193.6         |  |
| 23406.1                          | 12485.1                           | 104926.7                   | 97010.3                           | 3902.2                          | 285.1                       | 15865.1                           | 35451.3                           | 16827.4                           | 179893.8                          | 219604.4          | 92057.5    | 4272.7      | 4189.4    | 38.4          | 8372.5     | 663.2      | 3421.4    | 56.9          | 113087.8      | 96.1          | 195.5         |  |
| 23935.3                          | 14598.9                           | 119105.0                   | 128261.0                          | 4708.6                          | 335.9                       | 16523.3                           | 43027.1                           | 20563.7                           | 227900.5                          | 232725.2          | 85805.7    | 4560.1      | 5206.8    | 39.9          | 10954.4    | 620.7      | 2896.5    | 56.5          | 109974.9      | 182.6         | 250.3         |  |
| 23622.4                          | 16414.7                           | 114243.4                   | 126128.9                          | 4855.4                          | 381.9                       | 15753.7                           | 42598.6                           | 19095.7                           | 231177.8                          | 250504.1          | 90156.0    | 5032.5      | 6118.9    | 41.8          | 10779.5    | 744.2      | 3753.0    | 65.6          | 116726.3      | 261.7         | 297.4         |  |
| 23008.3                          | 11701.3                           | 106883.1                   | 92319.3                           | 3344.6                          | 255.9                       | 15091.4                           | 34385.5                           | 17514.9                           | 176117.5                          | 207492.0          | 71711.9    | 4429.3      | 4634.7    | 35.0          | 11010.0    | 678.7      | 3938.1    | 57.2          | 96508.0       | 180.9         | 254.7         |  |
| 23967.1                          | 13332.2                           | 118390.6                   | 114656.8                          | 4002.6                          | 295.5                       | 16466.4                           | 40600.9                           | 19795.1                           | 211459.4                          | 213538.7          | 67485.4    | 4682.9      | 4983.4    | 39.6          | 10753.7    | 637.0      | 3278.2    | 55.9          | 91945.7       | 175.2         | 262.6         |  |
| 22075.4                          | 10626.2                           | 103075.1                   | 84954.8                           | 2949.5                          | 216.2                       | 13638.2                           | 31561.5                           | 17606.7                           | 167221.3                          | 196508.7          | 77345.8    | 4121.9      | 4362.5    | 40.3          | 10577.4    | 677.2      | 3481.4    | 52.3          | 100668.4      | 157.1         | 234.2         |  |
| 20291.3                          | 10171.0                           | 98601.1                    | 78884.4                           | 2720.0                          | 234.8                       | 14094.4                           | 30948.4                           | 16818.1                           | 159796.4                          | 183370.8          | 72444.0    | 4158.4      | 4555.3    | 27.6          | 10911.0    | 592.2      | 3180.1    | 48.0          | 95916.4       | 242.1         | 192.2         |  |
| 21787.9                          | 13567.6                           | 104305.3                   | 111282.8                          | 3897.3                          | 301.8                       | 14339.2                           | 39297.0                           | 17477.4                           | 208792.1                          | 213942.1          | 67059.3    | 4296.3      | 4743.5    | 41.0          | 10656.6    | 650.1      | 3764.7    | 55.5          | 91292.3       | 190.1         | 213.1         |  |
| 20908.9                          | 10191.3                           | 97377.7                    | 83305.1                           | 2849.3                          | 180.5                       | 13357.6                           | 31613.4                           | 16323.8                           | 163832.8                          | 182809.7          | 80531.7    | 4221.3      | 4455.6    | 32.8          | 9369.5     | 659.0      | 3847.8    | 53.3          | 103178.7      | 165.1         | 193.3         |  |
| 17994.2                          | 9741.3                            | 88169.3                    | 81228.4                           | 2829.1                          | 171.8                       | 12180.8                           | 29944.6                           | 14936.4                           | 157046.0                          | 179044.7          | 79044.7    | 4260.6      | 4531.8    | 33.0          | 12824.5    | 590.8      | 2928.9    | 54.4          | 104282.5      | 165.1         | 225.0         |  |
| 24099.1                          | 10167.7                           | 106526.8                   | 84821.1                           | 2849.4                          | 173.6                       | 15661.7                           | 33928.3                           | 16542.0                           | 167099.9                          | 192755.7          | 78187.8    | 4463.2      | 4655.8    | 37.6          | 9059.2     | 711.0      | 3920.5    | 58.6          | 101137.0      | 130.9         | 198.1         |  |
| 24036.1                          | 11006.4                           | 105629.9                   | 93235.5                           | 3064.4                          | 189.6                       | 14591.8                           | 35451.2                           | 16596.0                           | 179825.2                          | 196763.4          | 72683.9    | 4676.0      | 4800.5    | 33.4          | 8843.9     | 712.7      | 4489.0    | 57.2          | 96308.4       | 182.7         | 194.9         |  |
| 22517.9                          | 9404.4                            | 95879.8                    | 79086.2                           | 2593.0                          | 156.1                       | 13740.7                           | 31371.5                           | 14560.7                           | 155549.4                          | 179862.1          | 67064.4    | 4319.9      | 4465.3    | 29.3          | 9010.7     | 666.9      | 3615.0    | 55.1          | 89243.1       | 124.1         | 191.8         |  |
| 22495.3                          | 10430.9                           | 98755.7                    | 89312.8                           | 2950.9                          | 173.5                       | 13846.9                           | 33936.3                           | 15164.0                           | 170441.4                          | 184876.4          | 68974.4    | 4451.3      | 4781.9    | 31.7          | 10352.6    | 699.9      | 3909.2    | 58.2          | 91241.0       | 155.9         | 221.4         |  |
| 24539.0                          | 14040.5                           | 113952.8                   | 114524.3                          | 3686.4                          | 302.9                       | 16460.6                           | 42437.5                           | 18031.9                           | 215768.6                          | 219313.6          | 81852.4    | 4942.6      | 4995.9    | 38.0          | 10636.3    | 746.1      | 4351.3    | 60.5          | 107536.0      | 228.0         | 257.4         |  |
| 23681.9                          | 12725.7                           | 119592.1                   | 112341.7                          | 2759.3                          | 182.3                       | 15353.2                           | 43745.2                           | 20121.0                           | 232211.4                          | 217536.1          | 98906.1    | 4547.4      | 4729.8    | 42.3          | 9910.1     | 744.0      | 3713.3    | 59.0          | 110665.5      | 190.6         | 255.7         |  |
| 23474.2                          | 10667.3                           | 107396.4                   | 95085.9                           | 2549.2                          | 148.1                       | 14690.6                           | 37407.7                           | 16785.1                           | 190618.9                          | 197134.8          | 70908.6    | 3954.5      | 4069.5    | 37.3          | 8932.1     | 774.9      | 3585.9    | 65.0          | 92035.7       | 124.0         | 229.7         |  |
| 20690.9                          | 9122.8                            | 98981.6                    | 81255.2                           | 2221.6                          | 133.3                       | 12651.0                           | 31330.1                           | 15522.7                           | 159180.6                          | 170541.0          | 83393.3    | 3845.7      | 3962.1    | 28.4          | 8676.3     | 632.5      | 3039.6    | 52.8          | 103628.6      | 131.1         | 195.5         |  |
| 19812.4                          | 9946.8                            | 88924.5                    | 83091.8                           | 2935.4                          | 189.0                       | 13337.7                           | 31918.9                           | 14132.1                           | 165287.9                          | 176124.3          | 79124.3    | 3993.3      | 3997.8    | 34.4          | 8936.8     | 630.7      | 3264.0    | 53.6          | 88040.5       | 100.8         | 176.5         |  |
| 21538.9                          | 11425.3                           | 103444.8                   | 92808.8                           | 3124.1                          | 227.4                       | 14071.1                           | 34263.9                           | 17086.1                           | 176528.5                          | 202084.4          | 71436.7    | 4157.5      | 4744.6    | 35.7          | 12926.6    | 738.4      | 4351.6    | 62.0          | 98469.5       | 171.3         | 245.7         |  |
| 21427.3                          | 9132.9                            | 100680.6                   | 77455.7                           | 2482.8                          | 153.0                       | 13318.8                           | 30559.5                           | 17206.1                           | 159615.2                          | 187731.5          | 80371.4    | 4495.5      | 4648.4    | 34.7          | 10520.3    | 704.6      | 3391.0    | 64.9          | 104241.5      | 113.2         | 215.8         |  |
| 23094.8                          | 11055.2                           | 107000.5                   | 95670.8                           | 3395.7                          | 162.1                       | 15365.6                           | 36440.5                           | 17375.3                           | 195848.8                          | 202777.5          | 94007.7    | 4258.8      | 4098.6    | 41.4          | 9725.3     | 668.1      | 3423.9    | 57.3          | 116291.6      | 90.6          | 210.4         |  |
| 22743.0                          | 8381.9                            | 104061.5                   | 88896.8                           | 2212.4                          | 130.1                       | 14437.5                           | 28990.1                           | 16982.3                           | 139582.3                          | 195988.1          | 82373.3    | 4485.5      | 4468.2    | 37.3          | 9336.9     | 791.0      | 3821.7    | 63.5          | 105384.0      | 103.8         | 175.8         |  |
| 23614.5                          | 12494.9                           | 109938.8                   | 104514.1                          | 3305.6                          | 202.7                       | 13872.6                           | 38636.9                           | 18680.9                           | 203299.4                          | 202772.2          | 68886.6    | 4402.9      | 4424.0    | 39.8          | 10286.7    | 640.6      | 4034.4    | 49.4          | 92769.4       | 146.3         | 205.7         |  |
| 25277.8                          | 13605.3                           | 115339.5                   | 117714.7                          | 3722.0                          | 207.7                       | 14594.2                           | 42922.5                           | 18854.6                           | 217938.9                          | 207426.1          | 87395.6    | 4944.4      | 5046.0    | 37.9          | 12582.3    | 818.3      | 3654.0    | 61.7          | 114551.4      | 137.4         | 287.3         |  |
| 22812.3                          | 9327.2                            | 102438.5                   | 83587.2                           | 2607.1                          | 135.3                       | 12788.7                           | 31578.2                           | 16587.5                           | 157453.6                          | 180254.4          | 74232.2    | 4666.0      | 4763.7    | 35.3          | 10489.1    | 785.1      | 3626.3    | 67.8          | 98674.4       | 119.3         | 222.4         |  |
| 25100.3                          | 10357.8                           | 111552.7                   | 88141.1                           | 2825.3                          | 158.3                       | 14644.4                           | 34895.0                           | 18366.1                           | 171102.1                          | 197371.8          | 82705.8    | 4425.3      | 4403.5    | 32.9          | 9683.9     | 729.6      | 3835.6    | 58.9          | 105892.7      | 101.0         | 228.5         |  |
| 23076.3                          | 8744.8                            | 99465.9                    | 71999.8                           | 2357.4                          | 119.0                       | 13257.7                           | 29674.4                           | 15846.7                           | 140225.0                          | 172193.5          | 77057.1    | 4082.4      | 4185.5    | 28.2          | 9705.3     | 691.1      | 4025.1    | 56.9          | 99842.5       | 101.4         | 167.6         |  |
| 24042.2                          | 10701.6                           | 105743.7                   | 90255.4                           | 2953.2                          | 173.3                       | 13429.3                           | 34261.6                           | 17538.6                           | 171796.0                          | 196333.6          | 73558.7    | 4929.1      | 5164.4    | 36.7          | 12183.0    | 724.4      | 3845.2    | 58.4          | 100511.6      | 146.4         | 208.9         |  |
| 23947.0                          | 10411.5                           | 108066.9                   | 91560.6                           | 2882.0                          | 144.2                       | 13828.2                           | 34882.0                           | 17974.6                           | 176878.2                          | 183269.7          | 81116.2    | 4490.6      | 4632.4    | 31.0          | 12238.6    | 727.4      | 3492.0    | 59.3          | 106797.0      | 136.2         | 193.0         |  |
| 26088.6                          | 11576.3                           | 127522.6                   | 108886.6                          | 3349.6                          | 181.6                       | 16064.9                           | 40015.5                           | 21662.9                           | 197113.4                          | 221461.6          | 82206.9    | 4506.4      | 4814.3    | 41.9          | 12033.2    | 787.9      | 3822.3    | 59.1          | 108282.7      | 244.0         | 154.5         |  |
| 23987.7                          | 9708.0                            | 109958.8                   | 90397.5                           | 2689.8                          | 240.7                       | 14503.0                           | 35353.2                           | 17070.5                           | 165659.1                          | 175928.2          | 71214.9    | 4179.1      | 4294.5    | 34.4          | 11070.1    | 695.5      | 3973.0    | 61.6          | 95543.1       | 155.2         | 233.7         |  |
| 21629.2                          | 9011.3                            | 98643.8                    | 74284.6                           | 2458.8                          | 147.1                       | 13074.4                           | 29549.0                           | 15680.9                           | 143049.6                          | 171073.8          | 66617.1    | 4155.7      | 4077.0    | 34.9          | 9263.5     | 760.7      | 3492.2    | 51.5          | 88455.5       | 118.8         | 150.9         |  |
| 24746.5                          | 9060.1                            | 108355.1                   | 80398.9                           | 2681.9                          | 125.6                       | 14489.6                           | 31810.3                           | 17463.9                           | 148637.7                          | 180807.4          | 73808.1    | 4614.1      | 4813.4    | 35.6          | 10609.2    | 734.9      | 3862.3    | 55.5          | 98543.3       | 116.8         | 174.3         |  |
| 24801.6                          | 9529.0                            | 114951.4                   | 86913.2                           | 2617.2                          | 116.8                       | 14981.6                           | 34648.2                           | 18791.8                           | 165891.1                          | 176865.1          | 74564.7    | 3902.1      | 4079.5    | 34.7          | 9504.1     | 683.8      | 3716.8    | 55.3          | 96554.0       | 126.3         | 188.5         |  |
| 20747.7                          | 9414.3                            | 94843.4                    | 77629.5                           | 2337.7                          | 137.8                       | 11883.1                           | 30371.0                           | 15734.9                           | 152914.5                          | 171649.2          | 68768.8    | 3873.1      | 4041.1    | 30.4          | 9885.4     | 660.1      | 3587.0    | 53.0          | 90913.5       | 108.6         | 153.8         |  |
| 24799.6                          | 10252.8                           | 113686.3                   | 86306.8                           | 2580.8                          | 148.3                       | 14357.4                           | 34396.7                           | 18497.5                           | 165487.9                          | 192252.8          | 82712.6    | 4372.1      | 4548.0    | 34.7          | 11645.9    | 913.2      | 3968.8    | 55.5          | 108251.5      | 125.1         | 213.3         |  |
| 23291.6                          | 10236.2                           | 106259.9                   | 86742.8                           | 2828.3                          | 154.1                       | 13974.0                           | 33929.1                           | 17767.1                           | 167977.9                          | 181649.8          | 71505.7    | 3961.0      | 3924.1    | 29.5          | 10795.4    | 680.0      | 2966.1    | 50.4          | 93916.1       | 93.5          | 195.5         |  |
| 23391.3                          | 10498.9                           | 113147.4                   | 95047.2                           | 2745.7                          | 133.8                       | 14613.1                           | 36457.3                           | 19296.5                           | 193013.7                          | 191679.4          | 74328.0    | 3797.7      | 3990.9    | 35.0          | 9544.8     | 622.9      | 2633.2    | 46.5          | 95010.4       | 120.4         | 186.8         |  |
| 23214.9                          | 8492.1                            | 104966.3                   | 80146.7                           | 2322.0                          | 94.2                        | 13750.3                           | 31271.9                           | 16149.4                           | 149099.6                          | 164116.1          | 58143.2    | 4088.7      | 4173.7    | 30.6          | 8641.9     | 536.4      | 3065.8    | 49.3          | 78747.1       | 118.7         | 158.0         |  |
| 24081.4                          | 9919.9                            | 108551.3                   | 90082.8                           | 2857.6                          | 119.2                       | 13913.3                           | 35128.5                           | 17305.6                           | 165959.6                          | 178437.7          | 75745.3    | 4313.9      | 4385.7    | 36.3          | 10147.4    | 634.2      | 3281.9    | 54.7          | 9861          |               |               |  |

|            |         |                       |    |     |
|------------|---------|-----------------------|----|-----|
| Data:      | X       | dimension:            | 53 | 109 |
|            | Y       | dimension:            | 53 | 1   |
| Fit        | method: | kernelpls             |    |     |
| Number of  |         | components considered |    | 52  |
| TRAINING % |         | variance explained    |    |     |

[illegible]

| No. | intake | 和名  |
|-----|--------|-----|
| 1   | ...    | ... |
| 2   | ...    | ... |
| 3   | ...    | ... |
| 4   | ...    | ... |
| 5   | ...    | ... |
| 6   | ...    | ... |
| 7   | ...    | ... |
| 8   | ...    | ... |
| 9   | ...    | ... |
| 10  | ...    | ... |
| 11  | ...    | ... |
| 12  | ...    | ... |
| 13  | ...    | ... |
| 14  | ...    | ... |
| 15  | ...    | ... |
| 16  | ...    | ... |
| 17  | ...    | ... |
| 18  | ...    | ... |
| 19  | ...    | ... |
| 20  | ...    | ... |
| 21  | ...    | ... |
| 22  | ...    | ... |
| 23  | ...    | ... |
| 24  | ...    | ... |
| 25  | ...    | ... |
| 26  | ...    | ... |
| 27  | ...    | ... |
| 28  | ...    | ... |
| 29  | ...    | ... |
| 30  | ...    | ... |
| 31  | ...    | ... |
| 32  | ...    | ... |
| 33  | ...    | ... |
| 34  | ...    | ... |
| 35  | ...    | ... |
| 36  | ...    | ... |
| 37  | ...    | ... |
| 38  | ...    | ... |
| 39  | ...    | ... |
| 40  | ...    | ... |
| 41  | ...    | ... |
| 42  | ...    | ... |
| 43  | ...    | ... |
| 44  | ...    | ... |
| 45  | ...    | ... |
| 46  | ...    | ... |
| 47  | ...    | ... |
| 48  | ...    | ... |
| 49  | ...    | ... |
| 50  | ...    | ... |
| 51  | ...    | ... |
| 52  | ...    | ... |
| 53  | ...    | ... |
| 54  | ...    | ... |
| 55  | ...    | ... |
| 56  | ...    | ... |
| 57  | ...    | ... |
| 58  | ...    | ... |
| 59  | ...    | ... |
| 60  | ...    | ... |
| 61  | ...    | ... |
| 62  | ...    | ... |
| 63  | ...    | ... |
| 64  | ...    | ... |
| 65  | ...    | ... |
| 66  | ...    | ... |
| 67  | ...    | ... |
| 68  | ...    | ... |
| 69  | ...    | ... |
| 70  | ...    | ... |
| 71  | ...    | ... |
| 72  | ...    | ... |
| 73  | ...    | ... |
| 74  | ...    | ... |
| 75  | ...    | ... |
| 76  | ...    | ... |
| 77  | ...    | ... |
| 78  | ...    | ... |
| 79  | ...    | ... |
| 80  | ...    | ... |
| 81  | ...    | ... |
| 82  | ...    | ... |
| 83  | ...    | ... |
| 84  | ...    | ... |
| 85  | ...    | ... |
| 86  | ...    | ... |
| 87  | ...    | ... |
| 88  | ...    | ... |
| 89  | ...    | ... |
| 90  | ...    | ... |
| 91  | ...    | ... |
| 92  | ...    | ... |
| 93  | ...    | ... |
| 94  | ...    | ... |
| 95  | ...    | ... |
| 96  | ...    | ... |
| 97  | ...    | ... |
| 98  | ...    | ... |
| 99  | ...    | ... |
| 100 | ...    | ... |

|    |                  |                 |           |           |           |           |           |           |           |           |           |           |           |           |           |           |           |           |           |           |           |           |           |           |           |           |           |           |           |           |           |           |           |           |           |          |          |           |          |
|----|------------------|-----------------|-----------|-----------|-----------|-----------|-----------|-----------|-----------|-----------|-----------|-----------|-----------|-----------|-----------|-----------|-----------|-----------|-----------|-----------|-----------|-----------|-----------|-----------|-----------|-----------|-----------|-----------|-----------|-----------|-----------|-----------|-----------|-----------|-----------|----------|----------|-----------|----------|
| 1  | intake11 菜       | Rice            | 0.085665  | -0.046777 | -0.121878 | 0.020477  | -0.0339   | -0.045249 | -0.0831   | 0.036257  | -0.197255 | -0.095858 | 0.083011  | -0.062937 | 0.171119  | -0.70334  | -0.764408 | -0.03493  | 0.121714  | -0.036822 | -0.16601  | 0.297481  | -0.34836  | -0.111412 | -0.15309  | 0.275338  | 0.037649  | -0.24991  | 0.131305  | -0.09843  | 0.062546  | -0.1208   | 0.09083   | 0.153271  | -0.01852  | -0.02918 |          |           |          |
| 2  | intake12 肉       | Meat            | 0.007735  | -0.000000 | -0.000000 | -0.000000 | -0.000000 | -0.000000 | -0.000000 | -0.000000 | -0.000000 | -0.000000 | -0.000000 | -0.000000 | -0.000000 | -0.000000 | -0.000000 | -0.000000 | -0.000000 | -0.000000 | -0.000000 | -0.000000 | -0.000000 | -0.000000 | -0.000000 | -0.000000 | -0.000000 | -0.000000 | -0.000000 | -0.000000 | -0.000000 | -0.000000 | -0.000000 | -0.000000 |           |          |          |           |          |
| 3  | intake13 魚       | Seafood         | 0.000000  | 0.000000  | 0.000000  | 0.000000  | 0.000000  | 0.000000  | 0.000000  | 0.000000  | 0.000000  | 0.000000  | 0.000000  | 0.000000  | 0.000000  | 0.000000  | 0.000000  | 0.000000  | 0.000000  | 0.000000  | 0.000000  | 0.000000  | 0.000000  | 0.000000  | 0.000000  | 0.000000  | 0.000000  | 0.000000  | 0.000000  | 0.000000  | 0.000000  | 0.000000  | 0.000000  | 0.000000  |           |          |          |           |          |
| 4  | intake14 穀類・豆・雑穀 | "Grains"        | 0.159382  | -0.00041  | 0.103016  | -0.06006  | 0.00590   | -0.01335  | 0.123225  | 0.14237   | -0.1132   | -0.16469  | 0.34042   | -0.21383  | -0.02816  | 0.025043  | -0.05074  | 0.20719   | 0.023519  | 0.017706  | -0.00861  | -0.18721  | 0.035878  | 0.10252   | 0.034611  | -0.13048  | 0.104244  | -0.03514  | 0.051762  | -0.08354  | 0.090884  | -0.16579  | 0.052769  | 0.003185  | -0.14142  | -0.06485 | 0.214416 | -0.11709  |          |
| 5  | intake15 ヲシロイ    | Spaghetti       | 0.110023  | -0.12524  | 0.030005  | 0.069759  | -0.23395  | -0.07793  | 0.03793   | 0.153613  | -0.11034  | -0.09429  | 0.19496   | -0.02355  | -0.01919  | 0.220852  | 0.023637  | -0.11315  | 0.203825  | -0.20578  | 0.07887   | -0.20472  | 0.12512   | 0.048822  | 0.07378   | -0.00632  | 0.17848   | -0.07282  | 0.01815   | 0.067928  | -0.02926  | -0.01231  | -0.03258  | 0.096773  | -0.11586  | 0.04947  | -0.11709 |           |          |
| 6  | intake16 中華めし    | Chinese food    | 0.131063  | -0.18914  | 0.193486  | -0.000042 | -0.00599  | -0.19698  | 0.07783   | 0.032777  | -0.03814  | -0.02634  | 0.019438  | 0.017034  | 0.007934  | 0.05595   | 0.014348  | -0.11762  | -0.0635   | -0.06746  | 0.015712  | 0.033043  | 0.02484   | -0.07808  | 0.183543  | -0.13293  | 0.066512  | 0.124272  | -0.02307  | -0.07108  | 0.08688   | 0.014734  | -0.12763  | 0.02192   | 0.14971   | -0.1396  | -0.10107 | -0.11709  |          |
| 7  | intake17 小麦粉     | Wheat flour     | -0.282482 | -0.00019  | 0.193546  | -0.111915 | -0.12687  | -0.14879  | -0.11814  | 0.07956   | 0.24706   | -0.00624  | 0.076554  | -0.12892  | -0.00928  | 0.069366  | 0.122287  | -0.04392  | 0.06557   | 0.142607  | -0.18534  | 0.178713  | 0.189861  | -0.07501  | -0.1547   | -0.08621  | -0.00868  | -0.00853  | -0.225033 | -0.14268  | -0.05635  | -0.167764 | -0.01005  | -0.03974  | 0.082204  | -0.18897 | -0.11395 | -0.246278 |          |
| 8  | intake18 揚げ物     | Fried food      | 0.011814  | -0.000000 | -0.000000 | -0.000000 | -0.000000 | -0.000000 | -0.000000 | -0.000000 | -0.000000 | -0.000000 | -0.000000 | -0.000000 | -0.000000 | -0.000000 | -0.000000 | -0.000000 | -0.000000 | -0.000000 | -0.000000 | -0.000000 | -0.000000 | -0.000000 | -0.000000 | -0.000000 | -0.000000 | -0.000000 | -0.000000 | -0.000000 | -0.000000 | -0.000000 | -0.000000 | -0.000000 | -0.000000 |          |          |           |          |
| 9  | intake19 豆       | Tuna fish       | 0.06113   | -0.15814  | 0.192806  | -0.08821  | 0.163017  | -0.02465  | -0.06515  | -0.11728  | 0.23858   | -0.04675  | -0.12634  | 0.13663   | 0.07205   | 0.250554  | -0.12522  | 0.082441  | -0.06436  | 0.04253   | 0.056391  | #####     | -0.102904 | -0.01163  | 0.009045  | 0.02459   | -0.08415  | -0.06257  | 0.032587  | -0.02199  | 0.058144  | 0.003475  | -0.09199  | -0.05229  | 0.026479  | -0.08105 | 0.06968  | 0.04947   | -0.07979 |
| 10 | intake110 あじ     | Horse mackerel  | -0.05524  | 0.15831   | -0.113    | 0.032042  | -0.15316  | 0.211289  | -0.06214  | 0.147419  | -0.01786  | 0.071793  | -0.15062  | 0.023427  | 0.040972  | -0.08435  | 0.028467  | -0.15891  | 0.074713  | -0.0324   | 0.061391  | -0.00139  | -0.13655  | 0.103379  | -0.11553  | 0.021473  | -0.0157   | 0.120248  | -0.1277   | 0.052114  | -0.06943  | 0.042624  | 0.034427  | 0.032513  | -0.00637  | 0.10556  | -0.11458 | -0.17463  |          |
| 11 | intake111 いわし    | Sardines        | 0.083662  | 0.149076  | -0.18078  | 0.142413  | -0.13511  | 0.141195  | -0.07825  | 0.081623  | -0.11888  | 0.076404  | -0.12907  | 0.168596  | -0.20093  | -0.05143  | 0.027171  | -0.13237  | -0.04168  | 0.085658  | -0.0335   | -0.01103  | 0.042172  | 0.022889  | -0.04094  | 0.158286  | -0.24405  | 0.030405  | 0.0283    | -0.02348  | -0.06352  | 0.13017   | 0.007487  | -0.08005  | -0.02286  | -0.00062 | -0.01431 | 0.03776   |          |
| 12 | intake112 かぶ     | Banano          | -0.01155  | 0.025955  | 0.000312  | -0.01002  | 0.054989  | 0.00052   | 0.01072   | -0.2087   | 0.134458  | -0.12166  | 0.117671  | -0.1439   | -0.15309  | 0.052358  | -0.16249  | -0.04859  | 0.021234  | -0.3778   | 0.01955   | -0.03464  | -0.02993  | -0.00467  | -0.18816  | 0.21288   | -0.27998  | 0.051512  | 0.0348    | -0.02948  | -0.187731 | -0.02264  | -0.06172  | 0.220274  | -0.1512   | -0.0481  | -0.07185 |           |          |
| 13 | intake113 かいひ    | Yellowtail      | 0.059116  | 0.061332  | -0.21888  | 0.17079   | -0.0455   | -0.10648  | 0.078904  | 0.28684   | 0.030389  | -0.163022 | 0.02108   | 0.063437  | -0.12794  | 0.011954  | 0.082628  | -0.05877  | -0.06571  | 0.156679  | -0.16167  | 0.064816  | 0.058261  | -0.07057  | 0.040398  | 0.004468  | 0.06251   | 0.039876  | 0.01179   | 0.004341  | 0.089193  | -0.12181  | 0.001371  | -0.14029  | 0.13768   | -0.10636 | 0.056644 | 0.063071  |          |
| 14 | intake114 かつお    | Ostracods       | 0.011814  | -0.000000 | -0.000000 | -0.000000 | -0.000000 | -0.000000 | -0.000000 | -0.000000 | -0.000000 | -0.000000 | -0.000000 | -0.000000 | -0.000000 | -0.000000 | -0.000000 | -0.000000 | -0.000000 | -0.000000 | -0.000000 | -0.000000 | -0.000000 | -0.000000 | -0.000000 | -0.000000 | -0.000000 | -0.000000 | -0.000000 | -0.000000 | -0.000000 | -0.000000 | -0.000000 | -0.000000 | -0.000000 |          |          |           |          |
| 15 | intake115 さい     | Flounder        | -0.05335  | 0.136456  | -0.1423   | 0.113997  | -0.06896  | 0.134555  | -0.1575   | 0.224955  | -0.09924  | -0.000000 | -0.01967  | 0.029276  | -0.1113   | 0.098622  | 0.067567  | -0.08825  | -0.01275  | 0.071801  | -0.00862  | 0.027897  | 0.032623  | 0.014772  | -0.09402  | 0.034583  | 0.031967  | 0.1151    | -0.1981   | 0.1208    | 0.090016  | -0.12605  | 0.017435  | 0.000301  | 0.091918  | -0.08848 | -0.05669 | 0.050071  |          |
| 16 | intake116 さんま    | Saury           | 0.187254  | -0.05427  | -0.00452  | -0.01004  | 0.059406  | -0.18658  | 0.024176  | 0.048704  | 0.042421  | -0.25403  | 0.211842  | 0.012948  | -0.076    | 0.05559   | 0.055915  | 0.044123  | 0.098036  | -0.13439  | -0.1449   | 0.088393  | 0.11752   | 0.083483  | -0.1346   | -0.02997  | 0.016278  | 0.153856  | -0.04677  | -0.04857  | -0.1048   | 0.058272  | 0.015056  | -0.12104  | 0.00849   | 0.028325 | -0.07591 | -0.00421  |          |
| 17 | intake117 たい     | Sea bream       | -0.11312  | 0.157567  | -0.11888  | -0.152731 | -0.04564  | 0.048582  | -0.20825  | 0.128899  | -0.03259  | 0.030762  | 0.11113   | -0.0888   | 0.009006  | -0.17373  | 0.143408  | -0.00498  | 0.04503   | -0.15417  | 0.132465  | -0.00717  | 0.058754  | 0.141605  | -0.0705   | 0.039425  | -0.0303   | 0.02435   | -0.0139   | -0.04946  | 0.063936  | 0.110921  | -0.01822  | -0.04466  | 0.137117  | 0.086872 | -0.00902 | -0.14945  |          |
| 18 | intake118 ぶり     | Yellowtail      | -0.01075  | 0.1137    | -0.12582  | -0.14767  | -0.19809  | 0.200071  | 0.014644  | -0.09819  | 0.14737   | 0.056408  | -0.10374  | 0.006915  | -0.13437  | 0.063428  | -0.02724  | 0.035355  | 0.060458  | -0.18937  | 0.150666  | 0.006399  | -0.17438  | 0.19297   | 0.007564  | -0.20206  | 0.317094  | -0.18587  | 0.131243  | -0.14873  | 0.037327  | 0.005979  | 0.031555  | -0.00579  | -0.134    | -0.03878 | -0.0377  | -0.1983   |          |
| 19 | intake119 いか     | Octopus         | 0.175529  | -0.000000 | -0.000000 | -0.000000 | -0.000000 | -0.000000 | -0.000000 | -0.000000 | -0.000000 | -0.000000 | -0.000000 | -0.000000 | -0.000000 | -0.000000 | -0.000000 | -0.000000 | -0.000000 | -0.000000 | -0.000000 | -0.000000 | -0.000000 | -0.000000 | -0.000000 | -0.000000 | -0.000000 | -0.000000 | -0.000000 | -0.000000 | -0.000000 | -0.000000 | -0.000000 | -0.000000 | -0.000000 |          |          |           |          |
| 20 | intake120 たらこ    | Shrimps & kabe  | 0.052871  | -0.0939   | -0.11873  | 0.226268  | 0.014247  | -0.0678   | 0.06666   | 0.02865   | -0.27398  | 0.068373  | -0.07883  | 0.069573  | 0.171638  | -0.0505   | -0.0082   | 0.023223  | -0.18744  | -0.02515  | 0.07718   | -0.08832  | 0.080569  | -0.17141  | -0.19157  | 0.064506  | -0.05449  | -0.06343  | -0.06924  | 0.06818   | 0.20468   | -0.060    | -0.0004   | -0.00595  | -0.04491  | -0.17079 |          |           |          |
| 21 | intake121 えび     | Shrimps & kabe  | 0.023991  | 0.080435  | -0.16664  | -0.05298  | 0.21812   | 0.046874  | -0.05477  | -0.05197  | 0.153769  | -0.03261  | -0.02667  | -0.0426   | -0.0774   | 0.034328  | 0.030030  | 0.10494   | -0.11377  | -0.02055  | 0.104351  | -0.0248   | 0.074518  | 0.166821  | -0.18346  | 0.006655  | -0.04449  | -0.16223  | 0.059166  | 0.172526  | -0.0209   | -0.1717   | -0.02865  | 0.158309  | -0.0541   | 0.056245 | -0.0492  | 0.05566   |          |
| 22 | intake122 か      | Crabs           | -0.10369  | -0.083487 | -0.13345  | 0.162593  | -0.06521  | 0.050625  | -0.03176  | -0.14493  | -0.1196   | 0.020075  | -0.13701  | 0.135642  | -0.13924  | -0.07464  | 0.130345  | -0.06445  | -0.05577  | 0.020603  | -0.15806  | -0.04826  | 0.137457  | -0.17673  | 0.028489  | -0.15771  | 0.064928  | -0.0207   | 0.091199  | -0.15614  | 0.077833  | 0.01504   | -0.00359  | -0.1697   | 0.06248   | -0.00193 | -0.17125 | -0.09454  |          |
| 23 | intake123 あさり    | Short-necked    | 0.006469  | -0.0077   | 0.02513   | -0.07511  | -0.15036  | 0.232396  | -0.03197  | 0.067733  | -0.02098  | 0.136872  | -0.03516  | -0.06992  | -0.07963  | 0.088214  | -0.13756  | -0.06246  | -0.02801  | 0.185005  | -0.08236  | -0.04032  | 0.05757   | -0.10321  | 0.166467  | -0.01477  | 0.003062  | 0.078897  | -0.0425   | -0.00957  | -0.07632  | -0.06388  | 0.12508   | -0.06719  | -0.0785   | 0.041708 | 0.002633 | -0.00839  |          |
| 24 | intake124 しめじ    | Fresh water cr. | 0.142331  | -0.00319  | -0.07402  | -0.06188  | -0.007762 | -0.01965  | 0.149294  | 0.106395  | -0.07602  | 0.028841  | -0.18665  | 0.028276  | -0.07953  | 0.006219  | -0.098289 | -0.11373  | 0.034964  | -0.06845  | -0.07152  | -0.07692  | -0.1575   | 0.094888  | -0.07863  | -0.07187  | 0.009061  | 0.025063  | 0.013918  | -0.02506  | -0.06388  | -0.02584  | -0.09792  | -0.01811  | -0.15896  | -0.09505 | -0.17239 |           |          |
| 25 | intake125 いか     | Oysters         | -0.0137   | -0.013    | -0.013    | -0.013    | -0.013    | -0.013    | -0.013    | -0.013    | -0.013    | -0.013    | -0.013    | -0.013    | -0.013    | -0.013    | -0.013    | -0.013    | -0.013    | -0.013    | -0.013    | -0.013    | -0.013    | -0.013    | -0.013    | -0.013    | -0.013    | -0.013    | -0.013    | -0.013    | -0.013    | -0.013    | -0.013    | -0.013    | -0.013    | -0.013   |          |           |          |
| 26 | intake126 たらこ    | Shrimps & kabe  | 0.16102   | -0.092547 | 0.0464    | 0.108653  | -0.171423 | -0.11143  | -0.06446  | -0.00400  | 0.014831  | -0.08112  | -0.17399  | 0.131152  | 0.076955  | -0.14583  | 0.109414  | -0.02077  | -0.06637  | 0.091511  | -0.03566  | -0.05745  | 0.177334  | -0.074674 | 0.098781  | 0.15025   | -0.19425  | 0.053423  | -0.06253  | 0.089556  | -0.12556  | 0.091145  | -0.13968  | 0.027157  | -0.1425   | 0.104088 | 0.05723  | -0.05695  |          |
| 27 | intake127 塩かき    | Salted salmon   | 0.228667  | -0.05709  | -0.03235  | -0.03676  | 0.089311  | -0.02537  | 0.055665  | -0.13609  | 0.049298  | -0.06447  | -0.118024 | -0.09204  | -0.0731   | 0.050975  | -0.161929 | 0.02072   | -0.04203  | -0.03465  | -0.0221   | -0.05842  | 0.062459  | -0.08135  | 0.060041  | 0.090808  | -0.05529  |           |           |           |           |           |           |           |           |          |          |           |          |

|          |          |          |          |          |          |           |           |          |           |           |          |          |           |          |           |
|----------|----------|----------|----------|----------|----------|-----------|-----------|----------|-----------|-----------|----------|----------|-----------|----------|-----------|
| Factor37 | Factor38 | Factor39 | Factor40 | Factor41 | Factor42 | Factor43  | Factor44  | Factor45 | Factor46  | Factor47  | Factor48 | Factor49 | Factor50  | Factor51 | Factor52  |
| -0.16216 | 0.200683 | -0.07992 | -0.02844 | 0.122689 | -0.00106 | -0.05296  | -0.0123   | -0.08455 | -0.05603  | 0.069948  | 0.014897 | -0.08205 | -0.19706  | 0.18906  | 0.07373   |
| 0.059242 | -0.12833 | 0.019367 | -0.03964 | -0.02109 | -0.12742 | 0.142814  | 0.017554  | -0.12565 | 0.1324    | 0.119107  | 0.039645 | -0.11749 | 0.047643  | 0.048403 | -0.01314  |
| 0.088173 | 0.076237 | -0.01873 | -0.14321 | -0.05552 | 0.094847 | 0.153184  | -0.11741  | 0.050851 | 0.116019  | -0.04944  | -0.04409 | 0.086655 | 0.081587  | 0.042676 | 0.03613   |
| 0.011793 | 0.046302 | -0.04852 | -0.11112 | 0.078931 | -0.02058 | 0.013178  | 0.000152  | -0.06359 | 0.078048  | -0.10132  | 0.072995 | -0.00615 | -0.00349  | 0.230215 | 0.102049  |
| -0.16576 | 0.17992  | -0.20401 | 0.07914  | 0.068829 | 0.014275 | 0.068959  | -0.13424  | -0.009   | 0.012208  | 0.078463  | 0.017794 | 0.044521 | -0.00651  | 0.030726 | 0.106793  |
| 0.019271 | 0.002684 | 0.122871 | -0.24383 | 0.206254 | -0.12942 | 0.061524  | 0.07406   | 0.145646 | -0.03873  | -0.11255  | -0.04447 | 0.062713 | -0.0057   | -0.03061 | 0.029102  |
| -0.0881  | -0.08785 | -0.13068 | 0.073098 | 0.054477 | 0.046284 | -0.06956  | 0.023669  | 0.092439 | -0.16919  | 0.070684  | 0.021462 | 0.014681 | -0.02871  | -0.12718 | 0.028316  |
| -0.14156 | 0.188655 | -0.00641 | -0.03436 | 0.032077 | 0.369059 | -0.1162   | 0.058577  | -0.0143  | -0.12648  | 0.095077  | -0.1186  | 0.177977 | -0.11041  | 0.20469  | -0.09168  |
| 0.147037 | -0.05438 | -0.02006 | -0.10336 | 0.123484 | 0.013031 | 0.058344  | 0.024865  | -0.15916 | -0.03787  | -0.17265  | 0.14064  | 0.127715 | 0.022755  | -0.037   | 0.038741  |
| -0.11092 | -0.00574 | -0.10268 | 0.004397 | 0.030224 | 0.005987 | 0.150459  | -0.10588  | 0.044089 | 0.090086  | -0.13635  | 0.094327 | 0.145813 | -0.07639  | 0.036568 | -0.06359  |
| 0.051251 | 0.024619 | -0.10068 | 0.052757 | -0.03387 | 0.010557 | -0.01571  | 0.084164  | -0.03298 | -0.02537  | -0.01293  | -0.12485 | 0.007023 | 0.106553  | 0.050811 | -0.044687 |
| -0.00082 | -0.03167 | -0.14614 | 0.080937 | -0.13767 | -0.10882 | 0.060732  | -0.12396  | 0.069144 | 0.044889  | 0.122423  | -0.15689 | 0.069715 | -0.00298  | 0.055004 | 0.067003  |
| 0.013211 | -0.04477 | -0.02328 | 0.123696 | -0.05762 | 0.02258  | -0.01336  | 0.082536  | -0.03853 | -0.0067   | -0.09097  | -0.03021 | 0.076992 | 0.067133  | 0.070396 | -0.04788  |
| 0.018177 | 0.112116 | -0.07241 | 0.27115  | -0.07788 | -0.00181 | -0.07503  | 0.003259  | 0.077144 | 0.014207  | -0.02576  | -0.08195 | -0.0009  | -0.02191  | 0.128513 | -0.02882  |
| -0.14857 | -0.04557 | 0.022587 | -0.10129 | 0.063899 | 0.016799 | 0.028217  | -0.09958  | 0.094714 | 0.006162  | 0.008441  | -0.00667 | 0.025868 | 0.009165  | 0.176984 | -0.2095   |
| -0.02879 | 0.130264 | -0.07351 | 0.01029  | -0.07949 | 0.108203 | 0.089215  | -0.05138  | -0.06825 | 0.138233  | -0.0419   | -0.08052 | 0.030251 | -0.05195  | -0.06809 | 0.067812  |
| 0.125338 | 0.052281 | -0.06593 | -0.0111  | 0.01524  | -0.10422 | 0.042239  | -0.15024  | 0.051651 | -0.15595  | 0.008428  | 0.06411  | 0.008256 | -0.058519 | 0.005559 | 0.06769   |
| -0.07279 | 0.076117 | 0.147576 | -0.03679 | -0.03514 | -0.0377  | -0.02497  | -0.1917   | 0.148408 | 0.020774  | -0.20217  | 0.032823 | 0.053334 | 0.043436  | -0.03226 | -0.02205  |
| 0.07587  | -0.03322 | 0.10885  | -0.03902 | -0.01897 | 0.080268 | -0.0368   | -0.05078  | -0.00159 | -0.04895  | 0.005674  | -0.00992 | 0.109262 | -0.05     | -0.23553 | -0.023    |
| -0.01788 | -0.08179 | 0.044198 | 0.083238 | -0.01978 | -0.12361 | 0.122506  | -0.03954  | 0.166633 | 0.153274  | 0.016784  | -0.05761 | 0.090074 | 0.034788  | -0.05146 | 0.075902  |
| -0.08175 | 0.029113 | 0.142826 | -0.0577  | 0.167273 | 0.012868 | -0.06438  | 0.163159  | -0.06356 | 0.173366  | -0.13363  | 0.094327 | -0.10249 | -0.04451  | -0.06299 | 0.104385  |
| 0.050879 | -0.04484 | -0.1893  | 0.177401 | 0.146042 | 0.05708  | -0.03089  | 0.016232  | 0.01159  | 0.150352  | -0.15048  | 0.149369 | -0.008   | -0.1238   | 0.151681 | -0.07819  |
| 0.16361  | -0.02232 | -0.0696  | 0.163942 | -0.07434 | 0.09855  | 0.004556  | 0.050854  | -0.17224 | 0.028147  | -0.04857  | -0.05361 | -0.12762 | 0.215676  | -0.16036 | -0.07334  |
| 0.336804 | -0.05249 | -0.01446 | -0.14829 | 0.166351 | -0.13668 | 0.094374  | -0.09043  | -0.03895 | 0.034941  | 0.00887   | 0.149599 | -0.0627  | -0.19119  | -0.07206 | -0.13199  |
| 0.078891 | 0.029784 | -0.12326 | 0.064293 | 0.205354 | -0.08557 | -0.01474  | 0.085564  | 0.09805  | 0.00865   | -0.10316  | -0.07084 | 0.054722 | -0.01837  | 0.051007 | -0.20441  |
| -0.07304 | 0.049    | -0.17041 | 0.126003 | -0.10896 | 0.166496 | -0.07515  | -0.17159  | 0.085923 | 0.014393  | -0.00785  | 0.11942  | 0.089214 | 0.058381  | -0.043   | -0.0801   |
| 0.107499 | -0.04378 | -0.05769 | -0.0465  | -0.0568  | 0.231124 | -0.03878  | -0.05142  | -0.08058 | -0.12535  | 0.058225  | -0.09595 | 0.103741 | -0.02924  | -0.06932 | 0.07379   |
| -0.00511 | -0.11858 | 0.09858  | 0.068096 | 0.05164  | 0.17418  | 0.118513  | 0.004528  | 0.012832 | 0.178185  | -0.13667  | -0.10093 | 0.12887  | 0.038614  | 0.025361 | 0.06768   |
| 0.077242 | -0.14073 | 0.145855 | -0.06652 | -0.08128 | -0.02309 | 0.140355  | -0.06123  | -0.04477 | -0.00657  | -0.06814  | 0.004796 | -0.2144  | -0.19257  | 0.057782 | -0.02873  |
| -0.07806 | -0.08422 | 0.199817 | -0.05449 | 0.111497 | 0.026669 | 0.181472  | -0.05081  | -0.04859 | 0.059955  | -0.1163   | -0.00732 | 0.019977 | 0.042176  | 0.298698 | 0.044687  |
| 0.058462 | -0.0269  | 0.117704 | -0.13387 | 0.061311 | -0.0908  | -0.11727  | 0.143369  | 0.067207 | -0.07346  | 0.171897  | -0.02576 | 0.178321 | 0.015233  | 0.111302 | -0.00353  |
| 0.069693 | 0.00248  | 0.074739 | -0.04394 | -0.04067 | 0.103134 | -0.02602  | -0.03259  | 0.115959 | -0.3001   | -0.14256  | -0.03944 | 0.043263 | -0.01367  | 0.07781  | 0.243164  |
| 0.151723 | -0.14479 | 0.17938  | 0.014207 | -0.06024 | -0.00727 | -0.021764 | 0.0270498 | 0.013579 | -0.052328 | 0.0149396 | -0.15539 | 0.030906 | -0.03943  | -0.15725 | 0.01725   |
| 0.04409  | 0.056977 | -0.00547 | -0.05229 | 0.04423  | -0.03207 | 0.076788  | -0.01065  | 0.103538 | 0.013895  | -0.00867  | 0.018983 | -0.04602 | -0.10922  | 0.004669 | 0.050249  |
| -0.02261 | 0.027979 | -0.11626 | 0.100411 | -0.01599 | -0.05553 | 0.049935  | -0.08931  | 0.118961 | 0.036857  | -0.11381  | -0.03056 | 0.111175 | 0.075041  | -0.04479 | 0.03918   |
| 0.173324 | -0.13824 | -0.01521 | 0.100518 | -0.17981 | 0.006477 | 0.277958  | -0.20506  | -0.04114 | 0.082359  | -0.04484  | 0.055195 | -0.11117 | 0.068469  | 0.025492 | -0.00974  |
| -0.03051 | 0.014656 | -0.03927 | -0.07809 | -0.11871 | 0.002232 | -0.07183  | 0.156348  | -0.18267 | 0.037648  | 0.159711  | -0.17238 | 0.034205 | -0.10185  | 0.034923 | -0.00924  |
| 0.080445 | -0.13323 | -0.08696 | -0.14716 | -0.04527 | 0.053528 | 0.038949  | -0.02573  | 0.01383  | -0.0715   | -0.13875  | 0.027774 | 0.199811 | 0.003096  | 0.04549  | 0.001708  |
| 0.060156 | -0.10443 | -0.05955 | 0.015371 | -0.09805 | 0.07445  | -0.06809  | 0.073445  | 0.020104 | 0.041449  | 0.03047   | 0.028794 | 0.116335 | 0.027984  | 0.138392 | 0.013922  |
| -0.02524 | 0.13723  | -0.09448 | -0.03072 | -0.04785 | 0.14958  | -0.0227   | 0.18312   | -0.06258 | -0.07075  | -0.05138  | 0.125814 | -0.03024 | -0.04507  | 0.039805 | -0.23241  |
| -0.02136 | 0.170395 | -0.08377 | -0.01547 | -0.01443 | -0.21835 | 0.071993  | -0.12341  | 0.085249 | -0.08513  | -0.1618   | 0.195645 | -0.10181 | 0.222787  | -0.05011 | -0.06235  |
| -0.20625 | 0.049834 | -0.13187 | 0.078384 | -0.04404 | -0.09805 | 0.060679  | -0.15108  | 0.137374 | -0.09107  | -0.06541  | 0.148007 | -0.08693 | -0.06687  | -0.11232 | 0.065559  |
| -0.01865 | -0.00924 | -0.02465 | 0.029501 | -0.01237 | -0.01138 | 0.026178  | -0.01054  | 0.216281 | -0.0966   | -0.13967  | 0.105607 | -0.03314 | -0.10646  | 0.012376 | 0.010207  |
| -0.1901  | -0.00176 | -0.10571 | -0.10581 | 0.16165  | -0.05922 | -0.03847  | -0.09233  | -0.08307 | -0.06543  | -0.09854  | 0.200302 | -0.01658 | -0.21545  | -0.09185 | 0.01732   |
| -0.07612 | 0.018713 | -0.01392 | -0.01405 | 0.216001 | -0.15138 | -0.10321  | -0.13444  | 0.060484 | -0.07473  | 0.022882  | 0.030811 | 0.137503 | -0.03087  | 0.150131 | 0.017814  |
| 0.04209  | -0.11396 | -0.02385 | 0.056986 | -0.06345 | 0.106134 | -0.23552  | 0.244482  | -0.10372 | 0.009701  | -0.00929  | -0.05696 | 0.070323 | 0.069484  | -0.03638 | 0.015765  |
| 0.024743 | -0.05199 | 0.050241 | -0.09393 | 0.073458 | -0.00129 | 0.043449  | -0.06942  | 0.054556 | 0.045311  | 0.005328  | -0.00853 | -0.1143  | 0.019237  | -0.0387  | 0.215421  |
| 0.121647 | -0.03323 | -0.032   | 0.03696  | -0.04227 | -0.04255 | -0.18769  | -0.02294  | 0.078076 | 0.046831  | -0.04064  | -0.0611  | 0.116677 | 0.018614  | -0.05869 | 0.14753   |
| -0.16472 | 0.019823 | -0.01693 | 0.01709  | 0.029923 | -0.07184 | 0.098537  | 0.02958   | 0.04381  | 0.04381   | 0.5891    | 0.07197  | -0.01646 | 0.061105  | -0.07001 | 0.127017  |
| 0.0245   | 0.031469 | 0.042576 | -0.04643 | -0.03373 | -0.12918 | -0.03497  | 0.018302  | -0.01148 | 0.058718  | -0.14477  | -0.02055 | 0.02007  | 0.150958  | 0.07855  | 0.085817  |
| 0.04293  | -0.05166 | -0.00427 | 0.286703 | -0.11847 | 0.05859  | -0.15904  | 0.157472  | -0.18002 | -0.00267  | -0.0737   | -0.01941 | -0.12951 | 0.115831  | -0.09139 | -0.07961  |
| 0.041269 | -0.09551 | 0.061547 | -0.06017 | 0.041459 | -0.16719 | -0.01639  | -0.02977  | 0.097761 | 0.020097  | 0.099936  | -0.07897 | 0.162813 | -0.05062  | 0.041516 | 0.039429  |
| 0.028859 | -0.02389 | 0.092421 | -0.14559 | -0.02243 | 0.230606 | -0.04647  | -0.21513  | 0.208684 | -0.10501  | -0.01276  | 0.036939 | 0.009122 | -0.22066  | 0.01148  | 0.03244   |
| -0.10123 | -0.03477 | 0.050147 | -0.0408  | 0.004747 | 0.074521 | -0.01697  | 0.121697  | -0.00437 | -0.05988  | 0.098183  | 0.013897 | -0.06879 | -0.01599  | -0.02893 | -0.03835  |
| -0.11941 | 0.174201 | -0.01752 | 0.022696 | -0.01219 | 0.059193 | -0.06244  | 0.011365  | -0.04764 | -0.02146  | 0.068916  | -0.09159 | 0.00856  | 0.103874  | 0.01391  | -0.05628  |
| -0.10799 | 0.152215 | 0.050289 | -0.0686  | -0.12511 | 0.01206  | -0.02929  | 0.10857   | -0.04803 | 0.085237  | -0.08713  | 0.157613 | -0.05591 | -0.11279  | 0.175616 | 0.00725   |
| 0.064738 | -0.00922 | 0.030239 | 0.027389 | -0.00693 | 0.123546 | -0.16981  | 0.057048  | -0.13563 | -0.05262  | 0.185495  | -0.20757 | 0.054679 | -0.12707  | 0.117661 | 0.076051  |
| 0.28281  | -0.21815 | -0.05517 | 0.123101 | -0.07864 | 0.02741  | -0.03106  | 0.054142  | -0.02611 | 0.025745  | -0.09396  | 0.038659 | -0.0827  | -0.06057  | 0.156196 | -0.01839  |
| -0.14014 | 0.139036 | -0.10133 | 0.085325 | -0.08191 | 0.161698 | -0.25619  | 0.090939  | 0.095516 | 0.126577  | 0.079246  | 0.009934 | -0.09123 | 0.097452  | -0.01497 | -0.23692  |
| 0.132524 | -0.06502 | 0.180709 | -0.15079 | 0.142045 | -0.00819 | 0.146246  | -0.12309  | -0.0505  | 0.107501  | -0.04686  | -0.05353 | 0.160112 | 0.12827   | -0.00309 | -0.00309  |
| 0.123945 | -0.06362 | 0.02743  | 0.009366 | 0.230254 | -0.02208 | -0.14068  | 0.01635   | -0.14068 | 0.        |           |          |          |           |          |           |

Scores

| No. | 和名     | 英名             | Factor1  | Factor2  | Factor3  | Factor4  | Factor5  | Factor6  | Factor7  | Factor8  | Factor9  | Factor10 | Factor11 | Factor12 | Factor13 | Factor14 | Factor15 | Factor16 | Factor17 | Factor18 | Factor19 | Factor20 | Factor21 | Factor22 | Factor23 | Factor24 | Factor25 | Factor26 |
|-----|--------|----------------|----------|----------|----------|----------|----------|----------|----------|----------|----------|----------|----------|----------|----------|----------|----------|----------|----------|----------|----------|----------|----------|----------|----------|----------|----------|----------|
|     | 全国     | All Japan      | -0.21522 | 0.067576 | 0.557788 | 0.224447 | 0.277325 | -0.08545 | 0.4391   | 0.312158 | 0.204125 | 0.039316 | -0.19293 | 0.022104 | 0.119996 | -0.12632 | -0.2647  | -0.22183 | -0.25903 | -0.12881 | -0.55772 | -0.29334 | -0.47404 | -0.92379 | -1.26311 | -1.49368 | -1.95052 | -2.41057 |
| 1   | 札幌市    | Sapporo-shi    | 1.139281 | -4.45538 | -4.28687 | 2.669946 | 1.801002 | -5.79428 | -1.4162  | 1.84317  | 2.398201 | -1.42889 | -0.31694 | -0.59875 | 0.313445 | 0.534973 | -0.78533 | -0.42259 | -0.66332 | 2.095069 | -1.69868 | 0.181535 | -0.29791 | 0.769602 | -1.11829 | -0.29486 | 0.822151 | 0.212059 |
| 2   | 青森市    | Aomori-shi     | 11.77852 | 4.553139 | -1.15638 | 3.302017 | 4.79113  | -1.6133  | -0.63788 | -0.38483 | 0.002219 | -0.73743 | -2.37387 | 2.012828 | 0.218425 | -1.45483 | 1.383911 | -0.29001 | -0.4172  | 0.861126 | 0.354462 | -0.34157 | 0.925843 | -0.43662 | 0.538405 | 0.828079 | -0.81499 | 0.143937 |
| 3   | 盛岡市    | Morioka-shi    | 8.492937 | -0.50067 | 0.082021 | -1.58915 | -0.22252 | -2.24511 | -0.37201 | 0.977721 | -1.2778  | -2.30206 | 1.704865 | 0.227949 | 0.153228 | -0.18605 | -1.77766 | 1.775243 | 1.54644  | -0.44094 | -0.70971 | -0.10162 | 0.962183 | 0.077529 | -0.24594 | -0.18644 | 0.769338 | 0.71086  |
| 4   | 仙台市    | Sendai-shi     | 3.046064 | -2.6324  | 0.111263 | -0.4384  | 1.204172 | 1.036077 | 1.586904 | 0.982743 | 1.470605 | -1.17927 | -0.49688 | -4.03611 | 0.495055 | 1.641748 | 0.629352 | -2.00258 | 0.68935  | -1.53768 | -1.3058  | 0.569784 | 0.28866  | 0.284544 | 0.666586 | 0.38484  | -0.17626 | 0.091158 |
| 5   | 秋田市    | Akita-shi      | 7.902669 | -1.88582 | -4.788   | -0.99307 | 2.393973 | 0.872763 | 0.259978 | 0.93379  | -0.01716 | 1.319024 | 2.333927 | -0.31233 | -0.43961 | -0.59603 | 0.789948 | -0.16006 | -0.57517 | -0.94035 | 1.842254 | 0.43785  | -0.40179 | 0.259692 | -0.95929 | 0.992871 | -0.87593 | -0.82673 |
| 6   | 山形市    | Yamagata-shi   | 4.574612 | 2.060652 | 1.401559 | -0.49371 | 3.845457 | 1.187178 | 1.91884  | -0.55242 | 0.017475 | -0.14375 | 0.256725 | -2.28059 | 0.238827 | 0.085855 | -0.27087 | 0.509263 | 0.978235 | 1.066651 | 0.329233 | 0.270489 | -1.10483 | 0.11271  | 1.202264 | -0.79405 | -1.24988 | 0.997812 |
| 7   | 福島市    | Fukushima-shi  | 1.597282 | -1.14213 | -2.49477 | -8.32603 | -2.31598 | -2.84553 | 0.504763 | -3.86665 | -0.98413 | 0.274311 | 1.227914 | -0.48972 | 0.8487   | 0.214124 | -0.07364 | -0.3904  | -0.99288 | 1.007717 | 0.687032 | -2.76358 | -0.05491 | 0.660856 | -0.39708 | 0.368027 | 0.319832 | 0.04267  |
| 8   | 水戸市    | Mito-shi       | 2.238729 | -0.65539 | 0.195511 | -1.98385 | 0.670049 | -0.86514 | 0.422767 | 0.193798 | -0.30424 | -1.35599 | 0.585285 | 4.224742 | -0.17076 | -0.02905 | -0.17662 | 0.715792 | 0.421693 | -2.52543 | -0.41565 | 2.670336 | -1.28445 | 0.510662 | -0.2805  | 0.028166 | 0.880948 | 0.415327 |
| 9   | 宇都宮市   | Utsunomiya-shi | 0.231287 | -1.73347 | 1.301584 | -1.54565 | 1.673901 | 1.436004 | 0.793363 | -0.88821 | -0.21577 | -0.33775 | -0.21459 | 0.503251 | 0.603598 | 0.126347 | -0.96462 | -0.80449 | -0.73566 | 0.148225 | 1.712254 | 2.321188 | 1.395496 | -0.48341 | -0.07389 | -0.59247 | -0.61143 | 0.136502 |
| 10  | 前橋市    | Maebashi-shi   | 1.204069 | -0.35416 | 2.004146 | -4.77262 | -1.07239 | -0.51552 | -0.79324 | 0.384726 | 2.976597 | 0.350149 | -0.93879 | 1.07105  | 0.36719  | -0.81054 | 1.745656 | -0.92169 | 0.089635 | -0.58801 | 0.995514 | 0.367166 | 0.436128 | -1.71057 | 0.60477  | 0.785808 | 0.554794 | -1.17886 |
| 11  | さいたま市  | Saitama-shi    | 1.019656 | -3.7361  | 2.146769 | 0.854452 | 0.372367 | 1.575474 | 0.575265 | 1.490027 | -0.95398 | 0.842935 | -0.44324 | 0.780799 | 2.209468 | -0.03689 | -1.24722 | -0.53672 | 0.61098  | 0.132814 | 0.195471 | -1.41904 | 0.38015  | -1.00528 | -0.67901 | 0.123368 | 0.145261 | -0.35261 |
| 12  | 千葉市    | Chiba-shi      | 1.439755 | -4.88979 | 0.756213 | -0.35199 | -1.64325 | 0.848563 | 0.426088 | 0.402722 | -0.84772 | 0.46105  | -0.59275 | 0.38094  | 0.003363 | 0.785861 | 0.647863 | 0.889808 | 1.102194 | -0.14305 | -1.01125 | -0.16066 | 0.607976 | 0.348034 | -0.07528 | 1.115515 | -1.03515 | -0.11773 |
| 13  | 東京都区部  | Ku-areas of T. | -1.59639 | -5.148   | 1.322762 | -0.49479 | 0.348352 | 0.995087 | 0.238066 | -0.17598 | -1.12879 | 0.597572 | -1.09563 | -1.06901 | -1.32166 | -3.34768 | -3.04463 | -2.11094 | -0.92678 | -0.38518 | -0.38963 | 0.205459 | 0.309296 | 0.802134 | 0.114706 | 1.737978 | 0.135446 | 0.447532 |
| 14  | 横浜市    | Yokohama-shi   | -0.58419 | -4.00406 | 2.173607 | -0.3215  | -0.84421 | 0.284948 | -0.46995 | -0.00542 | -0.34702 | 0.754877 | -0.1969  | 0.579043 | 0.291956 | 0.105996 | 1.476351 | -8.10192 | 1.869129 | 0.733519 | -0.91199 | 0.485705 | -0.56582 | 0.602879 | -6.69417 | -0.39773 | -0.94367 | -0.04442 |
| 15  | 新潟市    | Niigata-shi    | 7.917817 | -1.25267 | -0.46954 | 0.187026 | 0.386833 | 1.997427 | -0.76969 | -1.25678 | -2.12589 | 0.974901 | 1.271928 | -2.65352 | -0.55326 | 0.530135 | 0.324361 | 0.636151 | -0.58212 | 0.53182  | -0.62411 | 0.731568 | 0.633438 | -2.07354 | 0.14887  | -0.40939 | 0.917098 | -0.00289 |
| 16  | 富山市    | Toyama-shi     | 3.960438 | -0.15    | -1.33745 | 1.105769 | -1.28121 | 2.339419 | 0.717907 | -1.35861 | -0.03858 | 1.157102 | -2.07119 | 0.076256 | 0.601044 | 0.704166 | -0.51612 | 0.576355 | -0.00857 | -1.97075 | 0.350681 | -0.71958 | 0.049694 | 0.799531 | 0.076789 | -1.32711 | 2.175092 | -1.18807 |
| 17  | 金沢市    | Kanazawa-shi   | 1.048044 | 1.888656 | 1.115963 | 2.187326 | -0.72022 | -1.35537 | 0.584013 | -3.13194 | -1.14846 | 0.554773 | -2.96419 | -0.8739  | 0.567467 | 0.168036 | 0.289826 | -0.52466 | -0.86146 | -0.19912 | 0.55883  | 1.607151 | -1.25714 | 1.230986 | 0.012725 | -0.96146 | 1.25306  | -0.33131 |
| 18  | 福井市    | Fukui-shi      | -1.92629 | -0.63418 | -2.90616 | -0.95053 | 1.968506 | 1.543281 | 1.737327 | -1.99796 | 2.804947 | -0.31865 | -0.81369 | 0.099826 | 0.296091 | -0.9351  | 0.155691 | 0.69805  | -0.06141 | 1.090525 | -0.0809  | -0.65771 | -1.42104 | -0.35164 | 0.856765 | -0.31508 | 0.945322 | -0.13308 |
| 19  | 甲府市    | Kofu-shi       | -0.48949 | 0.610152 | 3.980406 | -2.37861 | 0.713218 | -0.47177 | -0.00915 | -1.28731 | 0.367818 | -0.13228 | -2.39582 | 0.228033 | -0.13379 | -0.82327 | 0.657262 | 1.525371 | -1.52452 | 0.153034 | -0.16033 | -0.34999 | 0.404474 | 1.125807 | 0.030388 | -0.94988 | -1.42566 | 0.91812  |
| 20  | 長野市    | Nagano-shi     | 5.34839  | 5.725878 | 7.447376 | -0.91352 | -0.19798 | -3.55712 | -0.84936 | 1.004923 | 0.793505 | 1.560735 | 1.943269 | -0.5254  | -1.09726 | -0.62229 | -0.02526 | -1.08539 | 0.671284 | 0.575942 | -0.74064 | -0.91332 | -1.41223 | 0.089072 | -0.2896  | -0.49208 | 1.133599 | -0.11185 |
| 21  | 岐阜市    | Gifu-shi       | -1.66299 | -1.79383 | -0.80308 | -1.45352 | -1.58355 | 0.496763 | 1.017804 | 0.372299 | 0.257295 | 0.209073 | 0.595014 | 0.841938 | 0.793798 | -0.93652 | -0.28054 | 1.265328 | -0.18054 | 0.175219 | -0.8413  | 1.020017 | 0.788085 | -1.06241 | 1.427183 | -1.26225 | 0.143235 | 1.436311 |
| 22  | 静岡市    | Shizuoka-shi   | -0.64243 | -2.77049 | 2.434788 | 1.514658 | 3.074872 | 2.293518 | -0.14819 | -2.59296 | 1.817356 | -0.06522 | -0.03404 | 1.309476 | -0.34925 | 2.555594 | -1.56234 | 0.121105 | 0.158094 | 0.792299 | -0.83344 | -0.98243 | -0.32237 | -0.61501 | -0.12361 | 0.626777 | 0.494627 | 0.054162 |
| 23  | 名古屋市   | Nagoya-shi     | -1.61112 | -1.96561 | 1.141338 | 0.733091 | -1.75372 | -0.24805 | 1.406499 | 1.182143 | -0.21116 | -0.20975 | -0.08176 | 0.145808 | -0.57533 | -0.7696  | -2.11915 | 0.844539 | -1.8702  | 1.613512 | 0.805874 | 0.769073 | -0.70945 | -1.39699 | -0.79067 | -1.27427 | -0.42656 | -0.23788 |
| 24  | 津市     | Tsu-shi        | -0.86304 | -0.44431 | -1.56285 | -1.23274 | 0.712049 | 2.968642 | 0.211581 | 0.069372 | -0.39573 | -2.94406 | 0.604798 | 0.304667 | -1.34152 | 1.086844 | 0.294783 | 0.26054  | -1.29833 | -0.45073 | -0.57482 | -0.2465  | -0.9903  | 1.829963 | 0.508414 | -0.31436 | -0.37123 | -0.70401 |
| 25  | 天津市    | Otsu-shi       | 1.312312 | -1.13267 | 0.571817 | 2.524966 | -3.85037 | -0.81268 | -1.19058 | 1.206434 | 2.789298 | 0.687911 | 1.393427 | -0.53788 | -1.92907 | -0.88548 | 0.416488 | -0.36843 | 0.103959 | -1.64398 | 1.538149 | 0.255829 | 0.378025 | 0.791219 | 0.180333 | -0.53698 | -0.20694 | -0.01213 |
| 26  | 京都市    | Kyoto-shi      | -0.66172 | -2.47897 | 0.423296 | 3.303016 | -1.27012 | -0.61988 | -2.61747 | -2.71109 | -1.06167 | 0.372879 | 2.683624 | 1.653283 | 1.271902 | -1.4321  | 0.460791 | -1.39193 | -0.00976 | -0.49171 | -0.54312 | -0.80292 | -0.37441 | 0.960324 | 2.059207 | 0.00042  | -1.06826 | -0.27837 |
| 27  | 大阪市    | Osaka-shi      | -1.46551 | -0.80385 | -0.74039 | 3.220275 | -1.39284 | -0.66144 | 1.344632 | 0.586117 | 1.45701  | -0.42505 | -1.11271 | -0.49435 | -0.60129 | -0.60625 | -0.02252 | 0.534846 | -0.36571 | -1.53061 | 0.464817 | -1.2918  | -0.1175  | -0.83223 | 0.194313 | 0.862596 | 0.317797 | -0.1611  |
| 28  | 神戸市    | Kobe-shi       | -4.75009 | -1.66798 | 0.392602 | 2.255145 | -0.03126 | -1.07283 | 1.851382 | -1.73234 | -0.28753 | 0.310543 | 0.038295 | -0.22921 | 0.882798 | -0.35045 | 2.595847 | 0.793711 | 0.075337 | -0.67402 | -0.85602 | 0.204741 | 0.530302 | -0.67978 | -0.82257 | 0.936181 | 1.299967 | -0.19116 |
| 29  | 奈良市    | Nara-shi       | -0.2435  | -1.87224 | -0.17272 | 1.822631 | -2.32065 | 1.632589 | 0.419337 | -0.5529  | -0.28571 | -1.24601 | 0.685085 | 0.807625 | 0.56779  | -0.00364 | 1.807103 | -0.33934 | 0.348872 | -0.4747  | -0.93837 | -0.65538 | 0.169843 | -0.6178  | -0.74255 | -1.48979 | -0.96995 | 0.795024 |
| 30  | 和歌山市   | Wakayama-shi   | -2.02539 | 2.590756 | 0.420902 | 1.132195 | 0.050572 | 0.77328  | 0.238605 | -1.21248 | 0.141697 | -3.06208 | 0.44971  | -0.38579 | -1.59561 | -0.46631 | 1.639234 | -0.56092 | -0.83786 | 1.010624 | 0.697664 | -0.54613 | 1.817526 | 0.403871 | -0.77318 | 0.042572 | 0.243942 | -0.33937 |
| 31  | 鳥取市    | Tottori-shi    | 2.426533 | 4.218069 | -3.03006 | 1.358074 | -4.38481 | -0.743   | 1.860275 | -1.53821 | -1.50472 | 3.038094 | 0.039342 | 1.608661 | -1.82928 | 1.813409 | -0.72144 | -0.50233 | 0.017017 | 1.497206 | -1.79675 | 1.157314 | 1.117272 | -0.28185 | 0.717238 | 0.077339 | -0.3456  | -0.353   |
| 32  | 岡山市    | Matsue-shi     | 0.935976 | -0.04564 | -2.51021 | -0.92987 | -1.06482 | 1.272815 | 2.800636 | 3.157262 | -0.72957 | 0.382204 | -2.22089 | 1.922243 | -0.76131 | -0.12697 | 0.671158 | -1.20249 | 0.932212 | 1.277134 | -0.52648 | -1.75277 | -0.70927 | 0.359781 | -0.3166  | -0.32852 | -0.13649 | 0.813595 |
| 33  | 岡山県山口市 | Okayama-shi    | -2.40785 | 3.445923 | 3.090635 | 1.19459  | 1.487862 | 1.189758 | 5.079513 | 0.906288 | 0.067943 | 0.542086 | 2.393433 | 0.530257 | 0.556151 | 0.05191  | 0.619998 | 0.8733   | -0.84894 | 0.007866 | 0.033173 | -0.32088 | 0.308263 | 1.015664 | -1.24554 | 1.153783 | 0.433382 | 0.277472 |
| 34  | 広島市    | Hiroshima-shi  | -1.08107 | 2.288734 | 0.095228 | 1.30425  | -2.55228 | 0.088621 | 1.458305 | -1.1891  | -1.71477 | -1.29382 | -0.0464  | -0.73612 | 0.971615 | 0.143753 | -0.26739 | -        |          |          |          |          |          |          |          |          |          |          |

| Factor27 | Factor28 | Factor29 | Factor30 | Factor31 | Factor32 | Factor33 | Factor34 | Factor35 | Factor36 | Factor37 | Factor38  | Factor39 | Factor40 | Factor41 | Factor42 | Factor43 | Factor44 | Factor45 | Factor46 | Factor47 | Factor48 | Factor49 | Factor50 | Factor51 | Factor52 |          |
|----------|----------|----------|----------|----------|----------|----------|----------|----------|----------|----------|-----------|----------|----------|----------|----------|----------|----------|----------|----------|----------|----------|----------|----------|----------|----------|----------|
| -2.70126 | -2.03124 | -1.66738 | -1.14793 | -0.89292 | -0.48187 | -0.23725 | -0.12044 | -0.1042  | 0.090719 | 0.017776 | -0.08374  | 0.098949 | -0.03604 | -0.03424 | -0.14207 | 0.056188 | -0.01134 | 0.069563 | 0.103429 | 0.125362 | -0.23996 | -0.07823 | -0.14087 | 0.153703 | 0.172883 |          |
| 0.102137 | 0.839639 | 0.409486 | -2.07944 | 1.288996 | -0.04076 | -0.4679  | 0.26846  | -0.39058 | -0.02133 | -0.09966 | 0.650549  | -0.18961 | 0.780353 | 0.198054 | 0.088035 | -0.23531 | 0.106305 | -0.04953 | 0.572793 | 0.302723 | -0.35271 | -0.0389  | 0.030273 | -0.13468 | 0.050886 |          |
| -0.41899 | 0.645067 | -0.66937 | 1.132956 | -1.03697 | 0.191478 | -0.98604 | 0.489425 | 0.569207 | -0.53436 | -0.239   | 0.181272  | -0.89689 | 0.775877 | -0.91601 | 0.398054 | -0.24417 | -0.74876 | 0.246727 | -0.3056  | -0.10198 | 0.401646 | 0.071554 | 0.309014 | -0.04094 | -0.49875 |          |
| -0.57696 | -0.96828 | -0.54148 | 1.561553 | -0.41311 | -0.78072 | 1.131873 | 0.557515 | -0.22143 | 0.162364 | -1.56757 | 1.430904  | 0.529196 | -0.56886 | 0.404347 | -0.47439 | 0.708718 | 0.608081 | -0.27145 | 0.873045 | -0.08376 | -0.57626 | 0.434794 | -0.57867 | -0.57361 | 0.096796 |          |
| -0.33553 | -0.7661  | 1.7127   | 0.612902 | -1.49985 | 0.103494 | 0.103129 | -0.82162 | -0.26191 | 0.02678  | 0.26583  | -0.78284  | -0.54529 | 0.260851 | -1.61145 | -0.03666 | -0.62693 | 0.901156 | -1.28574 | 0.447998 | 0.071442 | 0.566519 | 0.001621 | 0.013283 | 0.129439 | -0.60068 |          |
| 0.828155 | 1.273132 | 0.069893 | -0.20693 | -0.83261 | 0.35733  | 0.56214  | -1.13297 | -0.43171 | 0.913147 | 0.565611 | -1.06132  | 0.727783 | -0.55634 | 1.780235 | -0.53054 | 0.95107  | 0.037102 | -0.62983 | 0.436521 | 0.087547 | -0.01925 | 0.302294 | 0.816204 | -0.23276 | 0.167992 |          |
| -0.56078 | 0.430072 | 0.858903 | -0.17411 | 0.874249 | 1.193429 | 1.344413 | 0.405079 | -0.48317 | 1.418495 | -0.58734 | 0.399851  | -0.22945 | -0.87398 | 0.600905 | 0.026739 | -0.66491 | -0.43562 | 0.908924 | -1.01198 | -0.00833 | 0.007308 | 0.214821 | -0.49126 | 0.242009 | 1.861764 |          |
| -0.88844 | 0.114985 | 0.561526 | 0.162833 | -0.0108  | 0.4132   | 0.033254 | 0.452742 | -0.08138 | -0.33994 | 0.016716 | 0.012976  | -0.54756 | 0.00897  | -0.95794 | 0.515577 | 0.094909 | -0.39631 | 0.259956 | -0.82083 | 0.624494 | 0.087544 | 0.59741  | 0.199555 | 0.34     | -0.16861 | -0.33035 |
| -0.26639 | -0.43359 | 0.422153 | -0.82793 | 0.298047 | 0.073257 | 0.350215 | -0.11839 | -0.23737 | -0.13605 | 1.269096 | -1.99912  | -0.46666 | -0.07507 | -1.12388 | 0.433038 | -0.294   | -0.67827 | 0.113562 | -0.33299 | 0.757301 | 0.214251 | -0.03484 | -0.61944 | 0.910522 | 0.296214 |          |
| 0.557609 | -0.2356  | 0.384487 | -0.95177 | 0.497591 | -0.82684 | 0.179027 | -0.65856 | -0.19686 | -0.6537  | -0.70183 | 2.005404  | 0.865998 | 1.010205 | 0.450877 | 1.250981 | 0.862188 | 0.634537 | -0.22589 | -0.38899 | 0.558837 | 1.42163  | -1.7755  | -0.44305 | 0.106154 | -0.45595 |          |
| 0.427424 | 0.869288 | 0.178686 | -0.55995 | 0.820163 | -0.02776 | 0.998184 | 0.044065 | 0.336261 | 0.131079 | 0.684582 | 1.344622  | -0.67491 | 0.427427 | -0.86273 | -0.74222 | -0.16423 | 1.183681 | 0.544898 | 0.977465 | -0.65212 | -0.84357 | 0.425547 | -0.6201  | -0.49666 | 1.005758 |          |
| 0.430556 | 0.81373  | 0.734328 | 0.27998  | -0.13001 | 0.375166 | 0.783661 | 0.045216 | -1.98733 | 0.044616 | -0.12843 | -1.05254  | -0.00134 | -0.43221 | 0.403292 | 1.805837 | -0.76872 | -0.35631 | 0.567573 | 0.078162 | -0.72267 | -1.5915  | -0.11329 | -0.28819 | 0.197097 | -1.07888 |          |
| 0.766661 | -0.29462 | -1.10726 | 0.033921 | 0.588442 | -0.63848 | -1.41735 | -0.09327 | -0.99866 | -2.23659 | -0.4244  | -0.07364  | -0.16968 | -0.3319  | 0.68264  | 0.013454 | -1.27064 | 1.032781 | 1.449245 | 0.575272 | 0.410749 | 1.309665 | 1.051694 | 1.217055 | 0.533417 | 1.054605 |          |
| 0.352298 | -0.61173 | -0.88781 | -0.9756  | -1.37756 | -0.51976 | -0.0651  | 1.367424 | 0.813226 | 0.422838 | 0.28146  | -0.16428  | 0.088021 | 0.128805 | -0.23946 | 0.11638  | 0.158624 | -0.68118 | 0.050195 | 0.000172 | -0.59367 | -0.05188 | 0.623591 | -0.22308 | -0.08429 | 0.718471 |          |
| -0.26887 | 0.793863 | 0.510526 | 1.66418  | 1.106972 | 0.349568 | 0.058737 | 1.040759 | 1.248051 | 1.964223 | 0.812073 | 0.941784  | 1.986217 | 0.577805 | -0.78093 | 0.304309 | 0.32204  | -1.56346 | -0.10516 | 1.226892 | 0.202827 | 0.333365 | -0.19482 | 0.71119  | 0.278415 | 0.026407 |          |
| 0.711059 | -1.53619 | -0.55716 | -0.54618 | 2.31006  | 0.068912 | -1.11291 | 0.313014 | 1.734669 | -0.85198 | 1.024626 | -0.64596  | -0.02536 | -0.43724 | -0.33656 | -0.05947 | -0.02065 | -0.52421 | 0.149131 | -0.0064  | 0.248976 | -0.90541 | -0.20441 | -0.03256 | 0.243613 | -0.68042 |          |
| -0.07016 | 1.040353 | 0.315628 | -0.55053 | -0.13654 | -0.02486 | -2.44885 | 0.207111 | 0.077466 | 1.139396 | -0.39466 | 0.505104  | 0.543153 | -0.2615  | 0.703677 | -0.61498 | -1.18368 | -0.92078 | -0.1259  | 0.009016 | -0.48752 | 1.177212 | 0.04611  | -0.98026 | -0.70047 | -0.00107 |          |
| 0.036356 | -0.02274 | 0.052891 | 0.333683 | -0.57501 | 0.318096 | 0.636361 | -0.46402 | -0.36619 | -1.16175 | -0.24543 | 0.1117648 | 0.731757 | -1.08638 | -0.72125 | 0.390842 | 1.048806 | 0.761537 | 0.293689 | 0.436882 | 0.344453 | -1.29101 | -0.07994 | 1.31929  | -0.66792 | 0.910519 |          |
| 0.765388 | -1.26603 | -0.15089 | 0.876134 | -0.25851 | -2.95428 | 1.113498 | -0.51938 | 0.319228 | 0.854247 | -1.1069  | -0.6862   | 0.634713 | 0.775327 | 0.3603   | -0.28578 | -0.21178 | -0.29814 | 0.681376 | 0.142714 | 0.041579 | -0.28041 | -0.01903 | 0.3854   | 1.443024 | -0.4409  |          |
| 0.383094 | -0.23241 | -0.76408 | -0.54174 | 1.558841 | -0.20562 | 0.108027 | -0.70134 | -0.31945 | 0.018589 | 0.180551 | -0.95869  | 0.103681 | -0.00937 | 0.778509 | -0.18521 | -0.64836 | -0.13859 | -1.89379 | 0.805886 | -0.09806 | -0.04051 | 1.586684 | -0.26053 | -0.8134  | -1.08248 |          |
| 0.950334 | -0.26153 | -0.56839 | -0.27512 | -0.8219  | 0.074579 | -0.8243  | 0.169488 | -0.73789 | 0.485979 | 0.399317 | -0.23165  | 0.313027 | 0.547359 | 0.92449  | -0.04588 | 0.018672 | 1.028367 | 0.126658 | -0.4104  | 0.122724 | 0.682019 | -0.76584 | 0.296929 | 0.47684  | -0.6952  |          |
| -1.02513 | -0.33946 | 0.584673 | -0.12145 | -1.22311 | 1.24782  | -2.22322 | 0.541081 | -0.936   | -0.09664 | 1.136973 | 0.082636  | 0.459658 | -0.09003 | 0.802931 | -0.30975 | 0.970322 | -0.11342 | 0.173626 | -0.00644 | -0.97065 | -0.06199 | 0.05571  | 1.382342 | 0.044995 | -0.23779 |          |
| -0.83315 | 1.146544 | 0.190409 | 0.22294  | -0.39236 | -0.65176 | 1.341938 | -0.3542  | 1.23002  | -0.60025 | 0.925726 | -0.08558  | -0.31739 | -1.94066 | 0.552418 | 0.15036  | 0.899748 | 0.496825 | -0.30886 | -0.53081 | -0.45137 | 0.853033 | 0.460617 | 0.112005 | -0.18568 | 0.058367 |          |
| 0.72327  | 0.914532 | 0.937648 | 1.965966 | -0.35791 | 0.461418 | -0.05126 | 0.200089 | 0.345124 | 0.921095 | -0.57941 | -0.45112  | -1.8767  | -1.19436 | -0.62921 | -0.56338 | -0.46273 | 0.359979 | -0.1301  | 1.049836 | 0.955768 | 0.675089 | -0.51692 | -0.05031 | -0.01754 | 0.264413 |          |
| 0.722608 | -0.18525 | -1.90842 | 0.855539 | 0.564616 | 1.010113 | -0.71039 | 0.153286 | -0.01506 | 1.429232 | 0.703552 | 1.273055  | -1.01462 | 0.137311 | 0.055747 | 1.127761 | 0.01075  | 1.187382 | 0.559766 | -0.0325  | -1.1677  | -0.52119 | -0.72792 | 0.124006 | 0.050109 | -0.49463 |          |
| -0.49257 | -0.34832 | 0.788461 | 0.127045 | 0.815453 | -1.00047 | 1.073119 | -0.45555 | -0.19466 | -0.65107 | -0.40906 | 1.421014  | -0.89835 | -1.42597 | -0.2597  | 0.547685 | -0.89031 | -1.70263 | 0.244081 | -0.97119 | -0.05892 | -0.26748 | 0.005337 | 0.99558  | -0.18547 | -0.70042 |          |
| -1.2844  | -0.51682 | 1.216569 | -0.42605 | 0.830259 | 0.232303 | -0.63233 | -0.30983 | 0.536933 | -0.08133 | -1.35508 | -1.07277  | -0.59349 | 0.054564 | 0.479089 | -0.60898 | 0.21241  | 0.643549 | -0.00696 | 0.921351 | -0.03731 | -0.12833 | -1.32259 | -0.43762 | -0.3126  | -0.0882  |          |
| -0.74291 | -0.80066 | 0.580459 | 1.416021 | 1.68047  | 0.457069 | 0.560435 | 1.083198 | 0.186876 | 0.408402 | 0.719463 | -1.32015  | 0.648962 | 1.693163 | 1.249664 | 0.92484  | 0.354077 | 1.322447 | -0.00307 | -1.07798 | 1.011768 | 0.329823 | -0.02708 | -0.11797 | -1.3019  | 0.623325 |          |
| 0.487161 | -0.99624 | -1.30374 | -0.58653 | -0.53499 | 1.860573 | 2.395796 | 0.873884 | 0.020828 | 0.561942 | -0.94787 | 0.66818   | -1.38056 | -0.47043 | 0.860291 | -0.058   | 0.316312 | -0.72363 | -0.93552 | -0.0279  | -0.27451 | 0.816125 | -0.60068 | 0.356223 | 0.769139 | -0.00709 |          |
| 1.655682 | 0.916544 | -0.48249 | -1.16879 | -1.42689 | -1.18119 | -0.17859 | 0.731589 | 0.283486 | 1.150775 | -0.24063 | -0.00227  | 0.217549 | -0.28287 | -1.27299 | -0.44897 | 0.425821 | 0.804995 | 0.161297 | -1.98779 | 0.68566  | -0.44805 | 0.722199 | 0.011053 | -1.0973  | -0.12615 |          |
| -0.25172 | 0.412769 | 1.200198 | 0.065757 | 0.523032 | -0.26526 | -0.03801 | 1.468419 | -1.65775 | -0.72325 | 0.15144  | -1.32131  | 1.514347 | -1.55659 | -0.48604 | -0.6701  | 0.164646 | 0.21348  | 0.293565 | 0.344836 | -0.60944 | 0.230408 | -0.62217 | -0.73077 | 1.037562 | 0.187132 |          |
| -0.07626 | 0.148053 | 0.908931 | -0.14547 | -0.03604 | -0.67735 | 1.393622 | -0.05429 | -0.91236 | 1.34436  | -0.04375 | -0.02546  | -0.35496 | 0.901067 | -0.11457 | 0.534272 | 0.21083  | 0.459559 | -0.48998 | 0.133347 | -0.64889 | 0.020223 | 0.930413 | -0.22142 | 0.245551 | 0.199003 |          |
| 0.369924 | -1.80345 | 1.252255 | -0.12211 | -0.40627 | 0.790512 | 0.888607 | -0.85704 | 1.014292 | -1.82997 | 0.884105 | 0.792077  | 0.055064 | -1.11021 | 0.936555 | -0.68314 | 0.306343 | -0.13451 | 0.407883 | 0.074901 | -0.04733 | 0.068408 | -0.9742  | -0.85611 | -0.54034 | -0.37683 |          |
| -0.91576 | 0.701304 | 1.612616 | -0.51713 | 0.157872 | -0.8669  | -1.63442 | -0.36945 | 2.321617 | -0.38759 | -0.55539 | 0.499496  | -0.31581 | 0.32584  | 0.098689 | 0.45834  | -0.04299 | 0.712998 | -0.15819 | 0.222861 | -0.33602 | -0.72252 | 0.790757 | 0.220228 | 0.298538 | 0.2079   |          |
| -1.08704 | 1.632891 | -1.11828 | 0.456463 | 0.754509 | -1.31817 | -0.0321  | -0.42831 | -1.25004 | -0.09374 | 1.205006 | 1.27529   | -0.03378 | 0.03898  | 0.849303 | -1.33145 | -0.62384 | -0.4668  | -0.02073 | -0.27751 | 0.153077 | -0.19185 | -0.80371 | -0.15536 | -0.11551 | -0.72859 |          |
| 0.14514  | 0.043753 | -2.17666 | 0.257659 | 0.895623 | 0.873099 | 0.587152 | 0.782192 | 1.272999 | -0.35158 | -1.28594 | -1.36019  | 1.085969 | -1.04381 | -1.13269 | -0.28    | 0.04185  | 0.66633  | 0.709674 | -0.30499 | -1.08795 | 0.617969 | -0.00094 | -0.42734 | 0.098151 | -0.78283 |          |
| 1.050722 | -0.45867 | 0.767897 | 0.773944 | 0.549987 | 1.07571  | -0.62832 | -0.33991 | 0.250048 | -1.53868 | -0.22096 | 0.15561   | 0.535445 | 0.475204 | 0.121344 | -0.48567 | -0.92917 | -0.33641 | -1.30667 | -1.57164 | -0.97472 | -0.01573 | 1.007242 | 0.562116 | -0.57958 | 0.045592 |          |
| 0.344723 | 0.101563 | -1.22952 | -1.32243 | 0.571043 | -0.0     |          |          |          |          |          |           |          |          |          |          |          |          |          |          |          |          |          |          |          |          |          |



|         |          |          |          |          |           |          |          |          |          |          |          |          |          |          |          |          |          |          |          |          |          |          |          |          |          |          |          |          |          |          |          |          |          |          |          |          |          |          |          |          |          |
|---------|----------|----------|----------|----------|-----------|----------|----------|----------|----------|----------|----------|----------|----------|----------|----------|----------|----------|----------|----------|----------|----------|----------|----------|----------|----------|----------|----------|----------|----------|----------|----------|----------|----------|----------|----------|----------|----------|----------|----------|----------|----------|
| intake1 | 5.715504 | -3.20424 | -18.8843 | -17.6791 | -17.0153  | -19.2274 | -21.7105 | -20.2843 | -13.9261 | -13.2695 | -13.4058 | -12.8486 | -12.2878 | -11.5542 | -11.5026 | -10.9664 | -10.8312 | -10.2982 | -10.1334 | -10.1636 | -10.1159 | -10.2242 | -10.3345 | -10.4453 | -10.5225 | -10.7566 | -11.193  | -11.3364 | -11.4385 | -11.4879 | -11.4184 | -11.1101 | -11.4933 | -11.4116 | -11.4918 | -11.4924 | -11.4918 | -11.4918 |          |          |          |
| intake2 | 1.149201 | 1.005949 | 3.90501  | 44.7441  | 44.933605 | 45.5006  | 53.21314 | 54.84365 | 55.8009  | 56.26688 | 55.58014 | 55.17183 | 52.87606 | 50.93767 | 48.39326 | 47.40616 | 47.02331 | 47.2862  | 47.24443 | 47.30945 | 47.40334 | 47.40899 | 47.38383 | 47.373   | 47.34684 | 47.34681 | 47.29941 | 47.2519  | 47.23171 | 47.21333 | 47.21333 | 47.19553 | 47.18288 | 47.17897 | 47.1825  | 47.18339 | 47.18324 | 47.18301 | 47.18222 | 47.18222 | 47.18222 |
| intake3 | 9.040226 | 27.20129 | 52.24545 | 61.76558 | 59.92473  | 62.40604 | 63.64622 | 70.68944 | 74.33092 | 74.4034  | 76.28197 | 75.98505 | 80.71749 | 83.87616 | 84.39266 | 84.76263 | 82.02151 | 82.3927  | 82.94931 | 82.76402 | 82.80333 | 82.87898 | 83.02274 | 83.13974 | 83.24513 | 83.17487 | 83.82161 | 84.01146 | 84.11023 | 84.15538 | 84.24866 | 84.25245 | 84.28205 | 84.25791 | 84.25752 | 84.25752 | 84.25752 | 84.25752 | 84.25752 | 84.25752 | 84.25752 |
| intake4 | 27.54922 | 43.33575 | 64.71369 | 67.90257 | 70.73744  | 73.927   | 77.1913  | 77.31749 | 74.68017 | 73.49368 | 74.90147 | 73.62824 | 71.82556 | 70.77298 | 69.47924 | 68.9657  | 68.72404 | 68.56848 | 68.36442 | 68.18917 | 67.15946 | 66.18238 | 66.18755 | 66.08501 | 66.08046 | 67.64866 | 67.61899 | 67.47096 | 67.36996 | 67.23849 | 67.18956 | 67.16057 | 67.14723 | 67.14332 | 67.1458  | 67.14518 | 67.14526 | 67.14526 | 67.14526 | 67.14526 |          |
| intake5 | 11.71342 | 17.444   | 8.31279  | 12.8573  | -4.2907   | -16.5082 | -17.1088 | -18.8823 | -20.0685 | -20.3753 | -19.9747 | -18.5178 | -18.25   | -18.35   | -18.45   | -18.475  | -18.475  | -18.475  | -18.475  | -18.475  | -18.475  | -18.475  | -18.475  | -18.475  | -18.475  | -18.475  | -18.475  | -18.475  | -18.475  | -18.475  | -18.475  | -18.475  | -18.475  | -18.475  | -18.475  | -18.475  | -18.475  | -18.475  | -18.475  | -18.475  |          |
| intake6 | 7.652349 | 30.70168 | 64.31241 | 66.1586  | 58.06828  | 50.50045 | 27.66735 | 24.54753 | 21.91814 | 19.74282 | 18.70389 | 17.65601 | 17.19133 | 17.45443 | 17.77293 | 17.90025 | 17.2107  | 17.42052 | 17.40438 | 17.60488 | 17.48217 | 17.65518 | 17.51506 | 17.58225 | 17.23062 | 17.10093 | 17.70977 | 17.0237  | 17.06682 | 17.04343 | 17.05001 | 17.04619 | 17.04459 | 17.03535 | 17.03121 | 17.0322  | 17.03104 | 17.03012 | 17.02974 | 17.02974 | 17.02974 |
| intake7 | -3.17147 | -13.2083 | -0.31519 | 5.23642  | 5.440613  | 10.25475 | 13.35473 | 14.99513 | 16.01974 | 14.74282 | 11.83379 | 10.65587 | 9.70580  | 8.97589  | 7.50383  | 5.77789  | 4.51299  | 6.5009   | 4.71041  | 4.73628  | 4.76802  | 4.69851  | 4.63914  | 4.57942  | 4.52969  | 4.51264  | 4.329045 | 4.02862  | 3.70765  | 3.77672  | 3.637428 | 3.561183 | 3.544018 | 3.545882 | 3.508812 | 3.502235 | 3.501636 | 3.502379 | 3.502542 | 3.502542 |          |
| intake8 | 3.298761 | -5.6027  | 13.88557 | 16.09672 | 26.29015  | 24.18665 | 25.60225 | 22.75111 | 22.92521 | 22.48029 | 21.3656  | 22.41058 | 21.70041 | 26.90717 | 26.93754 | 27.56665 | 27.6169  | 27.63141 | 27.7945  | 27.77173 | 27.81953 | 27.79221 | 27.71113 | 27.58249 | 27.36691 | 27.02126 | 26.30156 | 26.44416 | 26.34779 | 26.29274 | 26.2689  | 26.25587 | 26.25698 | 26.24961 | 26.24905 | 26.25001 | 26.25216 | 26.25216 | 26.25216 |          |          |

[illegible]

## Loading weights

|           | Factor1  | Factor2  | Factor3  | Factor4  | Factor5  | Factor6   | Factor7  | Factor8  | Factor9  | Factor10 | Factor11 | Factor12 | Factor13 | Factor14 | Factor15 | Factor16 | Factor17  | Factor18  | Factor19 | Factor20 | Factor21 | Factor22 | Factor23 | Factor24 | Factor25 | Factor26 | Factor27 | Factor28 | Factor29 | Factor30 | Factor31 | Factor32 | Factor33 | Factor34 | Factor35 | Factor36 | Factor37  | Factor38 | Factor39 |          |
|-----------|----------|----------|----------|----------|----------|-----------|----------|----------|----------|----------|----------|----------|----------|----------|----------|----------|-----------|-----------|----------|----------|----------|----------|----------|----------|----------|----------|----------|----------|----------|----------|----------|----------|----------|----------|----------|----------|-----------|----------|----------|----------|
| intake11  | 0.037484 | 0.09134  | -0.07634 | 0.05775  | 0.05753  | -0.05987  | -0.03694 | 0.08594  | 0.04926  | -0.10837 | -0.04541 | 0.08049e | -0.00338 | 0.06680e | -0.10447 | 0.10206e | 0.0117709 | -0.00805  | -0.11212 | 0.09026  | -0.29142 | 0.05682  | 0.04408e | 0.12083  | 0.05683  | 0.16744  | 0.095834 | -0.03917 | 0.078718 | 0.043123 | -0.03261 | 0.149318 | 0.117834 | -0.05507 | 0.05793  | -0.0583  | 0.17522e  | 0.06695  |          |          |
| intake12  | 0.007537 | 0.020072 | 0.112675 | 0.07573  | -0.19091 | -0.10592  | 0.106281 | -0.05987 | -0.00676 | 0.004168 | -0.07454 | -0.02057 | -0.17043 | -0.1744  | -0.0971  | 0.040829 | 0.031256  | 0.104187  | 0.059106 | -0.03152 | 0.082448 | -0.08127 | -0.05267 | -0.12118 | 0.06029  | -0.05685 | -0.05366 | -0.05444 | -0.11828 | -0.00909 | -0.05258 | -0.04093 | -0.10186 | 0.115478 | -0.02086 | -0.03119 | -0.1835   | -0.1314  | -0.00748 |          |
| intake13  | 0.059289 | 0.120608 | 0.105162 | 0.061432 | -0.16111 | 0.083044  | 0.170865 | -0.05185 | 0.086769 | -0.07952 | 0.04186  | 0.04985  | 0.090384 | -0.04349 | -0.07783 | 0.076435 | 0.123031  | 0.048513  | 0.147519 | -0.07328 | -0.00071 | 0.12533  | 0.11201  | -0.06859 | -0.05329 | 0.026604 | 0.21328  | 0.032888 | -0.02549 | 0.002699 | 0.166799 | -0.01676 | 0.046887 | -0.1072  | 0.039327 | 0.051806 | 0.114254  | 0.040477 | -0.08555 |          |
| intake14  | 0.180677 | 0.05115  | 0.085693 | -0.0347  | 0.00347  | 0.092238  | 0.070654 | -0.06991 | -0.12152 | -0.01181 | 0.184667 | -0.24416 | -0.04073 | -0.03142 | -0.37875 | 0.18712  | -0.0315   | -0.044111 | -0.0892  | -0.13716 | -0.09052 | 0.07689  | -0.18201 | -0.09986 | 0.030591 | -0.03048 | -0.02347 | -0.10631 | -0.02795 | -0.15821 | 0.011244 | -0.06782 | -0.12343 | 0.036231 | 0.146892 | -0.10415 | -0.02687  | -0.03119 | -0.08254 |          |
| intake15  | 0.068875 | 0.166672 | 0.111185 | 0.017286 | -0.03373 | -0.05258  | 0.050204 | 0.119616 | -0.0491  | 0.109402 | -0.03483 | -0.0874  | -0.08572 | -0.0441  | -0.29515 | -0.00378 | -0.06207  | 0.77277   | -0.19133 | 0.023443 | -0.08787 | 0.16434  | 0.05678  | 0.007089 | -0.06521 | -0.02785 | 0.059194 | 0.018094 | 0.031798 | #####    | -0.10344 | -0.101   | -0.00828 | 0.034455 | -0.09167 | 0.038324 | -0.09244  | 0.12391  | -0.14899 |          |
| intake16  | 0.076821 | -0.15101 | 0.092717 | -0.08903 | -0.01761 | -0.0405   | 0.080022 | 0.010496 | -0.03218 | 0.071467 | -0.04594 | 0.039032 | -0.03508 | 0.00909  | -0.16441 | -0.07344 | 0.01532   | 0.029412  | -0.0178  | -0.0259  | -0.07137 | -0.0368  | -0.14689 | -0.1395  | -0.07688 | -0.1739  | 0.059261 | 0.019849 | 0.00948  | -0.01732 | 0.044008 | 0.02205  | -0.1873  | -0.07008 | -0.03531 | 0.02356  | 0.05505   |          |          |          |
| intake17  | 0.050187 | -0.06761 | 0.144684 | -0.10708 | -0.26597 | -0.18385  | -0.06944 | 0.07272  | -0.02136 | 0.10716  | 0.024502 | -0.08374 | 0.006872 | 0.078241 | 0.008872 | -0.17698 | -0.10520  | 0.09735   | -0.06262 | 0.197241 | 0.031037 | -0.22337 | -0.14557 | -0.00761 | 0.069397 | 0.047931 | 0.1586   | -0.01177 | 0.050214 | 0.141883 | -0.00388 | -0.04757 | -0.01326 | -0.19324 | -0.0789  | 0.16807  | -0.15846  | -0.189   |          |          |
| intake18  | -0.0208  | -0.0381  | 0.147631 | 0.042781 | 0.00767  | 0.106349  | 0.048389 | -0.02919 | 0.033682 | -0.1439  | -0.14301 | -0.01206 | -0.05058 | -0.04743 | -0.09155 | 0.02578  | 0.05628   | 0.007616  | -0.00432 | 0.088659 | -0.12174 | -0.04498 | 0.18557  | -0.04115 | 0.087744 | -0.19225 | -0.09055 | -0.03591 | 0.001289 | -0.20452 | -0.10226 | 0.065805 | -0.13423 | -0.04013 | -0.00414 | 0.035568 | -0.02796  | 0.19182  | 0.00885  |          |
| intake19  | 0.021641 | -0.08372 | 0.191258 | -0.00285 | 0.103679 | -0.07843  | -0.10652 | -0.05059 | 0.08992  | -0.06024 | -0.17304 | 0.175339 | 0.051973 | 0.138706 | -0.1119  | 0.020783 | -0.05629  | -0.005159 | 0.061894 | 0.028659 | 0.03315  | -0.10054 | -0.0923  | -0.08449 | -0.10891 | -0.04277 | 0.071116 | 0.04209  | 0.009453 | 0.050113 | -0.01191 | -0.02583 | -0.04037 | 0.02402  | -0.03682 | 0.12701  | 0.10699   | -0.1768  | -0.03537 |          |
| intake110 | -0.01354 | 0.08841  | -0.11941 | -0.01226 | -0.05381 | 0.131325  | -0.15838 | 0.074773 | -0.09712 | -0.02726 | -0.1276  | 0.037041 | 0.018279 | -0.02538 | 0.003071 | -0.1261  | 0.08511   | -0.03577  | -0.00508 | -0.07581 | -0.12468 | 0.016692 | -0.12456 | -0.00753 | 0.005201 | 0.199972 | -0.08669 | 0.04023  | -0.00944 | 0.078974 | 0.049846 | 0.025887 | -0.01122 | -0.0217  | -0.03771 | -0.24064 | -0.13376  | -0.0388  | -0.08737 |          |
| intake111 | 0.112837 | 0.06187  | -0.13396 | -0.09894 | -0.08172 | 0.106784  | -0.06417 | 0.171715 | 0.08005  | 0.049757 | 0.048792 | -0.01838 | 0.03535  | 0.118916 | -0.12994 | 0.08251  | 0.070136  | -0.0235   | 0.0252   | 0.04549  | -0.0285  | 0.04549  | -0.0285  | 0.04549  | -0.0285  | 0.04549  | -0.0285  | 0.04549  | -0.0285  | 0.04549  | -0.0285  | 0.04549  | -0.0285  | 0.04549  | -0.0285  | 0.04549  | -0.0285   | 0.04549  | -0.0285  |          |
| intake112 | 0.00223  | 0.00223  | 0.00223  | 0.00223  | 0.00223  | 0.00223   | 0.00223  | 0.00223  | 0.00223  | 0.00223  | 0.00223  | 0.00223  | 0.00223  | 0.00223  | 0.00223  | 0.00223  | 0.00223   | 0.00223   | 0.00223  | 0.00223  | 0.00223  | 0.00223  | 0.00223  | 0.00223  | 0.00223  | 0.00223  | 0.00223  | 0.00223  | 0.00223  | 0.00223  | 0.00223  | 0.00223  | 0.00223  | 0.00223  | 0.00223  | 0.00223  | 0.00223   | 0.00223  |          |          |
| intake113 | 0.140381 | -0.03972 | -0.17307 | 0.096775 | -0.0899  | -0.05869  | 0.094652 | 0.023604 | 0.075448 | 0.1272   | -0.0406  | -0.04018 | -0.10287 | 0.028038 | 0.16077  | -0.10953 | -0.1021   | 0.099451  | -0.0852  | 0.121869 | 0.095572 | 0.052473 | 0.068314 | 0.191522 | -0.02693 | 0.033997 | -0.00508 | -0.03164 | -0.0416  | -0.14959 | -0.04119 | -0.0415  | 0.116553 | -0.04256 | 0.093846 | 0.058951 | -0.00835  | -0.00434 | 0.022167 |          |
| intake114 | 0.01519  | -0.05985 | 0.07108  | -0.0324  | -0.0511  | -0.10612  | 0.064843 | 0.117848 | -0.00658 | 0.035578 | 0.114466 | -0.02401 | 0.026052 | 0.095914 | -0.02543 | -0.02315 | 0.086821  | 0.079564  | 0.079001 | -0.07013 | -0.04622 | -0.00568 | -0.04139 | -0.01570 | 0.095037 | 0.217543 | 0.071568 | -0.17163 | -0.10356 | 0.036963 | -0.05489 | -0.03179 | -0.00774 | -0.09116 | -0.12957 | 0.091461 | 0.123849  | 0.031209 |          |          |
| intake115 | -0.01234 | 0.089957 | -0.06477 | 0.121574 | 0.008202 | 0.130941  | -0.00716 | 0.192309 | -0.04715 | 0.09247  | 0.13051  | 0.241589 | -0.06871 | 0.137099 | 0.038462 | -0.05947 | -0.00191  | 0.016707  | -0.00165 | 0.049937 | 0.031965 | -0.00182 | -0.00777 | 0.038561 | 0.000108 | -0.03044 | -0.12271 | -0.0035  | -0.01912 | -0.1453  | 0.067263 | 0.081898 | 0.064511 | -0.07061 | 0.026291 | -0.1226  | -0.13261  | 0.066962 | 0.192863 |          |
| intake116 | 0.153772 | -0.09079 | -0.02864 | -0.05095 | -0.08172 | -0.1601   | 0.05245  | 0.007603 | -0.01603 | -0.10375 | 0.13023  | -0.20994 | -0.05759 | 0.005929 | -0.03498 | 0.037721 | -0.01009  | -0.1666   | -0.0487  | 0.149535 | 0.10242  | -0.02124 | -0.07677 | 0.048209 | 0.008908 | -0.08195 | -0.03998 | 0.03535  | 0.032768 | -0.02982 | -0.07533 | 0.077391 | 0.01516  | -0.03883 | 0.019136 | 0.034422 | -0.106825 | -0.06235 |          |          |
| intake117 | 0.150501 | -0.06011 | -0.05011 | -0.05011 | -0.05011 | -0.05011  | -0.05011 | -0.05011 | -0.05011 | -0.05011 | -0.05011 | -0.05011 | -0.05011 | -0.05011 | -0.05011 | -0.05011 | -0.05011  | -0.05011  | -0.05011 | -0.05011 | -0.05011 | -0.05011 | -0.05011 | -0.05011 | -0.05011 | -0.05011 | -0.05011 | -0.05011 | -0.05011 | -0.05011 | -0.05011 | -0.05011 | -0.05011 | -0.05011 | -0.05011 | -0.05011 | -0.05011  |          |          |          |
| intake118 | 0.181413 | 0.061827 | -0.08884 | 0.078144 | -0.08432 | 0.150383  | -0.09841 | -0.04132 | -0.0358  | -0.07535 | -0.04966 | -0.13639 | -0.05251 | -0.08342 | -0.05651 | -0.00644 | 0.032462  | -0.04455  | -0.10019 | 0.134825 | -0.04545 | -0.06843 | 0.14893  | -0.04825 | -0.04653 | 0.155349 | -0.15455 | 0.027707 | -0.12552 | 0.04482  | -0.01165 | -0.02556 | -0.05898 | -0.17215 | -0.07203 | -0.0489  | -0.02082  | -0.002   | 0.19637  | 0.115767 |
| intake119 | 0.178557 | 0.007374 | -0.1181  | 0.10961  | -0.0373  | -0.0778   | -0.14318 | -0.15936 | 0.038013 | -0.0347  | -0.1246  | 0.166304 | 0.04009  | 0.052291 | 0.024799 | -0.11006 | -0.01229  | 0.101074  | 0.036657 | -0.01204 | -0.06066 | 0.072641 | -0.04919 | -0.00744 | -0.02984 | 0.100509 | -0.05591 | -0.04799 | -0.09279 | -0.09094 | -0.04738 | 0.03083  | 0.052037 | 0.076794 | 0.076142 | -0.09549 | 0.089595  | 0.089595 |          |          |
| intake120 | 0.004077 | -0.10345 | -0.10345 | 0.162331 | -0.0177  | -0.043049 | 0.105373 | 0.024616 | 0.117954 | -0.21123 | 0.086959 | -0.00913 | 0.092867 | 0.003842 | -0.04116 | 0.051336 | -0.04886  | -0.06267  | -0.20551 | -0.02191 | 0.009955 | -0.07288 | 0.16918  | -0.03639 | -0.16634 | 0.0241   | -0.03503 | -0.07013 | -0.05412 | 0.020404 | 0.121919 | 0.03194  | 0.035756 | 0.116423 | 0.03271  | 0.055155 | -0.04955  | -0.05352 | 0.07579  |          |
| intake121 | -0.01908 | 0.02034  | -0.1023  | 0.08006  | -0.19663 | 0.02843   | -0.03653 | 0.024616 | 0.117954 | -0.0775  | -0.0752  | -0.04996 | -0.00898 | 0.098426 | 0.063912 | -0.04824 | -0.02033  | 0.049831  | 0.111848 | -0.05123 | 0.016911 | -0.17173 | -0.02922 | -0.1563  | -0.0782  | -0.02648 | 0.117351 | -0.07013 | -0.12568 | -0.13951 | 0.049925 | -0.13191 | -0.0447  | 0.18958  | -0.05485 | -0.00896 | -0.02983  | 0.157477 |          |          |
| intake122 | 0.01607  | 0.02846  | -0.10129 | 0.067977 | -0.11491 | -0.06569  | -0.17036 | -0.03673 | 0.115792 | -0.10037 | 0.04680  | -0.1205  | 0.02143  | 0.068057 | 0.015321 | 0.109576 | -0.1786   | -0.06152  | 0.13265  | -0.05874 | 0.071889 | -0.06652 | 0.023695 | -0.08102 | 0.002196 | 0.019123 | -0.04969 | 0.013908 | -0.04969 | 0.013908 | -0.04969 | 0.013908 | -0.04969 | 0.013908 | -0.04969 | 0.013908 | -0.04969  | 0.013908 |          |          |
| intake123 | 0.015425 | 0.015897 | 0.044622 | -0.1223  | 0.0641   | 0.159021  | -0.25335 | 0.080716 | 0.029373 | 0.089307 | -0.06104 | -0.04163 | -0.04258 | 0.031743 | 0.15513  | -0.027   | 0.050001  | 0.12795   | -0.08629 | 0.038564 | -0.02558 | 0.03383  | -0.06879 | -0.02718 | -0.0289  | 0.09301  | -0.06087 | -0.00787 | 0.000602 | 0.095213 | -0.05014 | -0.0734  | 0.04866  | 0.01118  | 0.013447 | 0.160478 | -0.02953  | -0.01945 |          |          |
| intake124 | 0.059686 | -0.1008  | -0.0515  | -0.0191  | 0.064913 | 0.075539  | 0.188521 | -0.02172 | -0.0812  | -0.0092  | -0.04941 | 0.221585 | -0.05463 | 0.036791 | 0.034561 | -0.09943 | 0.022448  | -0.1929   | -0.14504 | -0.11923 | -0.07087 | 0.063124 | -0.03478 | 0.038554 | 0.052963 | 0.129261 | -0.06553 | -0.1442  | 0.10274  | -0.06422 | -0.05538 | 0.050135 | -0.08069 | -0.13011 | 0.041246 | -0.02706 | 0.07449   | -0.0513  | -0.05066 |          |
| intake125 | -0.00254 | 0.0256   | 0.053483 | 0.007314 | -0.09566 | 0.141237  | 0.047377 | -0.18214 | -0.08518 | -0.09668 | -0.0204  | -0.08056 | 0.0426   | 0.05014  | -0.02294 | -0.12653 | 0.030354  | -0.08357  | -0.11465 | -0.05283 | -0.24773 | 0.060105 | 0.156244 | 0.212701 | -0.10899 | -0.02148 | -0.17314 | 0.185424 | -0.06467 | 0.154108 | 0.046322 | -0.13844 | 0.07293  |          |          |          |           |          |          |          |

Factor40 Factor41 Factor42 Factor43 Factor44 Factor45 Factor46 Factor47 Factor48 Factor49 Factor50 Factor51 Factor52  
0.028076 0.108039 -0.04651 -0.07577 -0.05772 -0.09846 -0.03992 0.059423 -0.01921 -0.11523 -0.13349 0.194908 0.073827  
-0.05808 -0.03525 -0.045 -0.137385 -0.01373 -0.06783 0.165921 0.123651 0.008293 -0.10654 0.063093 0.047372 -0.01299  
-0.14457 -0.00259 0.168288 0.122431 -0.07779 0.085906 0.100586 -0.05693 -0.01366 0.103401 0.096445 0.045557 0.036265  
-0.07361 0.071867 -0.02246 0.005565 -0.01926 -0.04208 0.061717 -0.06024 0.074979 0.006742 0.074233 0.238317 0.101999  
0.119034 0.076258 0.024255 0.016638 -0.13234 0.004124 0.037667 0.093915 0.028223 0.035438 -0.06231 0.039217 0.106894  
-0.14575 0.167481 -0.05965 0.116311 0.129471 0.120129 -0.07322 -0.12723 -0.02678 0.060111 -0.01499 -0.02848 0.028283  
0.103984 0.05904 0.01451 -0.05297 0.04272 0.041302 -0.14673 0.082666 0.022234 0.002622 -0.06945 -0.12492 0.028422  
0.033016 0.128783 0.307454 -0.1027 0.034154 -0.05295 -0.11089 0.057504 -0.06858 0.169986 -0.04602 0.197429 -0.09141  
-0.03312 0.134273 0.034301 0.035457 -0.05789 -0.17941 -0.05812 -0.07467 0.178821 0.129747 0.011699 -0.0339 0.039091  
0.033123 0.05491 0.078894 0.120858 -0.07487 0.067219 0.06637 -0.08748 0.00892 0.134333 -0.06612 0.031504 -0.06376  
0.053755 0.001908 0.012973 -0.00096 0.037308 -0.10158 -0.04735 -0.08109 -0.1244 -0.013932 0.121659 0.046929 0.04868  
-0.0062 -0.16656 -0.06189 0.02828 -0.06208 0.090782 -0.062086 -0.14134 0.052869 0.018164 0.06483 0.067054  
0.098279 -0.04859 0.028714 0.010227 0.059651 -0.04961 -0.03181 -0.09262 -0.00301 0.092418 0.088845 0.066573 -0.04813  
0.224187 -0.08977 -0.03779 -0.05999 0.038065 0.075457 -0.00484 -0.07026 -0.08123 0.002442 0.019263 0.12623 -0.02874  
-0.07513 0.067213 0.011171 -0.00254 -0.07781 0.047191 0.000141 -0.02221 -0.05594 0.036539 0.061456 0.160328 -0.20969  
0.024141 -0.03341 0.146478 0.063807 -0.06427 -0.02794 0.115686 -0.08317 -0.07532 0.017678 -0.07241 -0.06273 0.067526  
0.019007 0.057618 -0.0325 -0.01213 -0.14036 0.022698 -0.1236 -0.119329 0.062972 -0.03387 -0.06965 -0.03506 0.005378  
-0.06882 -0.06122 -0.08292 -0.07538 -0.12752 0.139144 -0.02658 -0.17468 0.05017 0.05895 0.032342 -0.03402 0.02205  
-0.04166 -0.00505 0.04426 -0.06003 -0.05876 -0.0173 -0.04508 0.014289 0.015723 0.087138 -0.12742 -0.23737 -0.02317  
0.067059 -0.03093 -0.03543 0.147008 0.061973 0.22008 0.153357 0.003034 -0.03080 0.093542 0.019972 -0.04543 0.075953  
0.0317 0.170892 0.011505 -0.00227 0.157102 -0.01313 0.144712 -0.1057 0.050981 -0.11332 -0.06235 -0.0547 0.104297  
0.261906 0.161532 0.042948 -0.01307 0.045067 0.062555 0.127273 -0.00513 0.119278 -0.10225 -0.07636 0.45462 -0.07804  
0.106501 -0.10596 -0.10057 -0.00671 -0.02949 -0.172 0.00665 -0.094 -0.08291 -0.09858 0.151476 -0.16916 -0.07335  
-0.07832 0.133741 -0.10368 0.055024 -0.09953 -0.01973 0.055169 0.074617 0.120004 -0.10057 -0.21811 -0.08255 -0.13211  
0.161119 0.185086 -0.06444 0.035226 0.12637 0.088466 -0.0275 -0.13335 -0.0551 0.053503 -0.00702 0.034781 -0.20429  
0.084048 -0.0802 0.091429 -0.12514 -0.12646 0.097849 0.03422 0.07314 0.147834 0.096555 0.042275 -0.04938 -0.08032  
-0.04622 0.000535 0.182292 -0.08141 -0.10783 -0.12229 -0.11969 0.020879 -0.06817 0.094407 -0.05376 -0.07519 -0.07393  
0.028185 -0.130941 0.138976 0.033944 0.074396 0.133048 -0.12831 0.030839 0.07327 0.11871 0.046954 0.025573 0.02659  
-0.1024 -0.06859 0.040345 0.105757 -0.08751 -0.05698 -0.03502 -0.10496 -0.06721 -0.2447 -0.17447 0.055508 -0.02863  
0.019515 0.141465 0.095278 0.154385 -0.06851 -0.03839 0.029281 -0.11315 0.005751 0.044417 0.140757 0.302262 0.044865  
-0.12165 0.023361 -0.12065 -0.04976 0.170752 0.059365 -0.0225 0.187972 0.029339 0.187253 0.051442 0.111021 -0.00354  
-0.05208 -0.01557 0.07392 -0.03887 -0.03325 0.002002 -0.34259 -0.15674 -0.02588 0.048107 0.01638 0.092128 0.243206  
0.022013 -0.0693 0.024811 -0.0467 -0.24816 0.04678 0.056556 0.013385 -0.0672 -0.3676 0.013228 0.018375 -0.15697  
-0.07058 -0.03497 0.023903 0.092309 0.039259 0.108202 0.012239 -0.00612 ##### -0.0645 -0.1064 0.008861 0.050253  
0.086538 -0.02652 -0.03348 0.036752 -0.03334 0.121328 0.006791 -0.11091 0.005529 0.121844 0.061445 -0.04169 0.039073  
0.026676 -0.14115 0.122905 0.194093 -0.21213 -0.01531 0.074123 -0.03038 0.026391 -0.09788 0.076536 0.024734 -0.00954  
-0.14375 -0.12551 -0.02162 -0.03976 0.081114 -0.1631 0.056147 0.068242 -0.16695 0.018456 -0.0907 0.034185 -0.0093  
-0.16005 -0.02464 0.056111 0.020143 -0.04757 -0.04733 0.099613 -0.09083 0.087466 0.202848 0.017492 0.044142 -0.01697  
0.061219 0.076861 -0.05898 0.061927 0.006657 0.029155 0.021033 0.060657 0.166322 -0.14517 0.133503 0.139564 -0.014756  
-0.02778 0.005607 0.169968 0.033985 0.143384 -0.08614 -0.0676 0.011606 0.114967 -0.03686 -0.03811 0.021348 -0.23236  
-0.05577 -0.07703 -0.19902 0.032214 -0.10062 0.049414 -0.10282 -0.06529 0.176152 -0.06624 0.204837 -0.05504 -0.06208  
0.004679 -0.0611 -0.05424 0.073021 0.031218 0.100379 -0.10615 -0.05565 0.017825 -0.10461 -0.10181 -0.10712 0.06595  
0.026507 -0.05272 0.021137 0.054183 0.070804 0.176413 -0.1144 -0.06566 0.013075 -0.05088 -0.10217 0.013158 0.009903  
-0.05804 0.097157 -0.0307 -0.14437 -0.1414 -0.10637 -0.02625 -0.05524 0.172119 -0.05877 -0.05125 -0.20817 0.091727  
0.059337 0.140272 -0.24076 -0.14901 -0.11583 0.040339 -0.0578 0.062452 0.072223 0.140726 0.018592 0.151555 0.017918  
0.025698 -0.05981 0.011575 -0.15764 0.196999 -0.10294 0.002236 -0.02754 -0.0333 0.080399 0.05803 -0.03512 0.015826  
-0.05289 0.078437 0.015829 0.028531 -0.03773 0.0687 0.040586 -0.01743 -0.04154 -0.11218 0.012205 -0.02156 0.215786  
-0.01 -0.08977 -0.15104 -0.18086 0.017275 0.08718 0.031862 -0.05522 -0.0266 0.11725 0.003301 -0.04695 0.147764  
0.027114 0.027954 -0.00626 0.108332 0.027303 -0.00494 -0.13957 0.06968 -0.00382 0.042963 -0.10448 -0.10569 0.127355  
-0.10848 -0.07063 -0.13954 -0.02885 0.01524 -0.00881 0.067116 -0.15494 0.01856 0.006794 0.158749 0.02389 0.07849  
0.221009 -0.12557 -0.02258 -0.13532 0.060063 -0.2113 -0.08976 -0.10286 -0.05323 -0.11493 0.038395 -0.09771 -0.07959  
-0.06674 -0.01257 -0.17178 -0.00764 0.022119 0.112504 0.042302 0.08191 -0.0329 0.156553 -0.03605 0.044662 0.039604  
-0.12925 0.031241 0.170624 -0.10009 -0.13562 0.172363 -0.10422 0.002902 0.028583 -0.0284 -0.21608 0.014057 0.032444  
-0.02328 0.0335 0.091414 0.028162 0.114151 -0.01636 -0.04341 0.093967 -0.0077 -0.07338 -0.02642 -0.03195 -0.03806  
0.021613 -0.00991 0.007259 -0.06758 -0.01301 -0.05284 -0.114473 0.07681 0.097865 -0.01636 0.085603  
0.014557 -0.12884 -0.01188 -0.03991 0.099625 -0.01939 0.08216 -0.01135 0.138315 -0.06558 -0.0597 0.175039 0.00726  
0.02692 -0.0009 0.019181 -0.17398 -0.01056 -0.14658 -0.03143 0.078157 -0.19592 0.039621 -0.08672 0.123711 0.076167  
0.085065 -0.07271 0.018854 -0.01426 0.042473 -0.0253 0.002324 -0.0864 0.013808 -0.08445 -0.0101 0.154742 -0.01831  
0.049981 -0.06756 0.045609 -0.19353 0.158501 0.146471 0.146206 0.072406 -0.01249 -0.07622 0.086433 -0.03378 -0.23689  
0.06649 0.15733 0.048595 0.096281 -0.13144 -0.0181 0.094616 -0.04753 -0.00122 0.177763 0.011654 -0.0827 -0.00296  
0.119184 0.029693 -0.06491 0.01817 -0.10181 0.084102 0.22826 0.010059 0.127451 0.047253 -0.10637 0.13607  
0.067859 0.058123 -0.06061 0.001471 0.090537 0.016015 0.00311 0.132672 -0.08601 0.06543 -0.01405 0.090846 -0.02897  
-0.04522 -0.03711 0.1208 0.074067 -0.09876 -0.04014 -0.05128 0.147529 0.040375 -0.05789 0.075046 0.002325 -0.06585  
0.100246 0.11945 0.236453 -0.04106 0.023603 0.072128 -0.00927 -0.16642 -0.18162 0.051345 0.044884 0.043936 -0.00259  
0.01536 -0.04364 0.028217 0.056415 0.068822 0.010787 0.063474 0.19949 0.017215 -0.04884 0.057624 -0.00041 0.016999  
0.05913 0.044444 -0.06477 -0.0647 0.069674 0.31286 -0.09074 -0.12536 -0.09655 -0.0366 0.0175021 -0.10268 0.041849  
-0.09975 -0.0717 -0.04915 -0.00871 0.022646 -0.17329 0.240962 -0.20329 0.008439 -0.02614 -0.0575 -0.04916 0.170823  
0.040834 -0.05319 0.046984 0.089611 0.040503 -0.13292 0.13234 0.062126 0.143635 0.053463 0.075919 0.006989 -0.06014  
-0.03724 0.058739 0.069901 0.107003 0.041496 0.072259 -0.04324 -0.03284 -0.14925 -0.0852 0.028669 -0.06458 0.127685  
-0.05759 -0.00213 -0.23615 -0.00473 0.012189 0.006423 -0.12069 0.029087 -0.02616 -0.02372 0.000376 -0.03257 0.046097  
-0.0645 0.038219 0.082303 -0.00132 0.07857 0.056676 0.011298 -0.1298 -0.19579 -0.18204 -0.17213 -0.00345 -0.06905  
0.072368 0.025572 -0.18609 0.12537 0.172023 -0.17846 -0.06585 0.151515 0.061278 0.09259 -0.02022 0.04459 0.134256  
0.047424 -0.08057 0.020535 -0.01923 0.109959 -0.05895 0.051448 0.020365 0.137724 0.029366 -0.02965 -0.09412 0.113768  
0.011834 -0.03343 0.003343 -0.18256 0.020063 0.038624 -0.1089 0.146268 -0.00322 0.00977 0.13806 -0.09421 -0.09616  
0.01781 -0.053 -0.07574 0.133073 0.015035 0.009218 0.037368 0.045116 0.031805 0.017044 0.026934 -0.03025 -0.11192  
-0.01225 -0.12945 -0.06942 0.057996 -0.12442 0.147305 -0.13828 0.023095 -0.05179 0.044307 -0.13521 -0.02932 -0.12105  
0.05972 -0.05511 -0.09921 0.146789 0.199162 -0.04748 -0.08966 -0.08478 -0.02761 -0.05365 -0.30507 -0.00137 -0.00593  
-0.0169 -0.0716 0.065045 -0.10338 0.040873 0.000873 0.010168 0.008327 0.151589 -0.04005 0.0257514 -0.0634 0.080493  
0.018073 -0.2105 0.106035 -0.04483 0.026616 0.072806 0.063465 -0.00026 0.044045 -0.09691 -0.13296 0.079373 0.099109  
0.06371 0.11144 -0.09709 -0.05806 0.003397 -0.16461 0.074672 -0.08285 -0.11701 0.258024 -0.13033 -0.03556 0.033361  
-0.00846 0.038248 -0.01937 0.21048 -0.12314 -0.01771 -0.12502 -0.03399 -0.02611 0.080945 0.152798 -0.11401 -0.06485  
-0.073583 -0.10353 0.144354 0.011625 0.013504 0.010359 0.013931 0.119433 0.161844 0.037012 0.028688 0.08317 0.00697  
-0.05479 -0.01849 0.079885 -0.01546 -0.04067 -0.17487 0.100341 0.233785 -0.02754 -0.02184 -0.00307 0.030842 0.097947  
0.082742 -0.01053 -0.12598 -0.07797 -0.07583 0.152613 0.034353 0.093663 -0.07384 0.021773 -0.05142 0.250077 0.048081  
0.025907 -0.1856 0.07696 -0.02047 0.214326 0.041887 -0.09446 -0.07263 0.285257 0.080993 -0.07377 -0.01453 -0.08  
-0.12414 -0.06872 0.020709 0.004317 0.017323 0.001019 0.074273 0.106783 -0.04306 -0.13494 0.071348 0.118822 -0.02545  
0.025819 -0.07881 -0.00469 -0.02037 -0.15666 0.009096 0.033206 0.022296 0.00544 -0.01955 -0.0315 -0.02787 0.014674  
0.165159 0.015908 0.094192 0.01449 0.12713 0.101192 0.001576 0.066037 0.154596 0.029406 0.051419 0.15562 0.106566  
-0.15374 -0.06989 -0.06397 -0.06831 -0.01363 -0.15349 0.117998 0.059545 0.045286 0.065254 -0.09898 0.009828 -0.21544  
0.068415 -0.04249 -0.00506 -0.01936 -0.03137 0.001223 -0.02546 0.054865 0.017115 0.017253 -0.06786 0.016066 0.026577  
-0.09917 0.149545 0.033134 -0.13392 0.060439 -0.03269 0.097896 -0.13449 -0.14858 0.028767 0.113993 -0.23658 0.006249  
-0.05625 0.163448 -0.19053 -0.01352 0.087333 0.142775 -0.07428 -0.09483 0.017369 -0.13275 0.18169 0.067151 -0.11337  
-0.07764 -0.04916 -0.02744 0.07991 0.14338 -0.137467 -0.12435 -0.07839 -0.02187 -0.042536 0.07292 0.091546 0.057782  
-0.04434 -0.12833 0.084123 0.035471 -0.00789 0.150836 0.134825 0.042504 0.030302 0.050002 0.081112 -0.00566 0.101028  
-0.07083 -0.01257 -0.10759 -0.05101 -0.08519 -0.03548 -0.09366 -0.06848 -0.0368 -0.17433 -0.10662 0.023697 -0.16206  
0.078564 -0.03779 -0.01736 0.026543 0.179167 -0.14174 -0.02757 0.020627 0.136598 0.060637 0.063893 0.02766 0.029455  
0.023679 -0.07969 0.019585 0.051063 0.072862 0.063648 -0.17243 -0.00901 -0.03224 0.15346 -0.06561 0.04563 0.106675  
-0.19519 -0.00369 0.044012 0.091168 0.141774 0.125205 0.060172 0.079017 -0.06215 0.039556 -0.00319 -0.08184 -0.00983  
0.025047 -0.04873 -0.02852 -0.16363 0.026596 0.159567 -0.04413 0.110946 -0.08217 0.047156 -0.08217 -0.07342 -0.03466  
-0.12365 -0.14755 -0.03194 0.073588 0.057577 0.009573 -0.02574 0.03013 -0.16038 0.169346 -0.01855 0.003454 -0.17251  
-0.0726 0.185995 0.125693 0.107938 0.207763 0.089533 0.048674 0.168995 -0.04263 -0.00918 0.020032 -0.12336 0.009104  
-0.10457 0.007482 -0.03681 -0.20239 -0.01359 -0.10411 0.058193 -0.29821 0.128454 0.085197 -0.10239 0.119268 -0.11497  
0.113331 -0.1136 0.059147 0.080104 -0.00175 -0.08899 0.074138 -0.08414 0.017138 0.030633 -0.09755 -0.05128 0.090418  
0.05573 0.072712 0.102461 0.017546 0.12681 0.02454 0.04134 -0.01067 0.064031 0.030967 -0.16419 -0.02847 0.075776  
-0.22616 0.126067 -0.04335 0.043793 0.137563 -0.00613 0.062377 0.035264 -0.03462 -0.10959 0.122445 0.04549 -0.03224  
-0.40213 0.00679 0.055265 -0.23092 0.017408 0.063599 0.011141 -0.04915 0.236943 -0.00608 -0.02355 0.046323 -0.02422  
-0.04793 0.070569 -0.04622 -0.14273 -0.05377 0.041872 -0.03539 0.046256 0.020726 -0.18308 0.15608 0.085178 0.151986  
0.059948 -0.23908 -0.14165 0.234284 -0.00508 0.036207 0.008046 -0.16175 0.032992 0.12569 0.002409 0.022149 -0.11805  
0.073134 0.168104 -0.05251 0.164129 -0.07959 -0.09928 -0.13505 0.100574 0.014406 -0.04474 -0.01536 -0.06123 -0.21888
