# Supplementary figures and images for: Identification of Salty Dietary Patterns of the Japanese Macroregion
Source: Hindawi journal article supplement (doi:10.1155/2021/6675418), 2021-07-22

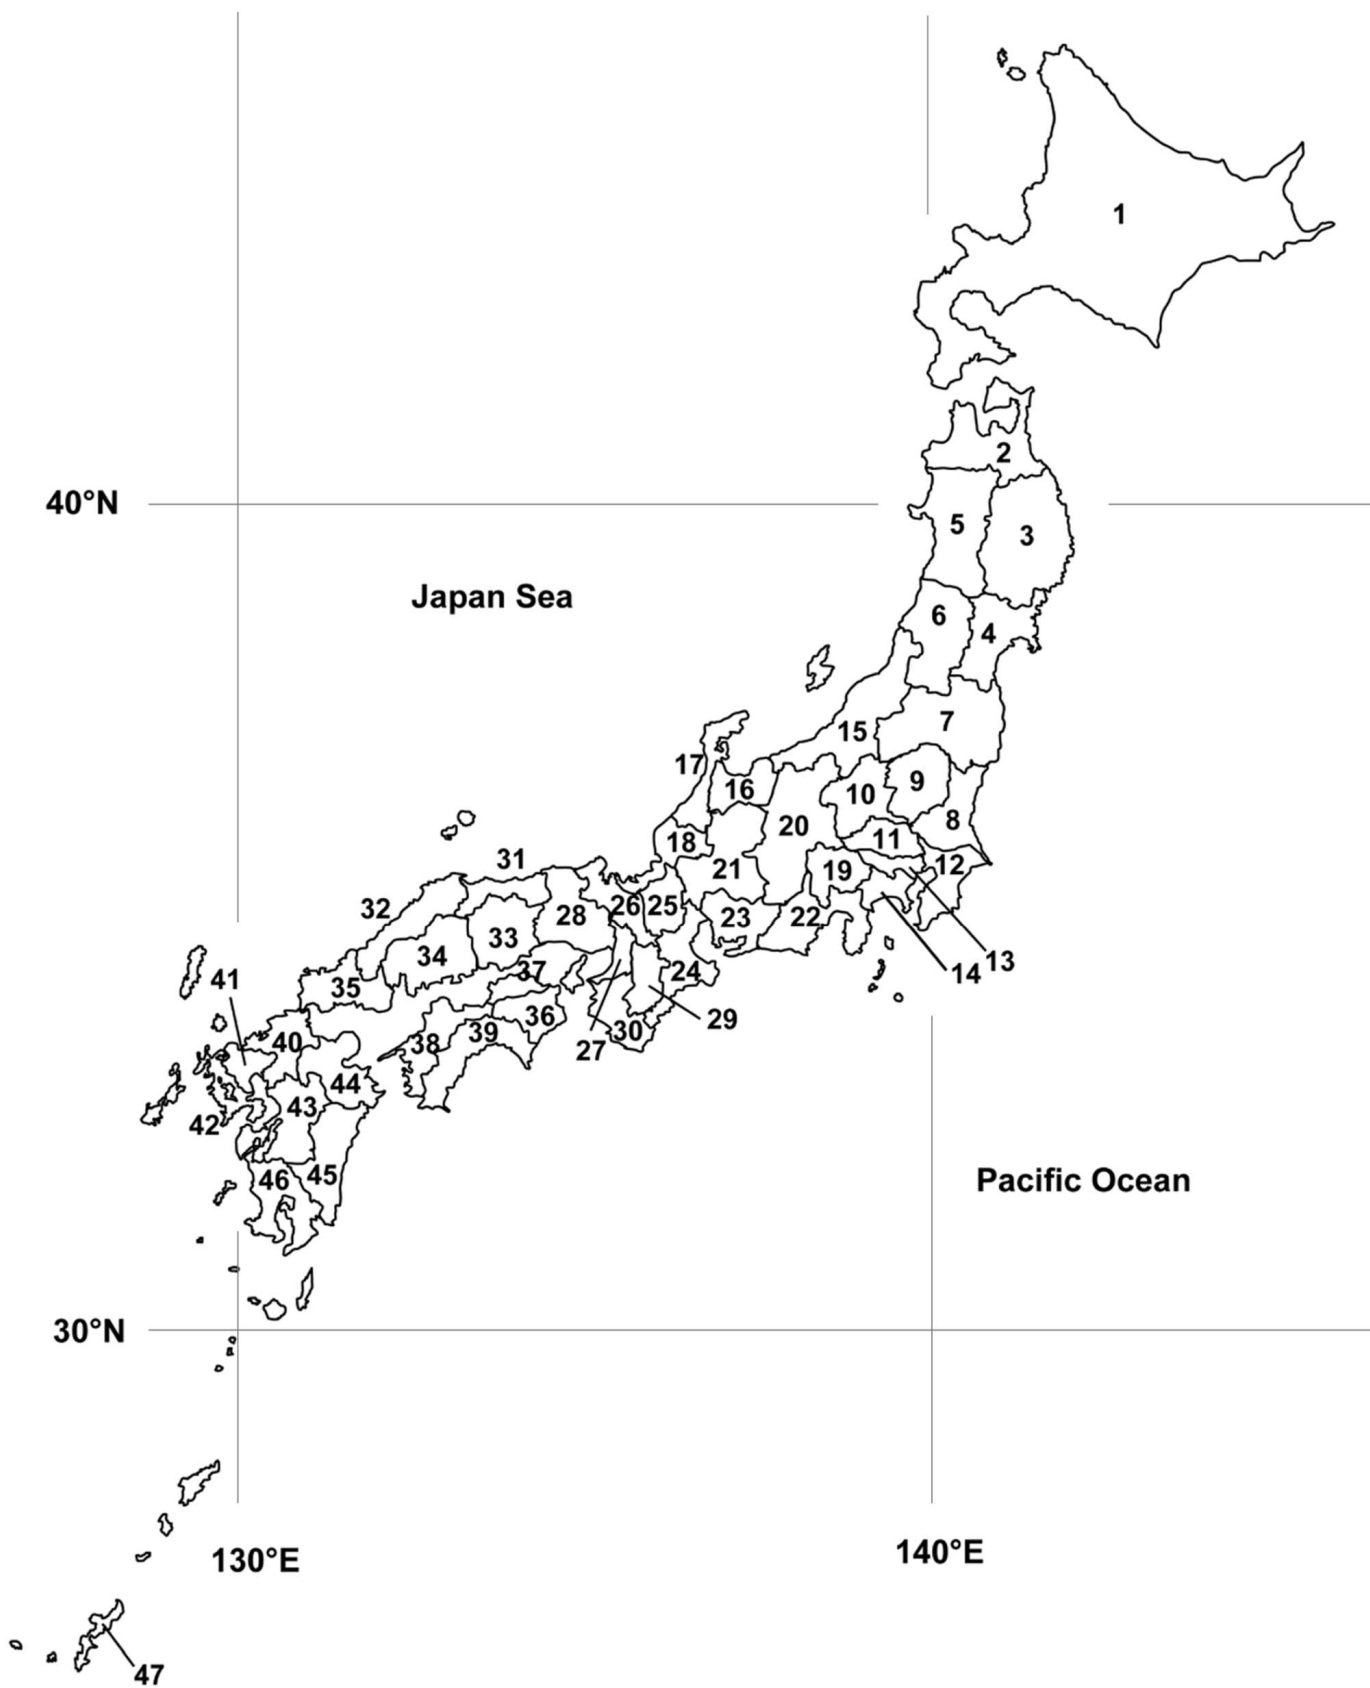

Supplement: f1 [file 6675418.f1.zip]
